# Supplementary material for: Axially chiral styrene-based organocatalysts and their application in asymmetric cascade Michael/cyclization reaction
Source: Royal Society of Chemistry journal article supplement (doi:10.1039/d3sc02705h), 2023-01-01

**Axially chiral styrene-based organocatalysts and their application in asymmetric cascade Michael/cyclization reaction**

*Yu Hao, Zi-Hao Li, Zhi-Gang Ma, Ru-Xin Liu, Rui-Tian Ge, Quan-Zhe Li, Tong-Mei Ding, Shu-Yu Zhang\**

<sup>†</sup>Shanghai Key Laboratory for Molecular Engineering of Chiral Drugs, School of Chemistry and Chemical Engineering, Shanghai Jiao Tong University, Shanghai 200240, China

Corresponding Authors:

\*E-mail: [zhangsy16@sjtu.edu.cn](mailto:zhangsy16@sjtu.edu.cn)

## Content

|                                                                                           |      |
|-------------------------------------------------------------------------------------------|------|
| 1. General information.....                                                               | S1   |
| 2. General procedure for synthesis of the products .....                                  | S4   |
| 2.1 General procedure for the synthesis of spiro[pyrrolidin-3,20-oxindole] <b>3</b> ..... | S4   |
| 2.2 Gram scale synthesis.....                                                             | S4   |
| 2.3 Synthetic applicability experiments.....                                              | S4   |
| 3. The synthesis of catalysts .....                                                       | S9   |
| 4. X-ray structure .....                                                                  | S16  |
| 5. Theoretical calculations on the role of chiral organocatalysts .....                   | S19  |
| 6. References.....                                                                        | S70  |
| 7. NMR data.....                                                                          | S71  |
| 8. NMR spectras.....                                                                      | S102 |

## 1. General information

**Reagents:** All commercial materials were used as received unless otherwise noted. All other solvents (DCM, DCE, THF, et al) used in this manuscript were purchased from Energy in anhydrous form. Toluene and Et<sub>2</sub>O were purified by standard procedures prior to use.

Enynamide **1a-1y** were prepared according to the literature procedure.<sup>1</sup>

Isatinimine **2a-2g** were prepared according to the literature procedure.<sup>2</sup>

**Instruments:** Flash chromatography was carried out on 200-300 mesh silica gel, eluting with a mixture of petroleum ether (b.p. 60-90 °C) and ethyl acetate. <sup>1</sup>H NMR and <sup>13</sup>C NMR spectra were acquired on a Bruker AVANCE III HD spectrometer (400M or 500M) and calibrated using residual solvent peaks as internal reference. Enantiomeric excesses were measured on an Agilent HPLC. Optical rotations were measured on a Rudolph Research Analytical (Autopol VI). High resolution mass spectra (HRMS) were operated on a Bruker Daltonics Solarix 7.0 Tesla Fourier Transform Ion Cyclotron Resonance (FT-ICR) Mass Spectrometer using the electrospray ionization (ESI) technique.

**Table S1. Optimization of the Catalyst <sup>a</sup>**

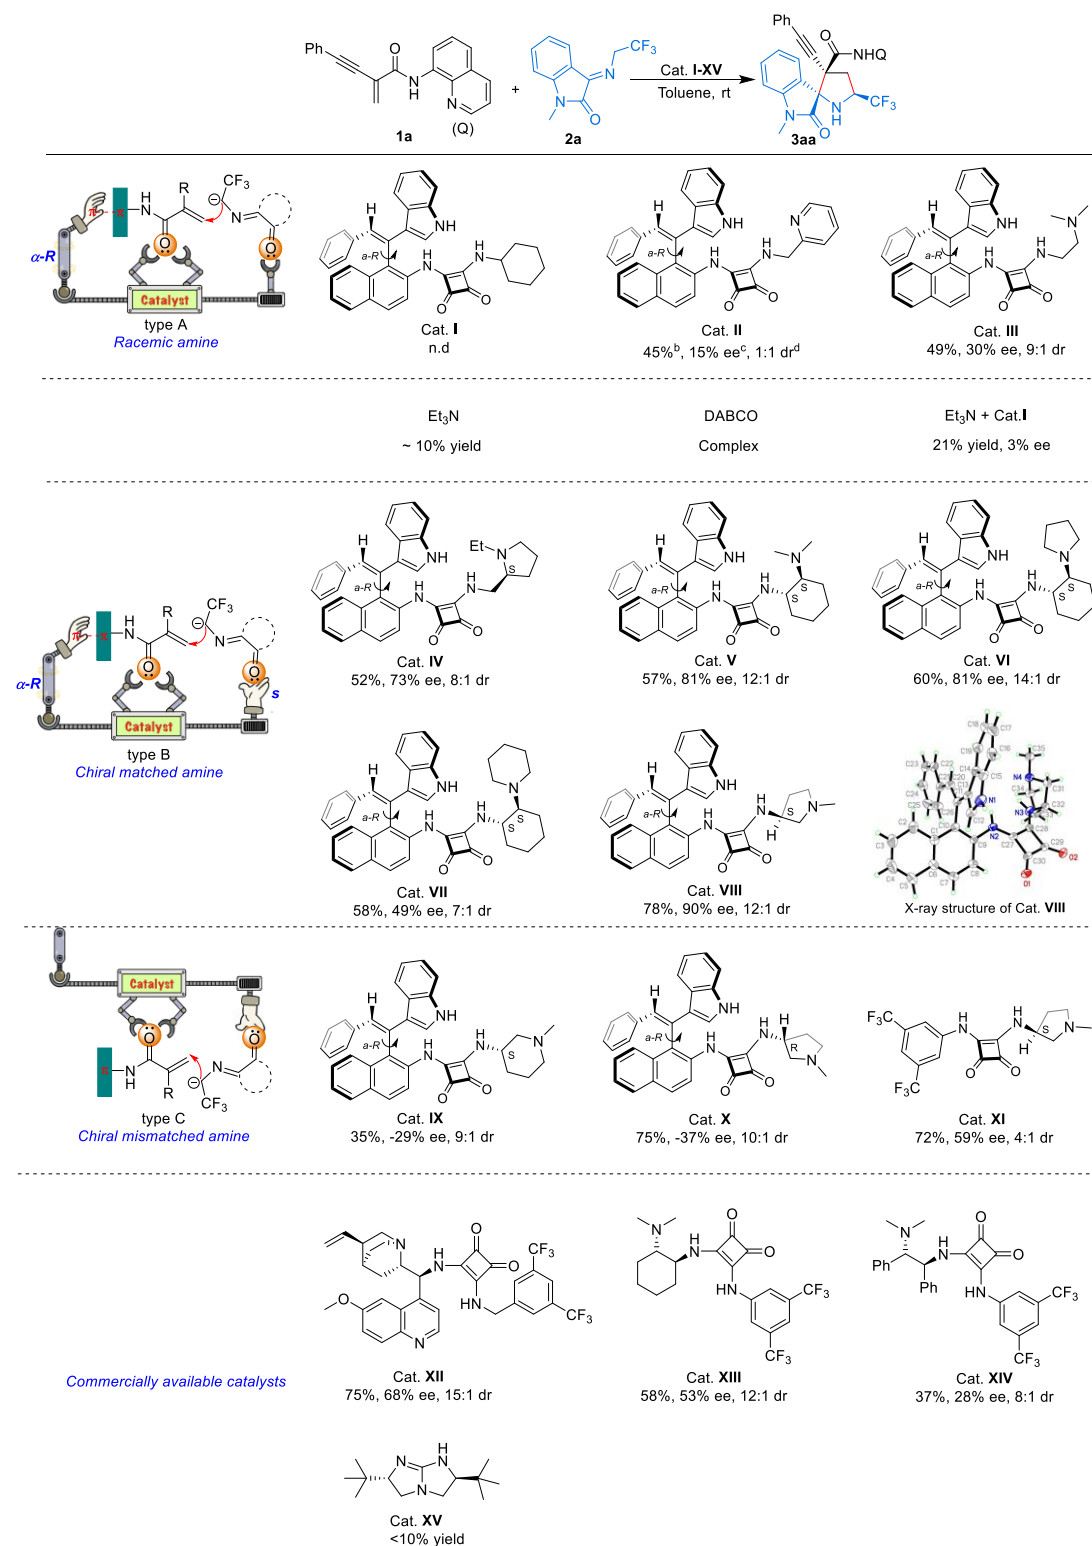

<sup>a</sup> Reaction conditions: **1a** (0.1 mmol), **2a** (0.15 mmol) and organocatalyst (10 mol%) in Toluene (1.0 mL) stirred at the indicated temperature for 12 h. <sup>b</sup> Isolated yield. <sup>c</sup> The ee value was determined by HPLC analysis. <sup>d</sup> The dr value was determined by <sup>1</sup>H NMR analysis.

**Table S2. Asymmetric Cascade Michael/Cyclization Reaction <sup>a</sup>**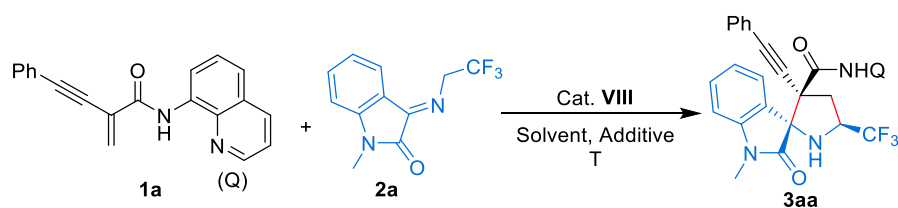

| entry | solvent           | additive          | T (°C) | yield (%) <sup>b</sup> | ee (%) <sup>c</sup> | dr <sup>d</sup> |
|-------|-------------------|-------------------|--------|------------------------|---------------------|-----------------|
| 1     | Toluene           | ----              | rt     | 78                     | 90                  | 12:1            |
| 2     | DCM               | ----              | rt     | 81                     | 89                  | 13:1            |
| 3     | Et <sub>2</sub> O | ----              | rt     | 46                     | 69                  | 8:1             |
| 4     | DCE               | ----              | rt     | 83                     | 91                  | 13:1            |
| 5     | DCE               | ----              | 0      | 81                     | 92                  | 14:1            |
| 6     | DCE               | 3Å MS             | 0      | 80                     | 92                  | 14:1            |
| 7     | DCE               | 4Å MS             | 0      | 81                     | 94                  | 14:1            |
| 8     | DCE               | 5Å MS             | 0      | 78                     | 93                  | 14:1            |
| 9     | DCE               | MgSO <sub>4</sub> | 0      | 82                     | 94                  | 14:1            |

<sup>a</sup> Reaction conditions: **1a** (0.2 mmol), **2a** (0.3 mmol), additive (60 mg) and **Cat. VIII** (10 mol%) in solvent (2.0 mL) stirred at the indicated temperature for 24 h. <sup>b</sup> Isolated yield. <sup>c</sup> The ee value was determined by HPLC analysis. <sup>d</sup> The dr value was determined by <sup>1</sup>H NMR analysis.

The results of 4Å MS as additive and MgSO<sub>4</sub> as additive in the template reaction were comparable, but the overall results in the substrate expansion were better with MgSO<sub>4</sub>, so MgSO<sub>4</sub> was selected as an additive.

## 2. General procedure for synthesis of the products

### 2.1 General procedure for the synthesis of spiro[pyrrolidin-3,20-oxindole] 3

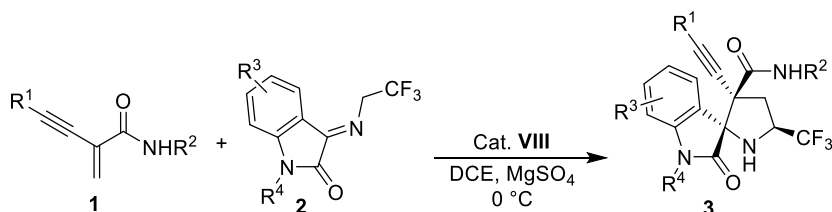

To a mixture of enynamide **1** (0.2 mmol), *N*-2,2,2-trifluoroethylisatin **2** (0.3 mmol), MgSO<sub>4</sub> (60 mg) and Cat. **VIII** (0.02 mmol, 10 mol%, 10.7 mg) was added DCE (2.0 mL). Then reaction mixture was stirred at 0 °C for 24 hours. Next, the reaction mixture was concentrated under reduced pressure. The resulting residue was purified by flash column chromatography to give the corresponding spiro[pyrrolidin-3,2'-oxindole] **3**.

### 2.2 Gram scale synthesis

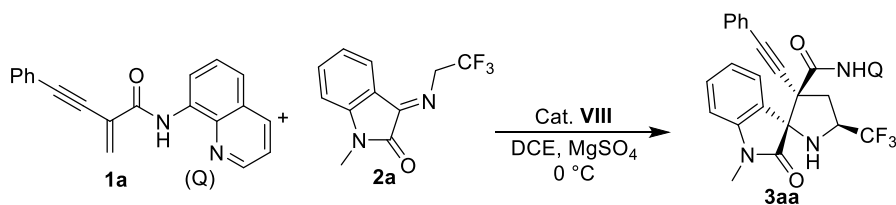

To a mixture of enynamide **1a** (596 mg, 2 mmol), *N*-2,2,2-trifluoroethylisatin **2a** (726 mg, 3 mmol), MgSO<sub>4</sub> (600 mg) and Cat. **VIII** (108 mg, 0.2 mmol, 10 mol%) was added DCE (20 mL). Then reaction mixture was stirred at 0 °C for 24 hours. Next, the reaction mixture was concentrated under reduced pressure. The resulting residue was purified by flash column chromatography to give the corresponding spiro[pyrrolidin-3,2'-oxindole] **3aa** (886 mg, 82% yield, 93% ee, 13:1 dr).

### 2.3 Synthetic applicability experiments

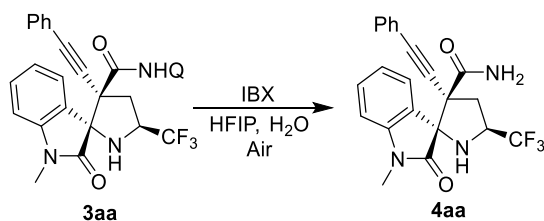

To a dried sealing tube were added (3*R*,3'*R*,5'*S*)-1-methyl-2-oxo-3'-(phenylethynyl)-*N*-(quinolin-8-yl)-5'-(trifluoromethyl)spiro[indoline-3,2'-pyrrolidine]-3'-carboxamide **3aa** (84 mg, 0.1 mmol, 1.0 eq) and IBX (56 mg, 0.2 mmol, 2.0 eq). The mixture in 2.0 mL of mixed solvent ( $V_{\text{HFIP}}/V_{\text{H}_2\text{O}} = 1:1$ ) was stirred at 60 °C in oil bath under air atmosphere for 5 h. The reaction was quenched by the addition of NaHCO<sub>3</sub> (aq. 3.0 mL), extracted with dichloromethane, dried over

anhydrous Na<sub>2</sub>SO<sub>4</sub>. Then the organic solvent was concentrated under reduced pressure and resulting residue was purified by silica gel flash column (petroleum ether/ethyl acetate = 1/1) to give primary amide product **4aa** as a yellow solid (60 mg, 72% yield).<sup>3</sup>

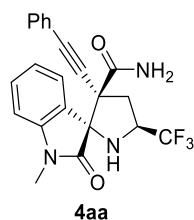

60 mg, 72% yield, white solid.  $[\alpha]_D^{20}$  -202.80 (c 0.5, CHCl<sub>3</sub>, 99% ee)

**HPLC** (Daicel Chiralpak AD-H, hexane/*i*-PrOH = 80:20, 1.0 mL/min, 254 nm): tR (minor) = 4.4 min, tR (major) = 5.4 min.

**<sup>1</sup>H NMR** (500 MHz, CDCl<sub>3</sub>) δ 7.77 (d, *J* = 7.4 Hz, 1H), 7.51 – 7.45 (m, 2H), 7.43 – 7.36 (m, 4H), 7.10 (t, *J* = 7.6 Hz, 1H), 6.83 (d, *J* = 7.8 Hz, 1H), 5.62 (s, 1H), 5.43 (s, 1H), 4.45 – 4.36 (m, 1H), 3.77 (t, *J* = 11.6 Hz, 1H), 3.14 (s, 3H), 2.56 (dd, *J* = 12.2, 6.0 Hz, 2H), 1.87 (s, 1H). **<sup>13</sup>C NMR** (126 MHz, CDCl<sub>3</sub>) δ 175.6, 168.3, 145.2, 131.7, 130.9, 129.3, 128.6, 125.8, 125.7 (q, *J*<sub>CF</sub> = 279.3 Hz), 125.0, 122.2, 121.4, 108.4, 88.7, 86.5, 70.8, 58.2 (q, *J*<sub>CF</sub> = 32.3 Hz), 57.6, 35.2, 26.3. **<sup>19</sup>F NMR** (376 MHz, CDCl<sub>3</sub>) δ -75.1. **HRMS**: calculated for C<sub>22</sub>H<sub>19</sub>F<sub>3</sub>N<sub>3</sub>O<sub>2</sub> [M+H<sup>+</sup>] 414.1424, found 414.1432.

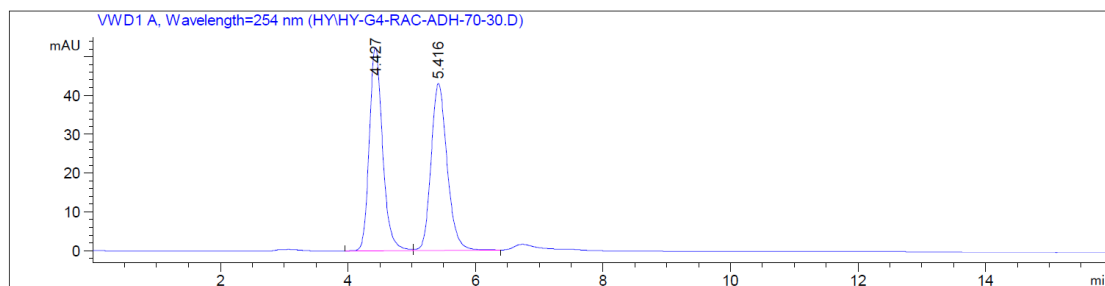

| Peak # | RetTime [min] | Type | Width [min] | Area [mAU*s] | Height [mAU] | Area %  |
|--------|---------------|------|-------------|--------------|--------------|---------|
| 1      | 4.427         | BV   | 0.2225      | 757.32269    | 52.42448     | 50.1700 |
| 2      | 5.416         | VB   | 0.2681      | 752.19098    | 42.98846     | 49.8300 |

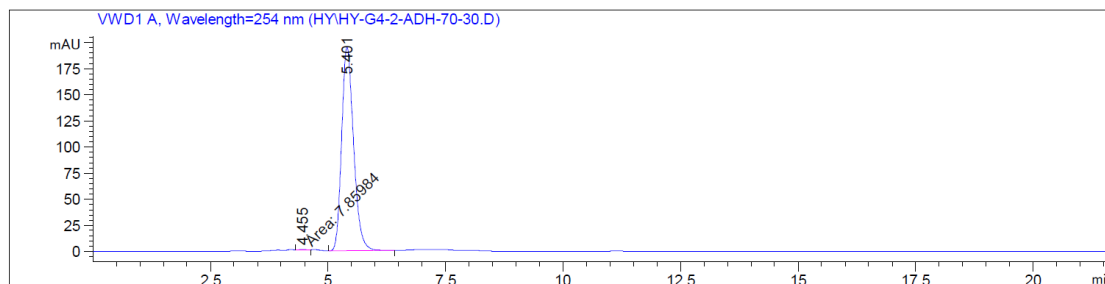

| Peak # | RetTime [min] | Type | Width [min] | Area [mAU*s] | Height [mAU] | Area %  |
|--------|---------------|------|-------------|--------------|--------------|---------|
| 1      | 4.455         | MM   | 0.2225      | 7.85984      | 5.88645e-1   | 0.2277  |
| 2      | 5.401         | BB   | 0.2716      | 3444.35840   | 195.49182    | 99.7723 |

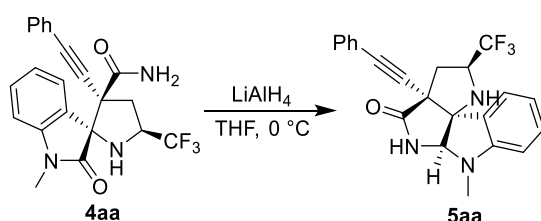

To primary amide **11a** (65 mg, 0.15 mmol, 1.0 eq) in THF (10 mL) at  $0\text{ }^\circ\text{C}$ ,  $\text{LiAlH}_4$  (74 mg, 1.9 mmol, 13 eq) was added under nitrogen atmosphere. The resulting mixture was stirred for 2 hours at  $0\text{ }^\circ\text{C}$ , and then quenched with several drops of saturated brine. The reaction mixture was subsequently washed with ethyl acetate. The combined organic layers were dried over  $\text{Na}_2\text{SO}_4$  and concentrated under reduced pressure. The residue was purified by silica gel chromatography (PE/EA = 4/1), affording product **11b** (24 mg) as a yellow oil in 41% yield with 99% ee.<sup>4</sup>

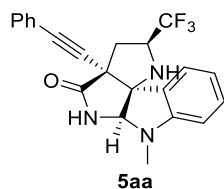

24 mg, 41% yield, yellow oil.  $[\alpha]_D^{20} -102.60$  (c 0.5,  $\text{CHCl}_3$ , 99% ee)

**HPLC** (Daicel Chiralpak AD-H, hexane/*i*-PrOH = 80:20, 1.0 mL/min, 254 nm): tR (minor) = 7.6 min, tR (major) = 12.6 min.

**$^1\text{H NMR}$**  (400 MHz,  $\text{CDCl}_3$ )  $\delta$  7.38 (d,  $J = 7.5$  Hz, 1H), 7.30 – 7.13 (m, 6H), 6.82 (t,  $J = 7.5$  Hz, 1H), 6.62 (s, 1H), 6.51 (d,  $J = 7.9$  Hz, 1H), 4.93 (s, 1H), 4.46 – 4.34 (m, 1H), 2.89 (s, 3H), 2.85 (dd,  $J = 13.8, 8.1$  Hz, 1H), 2.72 (dd,  $J = 13.8, 7.5$  Hz, 1H), 2.65 – 2.53 (s, 1H).  **$^{13}\text{C NMR}$**  (101 MHz,  $\text{CDCl}_3$ )  $\delta$  174.8, 150.8, 131.7, 130.8, 128.4, 128.1, 127.4, 125.4 (q,  $J_{\text{CF}} = 279.5$  Hz), 124.7, 122.3, 118.2, 107.4, 87.5, 85.7, 85.4, 81.0, 60.2 (q,  $J_{\text{CF}} = 31.5$  Hz), 55.1, 38.3, 32.6.  **$^{19}\text{F NMR}$**  (376 MHz,  $\text{CDCl}_3$ )  $\delta$  -77.1. **HRMS**: calculated for  $\text{C}_{22}\text{H}_{19}\text{F}_3\text{N}_3\text{O}$   $[\text{M}+\text{H}^+]$  398.1475, found 398.1472.

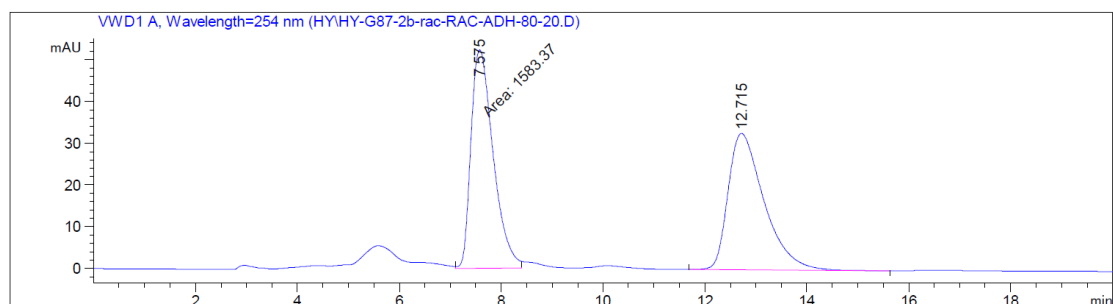

| Peak # | RetTime [min] | Type | Width [min] | Area [mAU*s] | Height [mAU] | Area %  |
|--------|---------------|------|-------------|--------------|--------------|---------|
| 1      | 7.575         | MF   | 0.5045      | 1583.37097   | 52.31336     | 49.5992 |
| 2      | 12.715        | BB   | 0.7439      | 1608.96155   | 32.71099     | 50.4008 |



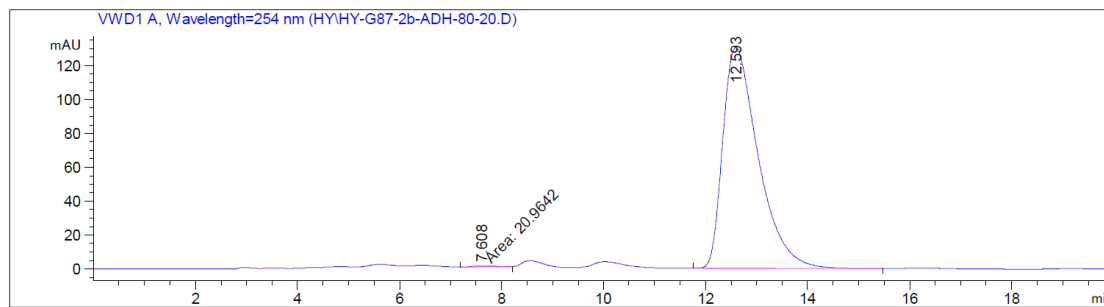

| Peak # | RetTime [min] | Type | Width [min] | Area [mAU*s] | Height [mAU] | Area %  |
|--------|---------------|------|-------------|--------------|--------------|---------|
| 1      | 7.608         | MM   | 0.5536      | 20.96418     | 6.31174e-1   | 0.3319  |
| 2      | 12.593        | BB   | 0.7313      | 6294.61377   | 130.38011    | 99.6681 |

### Cosy spectra

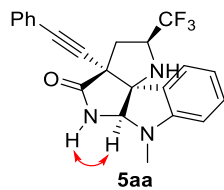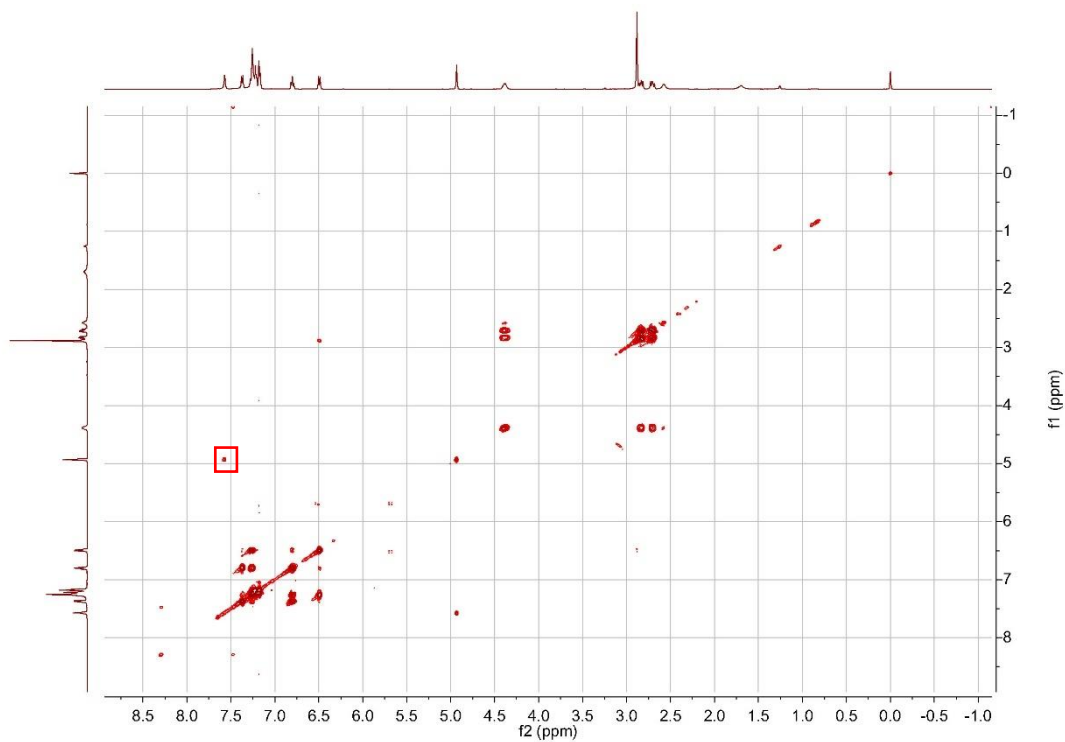

## Noesy spectra

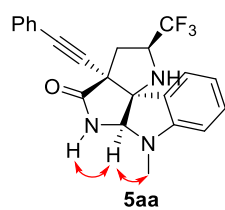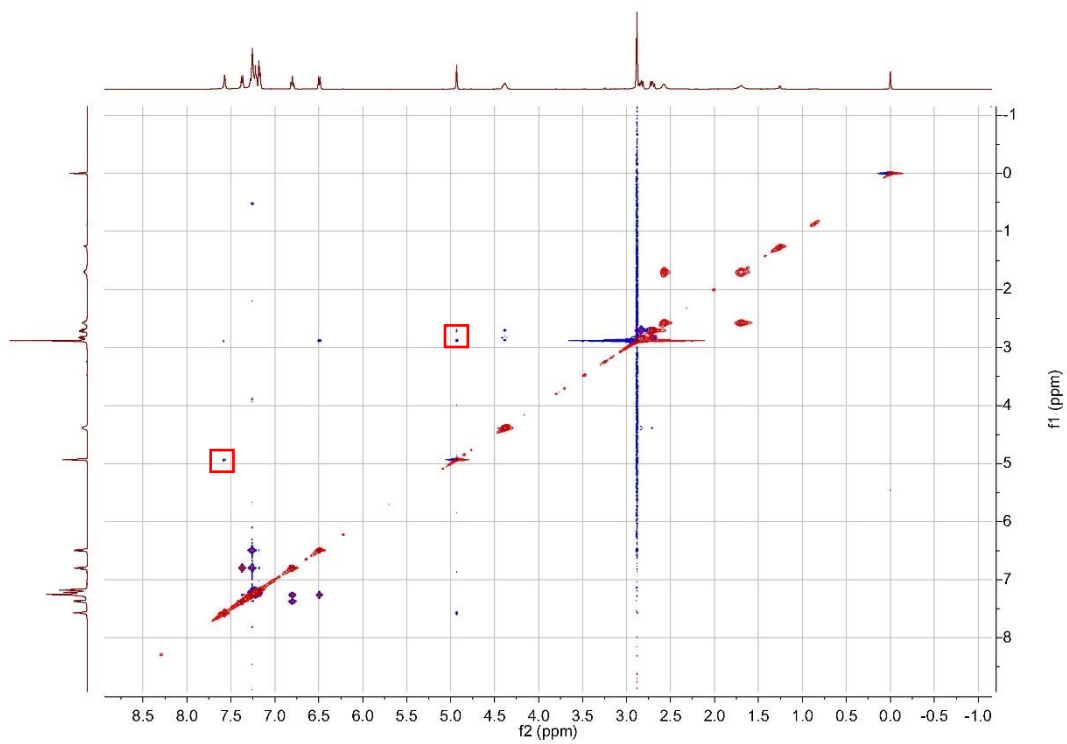

### 3. The synthesis of catalysts

Figure S1: Synthesis route of catalysts

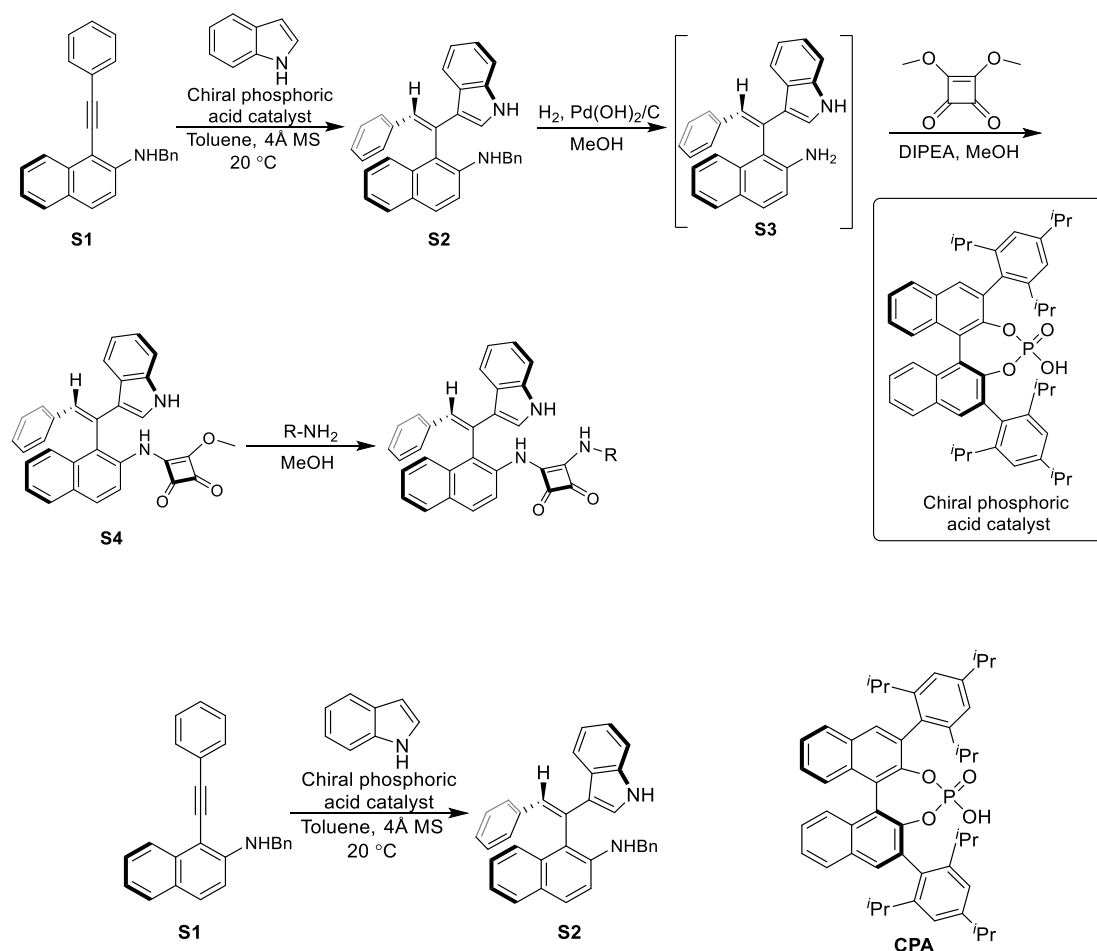

To a solution of **S1** (3.2 g, 9.6 mmol, 1.0 eq), CPA (242.8 mg, 0.96 mmol, 0.1 eq) and 4Å MS (4.8 g) in toluene (96 mL), indole (1.7 g, 14.4 mmol, 1.5 eq) was added in one portion at 20 °C and monitored by TLC. After stirring for 48 h, the mixture was directly purified through flash column chromatography on silica gel to give the pure product **S2**.<sup>5</sup>

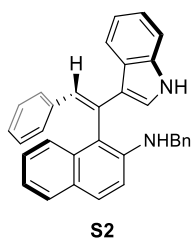

3.8 g, 89% yield, yellow foam.  $[\alpha]_D^{20} -152.40$  (c 0.5,  $CHCl_3$ )

$^1H$  NMR (400 MHz,  $CDCl_3$ )  $\delta$  8.15 (m, 8.20 – 8.11, 1H), 7.93 (s, 1H), 7.75 – 7.69 (m, 1H), 7.72 – 7.67 (m, 1H), 7.67 (dd,  $J = 8.4, 1.2$  Hz, 1H), 7.65 (s, 1H), 7.38 – 7.31 (m, 1H), 7.25 (m, 7.28 – 7.24, 2H), 7.24 – 7.12 (m, 2H), 7.13 – 7.06 (m, 2H), 7.09 – 6.98 (m, 7H), 6.88 – 6.83 (m, 2H), 6.59 (d,  $J = 2.7$  Hz, 1H), 4.81 (t,  $J = 6.3$  Hz, 1H), 4.37 – 4.22 (m, 2H).  $^{13}C$  NMR (101 MHz,  $CDCl_3$ )  $\delta$  141.9, 139.7, 137.5, 137.3, 133.1, 131.4, 128.9, 128.4, 128.3, 128.2, 127.9, 127.9, 127.4, 126.9, 126.8, 126.6, 126.6, 125.6, 125.3, 124.5, 122.5, 121.9, 120.9, 120.7, 118.5, 118.1, 114.1, 111.7, 47.8.

HRMS: calculated for  $C_{33}H_{27}N_2^+$   $[M+H]^+$  451.2169, found 451.2175.

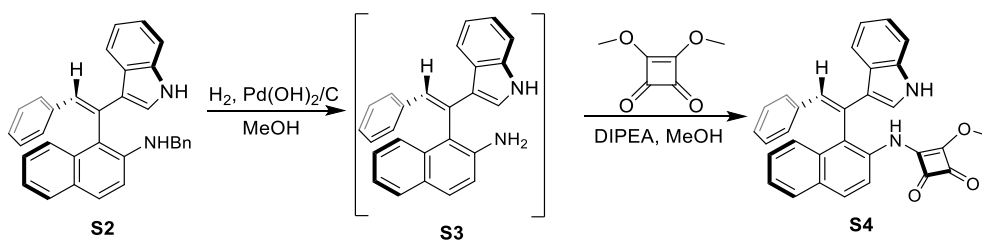

**S2** (900 mg, 2.0 mmol, 93% ee), Pd(OH)<sub>2</sub>/C (90 mg) and MeOH (20 mL) was placed in a hydrogenation tube equipped with a stirring bar. The hydrogenation tube was then put into an autoclave. The system was filled and evacuated with hydrogen for 3 times. The autoclave was pressurized with hydrogen to 7.5 bar hydrogen pressure, and the reaction mixture was stirred at 50 °C for 24 h. After the completion of the reaction, the mixture was filtered and the solvent was evaporated to afford the crude product **S3**.

To a flame-dried round bottom flask equipped with a stir bar, **S3** (235 mg, 0.5 mmol, 99% ee), *N,N'*-dimethylethane-1,2-diamine (183 mg, 0.62 mmol), DIPEA (26 μL, 0.25 mmol) and MeOH/CH<sub>2</sub>Cl<sub>2</sub> (4:1, 5.0 mL) was added and the mixture was stirred at 50 °C for 4 h. After the completion of the reaction, the mixture was filtered and the solid was purified through flash chromatography on silica gel eluted with PE/EA to afford Cat. **II** 250 mg (95% yield) as a white solid.<sup>5</sup>

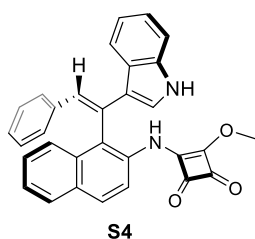

250 mg, 95% yield, white solid.  $[\alpha]_D^{20}$  -204.00 (c 0.5, DMSO)

<sup>1</sup>H NMR (400 MHz, DMSO) δ 11.19 (d, *J* = 1.6, 1H), 10.42 (s, 1H), 7.99 (dd, *J* = 13.8, 8.5 Hz, 2H), 7.77 (dd, *J* = 16.1, 8.2 Hz, 2H), 7.54 (s, 1H), 7.50 – 7.38 (m, 3H), 7.34 (t, *J* = 7.4 Hz, 1H), 7.14 (t, *J* = 7.5 Hz, 1H), 7.05 (t, *J* = 7.5 Hz, 1H), 7.02 – 6.92 (m, 3H), 6.85 – 6.78 (m, 2H), 6.74 (d, *J* = 2.5 Hz, 1H), 4.10 (s, 3H). <sup>13</sup>C NMR (101 MHz, DMSO) δ 188.0, 183.9, 177.7, 170.4, 137.5, 137.1, 132.5, 131.8, 131.6, 130.5, 130.1, 128.3, 128.2, 127.9, 127.8, 126.9, 126.4, 126.1, 126.1, 125.7, 124.7, 123.9, 121.6, 120.1, 119.8, 117.4, 112.0, 59.9.

**HRMS**: calculated for C<sub>31</sub>H<sub>22</sub>N<sub>2</sub>NaO<sub>3</sub><sup>+</sup> [M+Na<sup>+</sup>] 493.1523, found 493.1520.

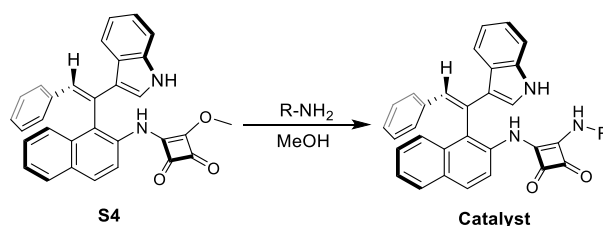

To a flame-dried round bottom flask equipped with a stir bar, **S4** (47 mg, 0.1 mmol, 99% ee), R-NH<sub>2</sub> (0.12 mmol) and MeOH (1.0 mL) was added and the mixture was stirred at 60 °C for 4 h. After the completion of the reaction, the mixture was filtered and the solid was purified through

flash chromatography on silica gel eluted with DCM/MeOH to afford catalyst. <sup>5</sup>

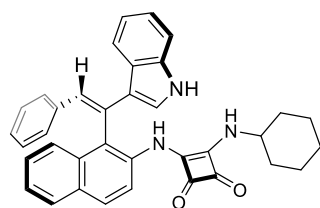

Cat. I

51 mg, 92% yield, yellow soild.  $[\alpha]_D^{20}$  29.60 (c 0.5, DMSO)

**<sup>1</sup>H NMR** (400 MHz, DMSO)  $\delta$  11.24 (s, 1H), 8.86 (s, 1H), 8.06 – 7.95 (d,  $J$  = 8.8 Hz, 2H), 7.92 (d,  $J$  = 8.1 Hz, 1H), 7.82 – 7.68 (m, 3H), 7.61 (s, 1H), 7.41 (d,  $J$  = 8.0 Hz, 1H), 7.36 (t,  $J$  = 7.3 Hz, 1H), 7.28 (t,  $J$  = 7.5 Hz, 1H), 7.15 (t,  $J$  = 7.5 Hz, 1H), 7.07 (t,  $J$  = 7.5 Hz, 1H), 7.02 – 6.95 (m, 3H), 6.94 – 6.89 (m, 2H), 6.86 (s, 1H), 3.76 (s, 1H), 1.96 – 1.77 (m, 2H), 1.65 (d,  $J$  = 15.1 Hz, 2H), 1.54 (d,  $J$  = 11.2 Hz, 1H), 1.36 – 1.03 (m, 5H).

**<sup>13</sup>C NMR** (101 MHz, DMSO)  $\delta$  184.3, 179.9, 168.2, 164.1, 137.2, 133.6, 131.5, 130.6, 130.3, 128.2, 128.0, 127.7, 126.8, 126.7, 126.4, 126.0, 125.7, 125.0, 124.8, 124.8, 122.4, 121.7, 120.1, 119.9, 117.2, 112.2, 54.9, 52.5, 34.0, 33.6, 24.7, 24.3.

**HRMS**: calculated for  $C_{36}H_{31}N_3NaO_2^+$   $[M+Na^+]$  560.2308, found 560.2305.

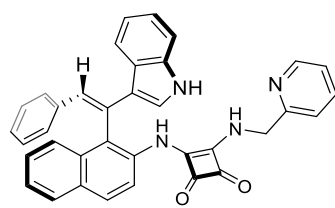

Cat. II

38 mg, 67% yield, yellow soild.  $[\alpha]_D^{20}$  46.40 (c 0.5, DMSO)

**<sup>1</sup>H NMR** (400 MHz, DMSO)  $\delta$  11.23 (s, 1H), 9.12 (s, 1H), 8.64 (t,  $J$  = 5.6 Hz, 1H), 8.53 (d,  $J$  = 3.8 Hz, 1H), 8.00 (d,  $J$  = 8.9 Hz, 1H), 7.92 (d,  $J$  = 8.0 Hz, 1H), 7.87 – 7.74 (m, 3H), 7.71 (d,  $J$  = 8.4 Hz, 1H), 7.61 (s, 1H), 7.41 (d,  $J$  = 8.0 Hz, 1H), 7.37 (t,  $J$  = 7.4 Hz, 1H), 7.32 – 7.26 (m, 3H), 7.15 (t,  $J$  = 7.2 Hz, 1H), 7.07 (t,  $J$  = 7.4 Hz, 1H), 6.98 – 6.93 (m, 3H), 6.93 – 6.86 (m, 2H), 6.83 (d,  $J$  = 1.8 Hz, 1H), 4.93 – 4.69 (m, 2H). **<sup>13</sup>C NMR** (101 MHz, DMSO)  $\delta$  184.6, 180.3, 168.9, 164.3, 157.2, 149.2, 137.3, 133.5, 131.5, 130.6, 128.0, 127.7, 126.8, 126.4, 125.7, 124.9, 122.7, 121.7, 120.1, 119.9, 117.1, 112.2, 64.9, 48.2, 15.2.

**HRMS**: calculated for  $C_{36}H_{26}N_4NaO_2^+$   $[M+Na^+]$  569.1948, found 569.1942.

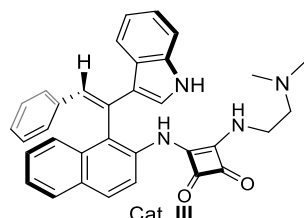

Cat. III

46 mg, 87% yield, yellow soild.  $[\alpha]_D^{20}$  120.00 (c 0.5, DMSO)

**<sup>1</sup>H NMR** (400 MHz, DMSO)  $\delta$  11.24 (s, 1H), 9.14 (s, 1H), 8.16 – 8.05 (m, 1H), 8.00 (d,  $J$  = 9.0 Hz, 1H), 7.93 (d,  $J$  = 8.0 Hz, 1H), 7.86 (d,  $J$  = 8.0 Hz, 1H), 7.75 (dd,  $J$  = 15.2, 8.7 Hz, 2H), 7.64 (s, 1H), 7.42 (d,  $J$  = 8.0 Hz, 1H), 7.37 (t,  $J$  = 7.1 Hz, 1H), 7.29 (t,  $J$  = 7.2 Hz, 1H), 7.16 (t,  $J$  = 7.3 Hz, 1H),

7.09 (t,  $J = 7.2$  Hz, 1H), 7.04 – 6.97 (m, 3H), 6.96 – 6.91 (m, 2H), 6.83 (s, 1H), 3.70 – 3.53 (m, 2H), 2.35 (t,  $J = 5.7$  Hz, 2H), 2.11 (s, 6H).  $^{13}\text{C NMR}$  (101 MHz, DMSO)  $\delta$  185.3, 180.6, 169.4, 164.6, 137.8, 137.7, 134.1, 131.9, 131.0, 130.8, 128.6, 128.5, 128.5, 128.2, 127.2, 127.1, 126.8, 126.6, 126.2, 125.4, 125.3, 125.2, 122.9, 122.2, 120.7, 120.4, 117.5, 112.6, 59.8, 45.5, 41.6.

**HRMS:** calculated for  $\text{C}_{34}\text{H}_{31}\text{N}_4\text{O}_2^+$  [ $\text{M}+\text{H}^+$ ] 527.2442, found 527.2436.

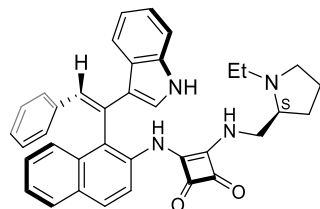

Cat. IV

54 mg, 95% yield, yellow solid.  $[\alpha]_{\text{D}}^{20}$  28.80 (c 0.5, DMSO)

$^1\text{H NMR}$  (400 MHz, DMSO)  $\delta$  11.25 (s, 1H), 9.08 (s, 1H), 8.01 (d,  $J = 8.9$  Hz, 2H), 7.94 (d,  $J = 8.0$  Hz, 1H), 7.85 (d,  $J = 8.0$  Hz, 1H), 7.81 (d,  $J = 8.9$  Hz, 1H), 7.75 (d,  $J = 8.4$  Hz, 1H), 7.65 (s, 1H), 7.43 (d,  $J = 8.0$  Hz, 1H), 7.38 (t,  $J = 7.4$  Hz, 1H), 7.33 – 7.27 (m, 1H), 7.17 (t,  $J = 7.2$  Hz, 1H), 7.10 (t,  $J = 7.3$  Hz, 1H), 7.02 – 6.98 (m, 3H), 6.97 – 6.93 (m, 2H), 6.84 (s, 1H), 3.69 – 3.57 (m, 1H), 3.48–3.40 (m, 1H), 2.91 (t,  $J = 6.8$  Hz, 1H), 2.80 – 2.68 (m, 1H), 2.51 – 2.44 (m, 1H), 2.25 – 2.14 (m, 1H), 2.07 (q,  $J = 8.9$  Hz, 1H), 1.79 – 1.66 (m, 1H), 1.58 – 1.35 (m, 3H), 0.95 (t,  $J = 7.1$  Hz, 3H).  $^{13}\text{C NMR}$  (101 MHz, DMSO)  $\delta$  184.7, 180.1, 169.4, 164.1, 137.3, 137.2, 133.7, 131.4, 130.6, 130.3, 128.2, 128.0, 127.8, 126.7, 126.4, 126.1, 125.7, 125.0, 124.8, 124.7, 122.4, 121.7, 120.1, 119.9, 117.1, 112.1, 63.3, 53.1, 48.1, 46.4, 27.7, 22.6, 13.6.

**HRMS:** calculated for  $\text{C}_{37}\text{H}_{35}\text{N}_4\text{O}_2^+$  [ $\text{M}+\text{H}^+$ ] 567.2755, found 567.2748.

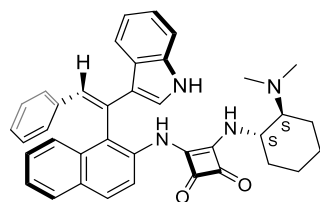

Cat. V

49 mg, 85% yield, yellow solid.  $[\alpha]_{\text{D}}^{20}$  63.60 (c 0.5, DMSO)

$^1\text{H NMR}$  (400 MHz, DMSO)  $\delta$  11.24 (s, 1H), 9.14 (s, 1H), 8.16 – 8.05 (m, 1H), 8.00 (d,  $J = 9.0$  Hz, 1H), 7.93 (d,  $J = 8.0$  Hz, 1H), 7.86 (d,  $J = 8.0$  Hz, 1H), 7.75 (dd,  $J = 15.2, 8.7$  Hz, 2H), 7.64 (s, 1H), 7.42 (d,  $J = 8.0$  Hz, 1H), 7.37 (t,  $J = 7.1$  Hz, 1H), 7.29 (t,  $J = 7.2$  Hz, 1H), 7.16 (t,  $J = 7.3$  Hz, 1H), 7.09 (t,  $J = 7.2$  Hz, 1H), 7.04 – 6.97 (m, 3H), 6.96 – 6.91 (m, 2H), 6.83 (s, 1H), 3.70 – 3.53 (m, 2H), 2.35 (t,  $J = 5.7$  Hz, 2H), 2.11 (s, 6H).  $^{13}\text{C NMR}$  (101 MHz, DMSO)  $\delta$  185.3, 180.6, 169.4, 164.6, 137.8, 137.7, 134.1, 131.9, 131.0, 130.8, 128.6, 128.5, 128.5, 128.2, 127.2, 127.1, 126.8, 126.6, 126.2, 125.4, 125.3, 125.2, 122.9, 122.2, 120.7, 120.4, 117.5, 112.6, 59.8, 45.5, 41.6.

**HRMS:** calculated for  $\text{C}_{38}\text{H}_{37}\text{N}_4\text{O}_2^+$  [ $\text{M}+\text{H}^+$ ] 581.2911, found 581.2918.

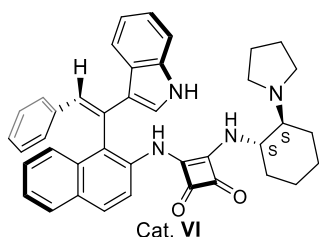

52 mg, 86% yield, yellow solid.  $[\alpha]_D^{20}$  43.60 (c 0.5, DMSO)

**<sup>1</sup>H NMR** (400 MHz, DMSO)  $\delta$  11.25 (s, 1H), 8.91 (s, 1H), 7.95 (dd,  $J = 24.3, 8.4$  Hz, 3H), 7.84 – 7.68 (m, 3H), 7.60 (s, 1H), 7.40 (d,  $J = 8.0$  Hz, 1H), 7.36 (t,  $J = 7.2$ , 1H), 7.28 (t,  $J = 7.6$ , 1H), 7.14 (t,  $J = 7.2$ , 1H), 7.06 (t,  $J = 7.2$ , 1H), 6.96 (s, 3H), 6.93 – 6.88 (m, 2H), 6.86 (s, 1H), 3.92 (s, 1H), 2.40 – 2.21 (m, 3H), 1.91 (s, 1H), 1.76 – 1.54 (m, 4H), 1.44 (s, 4H), 1.34 – 1.02 (m, 6H). **<sup>13</sup>C NMR** (101 MHz, DMSO)  $\delta$  184.3, 179.7, 168.8, 163.8, 137.2, 133.6, 131.6, 130.5, 130.2, 128.2, 128.0, 127.7, 127.0, 126.6, 126.4, 125.9, 125.6, 125.0, 124.8, 122.4, 121.7, 120.1, 119.8, 117.3, 112.1, 62.3, 54.9, 47.5, 33.0, 23.7, 23.2.

**HRMS**: calculated for  $C_{40}H_{39}N_4O_2^+$   $[M+H^+]$  607.3068, found 607.3060.

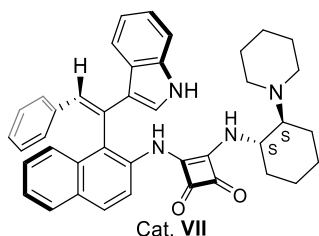

48 mg, 77% yield, yellow solid.  $[\alpha]_D^{20}$  138.80 (c 0.5, DMSO)

**<sup>1</sup>H NMR** (400 MHz, DMSO)  $\delta$  11.21 (s, 1H), 8.80 (s, 1H), 7.99 (d,  $J = 9.0$  Hz, 1H), 7.92 (d,  $J = 8.1$  Hz, 1H), 7.89 – 7.75 (m, 3H), 7.71 (d,  $J = 8.4$  Hz, 1H), 7.62 (s, 1H), 7.41 – 7.32 (m, 2H), 7.28 (t,  $J = 7.5$  Hz, 1H), 7.13 (t,  $J = 7.4$  Hz, 1H), 7.07 (t,  $J = 7.4$  Hz, 1H), 7.02 – 6.95 (m, 3H), 6.94 – 6.89 (m, 2H), 6.81 (d,  $J = 2.2$  Hz, 1H), 3.96 – 3.77 (m, 1H), 2.45 (s, 2H), 2.06 (s, 3H), 1.99 – 1.89 (m, 1H), 1.83 – 1.52 (m, 4H), 1.32 – 0.92 (m, 11H). **<sup>13</sup>C NMR** (101 MHz, DMSO)  $\delta$  184.6, 179.8, 169.5, 163.5, 137.3, 133.7, 131.4, 130.5, 130.3, 128.2, 128.0, 127.8, 126.7, 126.3, 125.8, 124.9, 124.8, 124.7, 121.6, 120.1, 119.8, 116.9, 112.1, 68.4, 54.9, 54.1, 49.3, 34.1, 26.1, 24.8, 24.6, 24.4, 23.6.

**HRMS**: calculated for  $C_{41}H_{41}N_4O_2^+$   $[M+H^+]$  621.3224, found 621.3212.

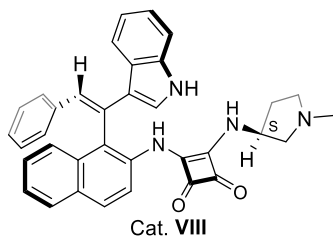

48 mg, 89% yield, yellow solid.  $[\alpha]_D^{20}$  114.40 (c 0.5, DMSO)

**<sup>1</sup>H NMR** (400 MHz, DMSO)  $\delta$  11.25 (s, 1H), 9.05 (s, 1H), 8.37 (d,  $J = 8.7$  Hz, 1H), 7.99 (d,  $J = 9.0$  Hz, 1H), 7.92 (d,  $J = 8.0$  Hz, 1H), 7.84 (d,  $J = 8.0$  Hz, 1H), 7.78 (d,  $J = 8.9$  Hz, 1H), 7.73 (d,  $J = 8.4$  Hz, 1H), 7.64 (s, 1H), 7.42 (d,  $J = 8.1$  Hz, 1H), 7.36 (t,  $J = 7.3$  Hz, 1H), 7.28 (t,  $J = 7.4$  Hz, 1H), 7.16 (t,  $J = 7.4$  Hz, 1H), 7.09 (t,  $J = 7.4$  Hz, 1H), 7.02 – 6.96 (m, 3H), 6.95 – 6.91 (m, 2H), 6.84 (s, 1H), 4.64 – 4.45 (m, 1H), 2.82 – 2.71 (m, 1H), 2.52 – 2.48 (m, 1H), 2.32 (dd,  $J = 9.6, 6.0$  Hz, 1H),

2.27 – 2.21 (m, 1H), 2.18 (s, 3H), 2.08 (q,  $J = 8.4$  Hz, 1H), 1.64 – 1.54 (m, 1H).  $^{13}\text{C}$  NMR (101 MHz, DMSO)  $\delta$  184.6, 180.0, 167.8, 163.9, 137.3, 133.6, 131.5, 130.6, 130.3, 128.2, 128.1, 127.7, 126.7, 126.4, 126.0, 125.7, 125.0, 124.9, 124.7, 122.3, 121.7, 120.2, 120.0, 117.1, 112.2, 62.8, 54.3, 53.4, 41.2, 33.5.

**HRMS:** calculated for  $\text{C}_{35}\text{H}_{31}\text{N}_4\text{O}_2^+$   $[\text{M}+\text{H}^+]$  539.2442, found 539.2433.

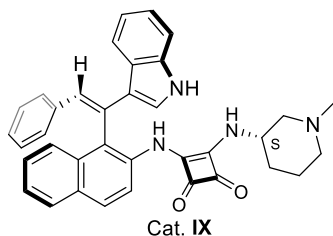

43 mg, 78% yield, yellow solid.  $[\alpha]_D^{20}$  64.00 (c 0.5, DMSO)

$^1\text{H}$  NMR (400 MHz, DMSO)  $\delta$  11.25 (d,  $J = 2.0$  Hz, 1H), 9.18 (s, 1H), 8.19 (d,  $J = 8.4$  Hz, 1H), 7.98 (d,  $J = 9.0$  Hz, 1H), 7.92 (d,  $J = 8.0$  Hz, 1H), 7.80 (d,  $J = 8.0$  Hz, 1H), 7.72 (dd,  $J = 15.4, 8.7$  Hz, 2H), 7.62 (s, 1H), 7.42 (d,  $J = 8.0$  Hz, 1H), 7.37 (t,  $J = 7.3$  Hz, 1H), 7.28 (t,  $J = 7.4$  Hz, 1H), 7.15 (t,  $J = 7.4$  Hz, 1H), 7.08 (t,  $J = 7.5$  Hz, 1H), 7.01 – 6.95 (m, 3H), 6.94 – 6.89 (m, 2H), 6.87 (d,  $J = 2.5$  Hz, 1H), 4.15 (s, 1H), 2.46 – 2.35 (m, 1H), 2.34 – 2.13 (m, 3H), 2.09 (s, 3H), 1.72 – 1.57 (m, 2H), 1.53 – 1.33 (m, 2H).  $^{13}\text{C}$  NMR (101 MHz, DMSO)  $\delta$  184.4, 180.2, 168.1, 164.3, 137.3, 137.2, 133.6, 131.5, 130.7, 130.3, 128.1, 128.0, 127.7, 126.8, 126.6, 126.4, 126.3, 125.7, 125.1, 124.9, 124.8, 122.8, 121.7, 120.1, 119.9, 117.3, 112.2, 60.1, 54.9, 49.4, 46.0, 30.2, 21.5.

**HRMS:** calculated for  $\text{C}_{36}\text{H}_{33}\text{N}_4\text{O}_2^+$   $[\text{M}+\text{H}^+]$  553.2598, found 553.2595.

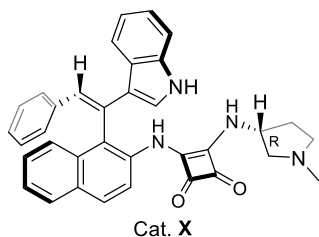

46 mg, 85% yield, yellow solid.  $[\alpha]_D^{20}$  35.60 (c 0.5, DMSO)

$^1\text{H}$  NMR (400 MHz, DMSO)  $\delta$  11.22 (s, 1H), 9.02 (s, 1H), 8.33 (d,  $J = 8.6$  Hz, 1H), 7.99 (d,  $J = 9.0$  Hz, 1H), 7.92 (d,  $J = 8.0$  Hz, 1H), 7.82 (d,  $J = 8.0$  Hz, 1H), 7.73 (dd,  $J = 16.3, 8.7$  Hz, 3H), 7.62 (s, 1H), 7.40 (d,  $J = 8.0$  Hz, 1H), 7.38 – 7.34 (m, 1H), 7.28 (t,  $J = 7.4$  Hz, 1H), 7.15 (t,  $J = 7.5$  Hz, 2H), 7.07 (t,  $J = 7.4$  Hz, 1H), 6.99 (d,  $J = 7.0$  Hz, 4H), 7.01 – 6.96 (m, 2H), 6.82 (s, 1H), 4.62 – 4.46 (m, qH), 2.76 – 2.68 (m, 1H), 2.57 (d,  $J = 9.3$  Hz, 1H), 2.42 – 2.35 (m, 1H), 2.22 (s, 3H), 2.18 (s, 1H), 2.08 (q,  $J = 8.0$  Hz, 1H).  $^{13}\text{C}$  NMR (101 MHz, DMSO)  $\delta$  184.5, 179.9, 167.8, 163.9, 137.2, 133.6, 131.4, 130.6, 130.3, 128.1, 127.7, 126.7, 126.4, 125.7, 124.9, 124.7, 122.3, 121.7, 120.1, 119.9, 117.1, 112.2, 63.0, 54.3, 53.4, 41.3, 33.3.

**HRMS:** calculated for  $\text{C}_{35}\text{H}_{31}\text{N}_4\text{O}_2^+$   $[\text{M}+\text{H}^+]$  539.2442, found 539.2440.

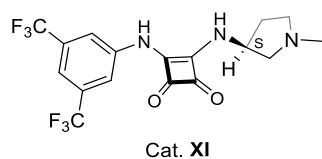



39 mg, 95% yield, white solid.  $[\alpha]_D^{20}$  11.60 (c 0.5, DMSO)

**$^1\text{H}$  NMR** (400 MHz,  $\text{CDCl}_3$ )  $\delta$  13.36 (s, 1H), 8.37 (s, 1H), 8.11 – 7.81 (m, 2H), 7.49 (s, 1H), 4.63 – 4.27 (m, 1H), 3.33 – 3.17 (m, 1H), 3.14 (d,  $J = 11.1$  Hz, 1H), 2.72 – 2.63 (m, 1H), 2.56 (s, 3H), 2.49 – 2.20 (m, 2H), 1.99 – 1.89 (m, 1H).  **$^{13}\text{C}$  NMR** (101 MHz,  $\text{CDCl}_3$ )  $\delta$  186.8, 180.6, 167.5, 164.6, 140.9, 132.7 (q,  $J_{CF} = 33.5$  Hz), 127.2, 124.5, 121.8, 119.0, 115.9, 62.0, 55.2, 52.8, 40.9, 34.7.

**HRMS**: calculated for  $\text{C}_{17}\text{H}_{16}\text{F}_6\text{N}_3\text{O}_2^+$   $[\text{M}+\text{H}^+]$  408.1141, found 408.1138.

## 4. X-ray structure

### Crystal data and structure refinement for Cat. VIII.

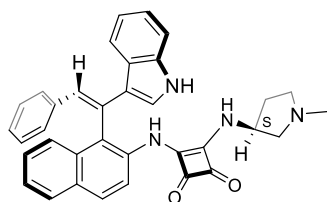

Cat. VIII

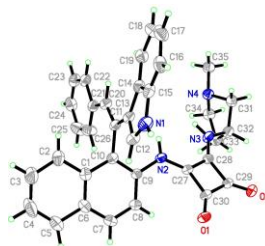

X-ray structure of cat. VIII (CCDC 2251865)

|                                   |                                                               |
|-----------------------------------|---------------------------------------------------------------|
| Identification code               | a_a                                                           |
| Empirical formula                 | C <sub>36</sub> H <sub>34</sub> N <sub>4</sub> O <sub>3</sub> |
| Formula weight                    | 570.67                                                        |
| Temperature                       | 173(2) K                                                      |
| Wavelength                        | 1.54178 Å                                                     |
| Crystal system                    | Tetragonal                                                    |
| Space group                       | P4 <sub>3</sub>                                               |
| Unit cell dimensions              | a = 11.977(5) Å<br>b = 11.977 Å<br>c = 42.045(13) Å           |
| Volume                            | 6031(5) Å <sup>3</sup>                                        |
| Z                                 | 8                                                             |
| Density (calculated)              | 1.257 Mg/m <sup>3</sup>                                       |
| Absorption coefficient            | 0.645 mm <sup>-1</sup>                                        |
| F(000)                            | 2416                                                          |
| Crystal size                      | 0.160 x 0.150 x 0.140 mm <sup>3</sup>                         |
| Theta range for data collection   | 3.690 to 67.142°.                                             |
| Index ranges                      | -13 ≤ h ≤ 14, -14 ≤ k ≤ 13, -50 ≤ l ≤ 48                      |
| Reflections collected             | 61410                                                         |
| Independent reflections           | 10685 [R(int) = 0.0898]                                       |
| Completeness to theta = 67.142°   | 99.7 %                                                        |
| Absorption correction             | Semi-empirical from equivalents                               |
| Max. and min. transmission        | 0.7528 and 0.6348                                             |
| Refinement method                 | Full-matrix least-squares on F <sup>2</sup>                   |
| Data / restraints / parameters    | 10685 / 3 / 794                                               |
| Goodness-of-fit on F <sup>2</sup> | 1.029                                                         |
| Final R indices [I > 2σ(I)]       | R1 = 0.0488, wR2 = 0.1268                                     |
| R indices (all data)              | R1 = 0.0656, wR2 = 0.1399                                     |
| Absolute structure parameter      | -0.14(13)                                                     |

|                             |                                    |
|-----------------------------|------------------------------------|
| Extinction coefficient      | n/a                                |
| Largest diff. peak and hole | 0.599 and -0.344 e.Å <sup>-3</sup> |

### Crystal data and structure refinement for 3aa.

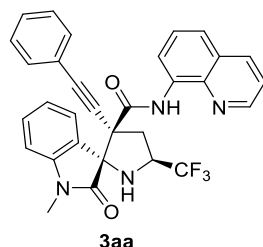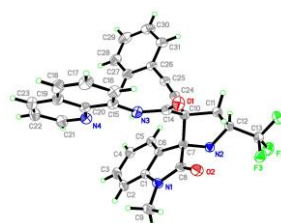

X-ray structure of **3aa** (CCDC 2025863)

|                                   |                                                                                                                  |
|-----------------------------------|------------------------------------------------------------------------------------------------------------------|
| Empirical formula                 | C <sub>31</sub> H <sub>23</sub> F <sub>3</sub> N <sub>4</sub> O <sub>2</sub>                                     |
| Formula weight                    | 540.53                                                                                                           |
| Temperature                       | 297(2) K                                                                                                         |
| Wavelength                        | 1.54178 Å                                                                                                        |
| Crystal system, space group       | Orthorhombic, P2(1)2(1)2(1)                                                                                      |
| Unit cell dimensions              | a = 10.5810(3) Å    alpha = 90 deg.<br>b = 12.0311(3) Å    beta = 90 deg.<br>c = 20.7727(5) Å    gamma = 90 deg. |
| Volume                            | 2644.39(12) Å <sup>3</sup>                                                                                       |
| Z, Calculated density             | 4, 1.358 Mg/m <sup>3</sup>                                                                                       |
| Absorption coefficient            | 0.846 mm <sup>-1</sup>                                                                                           |
| F(000)                            | 1120                                                                                                             |
| Crystal size                      | 0.200 x 0.180 x 0.150 mm                                                                                         |
| Theta range for data collection   | 4.246 to 72.395 deg                                                                                              |
| Limiting indices                  | -13 ≤ h ≤ 12, -14 ≤ k ≤ 14, -25 ≤ l ≤ 25                                                                         |
| Reflections collected / unique    | 31504 / 5208 [R(int) = 0.0341]                                                                                   |
| Completeness to theta = 67.679    | 99.6 %                                                                                                           |
| Refinement method                 | Full-matrix least-squares on F <sup>2</sup>                                                                      |
| Data / restraints / parameters    | 5208 / 0 / 370                                                                                                   |
| Goodness-of-fit on F <sup>2</sup> | 1.033                                                                                                            |
| Final R indices [I > 2σ(I)]       | R1 = 0.0330, wR2 = 0.0834                                                                                        |
| R indices (all data)              | R1 = 0.0379, wR2 = 0.0889                                                                                        |
| Absolute structure parameter      | 0.05(4)                                                                                                          |
| Extinction coefficient            | n/a                                                                                                              |
| Largest diff. peak and hole       | 0.105 and -0.126 e.Å <sup>-3</sup>                                                                               |

### Crystal data and structure refinement for **3ta**.

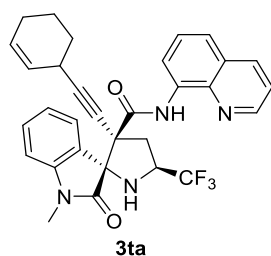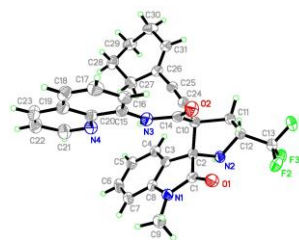

X-ray structure of **3ta** (CCDC 2251573)

|                                   |                                                                              |
|-----------------------------------|------------------------------------------------------------------------------|
| Identification code               | t_a                                                                          |
| Empirical formula                 | C <sub>31</sub> H <sub>27</sub> F <sub>3</sub> N <sub>4</sub> O <sub>2</sub> |
| Formula weight                    | 544.56                                                                       |
| Temperature                       | 173(2) K                                                                     |
| Wavelength                        | 1.54178 Å                                                                    |
| Crystal system                    | Orthorhombic                                                                 |
| Space group                       | P2 <sub>1</sub> 2 <sub>1</sub> 2 <sub>1</sub>                                |
| Unit cell dimensions              | a = 10.5678(2) Å<br>b = 11.8802(3) Å<br>c = 21.0636(4) Å                     |
| Volume                            | 2644.48(10) Å <sup>3</sup>                                                   |
| Z                                 | 4                                                                            |
| Density (calculated)              | 1.368 Mg/m <sup>3</sup>                                                      |
| Absorption coefficient            | 0.847 mm <sup>-1</sup>                                                       |
| F(000)                            | 1136                                                                         |
| Crystal size                      | 0.180 x 0.160 x 0.140 mm <sup>3</sup>                                        |
| Theta range for data collection   | 4.272 to 68.443°.                                                            |
| Index ranges                      | -12 ≤ h ≤ 12, -14 ≤ k ≤ 14, -25 ≤ l ≤ 25                                     |
| Reflections collected             | 31549                                                                        |
| Independent reflections           | 4856 [R(int) = 0.0426]                                                       |
| Completeness to theta = 67.679°   | 99.8 %                                                                       |
| Absorption correction             | Semi-empirical from equivalents                                              |
| Max. and min. transmission        | 0.7531 and 0.6409                                                            |
| Refinement method                 | Full-matrix least-squares on F <sup>2</sup>                                  |
| Data / restraints / parameters    | 4856 / 0 / 368                                                               |
| Goodness-of-fit on F <sup>2</sup> | 1.036                                                                        |
| Final R indices [I > 2σ(I)]       | R1 = 0.0293, wR2 = 0.0738                                                    |
| R indices (all data)              | R1 = 0.0320, wR2 = 0.0759                                                    |
| Absolute structure parameter      | -0.01(4)                                                                     |
| Extinction coefficient            | n/a                                                                          |
| Largest diff. peak and hole       | 0.177 and -0.166 e.Å <sup>-3</sup>                                           |

## 5. Theoretical calculations on the role of chiral organocatalysts

Figure S2: Proposed catalytic cycle.

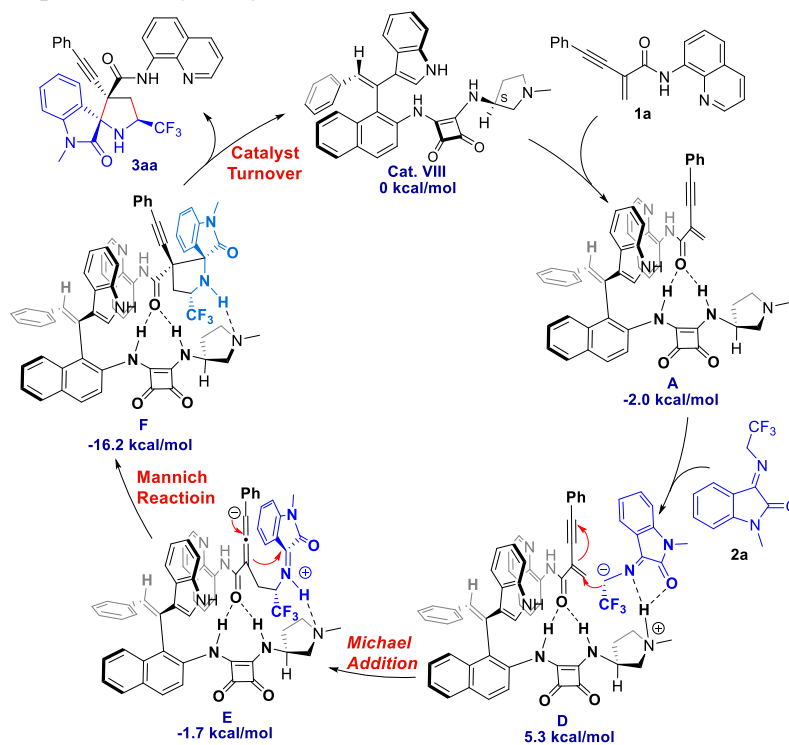

Figure S3: Visualization of noncovalent interactions in TS1 and TS2

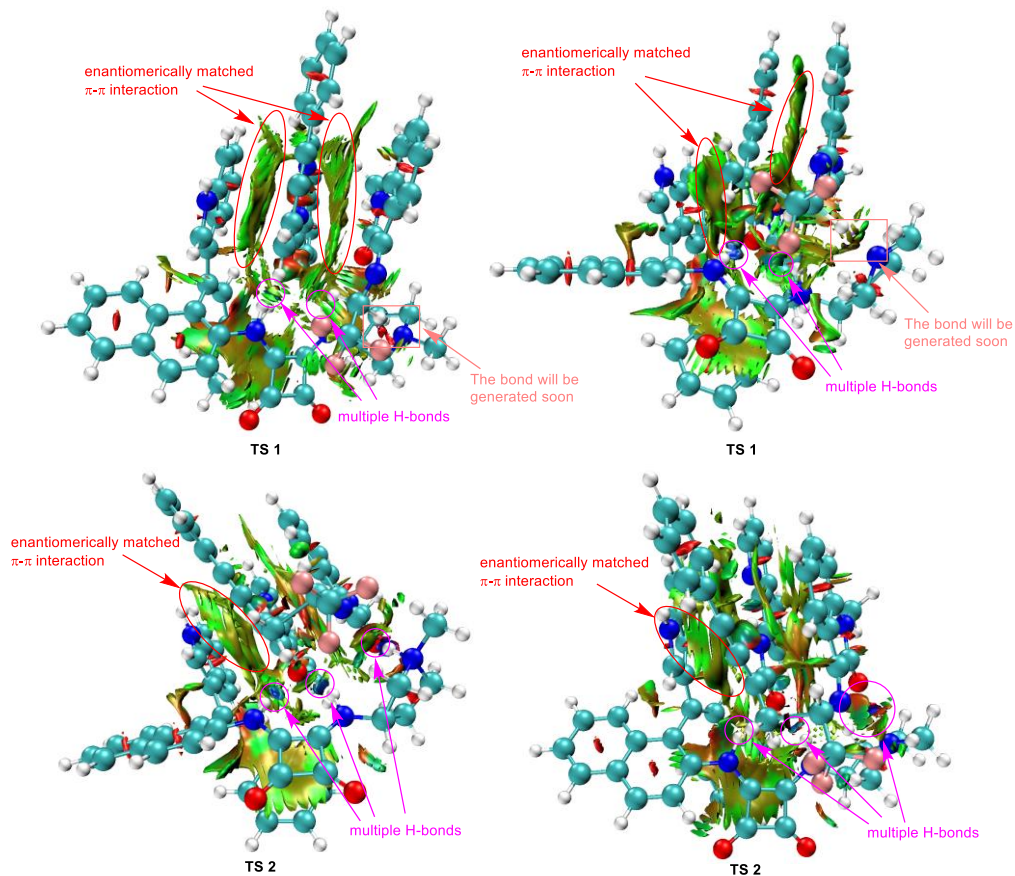

Figure S4: Proposed mechanistic DFT calculation of the reaction

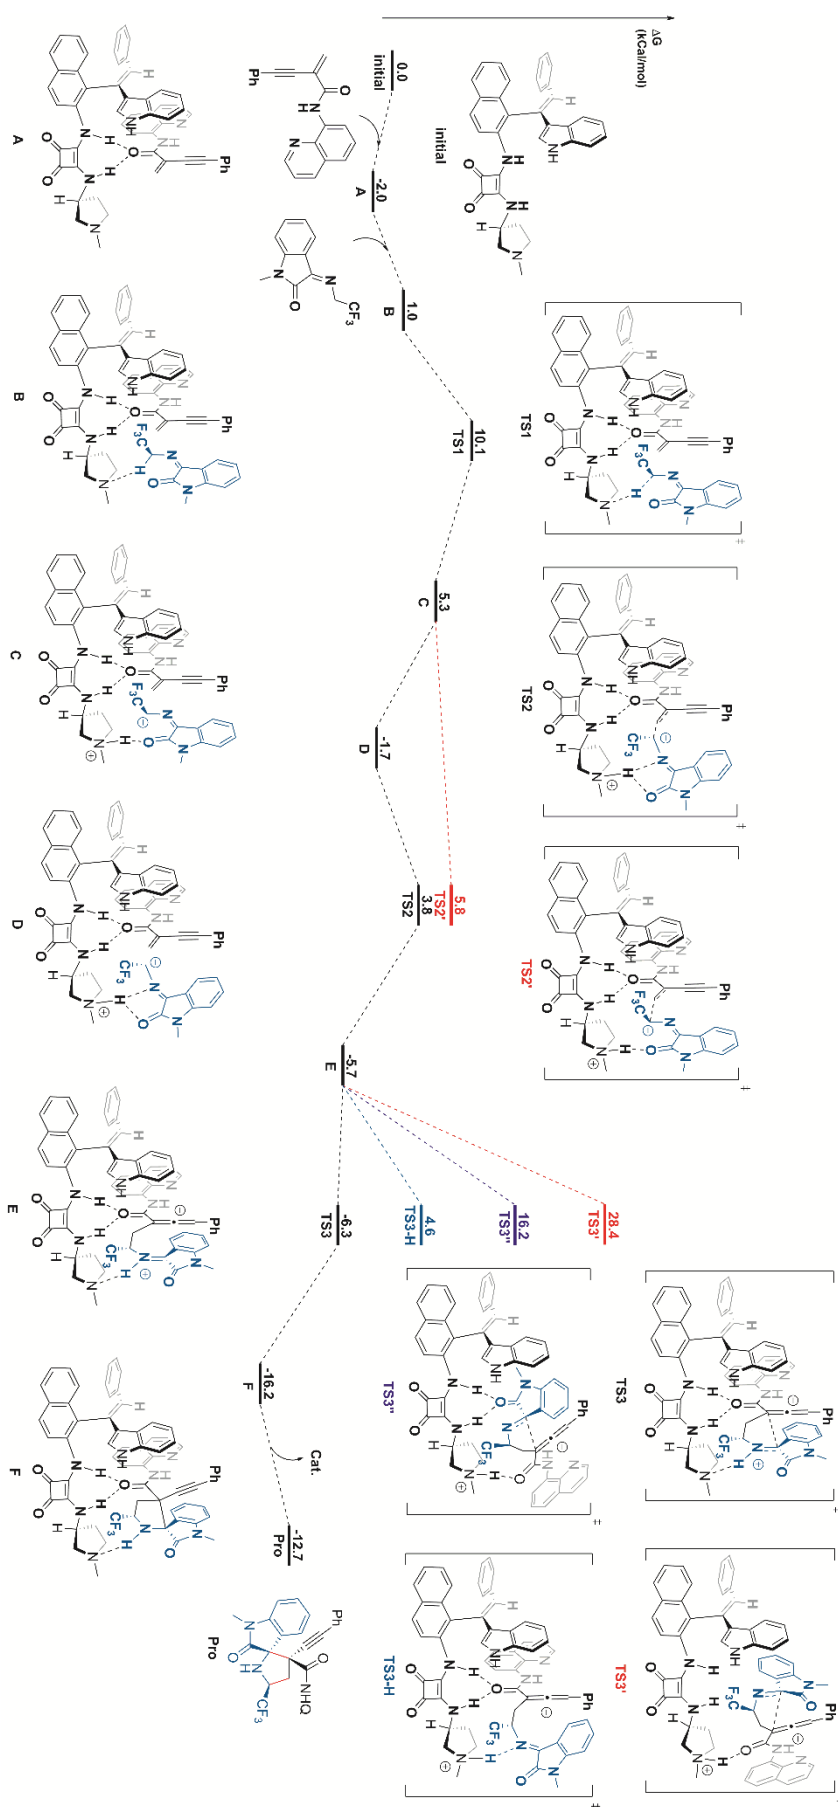

## Details of Computational Studies for Determination of the Mechanism

The M06-2X density functional<sup>6</sup> with 6-31G(d,p) basis set<sup>7</sup> was employed for the computational study. Vibrational frequency analyses were carried out at the same level to confirm all the optimized structures as minima (no imaginary frequency) or transition states (only one imaginary frequency), and provided the thermal relative Gibbs free energy correction. To verify that each transition state connects to its appropriate reactant and product, the intrinsic reaction coordinate (IRC) calculations<sup>8</sup> were employed. The solvent effect of dichloroethane in the reaction was evaluated using the SMD solvation model<sup>9</sup>. This model was used for single point energy calculations based on the gas phase optimized geometries at 6-311++G(d,p) basis set<sup>10, 11</sup>. For the purpose of discussion, the solvation Gibbs free energy was used and it was obtained from the addition of solvation single point energy and gas-phase thermal correction to Gibbs free energy. All calculations were carried out by Gaussian 16 program package<sup>7</sup>.

### Coordinates and Energies:

#### 1a

|                                              |                             |
|----------------------------------------------|-----------------------------|
| Zero-point correction=                       | 0.291102 (Hartree/Particle) |
| Thermal correction to Energy=                | 0.306604                    |
| Thermal correction to Enthalpy=              | 0.307469                    |
| Thermal correction to Gibbs Free Energy=     | 0.248103                    |
| Sum of electronic and zero-point Energies=   | -954.582546                 |
| Sum of electronic and thermal Energies=      | -954.567045                 |
| Sum of electronic and thermal Enthalpies=    | -954.566180                 |
| Sum of electronic and thermal Free Energies= | -954.625546                 |
| SCF Done: E(RM062X) =                        | -955.128819916              |

|   |             |             |             |
|---|-------------|-------------|-------------|
| C | -0.46645700 | 3.15097700  | -0.03793600 |
| C | -1.52591200 | 2.18999400  | -0.02812900 |
| C | -2.32926900 | 1.28208800  | -0.00845600 |
| C | -3.24520000 | 0.18284800  | 0.03925800  |
| C | -4.58840200 | 0.34206600  | -0.32522800 |
| C | -2.78276000 | -1.07357600 | 0.45955500  |
| C | -5.45468800 | -0.74323100 | -0.27085000 |
| H | -4.93893800 | 1.31604700  | -0.64909700 |
| C | -3.65750600 | -2.15123700 | 0.51170900  |
| H | -1.73812900 | -1.17976400 | 0.73752000  |
| C | -4.99299500 | -1.98970400 | 0.14630000  |
| H | -6.49419200 | -0.61587000 | -0.55445100 |
| H | -3.29827000 | -3.12065000 | 0.84289600  |
| H | -5.67353400 | -2.83381300 | 0.18818500  |
| C | 0.96287200  | 2.64361400  | 0.02477300  |

|   |             |             |             |
|---|-------------|-------------|-------------|
| O | 1.90663100  | 3.41187400  | 0.07852000  |
| N | 1.06382900  | 1.28374200  | 0.00823200  |
| H | 0.20982400  | 0.73763800  | -0.06115300 |
| C | 2.22274400  | 0.51375800  | 0.03394900  |
| C | 2.00905900  | -0.90371000 | -0.04821800 |
| C | 3.50797200  | 1.00514300  | 0.12531600  |
| C | 3.12374900  | -1.77930500 | -0.04358800 |
| C | 4.60453000  | 0.11110100  | 0.13589400  |
| H | 3.66551100  | 2.07235400  | 0.18466900  |
| C | 0.51888800  | -2.63888300 | -0.23342800 |
| C | 2.85236800  | -3.16638100 | -0.14302000 |
| C | 4.43380600  | -1.24591300 | 0.05314000  |
| H | 5.60468300  | 0.52568700  | 0.20908400  |
| C | 1.55684000  | -3.60032800 | -0.24220600 |
| H | -0.51951500 | -2.95800800 | -0.31252600 |
| H | 3.68179100  | -3.86838700 | -0.14235000 |
| H | 5.28274900  | -1.92243200 | 0.05786000  |
| H | 1.31560700  | -4.65383600 | -0.32470600 |
| N | 0.72589300  | -1.34643400 | -0.13595900 |
| C | -0.65606300 | 4.47362000  | -0.09488500 |
| H | 0.21006200  | 5.12593200  | -0.09330700 |
| H | -1.65019200 | 4.90130900  | -0.14037700 |

## 2a

|                                              |                             |
|----------------------------------------------|-----------------------------|
| Zero-point correction=                       | 0.191753 (Hartree/Particle) |
| Thermal correction to Energy=                | 0.204106                    |
| Thermal correction to Enthalpy=              | 0.204971                    |
| Thermal correction to Gibbs Free Energy=     | 0.153558                    |
| Sum of electronic and zero-point Energies=   | -908.333044                 |
| Sum of electronic and thermal Energies=      | -908.320691                 |
| Sum of electronic and thermal Enthalpies=    | -908.319826                 |
| Sum of electronic and thermal Free Energies= | -908.371239                 |
| SCF Done: E(RM062X) =                        | -908.802647265              |

|   |            |             |             |
|---|------------|-------------|-------------|
| C | 1.34851800 | -0.74782600 | -0.00000500 |
| C | 2.41780000 | 0.16018300  | 0.00000200  |
| C | 3.73407300 | -0.27007600 | 0.00000800  |
| C | 3.95419900 | -1.65161300 | 0.00000600  |
| C | 2.89922600 | -2.56341600 | -0.00000200 |
| C | 1.57746400 | -2.11273900 | -0.00000700 |
| C | 0.11090700 | 0.04010200  | -0.00000800 |
| C | 0.55955800 | 1.50459600  | -0.00000500 |
| H | 4.56188200 | 0.43064200  | 0.00001400  |



|   |             |             |             |
|---|-------------|-------------|-------------|
| H | 4.97522800  | -2.01930500 | 0.00001000  |
| H | 3.10865600  | -3.62709500 | -0.00000300 |
| H | 0.73799100  | -2.80024700 | -0.00001200 |
| N | 1.93515700  | 1.47844500  | 0.00000200  |
| O | -0.14410500 | 2.49331100  | -0.00000800 |
| N | -1.07222300 | -0.41223200 | -0.00001100 |
| C | -2.18705000 | 0.51429600  | -0.00001300 |
| H | -2.18304400 | 1.16678700  | 0.87906200  |
| H | -2.18305500 | 1.16676800  | -0.87910200 |
| C | -3.47071600 | -0.28059100 | 0.00000400  |
| F | -4.52545000 | 0.55000300  | 0.00000200  |
| F | -3.56950700 | -1.06342000 | 1.07995000  |
| F | -3.56952200 | -1.06344300 | -1.07992500 |
| C | 2.75739100  | 2.66518800  | 0.00000500  |
| H | 3.39024700  | 2.69561300  | 0.89190100  |
| H | 3.39025200  | 2.69561500  | -0.89188600 |
| H | 2.08623500  | 3.52436400  | 0.00000500  |

#### Initial/Cat. VIII

|                                              |                             |
|----------------------------------------------|-----------------------------|
| Zero-point correction=                       | 0.581945 (Hartree/Particle) |
| Thermal correction to Energy=                | 0.610631                    |
| Thermal correction to Enthalpy=              | 0.611496                    |
| Thermal correction to Gibbs Free Energy=     | 0.522116                    |
| Sum of electronic and zero-point Energies=   | -1719.974845                |
| Sum of electronic and thermal Energies=      | -1719.946159                |
| Sum of electronic and thermal Enthalpies=    | -1719.945294                |
| Sum of electronic and thermal Free Energies= | -1720.034674                |
| SCF Done: E(RM062X) =                        | -1721.02325728              |

|   |             |             |             |
|---|-------------|-------------|-------------|
| O | -1.92950000 | -3.95049300 | -2.06946800 |
| N | -4.82911900 | 2.34514100  | 0.47293700  |
| O | -4.72818400 | -2.24114500 | -2.32879600 |
| N | -0.47763200 | -1.09956300 | -0.87300800 |
| H | -0.43877400 | -0.10082300 | -0.70891200 |
| N | 4.15938500  | 1.36575900  | -2.39440500 |
| H | 4.69849500  | 1.18226300  | -3.22410100 |
| C | 4.86142800  | 4.68032600  | -0.89585300 |
| H | 5.44440500  | 5.58833500  | -1.00830300 |
| C | 4.98207300  | 3.67322900  | -1.83702700 |
| H | 5.65490300  | 3.76760500  | -2.68342600 |
| C | 4.21116100  | 2.52336100  | -1.64993700 |
| C | 3.31932600  | 2.36871200  | -0.56191800 |
| C | 2.72045300  | 1.05771400  | -0.69562000 |

|   |             |             |             |
|---|-------------|-------------|-------------|
| C | 1.71427600  | 0.40615800  | 0.15045500  |
| C | 1.71656600  | -1.08976500 | 0.10919400  |
| C | -1.68411600 | -1.57565000 | -1.27070200 |
| C | -4.70648600 | 0.68732600  | -1.14136200 |
| H | -5.06491000 | 0.31123500  | -2.10001800 |
| C | -4.87272900 | 2.19498300  | -0.97727500 |
| H | -4.07669100 | 2.76518400  | -1.46467500 |
| H | -5.84641900 | 2.51778900  | -1.39197800 |
| C | -5.12947200 | 3.68478200  | 0.93445600  |
| H | -5.08236600 | 3.71864500  | 2.02692900  |
| H | -6.13496100 | 4.01933500  | 0.62174400  |
| H | -4.39217000 | 4.38875900  | 0.53941100  |
| N | -3.28133700 | 0.36379300  | -1.04900900 |
| H | -2.80002500 | 0.82890700  | -0.28143800 |
| C | -5.77933300 | 1.33954600  | 0.95150400  |
| H | -6.81714700 | 1.69922200  | 0.82605800  |
| H | -5.62477600 | 1.13682700  | 2.01625100  |
| C | -5.52226200 | 0.11765700  | 0.04947800  |
| H | -6.45216200 | -0.34008000 | -0.29235600 |
| H | -4.94123900 | -0.65443400 | 0.56039400  |
| C | -3.60405000 | -2.03928000 | -1.93859200 |
| C | -2.28661600 | -2.82355900 | -1.83159600 |
| C | 0.70308500  | -3.21270200 | -0.55844300 |
| H | -0.12231000 | -3.74229400 | -1.02232600 |
| C | 1.79622400  | -3.89436700 | -0.10633400 |
| H | 1.83119500  | -4.97614500 | -0.19981400 |
| C | 4.01494600  | -3.93356700 | 0.99334900  |
| H | 4.02717600  | -5.01579200 | 0.89613100  |
| C | 5.05593200  | -3.27195000 | 1.59179000  |
| H | 5.90933800  | -3.82231900 | 1.97369900  |
| C | 5.01028100  | -1.86423400 | 1.71971700  |
| H | 5.82904100  | -1.34357800 | 2.20600400  |
| C | 3.94205100  | -1.14913400 | 1.23979900  |
| H | 3.91867000  | -0.06991100 | 1.35001900  |
| C | 2.85322700  | -1.80640100 | 0.60146600  |
| C | 0.81704900  | 1.14296900  | 0.84549700  |
| H | 0.83111900  | 2.21915300  | 0.68555300  |
| C | -0.26685100 | 0.65599800  | 1.71439800  |
| C | -0.17234100 | -0.51319800 | 2.48455600  |
| H | 0.75713100  | -1.07237900 | 2.49628000  |
| C | -1.25581700 | -0.95159300 | 3.23629800  |
| H | -1.16468100 | -1.85953900 | 3.82378000  |
| C | -2.45129100 | -0.23357500 | 3.24523200  |
| H | -3.29416500 | -0.58402800 | 3.83233700  |

|   |             |             |             |
|---|-------------|-------------|-------------|
| C | -2.54999100 | 0.94397200  | 2.50945000  |
| H | -3.46493400 | 1.52629600  | 2.50244700  |
| C | -1.46427300 | 1.38638400  | 1.75853400  |
| H | -1.54947300 | 2.31161700  | 1.19069000  |
| C | 4.00610000  | 4.53958600  | 0.21272800  |
| H | 3.95138500  | 5.33884700  | 0.94423900  |
| C | 3.24107100  | 3.39975400  | 0.38958700  |
| H | 2.60673900  | 3.29923200  | 1.26370700  |
| C | 3.28158500  | 0.49039400  | -1.81464800 |
| H | 3.10467100  | -0.48858000 | -2.23717300 |
| C | -2.88894000 | -0.88698600 | -1.35188000 |
| C | 0.65482500  | -1.79669600 | -0.44258400 |
| C | 2.89379400  | -3.22388700 | 0.49450700  |

## A

|                                              |                             |
|----------------------------------------------|-----------------------------|
| Zero-point correction=                       | 0.874441 (Hartree/Particle) |
| Thermal correction to Energy=                | 0.919717                    |
| Thermal correction to Enthalpy=              | 0.920582                    |
| Thermal correction to Gibbs Free Energy=     | 0.795486                    |
| Sum of electronic and zero-point Energies=   | -2674.595287                |
| Sum of electronic and thermal Energies=      | -2674.550012                |
| Sum of electronic and thermal Enthalpies=    | -2674.549147                |
| Sum of electronic and thermal Free Energies= | -2674.674242                |
| SCF Done: E(RM062X) =                        | -2676.18052241              |

|   |             |             |             |
|---|-------------|-------------|-------------|
| C | -1.47180600 | 0.63090900  | -2.19206700 |
| C | -2.82979800 | 1.07101800  | -2.28293900 |
| C | -4.00376500 | 1.37327400  | -2.24510800 |
| C | -5.38909200 | 1.71694100  | -2.13219200 |
| C | -6.06427500 | 2.37568100  | -3.16770300 |
| C | -6.07436100 | 1.38455100  | -0.95246000 |
| C | -7.40841500 | 2.69802300  | -3.02207500 |
| H | -5.52961200 | 2.62602700  | -4.07767900 |
| C | -7.41708500 | 1.71365100  | -0.81770900 |
| H | -5.53032500 | 0.87586500  | -0.16088300 |
| C | -8.08635900 | 2.36926600  | -1.85016200 |
| H | -7.92896300 | 3.20766900  | -3.82599300 |
| H | -7.94427000 | 1.46123200  | 0.09713600  |
| H | -9.13524300 | 2.62467300  | -1.74129100 |
| C | -1.10944800 | -0.31862100 | -1.07358300 |
| O | 0.05933400  | -0.64828100 | -0.87757600 |
| N | -2.15590900 | -0.77979000 | -0.35586800 |
| H | -3.08461400 | -0.42380400 | -0.57257900 |

|   |             |             |             |
|---|-------------|-------------|-------------|
| C | -2.11994900 | -1.60519100 | 0.76767100  |
| C | -3.39498600 | -1.84706000 | 1.37563800  |
| C | -0.98259400 | -2.15683800 | 1.31679500  |
| C | -3.46620500 | -2.62560000 | 2.55777800  |
| C | -1.07548000 | -2.92153000 | 2.50413900  |
| H | -0.03016400 | -2.00962100 | 0.82867700  |
| C | -5.66213400 | -1.50414100 | 1.34469400  |
| C | -4.74988400 | -2.81797800 | 3.12645200  |
| C | -2.27738700 | -3.15604500 | 3.12052000  |
| H | -0.16226100 | -3.32544600 | 2.93155300  |
| C | -5.84804400 | -2.26182700 | 2.52557300  |
| H | -6.52055900 | -1.05647300 | 0.84539200  |
| H | -4.84339100 | -3.40605700 | 4.03529800  |
| H | -2.33738100 | -3.74208100 | 4.03229500  |
| H | -6.84418900 | -2.39069700 | 2.93281600  |
| N | -4.49117200 | -1.29735400 | 0.78951400  |
| C | -0.50181100 | 1.01430500  | -3.03147600 |
| H | 0.50900900  | 0.64334800  | -2.89400200 |
| H | -0.70615000 | 1.69215000  | -3.85183800 |
| O | 6.02017600  | -0.41661100 | -1.59854500 |
| N | -0.11689000 | -4.28978700 | -0.92795500 |
| O | 5.04990800  | -3.55293700 | -2.07288900 |
| N | 2.78336000  | 0.42150400  | -1.30907200 |
| H | 1.83079300  | 0.22382000  | -1.00576800 |
| N | -1.37397500 | 3.32813300  | -0.34856800 |
| H | -1.84112600 | 3.88324500  | -1.04614700 |
| C | -3.73238300 | 1.72960700  | 2.01209300  |
| H | -4.78211900 | 1.63562400  | 2.27463900  |
| C | -3.36657400 | 2.52630100  | 0.94138800  |
| H | -4.10514500 | 3.06733500  | 0.35718400  |
| C | -2.00546100 | 2.60585000  | 0.63641900  |
| C | -1.01068500 | 1.89704500  | 1.35439500  |
| C | 0.25698500  | 2.19712500  | 0.71713600  |
| C | 1.58948900  | 1.62677800  | 0.93670200  |
| C | 2.71353200  | 2.29224800  | 0.20793700  |
| C | 3.53206700  | -0.68410500 | -1.56943100 |
| C | 1.89908600  | -4.07271300 | -2.03062900 |
| H | 2.57749700  | -4.38934500 | -2.82453600 |
| C | 0.44465200  | -4.46603900 | -2.26187000 |
| H | -0.06240300 | -3.82658300 | -2.99127800 |
| H | 0.38456500  | -5.51569900 | -2.60698400 |
| C | -1.47934200 | -4.75622500 | -0.78773300 |
| H | -1.81403200 | -4.60959600 | 0.24368800  |
| H | -1.58292200 | -5.82799300 | -1.03867100 |

|   |             |             |             |
|---|-------------|-------------|-------------|
| H | -2.13909300 | -4.17921200 | -1.44287400 |
| N | 1.95613000  | -2.61871000 | -1.92265500 |
| H | 1.12707000  | -2.16345300 | -1.54708800 |
| C | 0.82807800  | -4.95771500 | -0.02806500 |
| H | 0.58810500  | -6.03195300 | 0.06441500  |
| H | 0.76041000  | -4.51991100 | 0.97462500  |
| C | 2.21157300  | -4.77417700 | -0.69180400 |
| H | 2.69219000  | -5.73815100 | -0.87372500 |
| H | 2.90167700  | -4.16638900 | -0.10459600 |
| C | 4.53309600  | -2.47142000 | -1.91410600 |
| C | 4.97490400  | -1.01767400 | -1.67425500 |
| C | 4.44703600  | 2.19758200  | -1.50705100 |
| H | 4.91822900  | 1.64161100  | -2.30897900 |
| C | 4.94733000  | 3.39993200  | -1.09384700 |
| H | 5.82081100  | 3.82155700  | -1.58280400 |
| C | 4.84174000  | 5.38141200  | 0.39224000  |
| H | 5.70295200  | 5.79714400  | -0.12386200 |
| C | 4.26000200  | 6.05357600  | 1.43595300  |
| H | 4.65241000  | 7.01330400  | 1.75585200  |
| C | 3.14898100  | 5.48903700  | 2.10589100  |
| H | 2.69958500  | 6.01985100  | 2.93914000  |
| C | 2.63753300  | 4.27770600  | 1.71513900  |
| H | 1.78782800  | 3.84820200  | 2.23558600  |
| C | 3.20952300  | 3.56481500  | 0.62514200  |
| C | 1.76384100  | 0.46689000  | 1.60750900  |
| H | 0.86941400  | -0.03071800 | 1.97295300  |
| C | 2.99404900  | -0.33056100 | 1.73342900  |
| C | 4.29369100  | 0.20217200  | 1.71690500  |
| H | 4.43797000  | 1.27637800  | 1.71016200  |
| C | 5.40297600  | -0.63503900 | 1.69897500  |
| H | 6.39590300  | -0.20200200 | 1.64421100  |
| C | 5.24790100  | -2.01955300 | 1.73352000  |
| H | 6.11654800  | -2.66847200 | 1.70410500  |
| C | 3.96824600  | -2.56112600 | 1.81763900  |
| H | 3.83632600  | -3.63698400 | 1.88312100  |
| C | 2.85656400  | -1.72500200 | 1.81656200  |
| H | 1.85861000  | -2.15531500 | 1.86493000  |
| C | -2.76315900 | 1.05295900  | 2.77651200  |
| H | -3.07972500 | 0.45032700  | 3.62235000  |
| C | -1.41689800 | 1.13150300  | 2.46312500  |
| H | -0.69232500 | 0.61287800  | 3.08035800  |
| C | -0.02838700 | 3.07985300  | -0.29962700 |
| H | 0.65095100  | 3.53422800  | -1.00681800 |
| C | 3.13547300  | -1.99357600 | -1.81272400 |

|   |            |            |             |
|---|------------|------------|-------------|
| C | 3.31269800 | 1.64360800 | -0.85909500 |
| C | 4.33989500 | 4.12516200 | -0.03412700 |

## B

|                                              |                             |
|----------------------------------------------|-----------------------------|
| Zero-point correction=                       | 1.067842 (Hartree/Particle) |
| Thermal correction to Energy=                | 1.126312                    |
| Thermal correction to Enthalpy=              | 1.127177                    |
| Thermal correction to Gibbs Free Energy=     | 0.974619                    |
| Sum of electronic and zero-point Energies=   | -3582.959994                |
| Sum of electronic and thermal Energies=      | -3582.901524                |
| Sum of electronic and thermal Enthalpies=    | -3582.900659                |
| Sum of electronic and thermal Free Energies= | -3583.053217                |
| SCF Done: E(RM062X) =                        | -3585.00398603              |

|   |             |             |             |
|---|-------------|-------------|-------------|
| C | -3.26180258 | -0.24678111 | 0.00000000  |
| C | -1.87324658 | -0.52118911 | -0.19993700 |
| C | -0.68083258 | -0.74057611 | -0.22830000 |
| C | 0.72219042  | -1.01922111 | -0.20078700 |
| C | 1.53972542  | -0.74410811 | -1.30544800 |
| C | 1.28087742  | -1.56959411 | 0.96344000  |
| C | 2.90106442  | -1.01661511 | -1.24118400 |
| H | 1.09616042  | -0.31298711 | -2.19683500 |
| C | 2.64310842  | -1.83968311 | 1.01444000  |
| H | 0.62567442  | -1.77594711 | 1.80607500  |
| C | 3.45478942  | -1.56316311 | -0.08463200 |
| H | 3.53315142  | -0.80432711 | -2.09722600 |
| H | 3.07443742  | -2.27197211 | 1.91207400  |
| H | 4.51786942  | -1.77577411 | -0.04115800 |
| C | -3.75203258 | -0.08688511 | 1.41956300  |
| O | -4.91497758 | 0.22108489  | 1.66027700  |
| N | -2.79965158 | -0.24134611 | 2.36775300  |
| H | -1.88547358 | -0.58540711 | 2.08172400  |
| C | -2.94316258 | -0.08055411 | 3.74313800  |
| C | -1.74965058 | -0.31098011 | 4.50546000  |
| C | -4.10690558 | 0.28067689  | 4.39027800  |
| C | -1.79315158 | -0.20144311 | 5.91820300  |
| C | -4.12190858 | 0.40085589  | 5.80072100  |
| H | -5.00652658 | 0.46932789  | 3.82028900  |
| C | 0.47962942  | -0.85602011 | 4.51798800  |
| C | -0.59115158 | -0.46161011 | 6.62216500  |
| C | -3.00610658 | 0.16007189  | 6.55813800  |
| H | -5.05221258 | 0.68963289  | 6.28052500  |
| C | 0.54419542  | -0.79071511 | 5.92974800  |

|   |              |             |             |
|---|--------------|-------------|-------------|
| H | 1.37314542   | -1.09877411 | 3.94407500  |
| H | -0.58827458  | -0.39354311 | 7.70651500  |
| H | -3.02955658  | 0.24673989  | 7.63984200  |
| H | 1.48006042   | -0.99385911 | 6.43726300  |
| N | -0.61429658  | -0.63128411 | 3.82776300  |
| C | -4.13913158  | -0.08436511 | -0.99949400 |
| H | -5.18404358  | 0.11827489  | -0.78109100 |
| H | -3.82488358  | -0.14683411 | -2.03513900 |
| C | -2.09177958  | 2.93723189  | -1.37239100 |
| C | -1.08313358  | 2.65763189  | -0.44160300 |
| C | 0.23415242   | 2.47506589  | -0.82672800 |
| C | 0.51863442   | 2.58421089  | -2.19201800 |
| C | -0.47686058  | 2.85857589  | -3.12995900 |
| C | -1.80113458  | 3.03659189  | -2.72193900 |
| C | -3.35625758  | 3.04159089  | -0.63011700 |
| C | -2.97984358  | 2.81349089  | 0.84020300  |
| H | 1.01183442   | 2.24015389  | -0.10757800 |
| H | 1.54332042   | 2.44795389  | -2.52469000 |
| H | -0.21911358  | 2.93701489  | -4.18029600 |
| H | -2.59540258  | 3.25020989  | -3.42991000 |
| N | -1.62518458  | 2.58637889  | 0.85128800  |
| O | -3.70912258  | 2.81628889  | 1.81528900  |
| N | -4.49889958  | 3.23574389  | -1.13902400 |
| C | -5.67161958  | 3.23586089  | -0.28803700 |
| H | -5.91032458  | 2.20843189  | 0.02293600  |
| H | -5.56321158  | 3.84752289  | 0.62099200  |
| C | -6.83873958  | 3.75608389  | -1.08820200 |
| F | -7.95796858  | 3.75797689  | -0.34210400 |
| F | -7.08231658  | 3.01885189  | -2.17692700 |
| F | -6.62925358  | 5.01827789  | -1.49417000 |
| C | -0.86015458  | 2.29794089  | 2.04249700  |
| H | -0.38418458  | 1.31396989  | 1.96353600  |
| H | -0.09361058  | 3.06345389  | 2.19736400  |
| H | -1.55239858  | 2.29491489  | 2.88626400  |
| O | -10.71902858 | 0.98351489  | 0.65156800  |
| N | -5.80532658  | 5.22252689  | 2.29393400  |
| O | -9.88517158  | 3.25104289  | 2.90833900  |
| N | -7.53750258  | -0.01124911 | 0.58530100  |
| H | -6.63533558  | -0.17065511 | 1.02947500  |
| N | -3.65088258  | -3.43766411 | -0.36592200 |
| H | -3.14560858  | -3.53769211 | -1.23050500 |
| C | -1.45232458  | -3.65769211 | 2.60169000  |
| H | -0.42584158  | -3.80327011 | 2.92481800  |
| C | -1.75171158  | -3.66669711 | 1.25148400  |

|   |              |             |             |
|---|--------------|-------------|-------------|
| H | -0.98105158  | -3.81153211 | 0.49992900  |
| C | -3.08706458  | -3.46665411 | 0.88717700  |
| C | -4.11981058  | -3.22918011 | 1.82909600  |
| C | -5.33328558  | -2.99256411 | 1.06774600  |
| C | -6.66072258  | -2.54445111 | 1.50685200  |
| C | -7.69800958  | -2.42283011 | 0.43307800  |
| C | -8.27741658  | 0.96163889  | 1.19360200  |
| C | -6.85892558  | 3.56540789  | 3.55443500  |
| H | -7.64514458  | 3.40214189  | 4.29479000  |
| C | -7.13378858  | 4.84200289  | 2.75152500  |
| H | -7.81674658  | 4.68145289  | 1.91368300  |
| H | -7.57612358  | 5.60804789  | 3.41733600  |
| C | -5.74840858  | 6.51423389  | 1.64453600  |
| H | -4.71923458  | 6.72887589  | 1.34134600  |
| H | -6.09423458  | 7.33217389  | 2.30229300  |
| H | -6.37156858  | 6.50041389  | 0.74588800  |
| N | -6.79884458  | 2.37233289  | 2.70581800  |
| H | -5.89099058  | 2.08366489  | 2.34853900  |
| C | -4.96013258  | 5.10684489  | 3.47594900  |
| H | -5.08173758  | 5.99068189  | 4.13042300  |
| H | -3.90757958  | 5.03171189  | 3.18811100  |
| C | -5.47504358  | 3.84010589  | 4.18664900  |
| H | -5.55881358  | 3.99518689  | 5.26422500  |
| H | -4.80245758  | 2.99556589  | 4.01983900  |
| C | -9.32527358  | 2.41930189  | 2.23204700  |
| C | -9.70829458  | 1.35034089  | 1.20180300  |
| C | -9.14368158  | -1.02109311 | -0.94845300 |
| H | -9.46801258  | -0.02252211 | -1.21646300 |
| C | -9.71315858  | -2.12679211 | -1.51309000 |
| H | -10.49739658 | -2.01573411 | -2.25622000 |
| C | -9.87504758  | -4.58969311 | -1.73238200 |
| H | -10.64737758 | -4.45675311 | -2.48513700 |
| C | -9.48033958  | -5.84540711 | -1.34937200 |
| H | -9.93363158  | -6.72285011 | -1.79891000 |
| C | -8.48569058  | -5.99835011 | -0.35492600 |
| H | -8.18698058  | -6.99449311 | -0.04426200 |
| C | -7.89963958  | -4.90072911 | 0.22278600  |
| H | -7.14179058  | -5.02475911 | 0.98934000  |
| C | -8.27634158  | -3.58496311 | -0.16584600 |
| C | -6.87881458  | -2.10413111 | 2.76531500  |
| H | -6.02257958  | -2.06708011 | 3.43178700  |
| C | -8.08771058  | -1.47647011 | 3.31791300  |
| C | -9.39361858  | -1.72796311 | 2.86735500  |
| H | -9.57147158  | -2.49806411 | 2.12520800  |



|   |              |             |             |
|---|--------------|-------------|-------------|
| C | -10.46352958 | -0.98732411 | 3.35667700  |
| H | -11.45999358 | -1.17010411 | 2.96909600  |
| C | -10.25982358 | 0.00644489  | 4.31288200  |
| H | -11.09213058 | 0.60769089  | 4.66276700  |
| C | -8.97797258  | 0.22600689  | 4.81159700  |
| H | -8.81125758  | 0.98833489  | 5.56663700  |
| C | -7.90875958  | -0.51836811 | 4.32755200  |
| H | -6.90664658  | -0.34010811 | 4.70958100  |
| C | -2.46436958  | -3.48312711 | 3.56498000  |
| H | -2.20267958  | -3.50328111 | 4.61854500  |
| C | -3.78191058  | -3.27792411 | 3.19614400  |
| H | -4.53464858  | -3.16982111 | 3.96719300  |
| C | -4.98429458  | -3.14822611 | -0.25532900 |
| H | -5.60993958  | -3.05472411 | -1.13160300 |
| C | -7.92081458  | 1.96155289  | 2.09089600  |
| C | -8.12542958  | -1.16786311 | 0.02805400  |
| C | -9.29382458  | -3.43418711 | -1.14997400 |

## TS1

|                                              |                             |
|----------------------------------------------|-----------------------------|
| Zero-point correction=                       | 1.063516 (Hartree/Particle) |
| Thermal correction to Energy=                | 1.121311                    |
| Thermal correction to Enthalpy=              | 1.122176                    |
| Thermal correction to Gibbs Free Energy=     | 0.972103                    |
| Sum of electronic and zero-point Energies=   | -3582.946537                |
| Sum of electronic and thermal Energies=      | -3582.888742                |
| Sum of electronic and thermal Enthalpies=    | -3582.887877                |
| Sum of electronic and thermal Free Energies= | -3583.037950                |
| SCF Done: E(RM062X) =                        | -3584.98694055              |

|   |             |             |             |
|---|-------------|-------------|-------------|
| C | -1.80257511 | -0.61158797 | 0.00000000  |
| C | -0.43403911 | -0.95520497 | -0.23531900 |
| C | 0.73823989  | -1.26157197 | -0.29087700 |
| C | 2.11313289  | -1.65862197 | -0.29599500 |
| C | 2.96980389  | -1.30340397 | -1.34648000 |
| C | 2.60464389  | -2.40650197 | 0.78534400  |
| C | 4.30344189  | -1.69187597 | -1.31010000 |
| H | 2.58244089  | -0.71094697 | -2.16866700 |
| C | 3.94011789  | -2.79101497 | 0.80914900  |
| H | 1.91926689  | -2.67060997 | 1.58709600  |
| C | 4.79097489  | -2.43445497 | -0.23555500 |
| H | 4.96620889  | -1.41471697 | -2.12340100 |
| H | 4.31968889  | -3.37436597 | 1.64244500  |
| H | 5.83300989  | -2.73617097 | -0.21378500 |

|   |             |             |             |
|---|-------------|-------------|-------------|
| C | -2.27705711 | -0.57565997 | 1.43234500  |
| O | -3.40875611 | -0.19241397 | 1.71814500  |
| N | -1.34860411 | -0.93393597 | 2.35005800  |
| H | -0.47996311 | -1.34923897 | 2.01961100  |
| C | -1.48434611 | -0.91436397 | 3.73552700  |
| C | -0.36112111 | -1.42796997 | 4.46670700  |
| C | -2.57868111 | -0.43064097 | 4.42351500  |
| C | -0.41819811 | -1.48603997 | 5.88249500  |
| C | -2.60516911 | -0.48140597 | 5.83753500  |
| H | -3.41902011 | -0.02099197 | 3.88084100  |
| C | 1.74922989  | -2.32883897 | 4.41949300  |
| C | 0.70574889  | -2.03083597 | 6.55208300  |
| C | -1.56607511 | -1.00414397 | 6.56102600  |
| H | -3.48331511 | -0.09778497 | 6.34798400  |
| C | 1.78765089  | -2.45673897 | 5.82797900  |
| H | 2.60650989  | -2.63992897 | 3.82347000  |
| H | 0.69254389  | -2.09973697 | 7.63631300  |
| H | -1.60006511 | -1.05024597 | 7.64493800  |
| H | 2.66371289  | -2.87646597 | 6.30868100  |
| N | 0.72468689  | -1.84172697 | 3.75957800  |
| C | -2.66595911 | -0.28911997 | -0.97329800 |
| H | -3.69692111 | -0.04210997 | -0.73949100 |
| H | -2.35153911 | -0.25833097 | -2.01031400 |
| C | 0.30663489  | 2.63849103  | -0.80483400 |
| C | 1.18307689  | 2.08472303  | 0.14014000  |
| C | 2.51358289  | 1.83965903  | -0.15226100 |
| C | 2.95735289  | 2.17800803  | -1.43570600 |
| C | 2.09740889  | 2.72941903  | -2.38470500 |
| C | 0.75363289  | 2.95879103  | -2.07457300 |
| C | -1.02144711 | 2.69018203  | -0.18229200 |
| C | -0.82608011 | 2.17974503  | 1.23623200  |
| H | 3.18308189  | 1.38757803  | 0.57218300  |
| H | 3.99572589  | 1.99573003  | -1.69535200 |
| H | 2.47449189  | 2.98001403  | -3.37021800 |
| H | 0.06295789  | 3.37628303  | -2.79999100 |
| N | 0.49853689  | 1.83478703  | 1.33947400  |
| O | -1.65480411 | 2.11001203  | 2.13251900  |
| N | -2.10327911 | 3.05206403  | -0.74291800 |
| C | -3.34838411 | 2.92237703  | -0.06372400 |
| H | -3.49404111 | 1.93654903  | 0.39380000  |
| H | -3.46798311 | 3.76283003  | 0.96763300  |
| C | -4.46632211 | 3.19058303  | -1.02504400 |
| F | -5.65651911 | 3.15006703  | -0.39310200 |
| F | -4.52711811 | 2.28982503  | -2.02477400 |

|   |             |             |             |
|---|-------------|-------------|-------------|
| F | -4.36390711 | 4.40136103  | -1.59592700 |
| C | 1.09703089  | 1.24532703  | 2.51304400  |
| H | 1.44655189  | 0.22925003  | 2.29632000  |
| H | 1.93775989  | 1.85440903  | 2.85911300  |
| H | 0.33050789  | 1.20377403  | 3.28894100  |
| O | -9.11979611 | 1.11508703  | 0.82372200  |
| N | -3.72920211 | 4.83225503  | 2.15347900  |
| O | -7.99394211 | 3.30454103  | 3.03222700  |
| N | -6.03925411 | -0.13622897 | 0.60799700  |
| H | -5.13415511 | -0.38965797 | 1.00033500  |
| N | -2.46252111 | -3.70916197 | -0.74002700 |
| H | -1.97506511 | -3.74205697 | -1.61988600 |
| C | -0.27644611 | -4.50293297 | 2.13746500  |
| H | 0.73419989  | -4.78024097 | 2.42236000  |
| C | -0.57937011 | -4.30627497 | 0.80266500  |
| H | 0.17229189  | -4.42035297 | 0.02700800  |
| C | -1.89301311 | -3.94221097 | 0.48891900  |
| C | -2.89322211 | -3.73627497 | 1.47172700  |
| C | -4.08674211 | -3.30452497 | 0.76959200  |
| C | -5.36222411 | -2.79592697 | 1.28820400  |
| C | -6.40873111 | -2.50108397 | 0.25950400  |
| C | -6.66959511 | 0.86713403  | 1.27254900  |
| C | -4.95206111 | 3.37089103  | 3.52267800  |
| H | -5.75046811 | 3.35621703  | 4.26685800  |
| C | -5.09695811 | 4.60530503  | 2.62329800  |
| H | -5.77670811 | 4.44441103  | 1.78234100  |
| H | -5.46132911 | 5.46346203  | 3.21269700  |
| C | -3.53457111 | 6.07894903  | 1.43174700  |
| H | -2.48601811 | 6.16328803  | 1.13287500  |
| H | -3.80401211 | 6.95289903  | 2.04378600  |
| H | -4.14660311 | 6.06952003  | 0.52582800  |
| N | -5.02965511 | 2.12083503  | 2.76562000  |
| H | -4.16624511 | 1.71146303  | 2.41751700  |
| C | -2.88109711 | 4.67182703  | 3.33838500  |
| H | -2.86765011 | 5.61016703  | 3.91707300  |
| H | -1.85875811 | 4.42941003  | 3.03782800  |
| C | -3.54747911 | 3.54020203  | 4.14308100  |
| H | -3.61803011 | 3.80169903  | 5.20034100  |
| H | -2.97612511 | 2.61298903  | 4.06087900  |
| C | -7.54432111 | 2.40557103  | 2.35615300  |
| C | -8.06145311 | 1.38282203  | 1.33976900  |
| C | -7.74988711 | -0.87193897 | -0.96816200 |
| H | -7.98824111 | 0.16908803  | -1.15039500 |
| C | -8.42095811 | -1.87482097 | -1.60821600 |

|   |             |             |             |
|---|-------------|-------------|-------------|
| H | -9.20338311 | -1.63626997 | -2.32269100 |
| C | -8.79484411 | -4.28866397 | -2.02705700 |
| H | -9.56634111 | -4.02910397 | -2.74694100 |
| C | -8.49920611 | -5.60058897 | -1.76094600 |
| H | -9.03181911 | -6.39628597 | -2.27149600 |
| C | -7.50251211 | -5.91915397 | -0.80863000 |
| H | -7.28138811 | -6.95937997 | -0.59162800 |
| C | -6.81700411 | -4.92667197 | -0.15518800 |
| H | -6.05744911 | -5.17723897 | 0.57810300  |
| C | -7.09095511 | -3.55636497 | -0.42136900 |
| C | -5.50992711 | -2.44117297 | 2.58338200  |
| H | -4.63538611 | -2.52312297 | 3.22265300  |
| C | -6.64703011 | -1.75096197 | 3.20994000  |
| C | -7.98011811 | -1.86343197 | 2.78334700  |
| H | -8.24161011 | -2.57333197 | 2.00660500  |
| C | -8.96858211 | -1.05983497 | 3.33955700  |
| H | -9.98584411 | -1.13325997 | 2.97030900  |
| C | -8.65605911 | -0.14050097 | 4.34024400  |
| H | -9.42516311 | 0.50876803  | 4.74500300  |
| C | -7.34891111 | -0.06051997 | 4.81361600  |
| H | -7.09668411 | 0.64351603  | 5.60092000  |
| C | -6.36099311 | -0.86792397 | 4.26194500  |
| H | -5.33879111 | -0.79985797 | 4.62410100  |
| C | -1.26310111 | -4.36329597 | 3.13276500  |
| H | -0.99796211 | -4.54333197 | 4.17034100  |
| C | -2.55666511 | -3.98968097 | 2.81599800  |
| H | -3.29590811 | -3.91054997 | 3.60401400  |
| C | -3.76516511 | -3.32439897 | -0.56937200 |
| H | -4.38767111 | -3.06905997 | -1.41516700 |
| C | -6.20159211 | 1.81160403  | 2.17797200  |
| C | -6.73350411 | -1.18550597 | -0.02964300 |
| C | -8.10896311 | -3.23873297 | -1.36422800 |

## C

|                                              |                             |
|----------------------------------------------|-----------------------------|
| Zero-point correction=                       | 1.067276 (Hartree/Particle) |
| Thermal correction to Energy=                | 1.125326                    |
| Thermal correction to Enthalpy=              | 1.126191                    |
| Thermal correction to Gibbs Free Energy=     | 0.974638                    |
| Sum of electronic and zero-point Energies=   | -3582.954388                |
| Sum of electronic and thermal Energies=      | -3582.896339                |
| Sum of electronic and thermal Enthalpies=    | -3582.895474                |
| Sum of electronic and thermal Free Energies= | -3583.047027                |
| SCF Done: E(RM062X) =                        | -3584.99706436              |

|   |             |             |             |
|---|-------------|-------------|-------------|
| C | -1.60944206 | -0.38626609 | 0.00000000  |
| C | -0.28758806 | -0.73584109 | -0.41773500 |
| C | 0.85861394  | -1.07567609 | -0.62310400 |
| C | 2.20441594  | -1.51682209 | -0.82624000 |
| C | 2.96961594  | -1.03099409 | -1.89429800 |
| C | 2.76216494  | -2.44045309 | 0.07227900  |
| C | 4.27884294  | -1.46777009 | -2.05792900 |
| H | 2.53667294  | -0.29699809 | -2.56595200 |
| C | 4.07214694  | -2.87051309 | -0.10295300 |
| H | 2.14866994  | -2.80240209 | 0.89399200  |
| C | 4.83192594  | -2.38559209 | -1.16674800 |
| H | 4.87168294  | -1.08571209 | -2.88267400 |
| H | 4.50141194  | -3.59033809 | 0.58738500  |
| H | 5.85434294  | -2.72344009 | -1.30120100 |
| C | -1.92311706 | -0.49936309 | 1.46806400  |
| O | -3.01015806 | -0.13853909 | 1.92266300  |
| N | -0.91817006 | -0.99167009 | 2.22858300  |
| H | -0.07815206 | -1.31910209 | 1.75568600  |
| C | -0.90278906 | -1.16881109 | 3.60756100  |
| C | 0.32040694  | -1.70159109 | 4.13947200  |
| C | -1.94835306 | -0.89249609 | 4.46489900  |
| C | 0.43047894  | -1.94450509 | 5.53170500  |
| C | -1.81461206 | -1.13632009 | 5.85248900  |
| H | -2.87507906 | -0.50697609 | 4.06622100  |
| C | 2.44959994  | -2.46087909 | 3.73921500  |
| C | 1.65533094  | -2.48471509 | 5.99715400  |
| C | -0.66276006 | -1.65058509 | 6.38622200  |
| H | -2.65919606 | -0.91332809 | 6.49670900  |
| C | 2.66520894  | -2.74402709 | 5.10870600  |
| H | 3.23892194  | -2.64843009 | 3.01212300  |
| H | 1.77450094  | -2.68652209 | 7.05807900  |
| H | -0.57024906 | -1.84048609 | 7.45089200  |
| H | 3.61416094  | -3.15587009 | 5.43219000  |
| N | 1.32907694  | -1.96591609 | 3.26731300  |
| C | -2.57035006 | 0.03284091  | -0.83571800 |
| H | -3.56408006 | 0.26449591  | -0.46782100 |
| H | -2.37138006 | 0.15457391  | -1.89484200 |
| C | 0.85779294  | 2.70988691  | -0.97332600 |
| C | 1.80862094  | 2.12174391  | -0.11217900 |
| C | 3.13375294  | 1.91711391  | -0.48500800 |
| C | 3.50422094  | 2.32358691  | -1.76166700 |
| C | 2.57123994  | 2.90305891  | -2.63728500 |
| C | 1.24877794  | 3.09614391  | -2.25773900 |

|   |             |             |             |
|---|-------------|-------------|-------------|
| C | -0.39434406 | 2.73949791  | -0.25998700 |
| C | -0.13544006 | 2.19565591  | 1.00288500  |
| H | 3.84481494  | 1.44435891  | 0.18566500  |
| H | 4.52927194  | 2.18023791  | -2.08842400 |
| H | 2.89270794  | 3.20730291  | -3.62827600 |
| H | 0.52485694  | 3.54107091  | -2.93245100 |
| N | 1.17923194  | 1.83305791  | 1.09058400  |
| O | -0.93416806 | 2.04602591  | 2.05102700  |
| N | -1.57798506 | 3.15861391  | -0.81892900 |
| C | -2.72059306 | 2.96111991  | -0.28575900 |
| H | -2.92009706 | 2.45154091  | 0.66302000  |
| H | -1.44204006 | 2.95560791  | 2.23125200  |
| C | -3.94958506 | 3.39348391  | -1.03493900 |
| F | -4.69494506 | 4.24295491  | -0.29403200 |
| F | -4.74400206 | 2.33298091  | -1.29610600 |
| F | -3.67853306 | 3.99289791  | -2.18708300 |
| C | 1.78516694  | 1.13357591  | 2.19995200  |
| H | 2.09664994  | 0.13010791  | 1.89008400  |
| H | 2.65382594  | 1.68698891  | 2.56888300  |
| H | 1.04294194  | 1.04388191  | 2.99452100  |
| O | -7.96763506 | 2.72078891  | 0.26199300  |
| N | -1.88826606 | 4.30077591  | 2.77195100  |
| O | -6.46940706 | 4.51393091  | 2.58012600  |
| N | -5.65557506 | 0.30381591  | 0.81476600  |
| H | -4.87204506 | -0.12709909 | 1.30111300  |
| N | -2.42742806 | -3.35625609 | -1.03573000 |
| H | -1.95818506 | -3.32219209 | -1.92568400 |
| C | -0.20180406 | -4.45959209 | 1.70583400  |
| H | 0.80373294  | -4.79684209 | 1.93871700  |
| C | -0.53269806 | -4.14809709 | 0.39913900  |
| H | 0.19185694  | -4.22956409 | -0.40587900 |
| C | -1.83733606 | -3.70956409 | 0.15445800  |
| C | -2.80274706 | -3.54127209 | 1.17901400  |
| C | -3.99041606 | -2.99867609 | 0.54792400  |
| C | -5.21491006 | -2.44974209 | 1.14248600  |
| C | -6.23365906 | -1.93761209 | 0.17027000  |
| C | -5.98131506 | 1.53870991  | 1.25793500  |
| C | -3.84568006 | 3.41838791  | 3.74385300  |
| H | -4.70563406 | 3.77941291  | 4.31049900  |
| C | -3.33852406 | 4.53478791  | 2.81524200  |
| H | -3.78120906 | 4.50247591  | 1.81771200  |
| H | -3.54765606 | 5.52237991  | 3.25494600  |
| C | -1.13229206 | 5.36088491  | 2.11107300  |
| H | -0.06703306 | 5.11590991  | 2.13041500  |

|   |             |             |             |
|---|-------------|-------------|-------------|
| H | -1.29002006 | 6.32985891  | 2.60579100  |
| H | -1.45348006 | 5.43055891  | 1.06873000  |
| N | -4.26718606 | 2.22622091  | 3.01227900  |
| H | -3.57638606 | 1.50993291  | 2.79683100  |
| C | -1.53896606 | 4.08162391  | 4.18449800  |
| H | -1.59004606 | 5.03218591  | 4.73751500  |
| H | -0.52558606 | 3.67906191  | 4.26393100  |
| C | -2.62552106 | 3.10078891  | 4.64537700  |
| H | -2.85333106 | 3.20372091  | 5.70685800  |
| H | -2.29305006 | 2.07148091  | 4.47210300  |
| C | -6.32562706 | 3.42740591  | 2.06605700  |
| C | -7.02218406 | 2.58166291  | 0.99641400  |
| C | -7.35808706 | -0.05232809 | -0.90565400 |
| H | -7.48684106 | 1.02033191  | -0.99145200 |
| C | -8.09410506 | -0.91006409 | -1.67302800 |
| H | -8.81176906 | -0.51451509 | -2.38614800 |
| C | -8.70593506 | -3.21381409 | -2.35441600 |
| H | -9.41860206 | -2.80039209 | -3.06300800 |
| C | -8.55756706 | -4.57049409 | -2.22198500 |
| H | -9.14984606 | -5.24833009 | -2.82782400 |
| C | -7.63377506 | -5.08883309 | -1.28408300 |
| H | -7.52776706 | -6.16341909 | -1.17398400 |
| C | -6.87392006 | -4.24748909 | -0.51126500 |
| H | -6.16976906 | -4.65189009 | 0.20879800  |
| C | -6.99735706 | -2.83531909 | -0.63503400 |
| C | -5.33651206 | -2.22230909 | 2.46780700  |
| H | -4.48405506 | -2.43313409 | 3.10671900  |
| C | -6.44986106 | -1.50258709 | 3.11095900  |
| C | -7.79234806 | -1.71634509 | 2.77363800  |
| H | -8.04520406 | -2.50353309 | 2.07009300  |
| C | -8.79183806 | -0.92335409 | 3.32639300  |
| H | -9.82694506 | -1.09594209 | 3.05008700  |
| C | -8.47102506 | 0.09457391  | 4.22266000  |
| H | -9.25311106 | 0.72194091  | 4.63737300  |
| C | -7.14204806 | 0.30127891  | 4.58351100  |
| H | -6.88023706 | 1.09443391  | 5.27729100  |
| C | -6.14392006 | -0.50115109 | 4.04190400  |
| H | -5.10438806 | -0.32231509 | 4.30720000  |
| C | -1.15666006 | -4.36334309 | 2.73635900  |
| H | -0.87421206 | -4.63662709 | 3.74857800  |
| C | -2.44226306 | -3.91566909 | 2.48762900  |
| H | -3.15587206 | -3.87231709 | 3.30159900  |
| C | -3.70312706 | -2.92542809 | -0.79746800 |
| H | -4.33052006 | -2.56809409 | -1.60166500 |

|   |             |             |             |
|---|-------------|-------------|-------------|
| C | -5.34735806 | 2.33493891  | 2.20768300  |
| C | -6.42212506 | -0.56803409 | 0.02951000  |
| C | -7.94057606 | -2.31744009 | -1.56615100 |

## D

|                                              |                             |
|----------------------------------------------|-----------------------------|
| Zero-point correction=                       | 1.066860 (Hartree/Particle) |
| Thermal correction to Energy=                | 1.124779                    |
| Thermal correction to Enthalpy=              | 1.125644                    |
| Thermal correction to Gibbs Free Energy=     | 0.976104                    |
| Sum of electronic and zero-point Energies=   | -3582.963983                |
| Sum of electronic and thermal Energies=      | -3582.906064                |
| Sum of electronic and thermal Enthalpies=    | -3582.905199                |
| Sum of electronic and thermal Free Energies= | -3583.054738                |
| SCF Done: E(RM062X) =                        | -3585.00968370              |

|   |             |             |             |
|---|-------------|-------------|-------------|
| H | -1.79184550 | -0.57939913 | 0.00000000  |
| O | -6.09870550 | 5.47717387  | 2.32191700  |
| N | -2.76287450 | -1.15626513 | 0.18010900  |
| O | -6.70758050 | 2.54053287  | 0.94613500  |
| N | -2.82740050 | 4.89961087  | 1.88491800  |
| H | -2.03870450 | 4.51373987  | 1.36732500  |
| N | 2.42669450  | 6.38744287  | 1.89321900  |
| H | 3.06921650  | 6.25864287  | 2.65965500  |
| C | 4.10237150  | 6.83309787  | -1.38051500 |
| H | 5.06841250  | 6.91160787  | -1.86907000 |
| C | 4.04522150  | 6.65171787  | -0.01047700 |
| H | 4.94597550  | 6.58952987  | 0.59404500  |
| C | 2.77935450  | 6.54200287  | 0.57296300  |
| C | 1.58392050  | 6.62431987  | -0.18095200 |
| C | 0.48932350  | 6.52120187  | 0.75773200  |
| C | -0.95675050 | 6.54251287  | 0.49997600  |
| C | -1.81084750 | 7.07210387  | 1.60662500  |
| C | -4.00331350 | 4.25857087  | 1.68244600  |
| C | -4.16098350 | 0.78360987  | 0.18030500  |
| H | -5.23848150 | 0.91799387  | 0.29192200  |
| C | -3.68243150 | -0.39360813 | 1.05768800  |
| H | -3.15237350 | -0.06661613 | 1.94920300  |
| H | -4.51108750 | -1.05465913 | 1.33641500  |
| C | -2.40850850 | -2.49540913 | 0.67014700  |
| H | -1.68473350 | -2.93619313 | -0.01780000 |
| H | -3.30437650 | -3.12108013 | 0.72412600  |
| H | -1.96310650 | -2.38698513 | 1.65854100  |
| N | -3.54457250 | 2.03938287  | 0.55877500  |



|   |             |             |             |
|---|-------------|-------------|-------------|
| H | -2.53069650 | 2.13317487  | 0.51106400  |
| C | -3.40337850 | -1.11020913 | -1.15898800 |
| H | -4.27087850 | -1.78048913 | -1.15878400 |
| H | -2.68014250 | -1.43578313 | -1.90874700 |
| C | -3.79427750 | 0.36168987  | -1.26862900 |
| H | -4.61184350 | 0.53013087  | -1.97030400 |
| H | -2.92408250 | 0.93864287  | -1.59514400 |
| C | -5.73605350 | 3.19581387  | 1.25555500  |
| C | -5.44637950 | 4.55972487  | 1.88624100  |
| C | -3.54989750 | 6.75152487  | 3.29152300  |
| H | -4.26219550 | 6.08484787  | 3.76184100  |
| C | -3.45535950 | 8.05877687  | 3.67176700  |
| H | -4.09080750 | 8.44156687  | 4.46508200  |
| C | -2.43462250 | 10.30103687 | 3.43251000  |
| H | -3.07422350 | 10.65886887 | 4.23485100  |
| C | -1.56322350 | 11.14966887 | 2.80041200  |
| H | -1.49803950 | 12.19096387 | 3.09858400  |
| C | -0.75446850 | 10.66673987 | 1.74566400  |
| H | -0.07666150 | 11.34435987 | 1.23631400  |
| C | -0.81957350 | 9.35253187  | 1.35683900  |
| H | -0.19820250 | 8.99741587  | 0.54157200  |
| C | -1.70027650 | 8.44314687  | 2.00593400  |
| C | -1.45499150 | 6.01871887  | -0.64093800 |
| H | -0.74169050 | 5.54559987  | -1.31335600 |
| C | -2.87059150 | 5.83973487  | -1.00093000 |
| C | -3.88524850 | 6.74406987  | -0.65252400 |
| H | -3.62581150 | 7.68046087  | -0.16956600 |
| C | -5.21787150 | 6.43955587  | -0.90434900 |
| H | -5.99262750 | 7.13475687  | -0.59894600 |
| C | -5.56470450 | 5.23831587  | -1.52340300 |
| H | -6.60800850 | 4.99370087  | -1.69349600 |
| C | -4.56351250 | 4.35340487  | -1.91431400 |
| H | -4.82295750 | 3.41674587  | -2.39929800 |
| C | -3.22965450 | 4.65614387  | -1.66063200 |
| H | -2.44964950 | 3.95120987  | -1.93942800 |
| C | 2.92642250  | 6.92024287  | -2.15263500 |
| H | 3.00646050  | 7.06750887  | -3.22499700 |
| C | 1.67562550  | 6.82206687  | -1.56979700 |
| H | 0.77864550  | 6.90921987  | -2.17409400 |
| C | 1.06093250  | 6.38850587  | 2.00107300  |
| H | 0.57765150  | 6.28793187  | 2.96299300  |
| C | -4.27611350 | 3.01711587  | 1.11830000  |
| C | -2.72358950 | 6.25282887  | 2.25037900  |
| C | -2.53166250 | 8.93941387  | 3.04854700  |

|   |             |            |             |
|---|-------------|------------|-------------|
| C | 0.31532350  | 3.09979887 | 2.67911200  |
| C | 1.57107050  | 3.38480587 | 3.29829700  |
| C | 2.68923650  | 3.63584687 | 3.69387400  |
| C | 4.03047550  | 3.97546987 | 4.05753000  |
| C | 4.45819750  | 3.98027787 | 5.39154900  |
| C | 4.92992150  | 4.32447787 | 3.03526900  |
| C | 5.76787950  | 4.33242487 | 5.69656500  |
| H | 3.75972150  | 3.70851587 | 6.17557600  |
| C | 6.23462550  | 4.68113087 | 3.35422200  |
| H | 4.57847550  | 4.30115587 | 2.00587500  |
| C | 6.65674350  | 4.68507787 | 4.68291700  |
| H | 6.09593650  | 4.33484487 | 6.73072100  |
| H | 6.92655250  | 4.95594487 | 2.56350400  |
| H | 7.67642950  | 4.96265387 | 4.92858800  |
| C | 0.24667650  | 3.15476487 | 1.17446100  |
| O | -0.83729450 | 3.12718287 | 0.58306600  |
| N | 1.44171350  | 3.25567187 | 0.55044900  |
| H | 2.28426050  | 3.25169187 | 1.12259800  |
| C | 1.68637550  | 3.36408187 | -0.81653300 |
| C | 3.06756350  | 3.51311187 | -1.17780500 |
| C | 0.72660750  | 3.31082687 | -1.80599500 |
| C | 3.42253550  | 3.61931987 | -2.54709700 |
| C | 1.09968550  | 3.45834887 | -3.16238900 |
| H | -0.30466750 | 3.14113087 | -1.53357800 |
| C | 5.25701450  | 3.58710287 | -0.50258800 |
| C | 4.80363750  | 3.71163487 | -2.84923300 |
| C | 2.40882050  | 3.61252287 | -3.53856200 |
| H | 0.31880850  | 3.43415387 | -3.91608600 |
| C | 5.72374250  | 3.68498687 | -1.83431600 |
| H | 5.96762450  | 3.56439387 | 0.32362700  |
| H | 5.11314650  | 3.79573387 | -3.88754100 |
| H | 2.68716750  | 3.71438987 | -4.58299800 |
| H | 6.78825750  | 3.74199287 | -2.03153900 |
| N | 3.98818950  | 3.51502787 | -0.18060300 |
| C | -0.79076050 | 2.77241687 | 3.36261000  |
| H | -1.70935650 | 2.53976687 | 2.83654600  |
| H | -0.79472850 | 2.72724287 | 4.44538500  |
| C | 1.94327850  | 0.19845287 | 1.70933400  |
| C | 2.56688250  | 0.27976687 | 0.43686900  |
| C | 3.93235750  | 0.44104787 | 0.27259700  |
| C | 4.71457250  | 0.55654787 | 1.42212200  |
| C | 4.12852550  | 0.50242887 | 2.68690400  |
| C | 2.75391050  | 0.31783887 | 2.84164700  |
| C | 0.52410050  | 0.03848987 | 1.44839100  |

|   |             |             |             |
|---|-------------|-------------|-------------|
| C | 0.35431450  | 0.05721387  | 0.03147900  |
| H | 4.37265450  | 0.50702287  | -0.71857500 |
| H | 5.78649750  | 0.69891587  | 1.32874000  |
| H | 4.75011150  | 0.61210287  | 3.57002200  |
| H | 2.33603150  | 0.30132587  | 3.84116000  |
| N | 1.58921650  | 0.19468387  | -0.54995000 |
| O | -0.70855950 | -0.03562913 | -0.66275900 |
| N | -0.55705550 | -0.17558413 | 2.23341300  |
| C | -0.51139950 | -0.25160513 | 3.51638400  |
| H | 0.37841950  | -0.16855413 | 4.13669200  |
| C | -1.78997950 | -0.49598413 | 4.24728200  |
| F | -1.56590750 | -0.69512413 | 5.55126300  |
| F | -2.46455550 | -1.57400413 | 3.78416200  |
| F | -2.66501850 | 0.53286387  | 4.14967300  |
| C | 1.83542150  | 0.16472487  | -1.97099400 |
| H | 2.43646650  | 1.02682487  | -2.27502500 |
| H | 2.35683950  | -0.75587213 | -2.25421500 |
| H | 0.86933950  | 0.20920487  | -2.47366600 |

## TS2

|                                              |                             |
|----------------------------------------------|-----------------------------|
| Zero-point correction=                       | 1.069621 (Hartree/Particle) |
| Thermal correction to Energy=                | 1.126522                    |
| Thermal correction to Enthalpy=              | 1.127387                    |
| Thermal correction to Gibbs Free Energy=     | 0.979358                    |
| Sum of electronic and zero-point Energies=   | -3582.954283                |
| Sum of electronic and thermal Energies=      | -3582.897382                |
| Sum of electronic and thermal Enthalpies=    | -3582.896517                |
| Sum of electronic and thermal Free Energies= | -3583.044546                |
| SCF Done: E(RM062X) =                        | -3585.00419549              |

|   |             |             |             |
|---|-------------|-------------|-------------|
| H | -0.35407725 | -1.52347457 | -0.01994337 |
| O | -4.51928325 | 4.32701143  | 1.85696763  |
| N | -1.21278025 | -2.13073557 | -0.02930237 |
| O | -5.12167125 | 1.45103943  | 0.35687063  |
| N | -1.25088425 | 3.80583143  | 1.33884163  |
| H | -0.45806725 | 3.42942243  | 0.81536163  |
| N | 3.97793175  | 5.37855443  | 1.36995263  |
| H | 4.62330275  | 5.20921943  | 2.12671463  |
| C | 5.63206775  | 5.87985443  | -1.90706537 |
| H | 6.59522375  | 5.96105143  | -2.40098037 |
| C | 5.58304375  | 5.67912843  | -0.53913237 |
| H | 6.48709875  | 5.60059543  | 0.05846463  |
| C | 4.32132175  | 5.56326643  | 0.05096763  |

|   |             |             |             |
|---|-------------|-------------|-------------|
| C | 3.12049375  | 5.66171443  | -0.69304137 |
| C | 2.03353775  | 5.53502243  | 0.25108163  |
| C | 0.58611575  | 5.53188643  | 0.00520663  |
| C | -0.26746125 | 6.00342943  | 1.13828663  |
| C | -2.41849925 | 3.16081143  | 1.13164663  |
| C | -2.60811325 | -0.25462757 | -0.46588037 |
| H | -3.68093825 | -0.06101957 | -0.52350737 |
| C | -2.34163025 | -1.36719457 | 0.56841763  |
| H | -2.04136725 | -0.97432857 | 1.53664363  |
| H | -3.18605625 | -2.05623657 | 0.67000463  |
| C | -0.87027125 | -3.39096857 | 0.65546363  |
| H | -0.00792925 | -3.83229557 | 0.15390263  |
| H | -1.72501425 | -4.06876557 | 0.60841563  |
| H | -0.61916925 | -3.15576657 | 1.68970263  |
| N | -1.96899425 | 0.99224743  | -0.10274637 |
| H | -0.94842525 | 1.05994643  | -0.07977837 |
| C | -1.57343025 | -2.24045857 | -1.47360437 |
| H | -2.37153625 | -2.98494157 | -1.55584237 |
| H | -0.69239325 | -2.55659757 | -2.03097737 |
| C | -2.04239425 | -0.82204757 | -1.79861737 |
| H | -2.78261625 | -0.81061257 | -2.59898737 |
| H | -1.18388725 | -0.21909957 | -2.10458537 |
| C | -4.14997825 | 2.10058543  | 0.68486363  |
| C | -3.86521425 | 3.43734943  | 1.37114463  |
| C | -1.97196825 | 5.58543443  | 2.83689563  |
| H | -2.66180125 | 4.88681643  | 3.29408463  |
| C | -1.89505625 | 6.87812543  | 3.26779463  |
| H | -2.52234025 | 7.21681243  | 4.08723063  |
| C | -0.92287725 | 9.14792843  | 3.09700963  |
| H | -1.55547825 | 9.46238443  | 3.92275663  |
| C | -0.07901425 | 10.03684843 | 2.48345563  |
| H | -0.02887225 | 11.06728043 | 2.81996763  |
| C | 0.72165575  | 9.61007143  | 1.39857863  |
| H | 1.37821275  | 10.31952743 | 0.90500863  |
| C | 0.67594075  | 8.31035143  | 0.96169863  |
| H | 1.29199775  | 7.99733943  | 0.12555463  |
| C | -0.17668125 | 7.35988143  | 1.58944863  |
| C | 0.08507975  | 5.03775743  | -1.14788237 |
| H | 0.79823675  | 4.60048443  | -1.84410937 |
| C | -1.33190725 | 4.85244243  | -1.49897337 |
| C | -2.35254625 | 5.73501143  | -1.11352337 |
| H | -2.09735325 | 6.65850743  | -0.60407637 |
| C | -3.68458425 | 5.42551043  | -1.36253337 |
| H | -4.46301225 | 6.10363943  | -1.02908737 |

|   |             |            |             |
|---|-------------|------------|-------------|
| C | -4.02589025 | 4.24100643 | -2.01614937 |
| H | -5.06836425 | 3.99155243 | -2.18462837 |
| C | -3.01952025 | 3.37879543 | -2.44266737 |
| H | -3.27425325 | 2.45335743 | -2.95153537 |
| C | -1.68629625 | 3.68650443 | -2.19164937 |
| H | -0.90231025 | 2.99749343 | -2.49703937 |
| C | 4.45135275  | 5.98150443 | -2.66963137 |
| H | 4.52425775  | 6.14276343 | -3.74050937 |
| C | 3.20405075  | 5.87962343 | -2.07922837 |
| H | 2.30372975  | 5.97753843 | -2.67681437 |
| C | 2.61410775  | 5.37437043 | 1.48669563  |
| H | 2.13906375  | 5.23173643 | 2.44702063  |
| C | -2.69451525 | 1.93920443 | 0.52494663  |
| C | -1.15652225 | 5.14393643 | 1.76218663  |
| C | -1.00006925 | 7.79993543 | 2.66314763  |
| C | 1.82966575  | 2.06197843 | 2.14576563  |
| C | 3.05175075  | 2.37102343 | 2.77481563  |
| C | 4.15878575  | 2.63162843 | 3.21368663  |
| C | 5.49103875  | 2.96210443 | 3.59866963  |
| C | 5.89875675  | 2.98709343 | 4.94158063  |
| C | 6.42634475  | 3.27019943 | 2.59141163  |
| C | 7.20958475  | 3.31462743 | 5.26627063  |
| H | 5.17952275  | 2.74963543 | 5.71820163  |
| C | 7.73173575  | 3.60471443 | 2.93111263  |
| H | 6.09904475  | 3.23396843 | 1.55427763  |
| C | 8.12993175  | 3.62686543 | 4.26689963  |
| H | 7.51455675  | 3.33130143 | 6.30772963  |
| H | 8.44448975  | 3.84872243 | 2.14835063  |
| H | 9.15016775  | 3.88716043 | 4.52837163  |
| C | 1.75269275  | 2.13249643 | 0.69149763  |
| O | 0.67777475  | 2.02203643 | 0.06094863  |
| N | 2.94763275  | 2.34045043 | 0.04524163  |
| H | 3.78340275  | 2.39735343 | 0.62164663  |
| C | 3.19418675  | 2.42122943 | -1.31278837 |
| C | 4.58032475  | 2.55763943 | -1.67975237 |
| C | 2.24277275  | 2.34073643 | -2.31351037 |
| C | 4.93985175  | 2.64911443 | -3.04985937 |
| C | 2.62390075  | 2.45610343 | -3.66958737 |
| H | 1.20965875  | 2.18627443 | -2.03938437 |
| C | 6.77256775  | 2.62089943 | -1.00225737 |
| C | 6.32172075  | 2.74254743 | -3.34821437 |
| C | 3.93270975  | 2.61463243 | -4.04704737 |
| H | 1.84605275  | 2.41178743 | -4.42611437 |
| C | 7.24125575  | 2.72166243 | -2.33239637 |

|   |             |             |             |
|---|-------------|-------------|-------------|
| H | 7.48122675  | 2.59407743  | -0.17412837 |
| H | 6.63271375  | 2.82181243  | -4.38658337 |
| H | 4.21461075  | 2.69973643  | -5.09186837 |
| H | 8.30591375  | 2.78120143  | -2.52879437 |
| N | 5.50223275  | 2.55172643  | -0.68335637 |
| C | 0.72157075  | 1.58013843  | 2.88056663  |
| H | -0.23935225 | 1.59807943  | 2.37631863  |
| H | 0.67926175  | 1.81939543  | 3.94066263  |
| C | 3.48041075  | -0.59831257 | 1.43241063  |
| C | 4.16153375  | -0.61109757 | 0.19274463  |
| C | 5.53297775  | -0.49536557 | 0.08270463  |
| C | 6.26724675  | -0.35821257 | 1.26437063  |
| C | 5.62934575  | -0.35942257 | 2.50043863  |
| C | 4.24022175  | -0.47787057 | 2.59503763  |
| C | 2.05373775  | -0.74165657 | 1.11104963  |
| C | 1.98020775  | -0.86597057 | -0.37079937 |
| H | 6.01826575  | -0.48596357 | -0.88829337 |
| H | 7.34524375  | -0.24473557 | 1.21386163  |
| H | 6.21239875  | -0.23708957 | 3.40714063  |
| H | 3.77890975  | -0.44352957 | 3.57377263  |
| N | 3.24226175  | -0.75903157 | -0.85855037 |
| O | 0.96084775  | -1.02070557 | -1.05746337 |
| N | 0.92886275  | -0.80796457 | 1.77099563  |
| C | 0.88868675  | -0.39505657 | 3.06485363  |
| H | 1.77955475  | -0.45868357 | 3.68915963  |
| C | -0.32790925 | -0.79988657 | 3.83971263  |
| F | -0.19149725 | -0.46551057 | 5.12800763  |
| F | -0.56385825 | -2.13299557 | 3.79622263  |
| F | -1.46331125 | -0.21793557 | 3.40072763  |
| C | 3.58208875  | -0.82442057 | -2.26120937 |
| H | 4.16069975  | 0.05579343  | -2.55484337 |
| H | 4.16035575  | -1.72937357 | -2.47341537 |
| H | 2.64836375  | -0.84000857 | -2.82301537 |

## TS2'

|                                              |                             |
|----------------------------------------------|-----------------------------|
| Zero-point correction=                       | 1.069351 (Hartree/Particle) |
| Thermal correction to Energy=                | 1.126006                    |
| Thermal correction to Enthalpy=              | 1.126871                    |
| Thermal correction to Gibbs Free Energy=     | 0.980004                    |
| Sum of electronic and zero-point Energies=   | -3582.948592                |
| Sum of electronic and thermal Energies=      | -3582.891937                |
| Sum of electronic and thermal Enthalpies=    | -3582.891072                |
| Sum of electronic and thermal Free Energies= | -3583.037939                |

SCF Done: E(RM062X) = -3585.00170730

|   |             |             |             |
|---|-------------|-------------|-------------|
| C | -0.42278892 | 0.88880408  | 0.08306188  |
| C | 0.83283408  | 0.49074408  | -0.41967412 |
| C | 1.94374408  | 0.10003708  | -0.74268112 |
| C | 3.28990208  | -0.27992792 | -1.02115812 |
| C | 3.90769108  | 0.03664708  | -2.24038112 |
| C | 4.03306408  | -0.94550192 | -0.03057112 |
| C | 5.23777608  | -0.30106192 | -2.45750112 |
| H | 3.33884208  | 0.56367008  | -2.99907112 |
| C | 5.36211008  | -1.27830892 | -0.25829712 |
| H | 3.54409208  | -1.17299492 | 0.91387888  |
| C | 5.97139208  | -0.95796892 | -1.47084212 |
| H | 5.70667708  | -0.04774592 | -3.40319912 |
| H | 5.92945808  | -1.78921992 | 0.51440788  |
| H | 7.00973108  | -1.21953392 | -1.64637912 |
| C | -0.82152292 | 0.43632208  | 1.40015788  |
| O | -1.92560992 | 0.73750708  | 1.90244888  |
| N | 0.10232208  | -0.29651992 | 2.10324788  |
| H | 0.96410008  | -0.53682192 | 1.62105588  |
| C | -0.04629792 | -0.90132992 | 3.34192388  |
| C | 1.06408808  | -1.70595792 | 3.77677288  |
| C | -1.15035692 | -0.78714492 | 4.16651388  |
| C | 0.97610208  | -2.41976892 | 5.00032188  |
| C | -1.21459592 | -1.50730192 | 5.38055788  |
| H | -1.97747592 | -0.16912692 | 3.85140688  |
| C | 3.18514908  | -2.48704992 | 3.36831188  |
| C | 2.08947408  | -3.21550192 | 5.36490588  |
| C | -0.19137492 | -2.31858392 | 5.79618488  |
| H | -2.11185792 | -1.41358792 | 5.98549988  |
| C | 3.19277608  | -3.25668592 | 4.55397988  |
| H | 4.05477608  | -2.49621692 | 2.71200688  |
| H | 2.05031608  | -3.78433092 | 6.29008888  |
| H | -0.25278092 | -2.87811392 | 6.72431388  |
| H | 4.06123708  | -3.85530892 | 4.80444188  |
| N | 2.17216208  | -1.74335592 | 2.98859888  |
| C | -1.37303092 | 1.65000908  | -0.68157912 |
| H | -2.42154192 | 1.41322008  | -0.50225312 |
| H | -1.12926492 | 1.77854708  | -1.73325712 |
| C | 2.26030708  | 3.33922108  | 0.16052088  |
| C | 2.89381208  | 2.61023708  | 1.17830688  |
| C | 4.22364308  | 2.23202308  | 1.10086488  |
| C | 4.92136508  | 2.59401608  | -0.05388012 |
| C | 4.30157408  | 3.30393108  | -1.08415912 |

|   |             |             |             |
|---|-------------|-------------|-------------|
| C | 2.95888408  | 3.67114208  | -0.99124612 |
| C | 0.84913108  | 3.43717408  | 0.51848888  |
| C | 0.74741508  | 2.85410508  | 1.88935788  |
| H | 4.69751708  | 1.65087108  | 1.88486688  |
| H | 5.95772308  | 2.29028608  | -0.16080312 |
| H | 4.86808908  | 3.55326708  | -1.97505412 |
| H | 2.45524608  | 4.19857108  | -1.79476212 |
| N | 1.96992708  | 2.34427508  | 2.20358788  |
| O | -0.20248892 | 2.93042308  | 2.70284988  |
| N | -0.09568692 | 3.86678608  | -0.26036212 |
| C | -1.38385992 | 3.43489908  | -0.05774212 |
| H | -1.77654892 | 3.23056008  | 0.94314388  |
| C | -2.38622092 | 4.18176208  | -0.88690712 |
| F | -3.61259892 | 3.64993408  | -0.74478512 |
| F | -2.08733792 | 4.19717008  | -2.18366712 |
| F | -2.49480592 | 5.48027908  | -0.49244312 |
| C | 2.28542508  | 1.67707408  | 3.44600788  |
| H | 2.68764008  | 0.68066308  | 3.23980088  |
| H | 3.01469308  | 2.25788408  | 4.02012388  |
| H | 1.35977808  | 1.57574708  | 4.01404588  |
| H | -1.10522092 | 4.24934108  | 2.55147388  |
| O | -7.14262892 | 2.51125508  | 0.03431888  |
| N | -1.53118392 | 5.16471708  | 2.89826988  |
| O | -6.03828992 | 4.64422508  | 2.29869788  |
| N | -4.43833692 | 0.60056608  | 0.70920188  |
| H | -3.58828192 | 0.34089208  | 1.21484888  |
| N | -0.31576492 | -2.57420292 | -0.30306012 |
| H | 0.42869008  | -2.25584792 | -0.90594612 |
| C | 0.81702908  | -4.83340192 | 2.40755588  |
| H | 1.65983208  | -5.41096692 | 2.77405788  |
| C | 0.95312608  | -4.09080292 | 1.24719388  |
| H | 1.88658408  | -4.06723092 | 0.69266388  |
| C | -0.15576392 | -3.35694192 | 0.81867088  |
| C | -1.38384792 | -3.34990892 | 1.52481988  |
| C | -2.29060192 | -2.50832692 | 0.77643288  |
| C | -3.65130692 | -2.07423592 | 1.11204188  |
| C | -4.53164892 | -1.67555892 | -0.03097112 |
| C | -5.00877092 | 1.74064708  | 1.12416188  |
| C | -3.43939692 | 3.99682508  | 3.68911388  |
| H | -4.40715292 | 4.25298608  | 4.12174488  |
| C | -3.01579592 | 5.13538808  | 2.74247688  |
| H | -3.29153392 | 4.97376008  | 1.69980388  |
| H | -3.40199692 | 6.10587808  | 3.06943588  |
| C | -0.84280892 | 6.28746608  | 2.22980688  |



|   |             |             |             |
|---|-------------|-------------|-------------|
| H | 0.23046208  | 6.19187508  | 2.40114888  |
| H | -1.21063792 | 7.22933208  | 2.64209988  |
| H | -1.05218992 | 6.22922508  | 1.16116188  |
| N | -3.57834792 | 2.72607408  | 2.99768688  |
| H | -2.74536492 | 2.15919308  | 2.81878288  |
| C | -1.33374592 | 5.05103608  | 4.37425788  |
| H | -1.59517592 | 6.01596408  | 4.81921688  |
| H | -0.28846592 | 4.81237908  | 4.57239888  |
| C | -2.31102992 | 3.93270208  | 4.75121288  |
| H | -2.69087392 | 4.05671308  | 5.76516888  |
| H | -1.80268692 | 2.96714108  | 4.68631588  |
| C | -5.71441792 | 3.55817108  | 1.85790188  |
| C | -6.21459392 | 2.57246008  | 0.80006088  |
| C | -5.80864092 | 0.02649808  | -1.23701312 |
| H | -6.12131692 | 1.06085108  | -1.31753012 |
| C | -6.26195392 | -0.91378992 | -2.11793712 |
| H | -6.93417792 | -0.62358492 | -2.92035212 |
| C | -6.33497192 | -3.25330192 | -2.92704212 |
| H | -6.99861992 | -2.93921392 | -3.72817312 |
| C | -5.96675092 | -4.56739792 | -2.79750512 |
| H | -6.33158192 | -5.31066092 | -3.49884612 |
| C | -5.11351892 | -4.95732692 | -1.73878612 |
| H | -4.83263092 | -6.00039192 | -1.63338812 |
| C | -4.63868892 | -4.03231992 | -0.84375712 |
| H | -3.98631192 | -4.34271592 | -0.03425812 |
| C | -4.99082592 | -2.65896292 | -0.96167312 |
| C | -4.03154792 | -1.92056792 | 2.39845488  |
| H | -3.28437592 | -2.10994092 | 3.16661788  |
| C | -5.29507892 | -1.31805692 | 2.85799588  |
| C | -6.53767192 | -1.60103092 | 2.27631688  |
| H | -6.60537792 | -2.37026192 | 1.51322388  |
| C | -7.67191592 | -0.89309392 | 2.65799888  |
| H | -8.62487692 | -1.11436792 | 2.18845388  |
| C | -7.58980892 | 0.10252408  | 3.63035288  |
| H | -8.47495192 | 0.66321308  | 3.91219588  |
| C | -6.36615992 | 0.37070308  | 4.23839988  |
| H | -6.29076892 | 1.14398208  | 4.99703988  |
| C | -5.23263892 | -0.34199892 | 3.86184288  |
| H | -4.27247192 | -0.11284192 | 4.31910288  |
| C | -0.39576692 | -4.84900492 | 3.12278588  |
| H | -0.46909592 | -5.44241792 | 4.02886788  |
| C | -1.49197992 | -4.11927492 | 2.69529488  |
| H | -2.42401892 | -4.15086792 | 3.25023388  |
| C | -1.59072392 | -2.07606992 | -0.32518312 |

|   |             |             |             |
|---|-------------|-------------|-------------|
| H | -1.91715592 | -1.41935592 | -1.11935512 |
| C | -4.59953492 | 2.64088608  | 2.10687888  |
| C | -4.93489692 | -0.35741592 | -0.18667812 |
| C | -5.86624692 | -2.27362292 | -2.01525612 |

## E

|                                              |                             |
|----------------------------------------------|-----------------------------|
| Zero-point correction=                       | 1.072997 (Hartree/Particle) |
| Thermal correction to Energy=                | 1.129740                    |
| Thermal correction to Enthalpy=              | 1.130605                    |
| Thermal correction to Gibbs Free Energy=     | 0.983271                    |
| Sum of electronic and zero-point Energies=   | -3582.968460                |
| Sum of electronic and thermal Energies=      | -3582.911717                |
| Sum of electronic and thermal Enthalpies=    | -3582.910852                |
| Sum of electronic and thermal Free Energies= | -3583.058186                |
| SCF Done: E(RM062X) =                        | -3585.02335127              |

|   |             |             |             |
|---|-------------|-------------|-------------|
| H | -0.79399142 | 0.30042918  | 0.00000000  |
| O | -3.85488342 | 6.15059318  | 1.66509400  |
| N | -1.68787642 | -0.20697582 | -0.20357400 |
| O | -4.73610042 | 3.30768418  | 0.24856400  |
| N | -0.67872542 | 5.49576018  | 0.74129300  |
| H | 0.04170858  | 5.04909518  | 0.16932900  |
| N | 4.70957658  | 6.48489718  | 0.93976100  |
| H | 5.31099658  | 6.25094918  | 1.71566200  |
| C | 6.48868958  | 6.71191518  | -2.30206800 |
| H | 7.46587058  | 6.66224318  | -2.77204100 |
| C | 6.38332058  | 6.55586518  | -0.93149700 |
| H | 7.25640058  | 6.38172318  | -0.30878900 |
| C | 5.10361458  | 6.60633018  | -0.37274400 |
| C | 3.94090058  | 6.83160318  | -1.14924800 |
| C | 2.82558558  | 6.84964018  | -0.23035400 |
| C | 1.39316658  | 7.00627318  | -0.50509100 |
| C | 0.57988458  | 7.55207418  | 0.62467400  |
| C | -1.90156842 | 4.94713818  | 0.62809700  |
| C | -2.59980742 | 1.72853718  | -1.19330500 |
| H | -3.55931942 | 2.14170218  | -1.50573600 |
| C | -2.83538742 | 0.74192718  | -0.04102200 |
| H | -2.82098542 | 1.20932018  | 0.93986100  |
| H | -3.75430342 | 0.16163618  | -0.16818900 |
| C | -1.71009042 | -1.39202982 | 0.67858500  |
| H | -0.82860542 | -1.99688582 | 0.46318000  |
| H | -2.62039442 | -1.96112882 | 0.48218800  |
| H | -1.68077142 | -1.05762182 | 1.71408800  |

|   |             |             |             |
|---|-------------|-------------|-------------|
| N | -1.74787542 | 2.82247318  | -0.77099700 |
| H | -0.72529642 | 2.76398818  | -0.80431900 |
| C | -1.73620842 | -0.50955682 | -1.67098400 |
| H | -2.60678942 | -1.15663082 | -1.81647700 |
| H | -0.82312842 | -1.01574382 | -1.97098000 |
| C | -1.92690642 | 0.87407618  | -2.29720600 |
| H | -2.53936742 | 0.81964018  | -3.19758300 |
| H | -0.95498742 | 1.29743218  | -2.55843100 |
| C | -3.71873242 | 3.95832818  | 0.39276500  |
| C | -3.30010842 | 5.26664318  | 1.06116100  |
| C | -1.14790442 | 7.28344618  | 2.33031600  |
| H | -1.91077242 | 6.66009218  | 2.77868900  |
| C | -0.90998942 | 8.54088518  | 2.80447200  |
| H | -1.47973442 | 8.91961918  | 3.64809600  |
| C | 0.31457358  | 10.68840618 | 2.68770800  |
| H | -0.26836242 | 11.04734618 | 3.53168600  |
| C | 1.24915458  | 11.49263518 | 2.08919300  |
| H | 1.42225558  | 12.49928718 | 2.45559500  |
| C | 1.98323358  | 11.00997618 | 0.98079000  |
| H | 2.71215458  | 11.65381918 | 0.49898300  |
| C | 1.78298758  | 9.73832418  | 0.50643100  |
| H | 2.35023958  | 9.38212418  | -0.34667600 |
| C | 0.83175658  | 8.87362718  | 1.11671000  |
| C | 0.85686958  | 6.58522218  | -1.67139200 |
| H | 1.51960358  | 6.06908918  | -2.36326600 |
| C | -0.56923142 | 6.59030118  | -2.03544100 |
| C | -1.45297742 | 7.61995618  | -1.67937900 |
| H | -1.06737842 | 8.50790818  | -1.18877600 |
| C | -2.81372342 | 7.50225018  | -1.93624000 |
| H | -3.48658042 | 8.29862318  | -1.63539000 |
| C | -3.31836242 | 6.36662318  | -2.57052100 |
| H | -4.38341342 | 6.27441718  | -2.75691300 |
| C | -2.44542142 | 5.35695018  | -2.96501400 |
| H | -2.82599742 | 4.46863518  | -3.46163300 |
| C | -1.08374942 | 5.47115918  | -2.70274900 |
| H | -0.40712642 | 4.66475318  | -2.97533300 |
| C | 5.34717658  | 6.93492118  | -3.09751900 |
| H | 5.46345558  | 7.05573118  | -4.16984900 |
| C | 4.08354658  | 7.00247318  | -2.53734700 |
| H | 3.21700158  | 7.19265318  | -3.16189800 |
| C | 3.35341258  | 6.64079518  | 1.02140800  |
| H | 2.84208458  | 6.56058318  | 1.97001300  |
| C | -2.31894842 | 3.78043718  | -0.01217200 |
| C | -0.40819142 | 6.78746418  | 1.22452900  |

|   |             |            |             |
|---|-------------|------------|-------------|
| C | 0.07690158  | 9.37294918 | 2.21420700  |
| C | 1.93713258  | 3.45218818 | 1.59772100  |
| C | 3.11053358  | 3.65522718 | 2.32791300  |
| C | 4.19441158  | 3.81513518 | 2.87473300  |
| C | 5.51591458  | 3.98028818 | 3.37148100  |
| C | 5.80669758  | 4.01782118 | 4.74651800  |
| C | 6.57892158  | 4.09692018 | 2.44978000  |
| C | 7.11698458  | 4.17018218 | 5.18227700  |
| H | 4.99489658  | 3.92893518 | 5.46072400  |
| C | 7.88293758  | 4.26023318 | 2.90111600  |
| H | 6.34711358  | 4.04822218 | 1.38743700  |
| C | 8.16123958  | 4.29563318 | 4.26688700  |
| H | 7.32525258  | 4.19777918 | 6.24733000  |
| H | 8.69075458  | 4.35756718 | 2.18082000  |
| H | 9.18086058  | 4.42144618 | 4.61522700  |
| C | 1.98323858  | 3.50323418 | 0.17071000  |
| O | 0.96175358  | 3.43429218 | -0.56851700 |
| N | 3.24469958  | 3.61653418 | -0.39580100 |
| H | 4.03386958  | 3.62158818 | 0.24455600  |
| C | 3.60179558  | 3.60456918 | -1.72497000 |
| C | 5.02061458  | 3.54357718 | -1.98519300 |
| C | 2.73130458  | 3.61039818 | -2.80408900 |
| C | 5.49393358  | 3.52085418 | -3.32403800 |
| C | 3.22967458  | 3.60824918 | -4.12520100 |
| H | 1.66862858  | 3.61596418 | -2.61269500 |
| C | 7.14671758  | 3.37305618 | -1.13334600 |
| C | 6.89529058  | 3.42399418 | -3.51036500 |
| C | 4.57318958  | 3.56881218 | -4.40057600 |
| H | 2.51414358  | 3.63497418 | -4.94187500 |
| C | 7.72506858  | 3.34399418 | -2.42289100 |
| H | 7.78130258  | 3.30607018 | -0.24906800 |
| H | 7.29204958  | 3.41000218 | -4.52217800 |
| H | 4.94417558  | 3.56538318 | -5.42065100 |
| H | 8.80062858  | 3.26225018 | -2.53374300 |
| N | 5.85697458  | 3.47552218 | -0.91818200 |
| C | 0.70849358  | 2.95802618 | 2.27683100  |
| H | -0.17496242 | 3.11592418 | 1.65517800  |
| H | 0.54835258  | 3.44698318 | 3.24225700  |
| C | 3.37475358  | 0.65957418 | 1.04452900  |
| C | 4.07514158  | 0.49887318 | -0.17176900 |
| C | 5.45211358  | 0.47170718 | -0.24555800 |
| C | 6.16473358  | 0.61205118 | 0.95026000  |
| C | 5.50505158  | 0.75052918 | 2.16536000  |
| C | 4.10879458  | 0.77634118 | 2.22216300  |

|   |             |             |             |
|---|-------------|-------------|-------------|
| C | 1.94278458  | 0.61837618  | 0.69586600  |
| C | 1.89722458  | 0.37753718  | -0.80389100 |
| H | 5.96235058  | 0.37649018  | -1.19870100 |
| H | 7.24975858  | 0.61873618  | 0.92444000  |
| H | 6.07515158  | 0.87481418  | 3.07955600  |
| H | 3.62836658  | 0.90879818  | 3.18248200  |
| N | 3.17821958  | 0.36313518  | -1.24709800 |
| O | 0.88620358  | 0.26453018  | -1.48169800 |
| N | 0.81172658  | 0.74921718  | 1.28605200  |
| C | 0.79150058  | 1.40492918  | 2.55831700  |
| H | 1.66461858  | 1.20916618  | 3.18892200  |
| C | -0.41241042 | 0.94419218  | 3.34353700  |
| F | -0.47495342 | 1.53856118  | 4.53648600  |
| F | -0.39521042 | -0.38631982 | 3.55504200  |
| F | -1.56675642 | 1.20870318  | 2.69794800  |
| C | 3.56089258  | 0.24044118  | -2.63575500 |
| H | 4.20973758  | 1.07273918  | -2.92291800 |
| H | 4.07787458  | -0.70851382 | -2.80938500 |
| H | 2.64780258  | 0.27853518  | -3.22955800 |

### TS3

|                                              |                             |
|----------------------------------------------|-----------------------------|
| Zero-point correction=                       | 1.071420 (Hartree/Particle) |
| Thermal correction to Energy=                | 1.127881                    |
| Thermal correction to Enthalpy=              | 1.128746                    |
| Thermal correction to Gibbs Free Energy=     | 0.981252                    |
| Sum of electronic and zero-point Energies=   | -3582.977380                |
| Sum of electronic and thermal Energies=      | -3582.920919                |
| Sum of electronic and thermal Enthalpies=    | -3582.920054                |
| Sum of electronic and thermal Free Energies= | -3583.067548                |
| SCF Done: E(RM062X) =                        | -3585.02220337              |

|   |             |             |             |
|---|-------------|-------------|-------------|
| C | -3.48489172 | -1.20686437 | -0.17051016 |
| C | -2.33269772 | -1.61610937 | -0.90637016 |
| C | -1.25715272 | -1.89185737 | -1.39828616 |
| C | 0.03146928  | -2.28482037 | -1.87626616 |
| C | 0.47829428  | -1.94141637 | -3.15925016 |
| C | 0.86810628  | -3.02416037 | -1.02241616 |
| C | 1.73945328  | -2.34239237 | -3.58320016 |
| H | -0.16879972 | -1.36143137 | -3.80866016 |
| C | 2.12615328  | -3.42211437 | -1.45926816 |
| H | 0.51293628  | -3.26378337 | -0.02206216 |
| C | 2.56403528  | -3.08397837 | -2.73867816 |
| H | 2.08103328  | -2.07701837 | -4.57823816 |

|   |             |             |             |
|---|-------------|-------------|-------------|
| H | 2.76779828  | -3.99779137 | -0.79875916 |
| H | 3.54608528  | -3.39679637 | -3.07748116 |
| C | -3.64715872 | -1.88283837 | 1.16493684  |
| O | -4.74212272 | -1.97640837 | 1.72042884  |
| N | -2.48026972 | -2.27245937 | 1.73881684  |
| H | -1.63126772 | -2.20838837 | 1.18230284  |
| C | -2.26492372 | -2.72914137 | 3.03542184  |
| C | -0.89680872 | -3.02978337 | 3.34415184  |
| C | -3.22871672 | -2.86837937 | 4.01118284  |
| C | -0.56218372 | -3.51779437 | 4.63199184  |
| C | -2.87454372 | -3.36716437 | 5.28659484  |
| H | -4.25069872 | -2.59897537 | 3.78792384  |
| C | 1.29384128  | -3.03848337 | 2.65960384  |
| C | 0.80548728  | -3.78911437 | 4.88006384  |
| C | -1.58199572 | -3.69928637 | 5.59952684  |
| H | -3.65848172 | -3.48490037 | 6.02788384  |
| C | 1.73525028  | -3.55254337 | 3.90092684  |
| H | 2.01323728  | -2.82745037 | 1.86878084  |
| H | 1.09983928  | -4.17657537 | 5.85170884  |
| H | -1.32124972 | -4.08588437 | 6.57978084  |
| H | 2.79012828  | -3.74327337 | 4.06216984  |
| N | 0.03463428  | -2.78791737 | 2.38352784  |
| C | -4.75429472 | -0.91701037 | -0.92999316 |
| H | -5.61550172 | -1.10372437 | -0.28571216 |
| H | -4.84764572 | -1.53954037 | -1.82304616 |
| C | -1.81791872 | 1.07694863  | -0.19710216 |
| C | -0.90092972 | 0.89493563  | 0.85421484  |
| C | 0.46826028  | 0.94836363  | 0.65808884  |
| C | 0.92315828  | 1.21773863  | -0.63612416 |
| C | 0.03201928  | 1.43842763  | -1.68242016 |
| C | -1.34753972 | 1.35878463  | -1.47000116 |
| C | -3.15605972 | 0.79402563  | 0.35651084  |
| C | -2.94412872 | 0.70044163  | 1.85028784  |
| H | 1.16058428  | 0.79233063  | 1.47835584  |
| H | 1.99090128  | 1.26243763  | -0.82334716 |
| H | 0.41054628  | 1.66040963  | -2.67409216 |
| H | -2.03176972 | 1.51785363  | -2.29688416 |
| N | -1.58718772 | 0.67855163  | 2.05478684  |
| O | -3.80526172 | 0.59000863  | 2.70197684  |
| N | -4.34883972 | 1.31599463  | -0.11492016 |
| C | -4.75387372 | 0.58725463  | -1.29886116 |
| H | -4.04331372 | 0.77185963  | -2.11106116 |
| C | -6.10367572 | 1.04503563  | -1.80155816 |
| F | -6.45297072 | 0.34312363  | -2.88653516 |

|   |              |             |             |
|---|--------------|-------------|-------------|
| F | -6.10091772  | 2.34064663  | -2.13415016 |
| F | -7.05443572  | 0.86502363  | -0.87340216 |
| C | -0.97460472  | 0.47512863  | 3.34703284  |
| H | -0.23635572  | -0.32933237 | 3.28445384  |
| H | -0.48943372  | 1.39126163  | 3.69819784  |
| H | -1.76543072  | 0.18877263  | 4.04207784  |
| H | -5.09123472  | 1.35564163  | 0.60868984  |
| O | -10.26250372 | -2.90067537 | -0.50834016 |
| N | -6.55451472  | 2.37020763  | 1.70407884  |
| O | -10.40329672 | -0.26995037 | 1.47238584  |
| N | -6.97746172  | -3.12634937 | 0.20208784  |
| H | -6.17965272  | -3.00877937 | 0.82306684  |
| N | -1.89810472  | -4.95556437 | -0.36612616 |
| H | -1.26201372  | -4.69830037 | -1.10479416 |
| C | -0.20624972  | -6.33040237 | 2.63010584  |
| H | 0.75884428   | -6.59773337 | 3.04869084  |
| C | -0.27150772  | -5.80090537 | 1.35384884  |
| H | 0.62165728   | -5.65486637 | 0.75256084  |
| C | -1.53594472  | -5.46329037 | 0.85948784  |
| C | -2.72275072  | -5.65693937 | 1.60771484  |
| C | -3.82282772  | -5.24529637 | 0.76473884  |
| C | -5.26279872  | -5.22271637 | 1.05849284  |
| C | -6.17816172  | -5.37414937 | -0.11451416 |
| C | -8.03545772  | -2.32369037 | 0.48966484  |
| C | -7.73689972  | 0.68223163  | 2.78741784  |
| H | -8.67947772  | 0.43232763  | 3.27837984  |
| C | -7.91780172  | 1.85700463  | 1.82432284  |
| H | -8.33755972  | 1.56217463  | 0.86193684  |
| H | -8.58640672  | 2.61049063  | 2.28126284  |
| C | -6.46790172  | 3.62188863  | 0.97400384  |
| H | -5.42436572  | 3.94608763  | 0.92266784  |
| H | -7.06334472  | 4.41982563  | 1.45076084  |
| H | -6.82807472  | 3.47616063  | -0.04700116 |
| N | -7.26132372  | -0.51185637 | 2.08940084  |
| H | -6.26611472  | -0.71613937 | 2.06941184  |
| C | -6.12087672  | 2.48372163  | 3.09949784  |
| H | -6.58076772  | 3.37494563  | 3.56458884  |
| H | -5.03503072  | 2.57593663  | 3.16336884  |
| C | -6.65530272  | 1.20039563  | 3.76214984  |
| H | -7.08105572  | 1.40892963  | 4.74530084  |
| H | -5.86053272  | 0.46195163  | 3.88532884  |
| C | -9.55716972  | -1.03868737 | 1.07569184  |
| C | -9.48396072  | -2.26798637 | 0.16571684  |
| C | -7.91352472  | -4.48846137 | -1.59030116 |

|   |              |             |             |
|---|--------------|-------------|-------------|
| H | -8.58017872  | -3.67348937 | -1.84388216 |
| C | -7.94420172  | -5.66012637 | -2.28949616 |
| H | -8.62938772  | -5.77419737 | -3.12465516 |
| C | -7.12755372  | -7.96627337 | -2.66887816 |
| H | -7.81264172  | -8.05268737 | -3.50804116 |
| C | -6.32493172  | -9.01799737 | -2.30914616 |
| H | -6.36061272  | -9.95035237 | -2.86306016 |
| C | -5.45563972  | -8.88870937 | -1.20135316 |
| H | -4.83232872  | -9.72761937 | -0.90830516 |
| C | -5.39432272  | -7.71691437 | -0.48984816 |
| H | -4.72781972  | -7.63516237 | 0.36232384  |
| C | -6.20116172  | -6.60166237 | -0.85022016 |
| C | -5.70446772  | -4.96970737 | 2.30935284  |
| H | -4.95221172  | -4.74609437 | 3.06350684  |
| C | -7.10330972  | -4.75642537 | 2.71883884  |
| C | -8.17821372  | -5.50032037 | 2.21257684  |
| H | -7.98251072  | -6.34826537 | 1.56394984  |
| C | -9.48637972  | -5.14345037 | 2.51844584  |
| H | -10.30919572 | -5.71363037 | 2.10014584  |
| C | -9.74637272  | -4.05075437 | 3.34554084  |
| H | -10.76978572 | -3.76376337 | 3.56340884  |
| C | -8.68581972  | -3.32887437 | 3.88591284  |
| H | -8.87735872  | -2.47537437 | 4.52938084  |
| C | -7.37612872  | -3.68501737 | 3.57981884  |
| H | -6.54995872  | -3.09715237 | 3.97322284  |
| C | -1.37318272  | -6.53366037 | 3.39394284  |
| H | -1.28746072  | -6.95501337 | 4.39045984  |
| C | -2.62264672  | -6.20804437 | 2.89709184  |
| H | -3.51390772  | -6.38735137 | 3.48945084  |
| C | -3.26301672  | -4.83927937 | -0.42345616 |
| H | -3.75426972  | -4.47390137 | -1.31480616 |
| C | -8.10400872  | -1.19876537 | 1.31037184  |
| C | -7.02373472  | -4.34040437 | -0.49235916 |
| C | -7.09276472  | -6.74499737 | -1.94988016 |

### TS3'

|                                            |                             |
|--------------------------------------------|-----------------------------|
| Zero-point correction=                     | 1.070077 (Hartree/Particle) |
| Thermal correction to Energy=              | 1.126667                    |
| Thermal correction to Enthalpy=            | 1.127532                    |
| Thermal correction to Gibbs Free Energy=   | 0.978251                    |
| Sum of electronic and zero-point Energies= | -3582.900138                |
| Sum of electronic and thermal Energies=    | -3582.843548                |
| Sum of electronic and thermal Enthalpies=  | -3582.842683                |



Sum of electronic and thermal Free Energies= -3582.991965

SCF Done: E(RM062X) = -3584.96397884

|   |             |             |             |
|---|-------------|-------------|-------------|
| C | -2.11373391 | 0.07510730  | 0.00000000  |
| C | -0.96103191 | -0.55316870 | -0.59157800 |
| C | 0.03501209  | -1.18391470 | -0.88012400 |
| C | 1.15877609  | -2.02344070 | -1.16779000 |
| C | 0.94909509  | -3.30179070 | -1.70690200 |
| C | 2.46234509  | -1.60315770 | -0.86623700 |
| C | 2.03478609  | -4.13463070 | -1.95267900 |
| H | -0.06956491 | -3.62211170 | -1.90146900 |
| C | 3.53993209  | -2.44717970 | -1.10982100 |
| H | 2.61189309  | -0.61786470 | -0.43584700 |
| C | 3.32951409  | -3.71181270 | -1.65708200 |
| H | 1.86890609  | -5.12197270 | -2.37156400 |
| H | 4.54763009  | -2.11531870 | -0.87880500 |
| H | 4.17285609  | -4.36701670 | -1.85032600 |
| C | -1.80136791 | 0.76696930  | 1.25393700  |
| O | -2.56103491 | 1.64515930  | 1.75408400  |
| N | -0.70963491 | 0.33028530  | 1.92219000  |
| H | -0.10591991 | -0.32279970 | 1.42370100  |
| C | -0.29792991 | 0.58906830  | 3.22323700  |
| C | 0.97893209  | 0.02469730  | 3.56072300  |
| C | -1.01538791 | 1.26950430  | 4.18435400  |
| C | 1.50025609  | 0.20114130  | 4.86571100  |
| C | -0.47597591 | 1.43460730  | 5.48183100  |
| H | -2.00408291 | 1.63673030  | 3.94682400  |
| C | 2.78723409  | -1.21790170 | 2.88664600  |
| C | 2.76253809  | -0.38544970 | 5.13513300  |
| C | 0.75070209  | 0.92820130  | 5.82560800  |
| H | -1.06309791 | 1.97107430  | 6.22043700  |
| C | 3.40691109  | -1.09199970 | 4.15386400  |
| H | 3.26909009  | -1.78277670 | 2.09038100  |
| H | 3.19949809  | -0.27039670 | 6.12332100  |
| H | 1.15408509  | 1.06102130  | 6.82459700  |
| H | 4.37036009  | -1.55622470 | 4.33050500  |
| N | 1.62561809  | -0.68070570 | 2.59517000  |
| C | -3.08001691 | 0.79786330  | -0.91864700 |
| H | -2.82324191 | 0.59532130  | -1.95955200 |
| H | -3.07236491 | 1.88123930  | -0.76256700 |
| C | -3.58365791 | -1.16766970 | 1.91631900  |
| C | -2.61133391 | -1.90642270 | 2.61023600  |
| C | -2.55003291 | -1.92837370 | 3.99473500  |
| C | -3.51965391 | -1.20523370 | 4.69853700  |

|   |             |             |             |
|---|-------------|-------------|-------------|
| C | -4.53594191 | -0.52719670 | 4.03111100  |
| C | -4.57604191 | -0.52702270 | 2.63129600  |
| C | -3.34370591 | -1.36664870 | 0.43809100  |
| C | -2.41652391 | -2.59057570 | 0.44344000  |
| H | -1.79270791 | -2.50478970 | 4.51584600  |
| H | -3.49164691 | -1.20199870 | 5.78358500  |
| H | -5.31124791 | -0.01245470 | 4.59137800  |
| H | -5.40874291 | -0.08176170 | 2.09535500  |
| N | -1.83295891 | -2.62908570 | 1.70032400  |
| O | -2.18161991 | -3.36351570 | -0.46135600 |
| N | -4.22503891 | -1.21839270 | -0.55225500 |
| C | -4.49384491 | 0.16639930  | -0.64205600 |
| H | -4.90024091 | 0.67221430  | 0.25835800  |
| C | -5.47947291 | 0.49186830  | -1.73602700 |
| F | -5.64687091 | 1.84089530  | -1.82197300 |
| F | -6.69501591 | -0.02599970 | -1.49143500 |
| F | -5.09274491 | 0.07181230  | -2.93913200 |
| C | -0.77546091 | -3.54105470 | 2.06047200  |
| H | 0.07865509  | -2.98477770 | 2.46200100  |
| H | -1.12503391 | -4.27066970 | 2.79875000  |
| H | -0.47111891 | -4.05889970 | 1.14906700  |
| H | -2.83857091 | 2.91146130  | 1.08671600  |
| O | -9.22157091 | 2.29905530  | -1.29212600 |
| N | -3.01064891 | 3.97936530  | 0.92580800  |
| O | -7.16040691 | 4.61335130  | -0.26896100 |
| N | -8.01625091 | 0.29605630  | 1.19748800  |
| H | -7.50411291 | 0.07422230  | 2.04607300  |
| N | -5.16348391 | -3.82327570 | 0.51772900  |
| H | -4.57407791 | -3.80001870 | -0.30651200 |
| C | -3.58793391 | -5.51172770 | 3.41429100  |
| H | -2.76899891 | -6.15989270 | 3.71245500  |
| C | -3.72096091 | -5.15053970 | 2.08263100  |
| H | -3.02106691 | -5.48250370 | 1.32092600  |
| C | -4.79008691 | -4.31759270 | 1.74819000  |
| C | -5.71414591 | -3.83435270 | 2.70833600  |
| C | -6.65628691 | -3.00600070 | 1.98719600  |
| C | -7.78177391 | -2.21342570 | 2.47908100  |
| C | -8.82999391 | -1.94472270 | 1.44681500  |
| C | -7.82794991 | 1.52130130  | 0.67927400  |
| C | -5.20925491 | 3.94060730  | 1.88730400  |
| H | -5.94763491 | 4.73793630  | 1.98429900  |
| C | -4.44429391 | 4.16312030  | 0.56083300  |
| H | -4.72212991 | 3.45369730  | -0.22306000 |
| H | -4.58677391 | 5.18025230  | 0.18620400  |

|   |              |             |             |
|---|--------------|-------------|-------------|
| C | -2.04364291  | 4.50177030  | -0.05533300 |
| H | -1.03419991  | 4.25364630  | 0.27596800  |
| H | -2.15826691  | 5.58513430  | -0.13630500 |
| H | -2.23426791  | 4.03837630  | -1.02405600 |
| N | -5.93172891  | 2.67751330  | 1.95974800  |
| H | -5.35715591  | 1.86750530  | 2.18041600  |
| C | -2.88399591  | 4.54549230  | 2.29900600  |
| H | -2.87853691  | 5.63739730  | 2.21714900  |
| H | -1.94822691  | 4.19638530  | 2.74019800  |
| C | -4.13476391  | 4.01511330  | 2.99544300  |
| H | -4.43955291  | 4.64588430  | 3.83026900  |
| H | -3.93806691  | 3.00803830  | 3.37619500  |
| C | -7.42854491  | 3.47121330  | 0.04114100  |
| C | -8.39872391  | 2.39030330  | -0.42174700 |
| C | -9.81599391  | -0.52113770 | -0.27061900 |
| H | -9.83992991  | 0.42673630  | -0.79315400 |
| C | -10.66779891 | -1.52547570 | -0.63411100 |
| H | -11.37315191 | -1.36295370 | -1.44401900 |
| C | -11.54383091 | -3.82717570 | -0.34350200 |
| H | -12.25240591 | -3.64796370 | -1.14753200 |
| C | -11.50922391 | -5.03477470 | 0.30445500  |
| H | -12.19193291 | -5.82862470 | 0.01972600  |
| C | -10.57948291 | -5.24835070 | 1.34939800  |
| H | -10.55699291 | -6.20631370 | 1.85880900  |
| C | -9.70604991  | -4.25888370 | 1.72315600  |
| H | -8.99377091  | -4.42941970 | 2.52418800  |
| C | -9.71790591  | -2.99756570 | 1.06693100  |
| C | -7.82132491  | -1.73553970 | 3.74470600  |
| H | -6.94123691  | -1.92534670 | 4.35586700  |
| C | -8.85890391  | -0.92681970 | 4.40346100  |
| C | -10.20225791 | -0.87076170 | 3.99694200  |
| H | -10.54160791 | -1.47439070 | 3.16342900  |
| C | -11.11247191 | -0.06619070 | 4.67250800  |
| H | -12.14619091 | -0.04103570 | 4.34253300  |
| C | -10.71402391 | 0.69405530  | 5.76988100  |
| H | -11.43096491 | 1.31945130  | 6.29176400  |
| C | -9.39142491  | 0.63106830  | 6.19992900  |
| H | -9.06986991  | 1.20502630  | 7.06342100  |
| C | -8.48085991  | -0.17418570 | 5.52705300  |
| H | -7.45236891  | -0.23339170 | 5.87548300  |
| C | -4.50867091  | -5.07078670 | 4.38256400  |
| H | -4.38840491  | -5.38944370 | 5.41304800  |
| C | -5.56686891  | -4.24311170 | 4.04319600  |
| H | -6.27725691  | -3.92853770 | 4.80082800  |

|   |              |             |             |
|---|--------------|-------------|-------------|
| C | -6.26015591  | -3.03127870 | 0.66711900  |
| H | -6.65835491  | -2.48577770 | -0.17628800 |
| C | -6.92569391  | 2.52156930  | 1.03528000  |
| C | -8.89156791  | -0.73016570 | 0.78617100  |
| C | -10.65556991 | -2.78394070 | 0.02105300  |

**TS3"**

|                                              |                             |
|----------------------------------------------|-----------------------------|
| Zero-point correction=                       | 1.071371 (Hartree/Particle) |
| Thermal correction to Energy=                | 1.127701                    |
| Thermal correction to Enthalpy=              | 1.128566                    |
| Thermal correction to Gibbs Free Energy=     | 0.980618                    |
| Sum of electronic and zero-point Energies=   | -3582.920273                |
| Sum of electronic and thermal Energies=      | -3582.863943                |
| Sum of electronic and thermal Enthalpies=    | -3582.863078                |
| Sum of electronic and thermal Free Energies= | -3583.011026                |
| SCF Done: E(RM062X) =                        | -3584.98569766              |

|   |             |             |             |
|---|-------------|-------------|-------------|
| C | -2.62875537 | -0.03218884 | 0.00000000  |
| C | -1.47336337 | 0.27612216  | 0.80678400  |
| C | -0.47512537 | 0.61994016  | 1.40357200  |
| C | 0.70589763  | 1.09961216  | 2.05332300  |
| C | 0.76914263  | 1.22361216  | 3.44784700  |
| C | 1.81017963  | 1.48218616  | 1.27545500  |
| C | 1.91920063  | 1.71963116  | 4.05079000  |
| H | -0.08819537 | 0.93141916  | 4.04493700  |
| C | 2.95555863  | 1.97386716  | 1.88815000  |
| H | 1.74465263  | 1.38548616  | 0.19521400  |
| C | 3.01429563  | 2.09485116  | 3.27574800  |
| H | 1.96062963  | 1.81356816  | 5.13113300  |
| H | 3.80801463  | 2.26407416  | 1.28155700  |
| H | 3.91031863  | 2.48023516  | 3.75120300  |
| C | -2.24543637 | -0.44459684 | -1.37311100 |
| O | -2.94352237 | -1.19574284 | -2.08887700 |
| N | -1.14591437 | 0.18155916  | -1.86586900 |
| H | -0.62007937 | 0.75521916  | -1.20654500 |
| C | -0.82909137 | 0.45470416  | -3.19365100 |
| C | 0.20668063  | 1.43728216  | -3.36131400 |
| C | -1.45072737 | -0.07283584 | -4.30518200 |
| C | 0.54199163  | 1.88466116  | -4.66268600 |
| C | -1.08466337 | 0.37286316  | -5.59798400 |
| H | -2.23379937 | -0.80637484 | -4.18015700 |
| C | 1.71900363  | 2.84719916  | -2.36905400 |
| C | 1.53801763  | 2.88924516  | -4.75851900 |

|   |              |             |             |
|---|--------------|-------------|-------------|
| C | -0.12290537  | 1.33053716  | -5.78726700 |
| H | -1.59542537  | -0.05421484 | -6.45496000 |
| C | 2.12307063   | 3.37538316  | -3.61916100 |
| H | 2.16492763   | 3.21782016  | -1.44753000 |
| H | 1.82106363   | 3.26207316  | -5.73899800 |
| H | 0.14081663   | 1.67399616  | -6.78256700 |
| H | 2.88352763   | 4.14679916  | -3.65819300 |
| N | 0.80516963   | 1.91566016  | -2.23954100 |
| C | -3.67472737  | -0.87804284 | 0.70605500  |
| H | -3.37507437  | -1.04362584 | 1.74161300  |
| H | -3.81194937  | -1.85479784 | 0.23625400  |
| C | -2.68343037  | 2.66752116  | -0.07462500 |
| C | -2.41231137  | 3.12875116  | -1.36576600 |
| C | -1.49388937  | 4.13612116  | -1.61517400 |
| C | -0.85387737  | 4.70127616  | -0.50727200 |
| C | -1.13471737  | 4.27336516  | 0.79170500  |
| C | -2.05535637  | 3.24096416  | 1.01496500  |
| C | -3.63007837  | 1.51073216  | -0.14540000 |
| C | -4.05323637  | 1.57121516  | -1.65219600 |
| H | -1.29881437  | 4.49205016  | -2.62222000 |
| H | -0.12938837  | 5.49495516  | -0.66514800 |
| H | -0.62252237  | 4.73081016  | 1.63193400  |
| H | -2.28526337  | 2.88082216  | 2.01237100  |
| N | -3.23321137  | 2.46181816  | -2.28879300 |
| O | -4.98593937  | 0.99517116  | -2.21447500 |
| N | -4.56313637  | 1.33071316  | 0.81839900  |
| C | -4.99105637  | -0.01761284 | 0.69674500  |
| H | -5.53529237  | -0.28147184 | -0.22557200 |
| C | -5.89430037  | -0.45221484 | 1.82606300  |
| F | -6.25176937  | -1.75392684 | 1.63839200  |
| F | -7.02889937  | 0.24963016  | 1.90090400  |
| F | -5.30309237  | -0.38697084 | 3.02431900  |
| C | -3.35593437  | 2.84501216  | -3.67856000 |
| H | -3.66841937  | 3.89215416  | -3.75832300 |
| H | -2.40062037  | 2.70281316  | -4.19570400 |
| H | -4.11003237  | 2.19843516  | -4.12901700 |
| H | -3.77650537  | -2.45345684 | -1.64408800 |
| O | -10.05076237 | -0.87074384 | 0.66950500  |
| N | -4.15775937  | -3.44857884 | -1.74493800 |
| O | -8.63895237  | -3.35662384 | -0.96571200 |
| N | -7.70259937  | 1.17044316  | -0.72794500 |
| H | -6.88051137  | 1.38581516  | -1.29126100 |
| N | -4.19910537  | 5.44963716  | -0.30038000 |
| H | -3.43971237  | 5.48004816  | 0.36548800  |

|   |              |             |             |
|---|--------------|-------------|-------------|
| C | -3.51420237  | 7.40276216  | -3.37592600 |
| H | -2.84244137  | 8.12743016  | -3.82474300 |
| C | -3.28350637  | 6.97200816  | -2.08036200 |
| H | -2.44395437  | 7.34151316  | -1.49955900 |
| C | -4.17113237  | 6.03519516  | -1.54269100 |
| C | -5.25838337  | 5.51405116  | -2.28417100 |
| C | -5.92208137  | 4.55725616  | -1.43148900 |
| C | -7.11271437  | 3.75427816  | -1.74009200 |
| C | -8.07606837  | 3.54016516  | -0.61837900 |
| C | -8.11776737  | -0.10259984 | -0.76836900 |
| C | -6.23372037  | -2.71858984 | -2.67855700 |
| H | -7.13684737  | -3.25436584 | -2.97542300 |
| C | -5.62513137  | -3.45374284 | -1.46266600 |
| H | -5.82773437  | -2.95501684 | -0.51084300 |
| H | -5.95708837  | -4.49446584 | -1.40655700 |
| C | -3.35122937  | -4.35619484 | -0.90713000 |
| H | -2.29673737  | -4.20987684 | -1.14505400 |
| H | -3.64705437  | -5.38760584 | -1.10898700 |
| H | -3.52779537  | -4.12026284 | 0.14280800  |
| N | -6.60155937  | -1.34815284 | -2.38965800 |
| H | -5.87065237  | -0.63486984 | -2.41333600 |
| C | -4.06159737  | -3.69345884 | -3.21474000 |
| H | -4.28317037  | -4.75082584 | -3.39086300 |
| H | -3.04794237  | -3.46060484 | -3.54446100 |
| C | -5.13730437  | -2.76381184 | -3.77026900 |
| H | -5.51757137  | -3.10650584 | -4.73243400 |
| H | -4.71926537  | -1.76038984 | -3.89824700 |
| C | -8.51528037  | -2.14826584 | -0.89296800 |
| C | -9.14999437  | -0.99138284 | -0.11884400 |
| C | -9.22301037  | 2.07119816  | 0.96209800  |
| H | -9.39796637  | 1.06981916  | 1.33330900  |
| C | -9.85045437  | 3.14168116  | 1.53014500  |
| H | -10.52926637 | 2.98856616  | 2.36423600  |
| C | -10.30478637 | 5.57271916  | 1.62869800  |
| H | -10.97969737 | 5.39569416  | 2.46185700  |
| C | -10.11360137 | 6.83868616  | 1.13861300  |
| H | -10.63182237 | 7.68304116  | 1.58140700  |
| C | -9.24354337  | 7.04127016  | 0.04265000  |
| H | -9.10400337  | 8.04200016  | -0.35382900 |
| C | -8.57459237  | 5.98704316  | -0.52681200 |
| H | -7.91493237  | 6.15963116  | -1.37064300 |
| C | -8.73809437  | 4.66441916  | -0.02851900 |
| C | -7.26473437  | 3.20684516  | -2.96398100 |
| H | -6.44118137  | 3.31868116  | -3.66819600 |

|   |              |             |             |
|---|--------------|-------------|-------------|
| C | -8.37523137  | 2.33759116  | -3.38974400 |
| C | -9.71323937  | 2.62182216  | -3.08975500 |
| H | -9.95910437  | 3.55342516  | -2.58901800 |
| C | -10.71436637 | 1.71491816  | -3.41816900 |
| H | -11.74681237 | 1.94331416  | -3.17391700 |
| C | -10.39763037 | 0.51323016  | -4.05031600 |
| H | -11.18118937 | -0.19763984 | -4.29185300 |
| C | -9.07204037  | 0.23019916  | -4.36866600 |
| H | -8.81388537  | -0.70719784 | -4.85238300 |
| C | -8.07041437  | 1.14141816  | -4.05039400 |
| H | -7.02961437  | 0.91016116  | -4.26556500 |
| C | -4.61429137  | 6.92839416  | -4.11770200 |
| H | -4.77826337  | 7.30447516  | -5.12230200 |
| C | -5.48835637  | 5.99618316  | -3.58379800 |
| H | -6.33889137  | 5.63868916  | -4.15665300 |
| C | -5.23263537  | 4.54903616  | -0.24260600 |
| H | -5.38239237  | 3.91523316  | 0.62371900  |
| C | -7.60190137  | -1.17752984 | -1.48810700 |
| C | -8.33256837  | 2.26964316  | -0.12575200 |
| C | -9.63552437  | 4.46208316  | 1.05580200  |

### TS3-H

|                                              |                             |
|----------------------------------------------|-----------------------------|
| Zero-point correction=                       | 1.067869 (Hartree/Particle) |
| Thermal correction to Energy=                | 1.124030                    |
| Thermal correction to Enthalpy=              | 1.124895                    |
| Thermal correction to Gibbs Free Energy=     | 0.980131                    |
| Sum of electronic and zero-point Energies=   | -3582.960494                |
| Sum of electronic and thermal Energies=      | -3582.904334                |
| Sum of electronic and thermal Enthalpies=    | -3582.903469                |
| Sum of electronic and thermal Free Energies= | -3583.048232                |
| SCF Done: E(RM062X) =                        | -3585.00381951              |

|   |             |             |             |
|---|-------------|-------------|-------------|
| C | -2.01716739 | -2.11373387 | 0.00000000  |
| C | -3.17081339 | -1.95280187 | -0.76862700 |
| C | -4.23994939 | -1.83860787 | -1.35335300 |
| C | -5.54384439 | -1.69719487 | -1.90173000 |
| C | -5.79441239 | -1.79813187 | -3.28090900 |
| C | -6.62626439 | -1.46945887 | -1.02634700 |
| C | -7.08936339 | -1.67166787 | -3.76743600 |
| H | -4.96493539 | -1.97358287 | -3.95785100 |
| C | -7.91479339 | -1.33489487 | -1.52905400 |
| H | -6.42225339 | -1.40910487 | 0.04097400  |
| C | -8.15460639 | -1.43720987 | -2.89861100 |

|   |             |             |             |
|---|-------------|-------------|-------------|
| H | -7.26915039 | -1.75100887 | -4.83495600 |
| H | -8.74008239 | -1.15073987 | -0.84677700 |
| H | -9.16223539 | -1.33321687 | -3.28677600 |
| C | -2.08956039 | -1.94392487 | 1.42432500  |
| O | -1.08180439 | -1.95692787 | 2.17743200  |
| N | -3.36173739 | -1.77971487 | 1.94441700  |
| H | -4.13344539 | -1.80092987 | 1.28343400  |
| C | -3.75677739 | -1.68901787 | 3.26188400  |
| C | -5.18278639 | -1.69342287 | 3.48012100  |
| C | -2.91685339 | -1.64133387 | 4.36192400  |
| C | -5.69476839 | -1.60208187 | 4.80137100  |
| C | -3.45213839 | -1.53472287 | 5.66482700  |
| H | -1.84965439 | -1.69261487 | 4.20490800  |
| C | -7.28638639 | -1.88916887 | 2.57955800  |
| C | -7.10286439 | -1.64733387 | 4.95125700  |
| C | -4.80325939 | -1.50512887 | 5.89913500  |
| H | -2.75966739 | -1.47860387 | 6.49938500  |
| C | -7.90245739 | -1.79618487 | 3.84832000  |
| H | -7.89655039 | -2.01920687 | 1.68521200  |
| H | -7.52904139 | -1.57085887 | 5.94812600  |
| H | -5.20292239 | -1.42324087 | 6.90497900  |
| H | -8.98247639 | -1.84365387 | 3.93183700  |
| N | -5.98861339 | -1.83193987 | 2.39609000  |
| C | -0.77812839 | -2.63469387 | -0.62787500 |
| H | 0.09669861  | -2.45748087 | -0.00116800 |
| H | -0.60108239 | -2.19321387 | -1.61279200 |
| C | -3.50251839 | -4.82899387 | 0.59051800  |
| C | -4.28083739 | -4.86997787 | 1.77240200  |
| C | -5.66035539 | -4.88893587 | 1.76218400  |
| C | -6.29974339 | -4.86973487 | 0.51870300  |
| C | -5.56559839 | -4.86098387 | -0.66152400 |
| C | -4.16962839 | -4.83652487 | -0.63622800 |
| C | -2.10097639 | -4.82240687 | 1.02936500  |
| C | -2.14728239 | -4.89151087 | 2.54670100  |
| H | -6.22572539 | -4.89365287 | 2.68822700  |
| H | -7.38412739 | -4.86059687 | 0.47709800  |
| H | -6.07795039 | -4.83385787 | -1.61698000 |
| H | -3.63798839 | -4.81510787 | -1.57831400 |
| N | -3.45840739 | -4.89817587 | 2.90671600  |
| O | -1.18701839 | -4.88844387 | 3.29463100  |
| N | -0.93545239 | -4.79696387 | 0.46026800  |
| C | -0.88152439 | -4.20012687 | -0.84223800 |
| H | -1.76996139 | -4.39915487 | -1.44536300 |
| C | 0.28321661  | -4.71582687 | -1.64841300 |



|   |             |             |             |
|---|-------------|-------------|-------------|
| F | 0.31821261  | -4.14647387 | -2.85481700 |
| F | 0.21549961  | -6.04657987 | -1.83138200 |
| F | 1.46109061  | -4.46556287 | -1.04647000 |
| C | -3.91874839 | -4.93352487 | 4.27698700  |
| H | -4.60816339 | -4.10708987 | 4.46917500  |
| H | -4.41559539 | -5.88543087 | 4.48938400  |
| H | -3.04294939 | -4.82088987 | 4.91583000  |
| H | 0.38081961  | -5.14250787 | 1.26656600  |
| O | 3.87268361  | 0.43244313  | -0.16399800 |
| N | 1.43343161  | -5.75441587 | 1.69077900  |
| O | 4.62238161  | -2.41753487 | 1.29639200  |
| N | 0.66529461  | -0.06177787 | 0.75030900  |
| H | -0.07135439 | -0.44958487 | 1.34322200  |
| N | -4.68637139 | 1.01866013  | 0.36213600  |
| H | -5.27108839 | 0.75854913  | -0.41772800 |
| C | -6.55488439 | 1.51987513  | 3.52248800  |
| H | -7.54687339 | 1.53238313  | 3.96299400  |
| C | -6.41374439 | 1.26245713  | 2.17049100  |
| H | -7.27340239 | 1.06990513  | 1.53461700  |
| C | -5.11691139 | 1.23873013  | 1.65015800  |
| C | -3.97238339 | 1.48578813  | 2.44647300  |
| C | -2.82913539 | 1.41409313  | 1.56597100  |
| C | -1.40123039 | 1.54866113  | 1.88040700  |
| C | -0.53970039 | 2.02938813  | 0.75742300  |
| C | 1.86296361  | -0.66800887 | 0.87717800  |
| C | 2.41376961  | -3.89349787 | 2.75717000  |
| H | 3.37192861  | -3.50363787 | 3.10302100  |
| C | 2.65280161  | -4.89875887 | 1.62983600  |
| H | 2.77834061  | -4.43517587 | 0.65554200  |
| H | 3.51834261  | -5.53812087 | 1.84435000  |
| C | 1.51816761  | -6.97184787 | 0.86496700  |
| H | 0.57119761  | -7.51108887 | 0.92870700  |
| H | 2.33093061  | -7.60550387 | 1.23160500  |
| H | 1.70491161  | -6.69306487 | -0.16998800 |
| N | 1.60730861  | -2.77792387 | 2.28902600  |
| H | 0.58903361  | -2.76255487 | 2.38536800  |
| C | 1.33404461  | -6.05048387 | 3.15185700  |
| H | 2.09103361  | -6.81517087 | 3.36379600  |
| H | 0.34445661  | -6.42856287 | 3.39293800  |
| C | 1.68002861  | -4.72099487 | 3.83577200  |
| H | 2.32052061  | -4.88947787 | 4.70268500  |
| H | 0.77677461  | -4.20804687 | 4.16510700  |
| C | 3.63253961  | -1.73136887 | 1.13675000  |
| C | 3.27392161  | -0.41677587 | 0.44955500  |

|   |             |             |             |
|---|-------------|-------------|-------------|
| C | 1.22520761  | 1.65529813  | -0.88839000 |
| H | 1.98626461  | 1.00011913  | -1.29182900 |
| C | 1.02819961  | 2.89782213  | -1.41735100 |
| H | 1.62851861  | 3.22950413  | -2.25963600 |
| C | -0.15005739 | 5.07510513  | -1.41841400 |
| H | 0.46224861  | 5.38760413  | -2.26008900 |
| C | -1.08172339 | 5.92238913  | -0.87709200 |
| H | -1.22297639 | 6.91706713  | -1.28721200 |
| C | -1.85407039 | 5.50001213  | 0.22979000  |
| H | -2.58028539 | 6.17793813  | 0.66689500  |
| C | -1.69403439 | 4.24438013  | 0.75899200  |
| H | -2.29000739 | 3.93552213  | 1.61104600  |
| C | -0.74722239 | 3.33586913  | 0.20841300  |
| C | -0.91306239 | 1.15694913  | 3.07699600  |
| H | -1.60935439 | 0.68481313  | 3.76756100  |
| C | 0.50507161  | 1.13099813  | 3.47294400  |
| C | 1.41562761  | 2.14031413  | 3.13007100  |
| H | 1.05671061  | 3.03377413  | 2.62890900  |
| C | 2.76912161  | 1.99357713  | 3.41077000  |
| H | 3.46455261  | 2.77450213  | 3.12095500  |
| C | 3.23750261  | 0.84766213  | 4.05352900  |
| H | 4.29699861  | 0.73219513  | 4.25771300  |
| C | 2.33694461  | -0.14423987 | 4.43167600  |
| H | 2.69017961  | -1.04162887 | 4.93190900  |
| C | 0.98260561  | -0.00060087 | 4.14707200  |
| H | 0.28513661  | -0.79471387 | 4.40222500  |
| C | -5.43144739 | 1.76637313  | 4.33688900  |
| H | -5.57641639 | 1.96710613  | 5.39359400  |
| C | -4.15018939 | 1.75699813  | 3.81424200  |
| H | -3.29547939 | 1.96387513  | 4.44996900  |
| C | -3.32348539 | 1.13803813  | 0.31407100  |
| H | -2.78543939 | 0.98816613  | -0.61108800 |
| C | 2.22050261  | -1.84666687 | 1.53536200  |
| C | 0.44616361  | 1.21817213  | 0.21607900  |
| C | 0.04599561  | 3.77499313  | -0.88737700 |

## F

|                                            |                             |
|--------------------------------------------|-----------------------------|
| Zero-point correction=                     | 1.073434 (Hartree/Particle) |
| Thermal correction to Energy=              | 1.130180                    |
| Thermal correction to Enthalpy=            | 1.131045                    |
| Thermal correction to Gibbs Free Energy=   | 0.982892                    |
| Sum of electronic and zero-point Energies= | -3582.990252                |
| Sum of electronic and thermal Energies=    | -3582.933506                |

Sum of electronic and thermal Enthalpies= -3582.932641  
 Sum of electronic and thermal Free Energies= -3583.080794  
 SCF Done: E(RM062X) = -3585.03963857

|   |             |             |             |
|---|-------------|-------------|-------------|
| C | -3.35836911 | 0.18240343  | 0.00000000  |
| C | -4.52731311 | 0.96364243  | -0.39038100 |
| C | -5.52316211 | 1.60630943  | -0.63428900 |
| C | -6.66989511 | 2.43841543  | -0.85322100 |
| C | -7.42343311 | 2.35142043  | -2.03038300 |
| C | -7.02724511 | 3.36519543  | 0.13878100  |
| C | -8.51798111 | 3.18847043  | -2.21253600 |
| H | -7.14530211 | 1.62509443  | -2.78658200 |
| C | -8.12225911 | 4.19912743  | -0.05592300 |
| H | -6.43542211 | 3.40655143  | 1.05075800  |
| C | -8.86784111 | 4.11351743  | -1.23043100 |
| H | -9.10049311 | 3.12018443  | -3.12524100 |
| H | -8.39564711 | 4.91645943  | 0.71229300  |
| H | -9.72171311 | 4.76581543  | -1.38043600 |
| C | -2.68614411 | 0.78256043  | 1.25657900  |
| O | -1.50683411 | 0.53548743  | 1.48511700  |
| N | -3.49177511 | 1.50710843  | 2.05535300  |
| H | -4.44193811 | 1.69519643  | 1.74541400  |
| C | -3.19555211 | 2.05388143  | 3.30511600  |
| C | -4.28475411 | 2.75557943  | 3.92068200  |
| C | -1.98555611 | 1.95830643  | 3.95544500  |
| C | -4.09322111 | 3.36626343  | 5.18476500  |
| C | -1.81362911 | 2.58787743  | 5.21231600  |
| H | -1.16658811 | 1.41809943  | 3.49961900  |
| C | -6.48185111 | 3.40627943  | 3.82870900  |
| C | -5.20514111 | 4.03324343  | 5.75308500  |
| C | -2.82755111 | 3.28219643  | 5.81778700  |
| H | -0.84605511 | 2.51134643  | 5.69899400  |
| C | -6.40076611 | 4.05173543  | 5.08375700  |
| H | -7.42080611 | 3.40952143  | 3.27585900  |
| H | -5.09343811 | 4.51900443  | 6.71869300  |
| H | -2.68340211 | 3.76196143  | 6.78087400  |
| H | -7.27334411 | 4.54763743  | 5.49339300  |
| N | -5.47323311 | 2.78552543  | 3.26211800  |
| C | -2.29841911 | 0.01985243  | -1.12259900 |
| H | -1.40647311 | 0.60489643  | -0.88328300 |
| H | -2.69322411 | 0.35935343  | -2.08148800 |
| C | -4.94399511 | -1.81414057 | -0.45175000 |
| C | -5.91687911 | -2.22727157 | 0.46484500  |
| C | -7.15834511 | -2.69621857 | 0.06852700  |

|   |             |             |             |
|---|-------------|-------------|-------------|
| C | -7.42077611 | -2.73981457 | -1.30336000 |
| C | -6.47336611 | -2.31822457 | -2.23046600 |
| C | -5.22731611 | -1.84381757 | -1.80529700 |
| C | -3.72885211 | -1.34860257 | 0.32414900  |
| C | -4.15511711 | -1.60643157 | 1.78587800  |
| H | -7.89994311 | -3.01481257 | 0.79312500  |
| H | -8.38346911 | -3.10387857 | -1.64667800 |
| H | -6.70137911 | -2.35406657 | -3.28995600 |
| H | -4.50740811 | -1.48852857 | -2.53647600 |
| N | -5.43860411 | -2.08135057 | 1.77449800  |
| O | -3.45823611 | -1.44300557 | 2.76588200  |
| N | -2.52495111 | -2.10069857 | 0.05032800  |
| C | -1.96798911 | -1.49747657 | -1.14983200 |
| H | -2.41733511 | -1.96509057 | -2.03313000 |
| C | -0.48720011 | -1.77533057 | -1.25499900 |
| F | 0.05480289  | -1.08094657 | -2.26301500 |
| F | -0.24174411 | -3.07435257 | -1.47554700 |
| F | 0.15217089  | -1.43526357 | -0.12904100 |
| C | -6.15748311 | -2.46037057 | 2.96801200  |
| H | -7.08407411 | -1.88571957 | 3.05461500  |
| H | -6.39525611 | -3.52825757 | 2.95040900  |
| H | -5.51174111 | -2.24324357 | 3.81886900  |
| H | -1.87568411 | -2.02817357 | 0.84749800  |
| O | 4.25130889  | 0.72677143  | -0.31762800 |
| N | -0.62404111 | -3.30591357 | 2.25300100  |
| O | 4.12539989  | -1.37021357 | 2.25146600  |
| N | 0.98798289  | 1.37086143  | 0.22428400  |
| H | 0.17023289  | 1.43589143  | 0.82509100  |
| N | -3.69026511 | 4.26141343  | 0.03540600  |
| H | -4.47853511 | 4.10607443  | -0.57349400 |
| C | -4.52477311 | 6.25610543  | 3.04526500  |
| H | -5.32491811 | 6.78281243  | 3.55560600  |
| C | -4.78554511 | 5.62203043  | 1.84389000  |
| H | -5.77002111 | 5.65513543  | 1.38676500  |
| C | -3.72767911 | 4.94426843  | 1.22842100  |
| C | -2.42438811 | 4.90831443  | 1.78087700  |
| C | -1.59456611 | 4.16972843  | 0.85403600  |
| C | -0.16141411 | 3.86391243  | 0.95970700  |
| C | 0.59766289  | 3.68848043  | -0.31792200 |
| C | 1.97774989  | 0.58172043  | 0.71580900  |
| C | 1.04824989  | -2.02349357 | 3.25957500  |
| H | 2.03700489  | -2.05366757 | 3.72177300  |
| C | 0.83222589  | -3.20721257 | 2.30683900  |
| H | 1.26399489  | -3.04076657 | 1.31628700  |

|   |             |             |             |
|---|-------------|-------------|-------------|
| H | 1.27665189  | -4.12498857 | 2.73742800  |
| C | -1.09723111 | -4.49260357 | 1.56498600  |
| H | -2.19050211 | -4.51495957 | 1.58260200  |
| H | -0.71345611 | -5.41815957 | 2.03038900  |
| H | -0.78264711 | -4.46259357 | 0.51921300  |
| N | 0.92515589  | -0.74627357 | 2.55924100  |
| H | -0.01810511 | -0.54441357 | 2.23401700  |
| C | -1.01109611 | -3.27251657 | 3.66418100  |
| H | -0.78389011 | -4.24420457 | 4.14230900  |
| H | -2.07895511 | -3.07022157 | 3.76549700  |
| C | -0.12486211 | -2.16705057 | 4.26126500  |
| H | 0.22229289  | -2.42170657 | 5.26410600  |
| H | -0.67011211 | -1.22093457 | 4.32410400  |
| C | 3.35959189  | -0.66140157 | 1.64112500  |
| C | 3.41956589  | 0.33443943  | 0.46460600  |
| C | 2.00973389  | 2.31491243  | -1.76810500 |
| H | 2.48325089  | 1.35539643  | -1.94238400 |
| C | 2.19956389  | 3.36746643  | -2.61635900 |
| H | 2.82563889  | 3.25208043  | -3.49642000 |
| C | 1.77939289  | 5.72145243  | -3.25274300 |
| H | 2.39267689  | 5.57210443  | -4.13733200 |
| C | 1.21799789  | 6.94385443  | -2.98860200 |
| H | 1.37528089  | 7.77746043  | -3.66520300 |
| C | 0.44212089  | 7.12138243  | -1.81984500 |
| H | 0.01356389  | 8.09488143  | -1.60365200 |
| C | 0.22901789  | 6.07859243  | -0.95370000 |
| H | -0.36159711 | 6.23132243  | -0.05668300 |
| C | 0.77920789  | 4.79223543  | -1.21207200 |
| C | 0.40741089  | 3.69660543  | 2.17466800  |
| H | -0.25723211 | 3.73689243  | 3.03480200  |
| C | 1.79090189  | 3.30343143  | 2.48560900  |
| C | 2.90571889  | 3.68795443  | 1.72515400  |
| H | 2.78141389  | 4.38363343  | 0.90191800  |
| C | 4.16416889  | 3.17192543  | 2.01110700  |
| H | 5.01037689  | 3.45212943  | 1.39297900  |
| C | 4.33857089  | 2.27464543  | 3.06452200  |
| H | 5.31596789  | 1.84666743  | 3.26075500  |
| C | 3.24824989  | 1.92080343  | 3.85478200  |
| H | 3.37388489  | 1.21907443  | 4.67342100  |
| C | 1.99014589  | 2.44224343  | 3.57368900  |
| H | 1.13419289  | 2.13941343  | 4.17240500  |
| C | -3.23494611 | 6.24139443  | 3.61042700  |
| H | -3.06090211 | 6.76006043  | 4.54788800  |
| C | -2.18670611 | 5.58579943  | 2.98974700  |

|   |             |             |             |
|---|-------------|-------------|-------------|
| H | -1.19355911 | 5.60902943  | 3.42464100  |
| C | -2.41383611 | 3.81149443  | -0.19067900 |
| H | -2.16566311 | 3.27198343  | -1.09502700 |
| C | 1.91759389  | -0.35093657 | 1.73699300  |
| C | 1.19649189  | 2.47533343  | -0.61674500 |
| C | 1.58494689  | 4.62543943  | -2.37414500 |

**Pro**

|                                              |                             |
|----------------------------------------------|-----------------------------|
| Zero-point correction=                       | 0.489293 (Hartree/Particle) |
| Thermal correction to Energy=                | 0.516878                    |
| Thermal correction to Enthalpy=              | 0.517743                    |
| Thermal correction to Gibbs Free Energy=     | 0.430056                    |
| Sum of electronic and zero-point Energies=   | -1862.965003                |
| Sum of electronic and thermal Energies=      | -1862.937417                |
| Sum of electronic and thermal Enthalpies=    | -1862.936552                |
| Sum of electronic and thermal Free Energies= | -1863.024240                |
| SCF Done: E(RM062X) =                        | -1863.98014089              |

|   |             |             |             |
|---|-------------|-------------|-------------|
| C | -1.92060086 | 0.82618025  | 0.00000000  |
| C | -1.08248086 | 1.98301825  | -0.29551300 |
| C | -0.32011486 | 2.91169825  | -0.43784700 |
| C | 0.60031314  | 3.99913725  | -0.59548600 |
| C | 0.19653014  | 5.31308025  | -0.32675300 |
| C | 1.91762214  | 3.74247125  | -1.00089100 |
| C | 1.10234614  | 6.35762425  | -0.47012300 |
| H | -0.82309386 | 5.49561625  | -0.00193400 |
| C | 2.81534714  | 4.79398025  | -1.13996500 |
| H | 2.21791414  | 2.71647225  | -1.19124500 |
| C | 2.41005014  | 6.10149025  | -0.87696200 |
| H | 0.78763714  | 7.37511025  | -0.26262600 |
| H | 3.83366614  | 4.59386925  | -1.45827400 |
| H | 3.11346014  | 6.92026025  | -0.98822200 |
| C | -1.08043386 | -0.46921775 | 0.14158300  |
| O | -1.62991886 | -1.55467275 | 0.07302300  |
| N | 0.24072514  | -0.26913375 | 0.37163400  |
| H | 0.60213814  | 0.67936625  | 0.32587500  |
| C | 1.21021814  | -1.22467375 | 0.66522100  |
| C | 2.54476014  | -0.70900475 | 0.76965800  |
| C | 0.97588914  | -2.56690975 | 0.86652600  |
| C | 3.61014414  | -1.58964175 | 1.08281400  |
| C | 2.05588914  | -3.42829975 | 1.17326200  |
| H | -0.03258286 | -2.94795175 | 0.79153700  |
| C | 3.93886514  | 1.11083425  | 0.67139500  |

|   |             |             |             |
|---|-------------|-------------|-------------|
| C | 4.90420814  | -1.02129375 | 1.18175400  |
| C | 3.34224714  | -2.96781375 | 1.28123000  |
| H | 1.84528314  | -4.48143375 | 1.32813600  |
| C | 5.07353914  | 0.32339125  | 0.98003300  |
| H | 4.04554514  | 2.18238325  | 0.50799700  |
| H | 5.74736514  | -1.66426875 | 1.41950100  |
| H | 4.16236114  | -3.63837075 | 1.51841600  |
| H | 6.04977614  | 0.78909325  | 1.05131800  |
| N | 2.72456714  | 0.62393625  | 0.56551100  |
| C | -3.06841086 | 0.56278425  | -1.01220300 |
| H | -2.81292086 | -0.28304675 | -1.65235800 |
| H | -3.23885786 | 1.43938125  | -1.63900100 |
| C | -3.11469986 | 2.46355025  | 1.59020000  |
| C | -2.50789586 | 2.88463825  | 2.78048700  |
| C | -2.61293186 | 4.18459425  | 3.24737600  |
| C | -3.35220986 | 5.08785225  | 2.47863500  |
| C | -3.94870986 | 4.69494525  | 1.28511000  |
| C | -3.82281486 | 3.37681125  | 0.82991000  |
| C | -2.74126786 | 1.01400125  | 1.35974500  |
| C | -1.92860986 | 0.67691725  | 2.62759400  |
| H | -2.13655386 | 4.49166925  | 4.17217500  |
| H | -3.45638586 | 6.11264625  | 2.81999000  |
| H | -4.51244086 | 5.41297925  | 0.69990800  |
| H | -4.26657886 | 3.09346225  | -0.11918300 |
| N | -1.80755386 | 1.82559325  | 3.36781200  |
| O | -1.49521586 | -0.41492075 | 2.92149100  |
| N | -3.85907286 | 0.09370525  | 1.24827300  |
| C | -4.30795786 | 0.24177525  | -0.13229000 |
| H | -5.02880286 | 1.06461725  | -0.18048500 |
| C | -5.07352086 | -0.97736275 | -0.59495600 |
| F | -5.40153486 | -0.84501875 | -1.89138400 |
| F | -6.20850786 | -1.13186075 | 0.09650000  |
| F | -4.36530086 | -2.10227275 | -0.46635800 |
| C | -1.11931886 | 1.88437425  | 4.63512000  |
| H | -0.30616286 | 2.61507825  | 4.59637100  |
| H | -1.81238886 | 2.15723825  | 5.43679600  |
| H | -0.71119786 | 0.89202825  | 4.82739100  |
| H | -3.46664886 | -0.84621775 | 1.36259400  |

## 6. References

1. Z.-G. Ma, J.-L. Wei, J.-B. Lin, G.-J. Wang, J. Zhou, K. Chen, C.-A. Fan, S.-Y. Zhang, *Org. Lett.* **2019**, *21*, 2468-2472.
2. M. Ma, Y. Zhu, Q. Sun, X. Li, J. Su, L. Zhao, Y. Zhao, S. Qiu, W. Yan, K. Wang, R. Wang, *Chem. Commun.* **2015**, *51*, 8789-8792.
3. Z. Zhang, X. Li, M. Song, Y. Wan, D. Zheng, G. Zhang, G. Chen, *J. Org. Chem.* **2019**, *84*, 12792-12799.
4. W. Chen, W. Yang, L. Yan, C.-H. Tan, Z. Jiang, *Chem. Commun.* **2013**, *49*, 9854-9856.
5. Q.-Z. Li, P.-F. Lian, F.-X. Tan, G.-D. Zhu, C. Chen, Y. Hao, W. Jiang, X.-H. Wang, J. Zhou, S.-Y. Zhang, *Org. Lett.* **2020**, *22*, 2448-2453.
6. Y. Zhao, D. G. Truhlar, *Theor. Chem. Acc.* **2008**, *120*, 215-241.
7. P. C. Hariharan, J. A. Pople, *Theor. Chim. Acta.* **1973**, *28*, 213-222.
8. K. Fukui, *Acc. Chem. Res.* **1981**, *14*, 363-368.
9. A. V. Marenich, C. J. Cramer, D. G. Truhlar, *J. Phys. Chem. B.* **2009**, *113*, 6378-6396.
10. R. Krishnan, J. S. Binkley, R. Seeger, J. A. Pople, *J. Chem. Phys.* **1980**, *72*, 650-654.
11. A. D. McLean, G. S. Chandler, *J. Chem. Phys.* **1980**, *72*, 5639-5648.
12. M. J. Frisch, G. W. Trucks, H. B. Schlegel, G. E. Scuseria, M. A. Robb, J. R. Cheeseman, G. Scalmani, V. Barone, G. A. Petersson, H. Nakatsuji, X. Li, M. Caricato, A. V. Marenich, J. Bloino, B. G. Janesko, R. Gomperts, B. Mennucci, H. P. Hratchian, J. V. Ortiz, A. F. Izmaylov, J. L. Sonnenberg, D. Williams-Young, F. Ding, F. Lipparini, F. Egidi, J. Goings, B. Peng, A. Petrone, T. Henderson, D. Ranasinghe, V. G. Zakrzewski, J. Gao, N. Rega, G. Zheng, W. Liang, M. Hada, M. Ehara, K. Toyota, R. Fukuda, J. Hasegawa, M. Ishida, T. Nakajima, Y. Honda, O. Kitao, H. Nakai, T. Vreven, K. Throssell, J. A. Montgomery, Jr., J. E. Peralta, F. Ogliaro, M. J. Bearpark, J. J. Heyd, E. N. Brothers, K. N. Kudin, V. N. Staroverov, T. A. Keith, R. Kobayashi, J. Normand, K. Raghavachari, A. P. Rendell, J. C. Burant, S. S. Iyengar, J. Tomasi, M. Cossi, J. M. Millam, M. Klene, C. Adamo, R. Cammi, J. W. Ochterski, R. L. Martin, K. Morokuma, O. Farkas, J. B. Foresman, and D. J. Fox, Gaussian, Inc., Wallingford CT, 2016.



## 7. NMR data

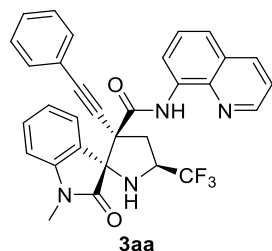

85 mg, 89% yield, white solid.  $[\alpha]_D^{20}$  -130.40 (c 0.5, CHCl<sub>3</sub>, 94% ee)

**HPLC** (Daicel Chiralpak AD-H, hexane/*i*-PrOH = 70:30, 1.0 mL/min, 254 nm): tR (minor) = 7.2 min, tR (major) = 18.3 min.

**<sup>1</sup>H NMR** (400 MHz, CDCl<sub>3</sub>) δ 10.04 (s, 1H), 8.58 (p, *J* = 4.4 Hz, 1H), 8.47 (dd, *J* = 4.3, 1.8 Hz, 1H), 8.04 (dd, *J* = 8.3, 1.8 Hz, 1H), 7.87 (d, *J* = 7.5 Hz, 2H), 7.59 – 7.50 (m, 3H), 7.42 (d, *J* = 4.8 Hz, 2H), 7.39 – 7.30 (m, 6H), 7.16 (t, *J* = 7.6 Hz, 2H), 6.61 (d, *J* = 7.7 Hz, 1H), 4.61 – 4.45 (m, 1H), 3.98 (t, *J* = 11.6 Hz, 1H), 2.92 (s, 3H), 2.76 (dd, *J* = 12.1, 6.0 Hz, 1H), 2.69 (d, *J* = 8.6 Hz, 1H). **<sup>13</sup>C NMR** (101 MHz, CDCl<sub>3</sub>) δ 175.6, 164.2, 147.8, 145.1, 138.1, 135.9, 133.7, 131.7, 130.6, 129.1, 128.5, 127.5, 127.1, 125.8 (q, *J*<sub>CF</sub> = 279.8 Hz), 125.5, 125.1, 122.1, 121.7, 121.6, 121.4, 116.2, 108.4, 89.5, 86.6, 77.3, 77.2, 77.0, 76.7, 71.1, 59.2, 58.3 (q, *J*<sub>CF</sub> = 32.0 Hz), 35.0, 26.1. **<sup>19</sup>F NMR** (376 MHz, CDCl<sub>3</sub>) δ -74.8. **HRMS**: calculated for C<sub>31</sub>H<sub>24</sub>F<sub>3</sub>N<sub>4</sub>O<sub>2</sub><sup>+</sup> [M+H<sup>+</sup>] 541.1846, found 541.1850.

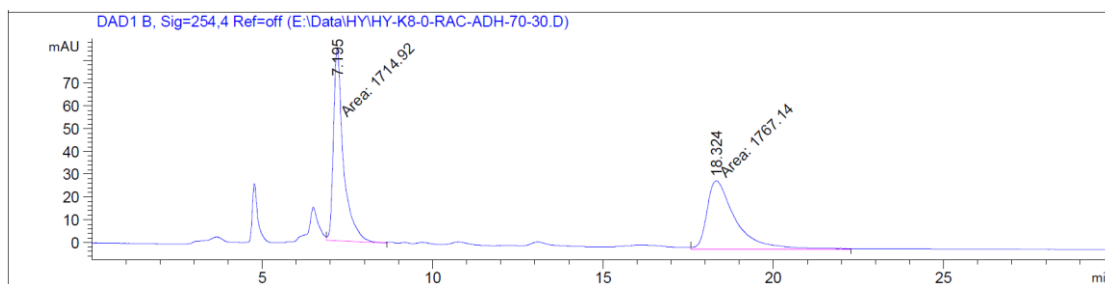

| Peak # | RetTime [min] | Type | Width [min] | Area [mAU*s] | Height [mAU] | Area %  |
|--------|---------------|------|-------------|--------------|--------------|---------|
| 1      | 7.195         | MM   | 0.3380      | 1714.92041   | 84.55321     | 49.2502 |
| 2      | 18.324        | MM   | 0.9772      | 1767.13831   | 30.14035     | 50.7498 |

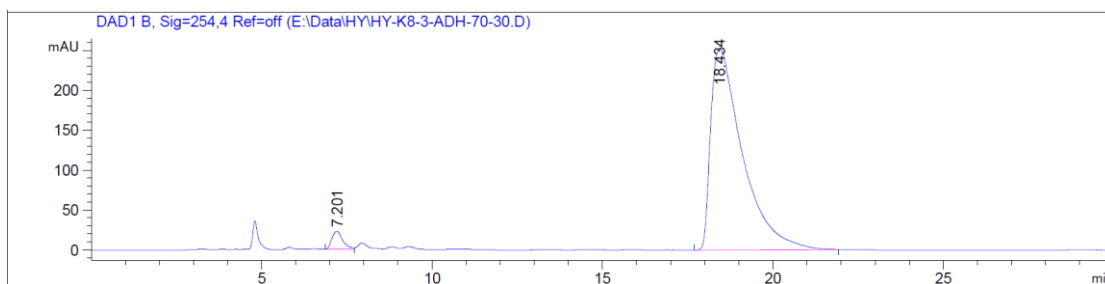

| Peak # | RetTime [min] | Type | Width [min] | Area [mAU*s] | Height [mAU] | Area %  |
|--------|---------------|------|-------------|--------------|--------------|---------|
| 1      | 7.201         | BV   | 0.3460      | 494.57498    | 22.54270     | 2.9457  |
| 2      | 18.434        | BB   | 0.9199      | 1.62950e4    | 252.17310    | 97.0543 |

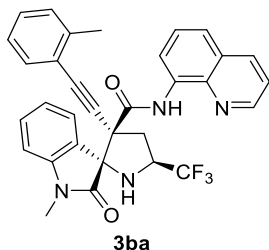

90 mg, 81% yield, white solid.  $[\alpha]_D^{20}$  -73.60 (c 0.5, CHCl<sub>3</sub>, 91% ee)

**HPLC** (Daicel Chiralpak AD-H, hexane/*i*-PrOH = 70:30, 1.0 mL/min, 254 nm): tR (minor) = 12.5 min, tR (major) = 14.1 min.

**<sup>1</sup>H NMR** (400 MHz, CDCl<sub>3</sub>) δ 10.00 (s, 1H), 8.59 (q, *J* = 4.2 Hz, 1H), 8.44 (d, *J* = 4.1 Hz, 1H), 8.07 (d, *J* = 8.2 Hz, 1H), 7.87 (d, *J* = 7.5 Hz, 1H), 7.53 (d, *J* = 7.5 Hz, 1H), 7.48 – 7.42 (m, 2H), 7.38 – 7.32 (m, 2H), 7.29 (d, *J* = 7.7 Hz, 1H), 7.23 – 7.12 (m, 3H), 6.60 (d, *J* = 7.8 Hz, 1H), 4.60 – 4.48 (m, 1H), 3.99 (t, *J* = 11.6 Hz, 1H), 2.92 (s, 3H), 2.77 (dd, *J* = 12.2, 6.0 Hz, 1H), 2.39 (s, 3H).

**<sup>13</sup>C NMR** (101 MHz, CDCl<sub>3</sub>) δ 175.7, 164.4, 147.8, 145.2, 140.6, 138.1, 136.0, 133.8, 132.3, 130.6, 129.7, 129.1, 127.6, 127.2, 125.8 (q, *J*<sub>CF</sub> = 279.5 Hz), 125.7, 125.7, 125.3, 122.2, 121.8, 121.5, 121.4, 116.3, 108.4, 90.2, 88.6, 71.1, 59.5, 58.3 (q, *J*<sub>CF</sub> = 32.3 Hz), 35.4, 26.2, 20.8. **<sup>19</sup>F NMR** (376 MHz, CDCl<sub>3</sub>) δ -74.9. **HRMS**: calculated for C<sub>32</sub>H<sub>25</sub>F<sub>3</sub>N<sub>4</sub>NaO<sub>2</sub><sup>+</sup> [M+H<sup>+</sup>] 577.1822, found 577.1817.

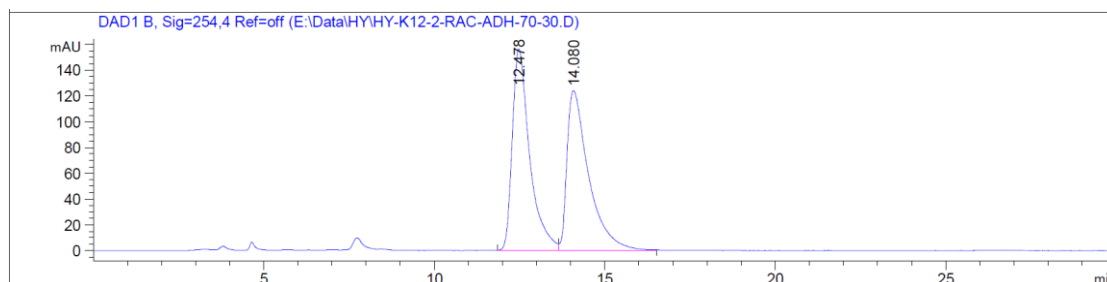

| Peak # | RetTime [min] | Type | Width [min] | Area [mAU*s] | Height [mAU] | Area %  |
|--------|---------------|------|-------------|--------------|--------------|---------|
| 1      | 12.478        | BV   | 0.5270      | 5527.52930   | 156.15616    | 50.4183 |
| 2      | 14.080        | VB   | 0.6383      | 5435.80713   | 123.79910    | 49.5817 |

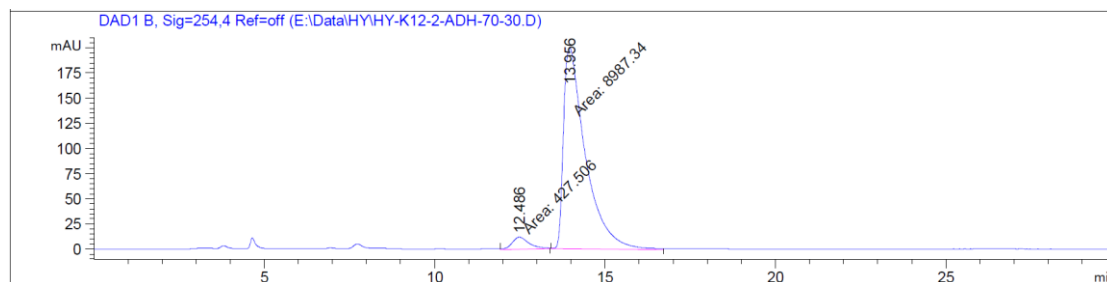

| Peak # | RetTime [min] | Type | Width [min] | Area [mAU*s] | Height [mAU] | Area %  |
|--------|---------------|------|-------------|--------------|--------------|---------|
| 1      | 12.486        | MM   | 0.5865      | 427.50595    | 12.14859     | 4.5408  |
| 2      | 13.956        | MM   | 0.7483      | 8987.34473   | 200.18144    | 95.4592 |

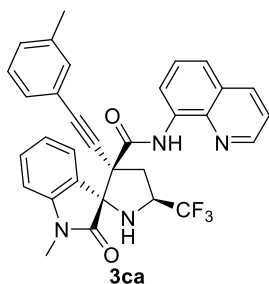

92 mg, 83% yield, white solid.  $[\alpha]_D^{20}$  -165.60 (c 0.5, CHCl<sub>3</sub>, 93% ee)

**HPLC** (Daicel Chiralpak AD-H, hexane/i-PrOH = 70:30, 1.0 mL/min, 254 nm): tR (minor) = 5.6 min, tR (major) = 11.7 min.

**<sup>1</sup>H NMR** (400 MHz, CDCl<sub>3</sub>)  $\delta$  10.04 (s, 1H), 8.62 – 8.54 (m, 1H), 8.48 (dd,  $J$  = 4.2, 1.6 Hz, 1H), 8.04 (dd,  $J$  = 8.3, 1.6 Hz, 1H), 7.88 (d,  $J$  = 7.4 Hz, 1H), 7.44 – 7.39 (d,  $J$  = 4.2 Hz, 2H), 7.39 – 7.31 (m, 4H), 7.28 – 7.22 (m, 1H), 7.21 – 7.13 (m, 2H), 6.60 (d,  $J$  = 7.8 Hz, 1H), 4.65 – 4.43 (m, 1H), 3.97 (t,  $J$  = 11.6 Hz, 1H), 2.92 (s, 3H), 2.81 – 2.62 (m, 2H), 2.34 (s, 3H). **<sup>13</sup>C NMR** (101 MHz, CDCl<sub>3</sub>)  $\delta$  175.6, 164.3, 147.8, 145.1, 138.2, 138.2, 135.9, 133.7, 132.2, 130.6, 130.0, 128.7, 128.3, 127.5, 127.0, 125.7 (q,  $J_{CF}$  = 279.6 Hz), 125.5, 125.1, 122.1, 121.7, 121.4, 121.4, 116.2, 108.3, 89.8, 86.2, 71.1, 59.2, 58.3 (q,  $J_{CF}$  = 32.3 Hz), 35.1, 26.1, 21.1. **<sup>19</sup>F NMR** (376 MHz, CDCl<sub>3</sub>)  $\delta$  -74.8. **HRMS**: calculated for C<sub>32</sub>H<sub>26</sub>F<sub>3</sub>N<sub>4</sub>O<sub>2</sub><sup>+</sup> [M+H<sup>+</sup>] 555.2002, found 555.1999.

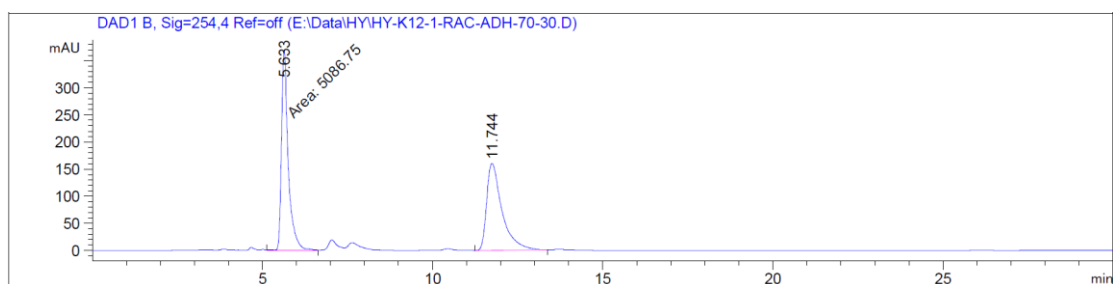

| Peak # | RetTime [min] | Type | Width [min] | Area [mAU*s] | Height [mAU] | Area %  |
|--------|---------------|------|-------------|--------------|--------------|---------|
| 1      | 5.633         | FM   | 0.2295      | 5086.75488   | 369.48526    | 50.4303 |
| 2      | 11.744        | BB   | 0.4625      | 4999.93994   | 160.04979    | 49.5697 |

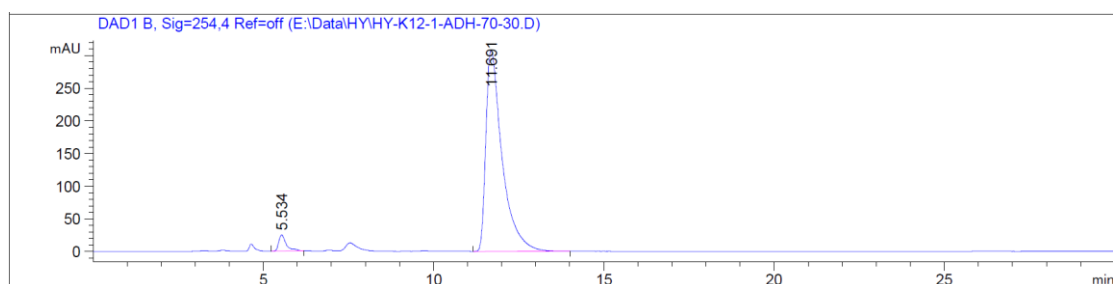

| Peak # | RetTime [min] | Type | Width [min] | Area [mAU*s] | Height [mAU] | Area %  |
|--------|---------------|------|-------------|--------------|--------------|---------|
| 1      | 5.534         | BB   | 0.2270      | 377.96887    | 24.64154     | 3.5750  |
| 2      | 11.691        | BB   | 0.4866      | 1.01945e4    | 307.63757    | 96.4250 |

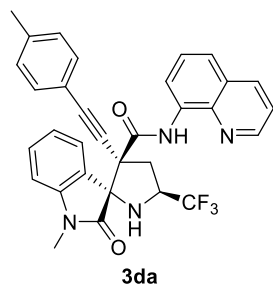

83 mg, 75% yield, white solid.  $[\alpha]_D^{20}$  -125.20 (c 0.5,  $\text{CHCl}_3$ , 91% ee)

**HPLC** (Daicel Chiralpak AD-H, hexane/*i*-PrOH = 70:30, 1.0 mL/min, 254 nm): tR (minor) = 6.5 min, tR (major) = 16.3 min.

**$^1\text{H NMR}$**  (400 MHz,  $\text{CDCl}_3$ )  $\delta$  10.04 (s, 1H), 8.57 (dd,  $J = 5.1, 4.0$  Hz, 1H), 8.46 (dd,  $J = 4.3, 1.7$  Hz, 1H), 8.03 (dd,  $J = 8.3, 1.7$  Hz, 1H), 7.87 (d,  $J = 7.5$  Hz, 1H), 7.44 (d,  $J = 8.2$  Hz, 2H), 7.42 – 7.38 (m, 2H), 7.37 – 7.31 (m, 2H), 7.19 – 7.12 (m, 3H), 6.59 (d,  $J = 7.7$  Hz, 1H), 4.62 – 4.15 (m, 1H), 3.97 (t,  $J = 11.6$  Hz, 1H), 2.91 (s, 3H), 2.81 – 2.64 (m, 2H), 2.35 (s, 3H).  **$^{13}\text{C NMR}$**  (101 MHz,  $\text{CDCl}_3$ )  $\delta$  175.6, 164.3, 147.8, 145.0, 139.3, 138.1, 135.9, 133.7, 131.5, 130.5, 129.2, 127.5, 127.0, 125.8 (q,  $J_{\text{CF}} = 279.5$  Hz), 125.5, 125.1, 122.1, 121.7, 121.4, 118.5, 116.2, 108.3, 89.8, 85.9, 71.1, 59.3, 58.3 (q,  $J_{\text{CF}} = 32.2$  Hz), 35.0, 26.0, 21.4.  **$^{19}\text{F NMR}$**  (376 MHz,  $\text{CDCl}_3$ )  $\delta$  -74.8. **HRMS**: calculated for  $\text{C}_{32}\text{H}_{26}\text{F}_3\text{N}_4\text{O}_2^+$   $[\text{M}+\text{H}^+]$  555.2002, found 555.2009.

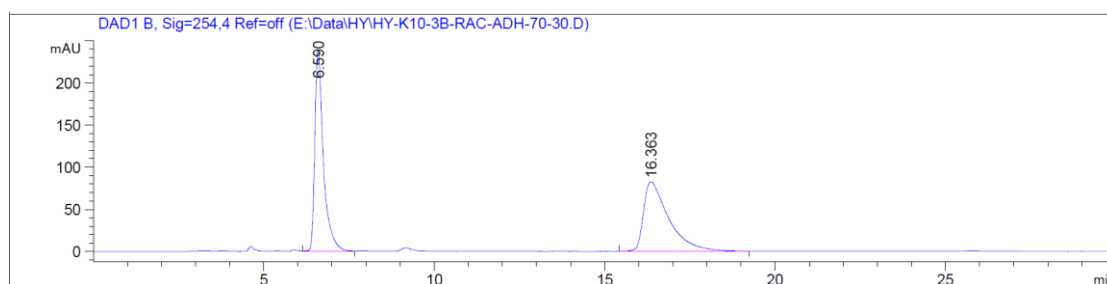

| Peak # | RetTime [min] | Type | Width [min] | Area [mAU*s] | Height [mAU] | Area %  |
|--------|---------------|------|-------------|--------------|--------------|---------|
| 1      | 6.590         | BB   | 0.2580      | 4158.33545   | 237.85574    | 49.5255 |
| 2      | 16.363        | BB   | 0.7342      | 4238.02490   | 82.38226     | 50.4745 |

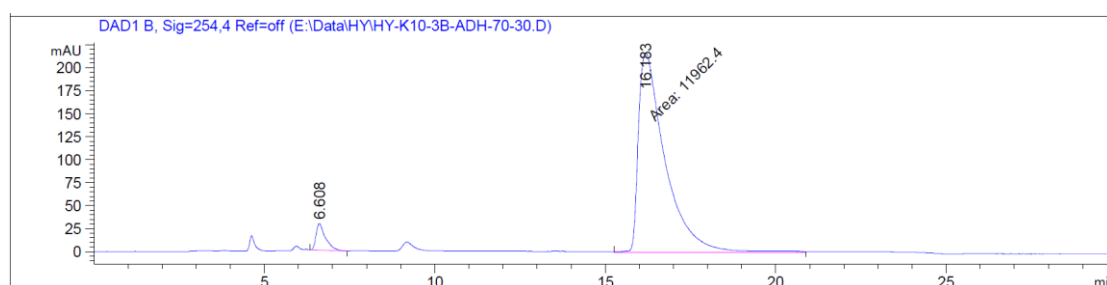

| Peak # | RetTime [min] | Type | Width [min] | Area [mAU*s] | Height [mAU] | Area %  |
|--------|---------------|------|-------------|--------------|--------------|---------|
| 1      | 6.608         | BB   | 0.2729      | 553.19788    | 28.96019     | 4.4201  |
| 2      | 16.183        | MM   | 0.9157      | 1.19624e4    | 217.72339    | 95.5799 |

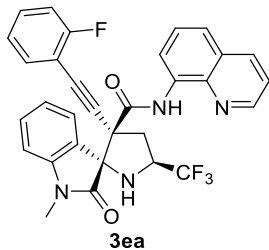

83 mg, 74% yield, brown solid.  $[\alpha]_D^{20}$  -130.00 (c 0.5, CHCl<sub>3</sub>, 91% ee)

**HPLC** (Daicel Chiralpak AD-H, hexane/*i*-PrOH = 70:30, 1.0 mL/min, 254 nm): tR (minor) = 6.3 min, tR (major) = 11.1 min.

**<sup>1</sup>H NMR** (400 MHz, CDCl<sub>3</sub>) δ 10.00 (s, 1H), 8.58 (p, *J* = 4.4 Hz, 1H), 8.46 (dd, *J* = 4.2, 1.6 Hz, 1H), 8.04 (dd, *J* = 8.3, 1.6 Hz, 1H), 7.96 (d, *J* = 7.4 Hz, 1H), 7.50 (td, *J* = 7.5, 1.6 Hz, 2H), 7.42 (d, *J* = 4.5 Hz, 2H), 7.40 – 7.32 (m, 4H), 7.20 – 7.09 (m, 4H), 6.63 (d, *J* = 7.8 Hz, 1H), 4.61 – 4.49 (m, 2H), 4.01 (t, *J* = 11.6 Hz, 1H), 2.93 (s, 3H), 2.80 (dd, *J* = 12.2, 6.0 Hz, 1H), 2.32 – 2.75 (m, 1H).

**<sup>13</sup>C NMR** (101 MHz, CDCl<sub>3</sub>) δ 175.6, 164.1, 164.0, 161.6, 147.9, 145.1, 138.1, 135.9, 133.7, 133.6, 130.9, 130.9, 130.6, 127.5, 127.0, 125.8 (q, *J*<sub>CF</sub> = 279.6 Hz), 125.3, 125.2, 125.2, 124.1, 124.1, 122.4, 121.8, 121.7, 121.5, 116.3, 115.7, 115.5, 110.3, 110.2, 108.3, 91.6, 91.6, 83.0, 59.4, 58.1 (q, *J*<sub>CF</sub> = 32.3 Hz), 35.4, 26.1. **<sup>19</sup>F NMR** (376 MHz, CDCl<sub>3</sub>) δ -74.9, -109.3. **HRMS**: calculated for C<sub>31</sub>H<sub>23</sub>F<sub>4</sub>N<sub>4</sub>O<sub>2</sub><sup>+</sup> [M+H<sup>+</sup>] 559.1752, found 559.1756.

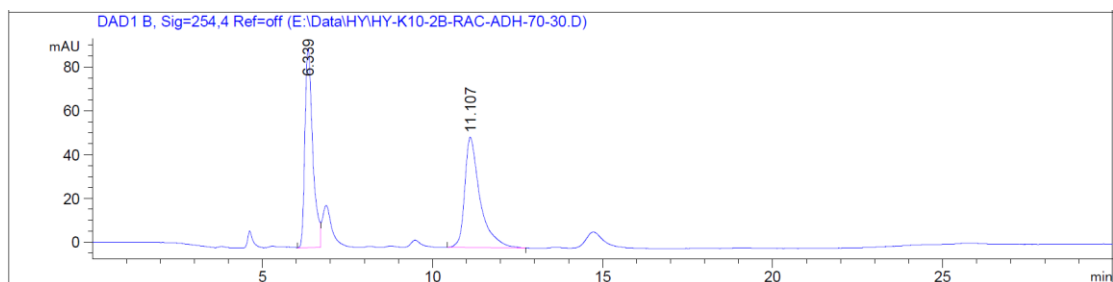

| Peak # | RetTime [min] | Type | Width [min] | Area [mAU*s] | Height [mAU] | Area %  |
|--------|---------------|------|-------------|--------------|--------------|---------|
| 1      | 6.339         | BV   | 0.2384      | 1455.15784   | 91.06264     | 48.0023 |
| 2      | 11.107        | BB   | 0.4531      | 1576.27332   | 50.36798     | 51.9977 |

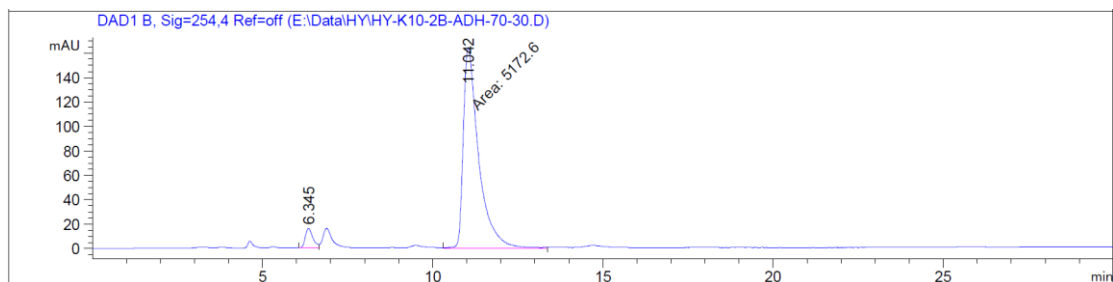

| Peak # | RetTime [min] | Type | Width [min] | Area [mAU*s] | Height [mAU] | Area %  |
|--------|---------------|------|-------------|--------------|--------------|---------|
| 1      | 6.345         | BV   | 0.2349      | 246.29396    | 15.88579     | 4.5451  |
| 2      | 11.042        | MM   | 0.5242      | 5172.60498   | 164.45439    | 95.4549 |

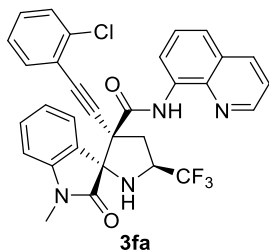

88 mg, 77% yield, yellow solid.  $[\alpha]_D^{20}$  -101.60 (c 0.5,  $\text{CHCl}_3$ , 90% ee)

**HPLC** (Daicel Chiralpak AD-H, hexane/*i*-PrOH = 70:30, 1.0 mL/min, 254 nm): tR (minor) = 9.5 min, tR (major) = 12.7 min.

**$^1\text{H}$  NMR** (400 MHz,  $\text{CDCl}_3$ )  $\delta$  10.02 (s, 1H), 8.60 (p,  $J = 4.4$  Hz, 1H), 8.48 (dd,  $J = 4.3, 1.7$  Hz, 1H), 8.07 (dd,  $J = 8.3, 1.7$  Hz, 1H), 7.94 (dd,  $J = 7.6, 1.3$  Hz, 1H), 7.55 (dd,  $J = 7.6, 1.8$  Hz, 1H), 7.49 – 7.41 (m, 3H), 7.39 – 7.29 (m, 3H), 7.27 – 7.22 (m, 1H), 7.14 (t,  $J = 7.5$  Hz, 1H), 6.63 (d,  $J = 7.6$  Hz, 1H), 4.71 – 4.51 (m, 1H), 4.02 (t,  $J = 11.6$  Hz, 1H), 2.95 (s, 3H), 2.81 (dd,  $J = 12.1, 6.1$  Hz, 1H), 2.71 (d,  $J = 7.8$  Hz, 1H).  **$^{13}\text{C}$  NMR** (101 MHz,  $\text{CDCl}_3$ )  $\delta$  175.7, 164.1, 148.0, 145.2, 138.3, 136.3, 136.1, 133.8, 133.6, 130.7, 130.2, 129.5, 127.7, 127.2, 126.7, 125.9 (q,  $J_{\text{CF}} = 279.8$  Hz), 125.5, 125.4, 122.4, 121.9, 121.7, 121.6, 116.5, 108.4, 91.7, 86.4, 70.9, 59.6, 58.3 (q,  $J_{\text{CF}} = 32.8$  Hz), 35.5, 26.2.  **$^{19}\text{F}$  NMR** (376 MHz,  $\text{CDCl}_3$ )  $\delta$  -74.9. **HRMS**: calculated for  $\text{C}_{31}\text{H}_{23}\text{ClF}_3\text{N}_4\text{O}_2^+$   $[\text{M}+\text{H}^+]$  575.1456, found 575.1465.

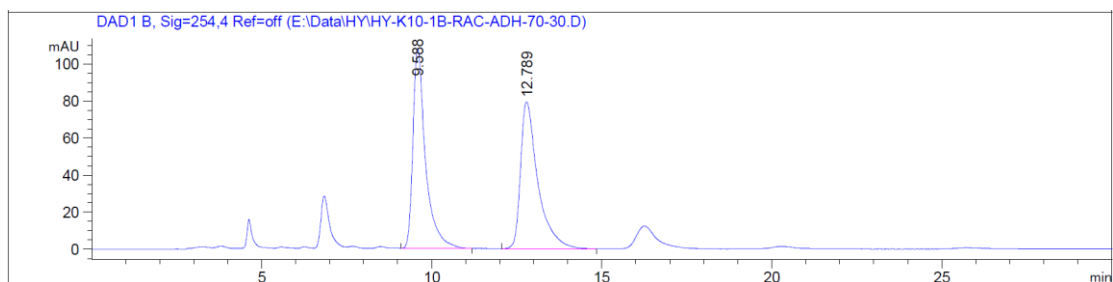

| Peak # | RetTime [min] | Type | Width [min] | Area [mAU*s] | Height [mAU] | Area %  |
|--------|---------------|------|-------------|--------------|--------------|---------|
| 1      | 9.588         | BB   | 0.3778      | 2773.75000   | 107.93480    | 49.6533 |
| 2      | 12.789        | BB   | 0.5190      | 2812.48853   | 79.45441     | 50.3467 |

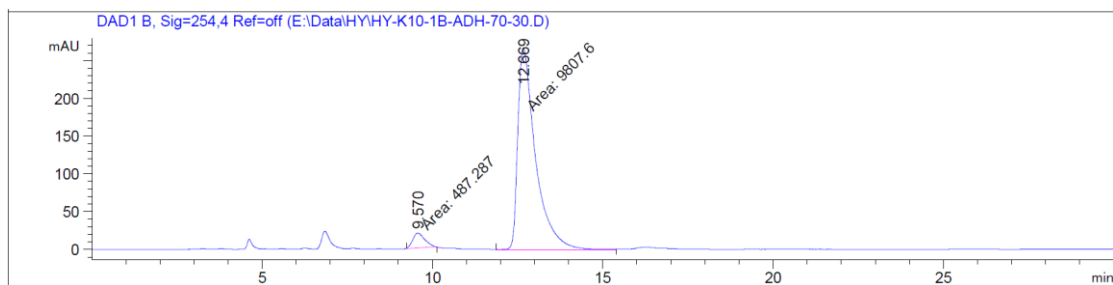

| Peak # | RetTime [min] | Type | Width [min] | Area [mAU*s] | Height [mAU] | Area %  |
|--------|---------------|------|-------------|--------------|--------------|---------|
| 1      | 9.570         | MM   | 0.4102      | 487.28708    | 19.80113     | 4.7333  |
| 2      | 12.669        | MM   | 0.6111      | 9807.60352   | 267.46814    | 95.2667 |

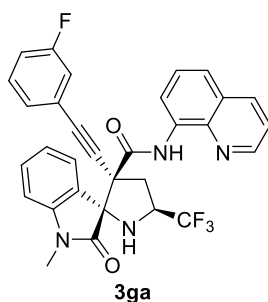

82 mg, 73% yield, yellow solid.  $[\alpha]_D^{20}$  -107.20 (c 0.5, CHCl<sub>3</sub>, 96% ee)

**HPLC** (Daicel Chiralpak AD-H, hexane/*i*-PrOH = 70:30, 1.0 mL/min, 254 nm): tR (minor) = 6.2 min, tR (major) = 13.2 min.

**<sup>1</sup>H NMR** (400 MHz, CDCl<sub>3</sub>) δ 10.01 (s, 1H), 8.58 (p, *J* = 4.5 Hz, 1H), 8.50 (dd, *J* = 4.2, 1.6 Hz, 1H), 8.06 (dd, *J* = 8.3, 1.5 Hz, 1H), 7.83 (d, *J* = 7.5 Hz, 1H), 7.46 – 7.41 (m, 2H), 7.39 – 7.31 (m, 4H), 7.30 – 7.26 (m, 1H), 7.17 (t, *J* = 7.6 Hz, 1H), 7.12 – 7.06 (m, 1H), 6.62 (d, *J* = 7.8 Hz, 1H), 4.59 – 4.46 (m, 1H), 3.97 (t, *J* = 11.6 Hz, 1H), 2.92 (s, 3H), 2.82 – 2.58 (m, 2H). **<sup>13</sup>C NMR** (101 MHz, CDCl<sub>3</sub>) δ 175.5, 163.9, 163.5, 161.0, 147.9, 145.1, 138.1, 136.0, 133.6, 130.7, 130.2, 130.1, 127.6, 127.5, 127.5, 127.1, 125.7 (q, *J*<sub>CF</sub> = 279.7 Hz), 125.5, 125.0, 123.4, 123.3, 122.1, 121.9, 121.5, 118.7, 118.5, 116.6, 116.4, 116.3, 108.4, 88.4, 88.3, 87.7, 71.2, 59.2, 58.3 (q, *J*<sub>CF</sub> = 32.4 Hz), 34.9, 26.1. **<sup>19</sup>F NMR** (376 MHz, CDCl<sub>3</sub>) δ -74.9, -112.2. **HRMS**: calculated for C<sub>31</sub>H<sub>22</sub>F<sub>4</sub>N<sub>4</sub>NaO<sub>2</sub><sup>+</sup> [M+Na<sup>+</sup>] 581.1571, found 581.1564.

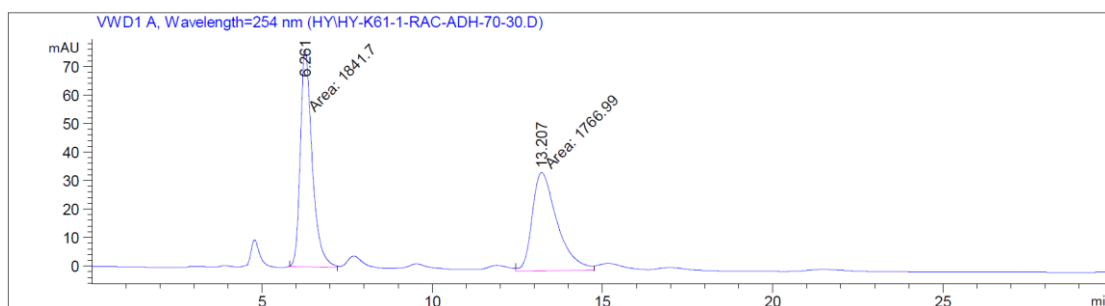

| Peak # | RetTime [min] | Type | Width [min] | Area [mAU*s] | Height [mAU] | Area %  |
|--------|---------------|------|-------------|--------------|--------------|---------|
| 1      | 6.261         | MM   | 0.4035      | 1841.69800   | 76.07048     | 51.0351 |
| 2      | 13.207        | MM   | 0.8522      | 1766.99231   | 34.55627     | 48.9649 |

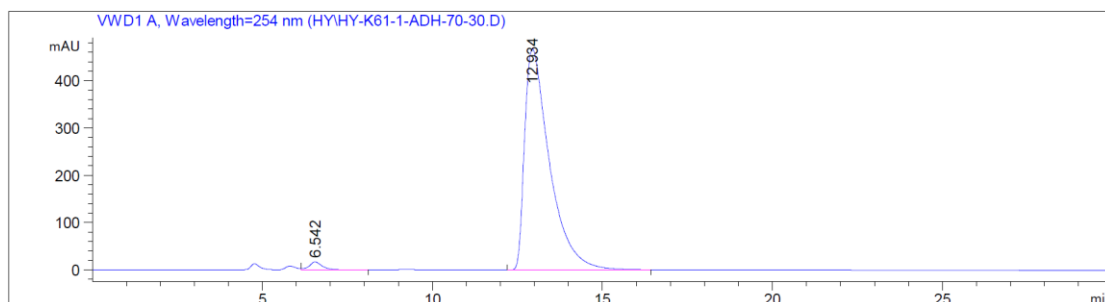

| Peak # | RetTime [min] | Type | Width [min] | Area [mAU*s] | Height [mAU] | Area %  |
|--------|---------------|------|-------------|--------------|--------------|---------|
| 1      | 6.542         | VB   | 0.3930      | 450.35464    | 16.68103     | 1.8535  |
| 2      | 12.934        | BB   | 0.7584      | 2.38478e4    | 468.09219    | 98.1465 |

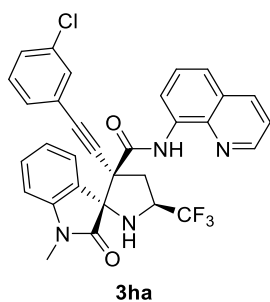

90 mg, 78% yield, white solid.  $[\alpha]_D^{20}$  -108.40 (c 0.5, CHCl<sub>3</sub>, 95% ee)

**HPLC** (Daicel Chiralpak AD-H, hexane/*i*-PrOH = 70:30, 1.0 mL/min, 254 nm): tR (minor) = 5.8 min, tR (major) = 13.1 min.

**<sup>1</sup>H NMR** (400 MHz, CDCl<sub>3</sub>) δ 10.02 (s, 1H), 8.61 – 8.54 (m, 1H), 8.52 (dd, *J* = 4.2, 1.6 Hz, 1H), 8.06 (dd, *J* = 8.3, 1.6 Hz, 1H), 7.81 (d, *J* = 7.3 Hz, 1H), 7.59 – 7.55 (m, 1H), 7.45 – 7.39 (m, 3H), 7.38 – 7.27 (m, 4H), 7.17 (t, *J* = 7.6 Hz, 1H), 6.61 (d, *J* = 7.8 Hz, 1H), 4.62 – 4.44 (m, 1H), 3.97 (t, *J* = 11.6 Hz, 1H), 2.92 (s, 3H), 2.80 – 2.64 (m, 2H). **<sup>13</sup>C NMR** (101 MHz, CDCl<sub>3</sub>) δ 175.5, 163.8, 147.9, 145.0, 138.1, 136.0, 134.2, 133.6, 131.6, 130.7, 129.8, 129.7, 129.4, 127.6, 127.0, 125.7 (q, *J*<sub>CF</sub> = 279.5 Hz), 125.4, 124.9, 123.2, 122.1, 121.8, 121.5, 116.2, 108.4, 88.2, 88.0, 71.2, 59.2, 58.3 (q, *J*<sub>CF</sub> = 32.4 Hz), 34.8, 26.1. **<sup>19</sup>F NMR** (376 MHz, CDCl<sub>3</sub>) δ -74.8. **HRMS**: calculated for C<sub>31</sub>H<sub>23</sub>ClF<sub>3</sub>N<sub>4</sub>O<sub>2</sub><sup>+</sup> [M+H<sup>+</sup>] 575.1456, found 575.1459.

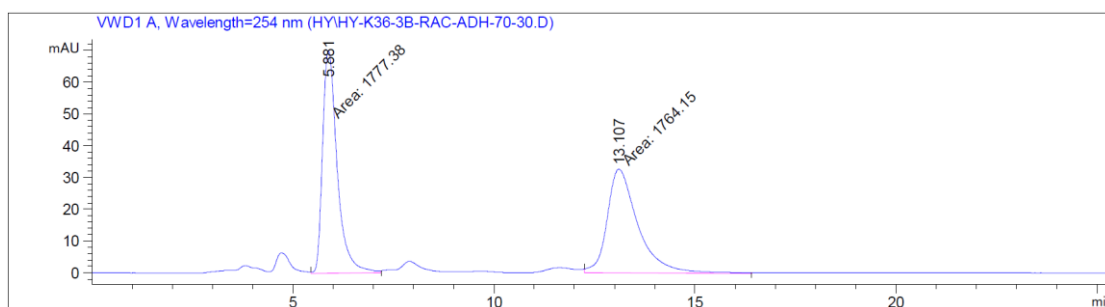

| Peak # | RetTime [min] | Type | Width [min] | Area [mAU*s] | Height [mAU] | Area %  |
|--------|---------------|------|-------------|--------------|--------------|---------|
| 1      | 5.881         | MM   | 0.4214      | 1777.38330   | 70.29691     | 50.1869 |
| 2      | 13.107        | MM   | 0.8982      | 1764.14795   | 32.73529     | 49.8131 |

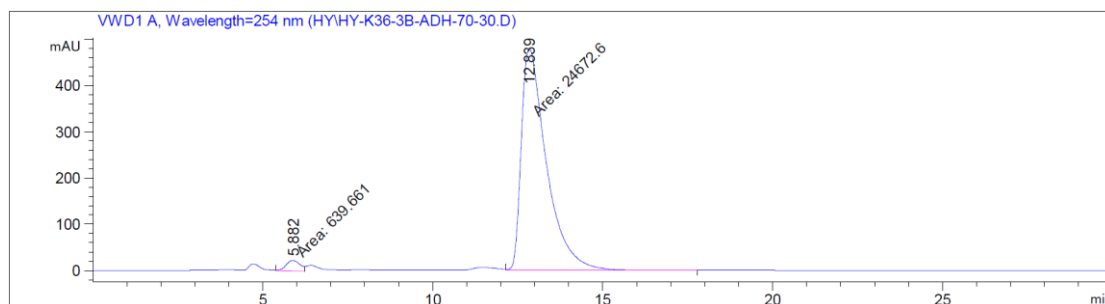

| Peak # | RetTime [min] | Type | Width [min] | Area [mAU*s] | Height [mAU] | Area %  |
|--------|---------------|------|-------------|--------------|--------------|---------|
| 1      | 5.882         | MM   | 0.4743      | 639.66138    | 22.47787     | 2.5271  |
| 2      | 12.839        | FM   | 0.8582      | 2.46726e4    | 479.16650    | 97.4729 |



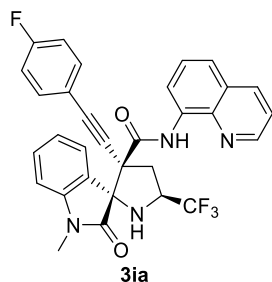

102 mg, 91% yield, white soild.  $[\alpha]_D^{20}$  -113.60 (c 0.5, CHCl<sub>3</sub>, 92% ee)

**HPLC** (Daicel Chiralpak AD-H, hexane/*i*-PrOH = 70:30, 1.0 mL/min, 254 nm): tR (minor) = 7.2 min, tR (major) = 21.2 min.

**<sup>1</sup>H NMR** (400 MHz, CDCl<sub>3</sub>)  $\delta$  10.01 (s, 1H), 8.62 – 8.54 (m, 1H), 8.47 (dd,  $J$  = 4.2, 1.5 Hz, 1H), 8.06 (dd,  $J$  = 8.3, 1.5 Hz, 1H), 7.85 (d,  $J$  = 7.4 Hz, 1H), 7.57 – 7.50 (m, 2H), 7.42 (d,  $J$  = 4.3 Hz, 2H), 7.39 – 7.32 (m, 2H), 7.17 (t,  $J$  = 7.6 Hz, 1H), 7.10 – 7.02 (m,  $J$  = 8.6 Hz, 2H), 6.62 (d,  $J$  = 7.8 Hz, 1H), 4.62 – 4.44 (m, 1H), 3.97 (t,  $J$  = 11.6 Hz, 1H), 2.92 (s, 3H), 2.81 – 2.62 (m, 2H). **<sup>13</sup>C NMR** (101 MHz, CDCl<sub>3</sub>)  $\delta$  175.6, 164.2, 164.1, 161.6, 147.8, 145.1, 138.1, 136.0, 133.7, 133.6, 133.6, 130.6, 127.6, 127.1, 125.8 (q,  $J_{CF}$  = 279.6 Hz), 125.5, 125.0, 122.1, 121.8, 121.5, 117.7, 117.7, 116.2, 115.9, 115.7, 108.4, 88.5, 86.4, 86.4, 71.1, 59.2, 58.2 (q,  $J_{CF}$  = 32.3 Hz), 35.0, 26.0. **<sup>19</sup>F NMR** (376 MHz, CDCl<sub>3</sub>)  $\delta$  -74.8, -109.2. **HRMS**: calculated for C<sub>31</sub>H<sub>23</sub>F<sub>4</sub>N<sub>4</sub>O<sub>2</sub><sup>+</sup> [M+H<sup>+</sup>] 559.1752, found 559.1754.

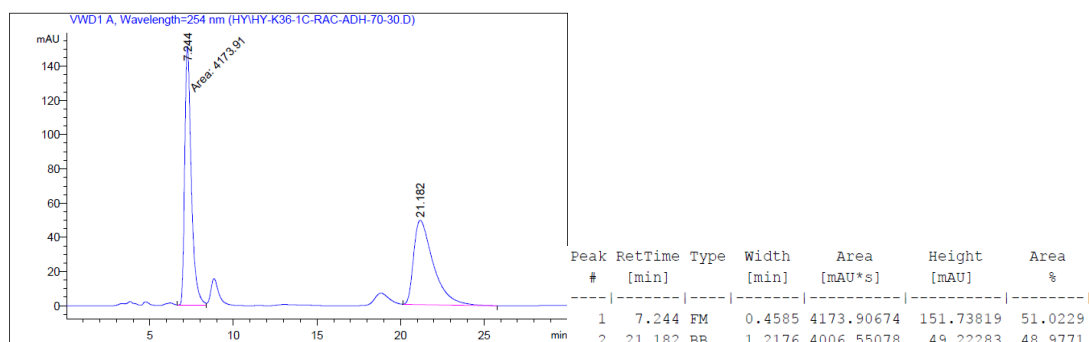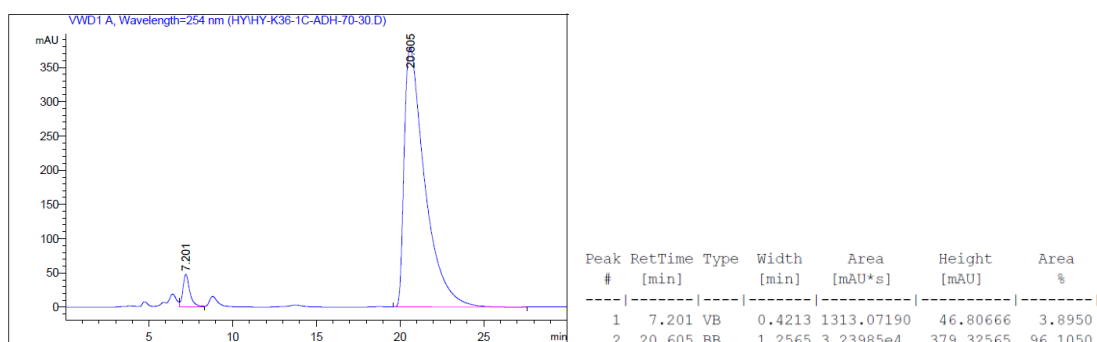

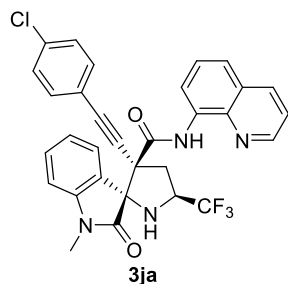

79 mg, 69% yield, yellow solid.  $[\alpha]_D^{20}$  -153.60 (c 0.5, CHCl<sub>3</sub>, 92% ee)

**HPLC** (Daicel Chiralpak AD-H, hexane/*i*-PrOH = 70:30, 1.0 mL/min, 254 nm): tR (minor) = 7.3 min, tR (major) = 19.3 min.

**<sup>1</sup>H NMR** (400 MHz, CDCl<sub>3</sub>) δ 10.01 (s, 1H), 8.58 (p, *J* = 4.4 Hz, 1H), 8.48 (dd, *J* = 4.2, 1.5 Hz, 1H), 8.07 (dd, *J* = 8.3, 1.5 Hz, 1H), 7.82 (d, *J* = 7.5 Hz, 1H), 7.50 – 7.43 (m, 4H), 7.40 – 7.32 (m, 4H), 7.15 (t, *J* = 7.6 Hz, 1H), 6.63 (d, *J* = 7.8 Hz, 1H), 4.59 – 4.44 (m, 1H), 3.96 (t, *J* = 11.6 Hz, 1H), 2.93 (s, 3H), 2.80 – 2.61 (m, 2H). **<sup>13</sup>C NMR** (101 MHz, CDCl<sub>3</sub>) δ 175.6, 164.1, 147.9, 145.2, 138.2, 136.1, 135.2, 133.7, 132.9, 130.7, 128.9, 127.6, 127.2, 125.7 (q, *J*<sub>CF</sub> = 279.6 Hz), 125.6, 125.0, 122.1, 121.8, 121.5, 120.1, 116.3, 108.5, 88.4, 87.7, 71.1, 59.2, 58.3 (q, *J*<sub>CF</sub> = 32.3 Hz), 35.0, 26.1. **<sup>19</sup>F NMR** (376 MHz, CDCl<sub>3</sub>) δ -74.9. **HRMS**: calculated for C<sub>31</sub>H<sub>23</sub>ClF<sub>3</sub>N<sub>4</sub>O<sub>2</sub><sup>+</sup> [M+H<sup>+</sup>] 575.1456, found 575.1462.

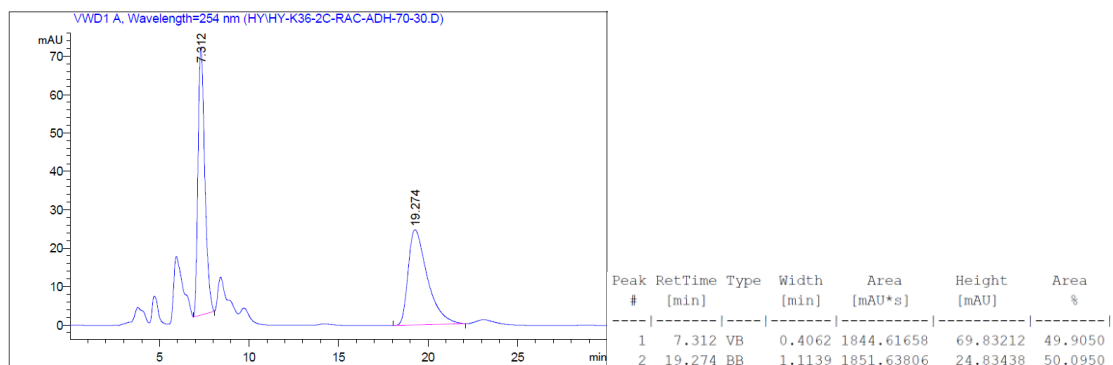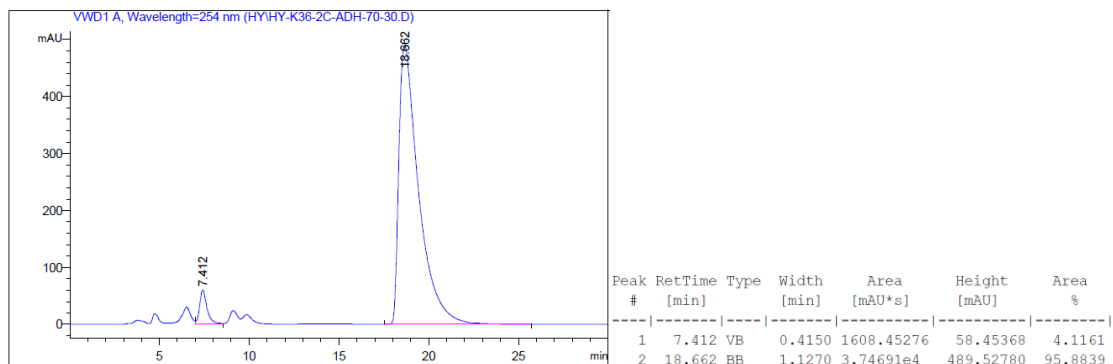

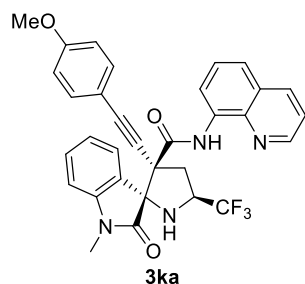

97 mg, 85% yield, white solid.  $[\alpha]_D^{20}$  -182.40 (c 0.5, CHCl<sub>3</sub>, 93% ee)

**HPLC** (Daicel Chiralpak AD-H, hexane/*i*-PrOH = 70:30, 1.0 mL/min, 254 nm): tR (minor) = 8.1 min, tR (major) = 34.7 min.

**<sup>1</sup>H NMR** (400 MHz, CDCl<sub>3</sub>)  $\delta$  10.03 (s, 1H), 8.62 – 8.53 (m, 1H), 8.46 (dd, *J* = 4.2, 1.6 Hz, 1H), 8.03 (dd, *J* = 8.3, 1.6 Hz, 1H), 7.89 – 7.84 (m, 2H), 7.52 – 7.44 (m, 2H), 7.43 – 7.38 (m, 2H), 7.36 – 7.30 (m, 2H), 7.19 – 7.12 (m, 1H), 6.92 – 6.84 (m, 2H), 6.59 (d, *J* = 7.7 Hz, 1H), 4.62 – 4.44 (m, 1H), 3.96 (t, *J* = 11.6 Hz, 1H), 3.80 (s, 3H), 2.90 (s, 3H), 2.80 – 2.65 (m, 2H). **<sup>13</sup>C NMR** (101 MHz, CDCl<sub>3</sub>)  $\delta$  175.7, 164.4, 160.1, 147.8, 145.0, 138.1, 135.9, 133.7, 133.1, 130.5, 127.5, 127.0, 125.8 (q, *J*<sub>CF</sub> = 279.6 Hz), 125.5, 125.1, 122.1, 121.7, 121.4, 116.1, 114.0, 113.5, 108.3, 89.6, 85.1, 71.1, 59.2, 58.2 (q, *J*<sub>CF</sub> = 32.3 Hz), 55.2, 35.0, 26.0. **<sup>19</sup>F NMR** (376 MHz, CDCl<sub>3</sub>)  $\delta$  -74.7. **HRMS**: calculated for C<sub>31</sub>H<sub>23</sub>F<sub>4</sub>N<sub>4</sub>O<sub>2</sub><sup>+</sup> [M+H<sup>+</sup>] 571.1952, found 571.1961.

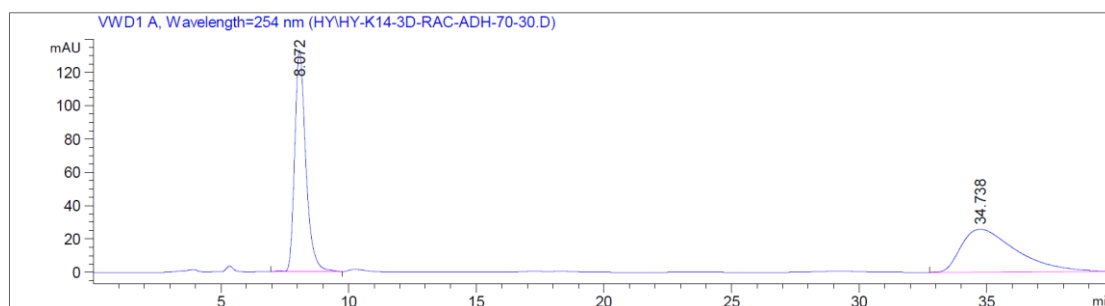

| Peak # | RetTime [min] | Type | Width [min] | Area [mAU*s] | Height [mAU] | Area %  |
|--------|---------------|------|-------------|--------------|--------------|---------|
| 1      | 8.072         | VB R | 0.4556      | 4006.42407   | 132.95314    | 50.8633 |
| 2      | 34.738        | BBA  | 2.2654      | 3870.41797   | 25.81208     | 49.1367 |

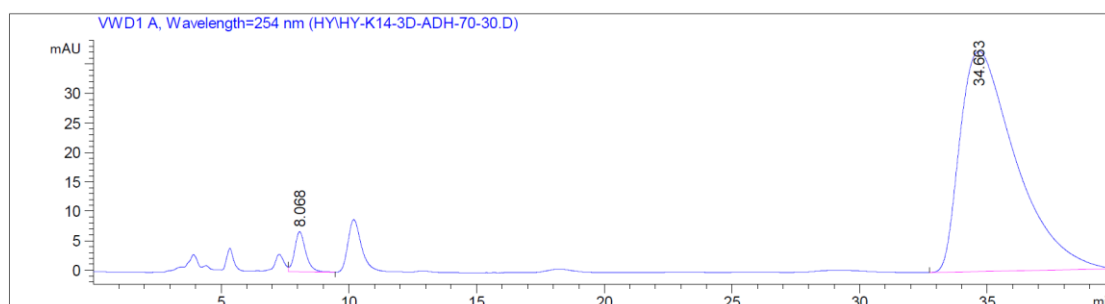

| Peak # | RetTime [min] | Type | Width [min] | Area [mAU*s] | Height [mAU] | Area %  |
|--------|---------------|------|-------------|--------------|--------------|---------|
| 1      | 8.068         | VB   | 0.4463      | 200.76123    | 6.76389      | 3.4145  |
| 2      | 34.663        | BBA  | 2.2805      | 5678.88232   | 37.42001     | 96.5855 |

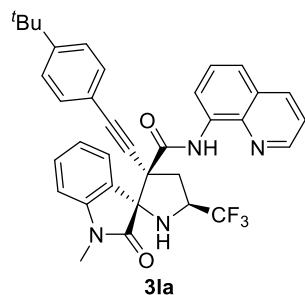

87 mg, 73% yield, yellow solid.  $[\alpha]_D^{20}$  -118.00 (c 0.5, CHCl<sub>3</sub>, 94% ee)

**HPLC** (Daicel Chiralpak AD-H, hexane/*i*-PrOH = 90:10, 1.0 mL/min, 254 nm): tR (minor) = 29.6 min, tR (major) = 36.0 min.

**<sup>1</sup>H NMR** (400 MHz, CDCl<sub>3</sub>)  $\delta$  10.03 (s, 1H), 8.62 – 8.54 m, 1H), 8.48 (dd,  $J$  = 4.2, 1.6 Hz, 1H), 8.04 (dd,  $J$  = 8.3, 1.6 Hz, 1H), 7.90 (d,  $J$  = 7.5 Hz, 1H), 7.52 – 7.47 (m, 2H), 7.41 (dd,  $J$  = 5.9, 1.9 Hz, 3H), 7.39 – 7.31 (m, 3H), 7.18 (t,  $J$  = 7.6 Hz, 1H), 6.60 (d,  $J$  = 7.8 Hz, 1H), 4.61 – 4.44 (m, 1H), 3.97 (t,  $J$  = 11.6 Hz, 1H), 2.92 (s, 3H), 2.81 – 2.61 (m, 2H), 1.32 (s, 9H). **<sup>13</sup>C NMR** (101 MHz, CDCl<sub>3</sub>)  $\delta$  175.7, 164.4, 152.5, 147.8, 145.1, 138.2, 135.9, 133.7, 131.4, 130.5, 127.5, 127.0, 125.8 (q,  $J_{CF}$  = 279.6 Hz), 125.6, 125.5, 125.2, 122.2, 121.7, 121.4, 118.6, 116.2, 108.3, 89.7, 85.9, 71.1, 59.3, 58.3 (q,  $J_{CF}$  = 32.3 Hz), 35.1, 34.8, 31.0, 26.1. **<sup>19</sup>F NMR** (376 MHz, CDCl<sub>3</sub>)  $\delta$  -74.8. **HRMS**: calculated for C<sub>32</sub>H<sub>26</sub>F<sub>3</sub>N<sub>4</sub>O<sub>2</sub><sup>+</sup> [M+H<sup>+</sup>] 597.2472, found 597.2479.

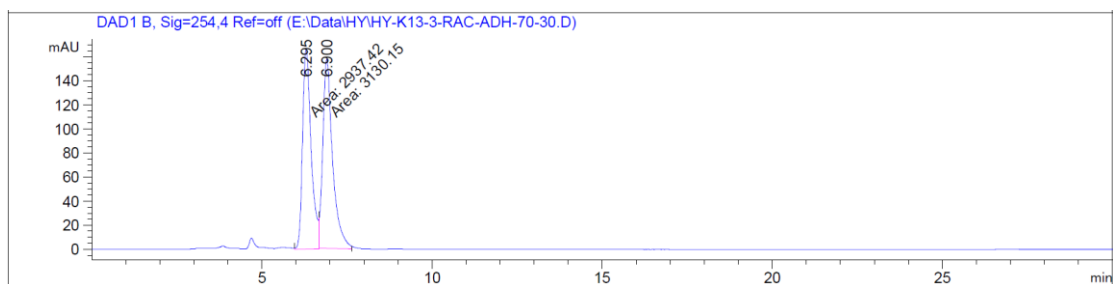

| Peak # | RetTime [min] | Type | Width [min] | Area [mAU*s] | Height [mAU] | Area %  |
|--------|---------------|------|-------------|--------------|--------------|---------|
| 1      | 6.295         | MM   | 0.2945      | 2937.42163   | 166.22252    | 48.4118 |
| 2      | 6.900         | FM   | 0.3315      | 3130.15161   | 157.37370    | 51.5882 |

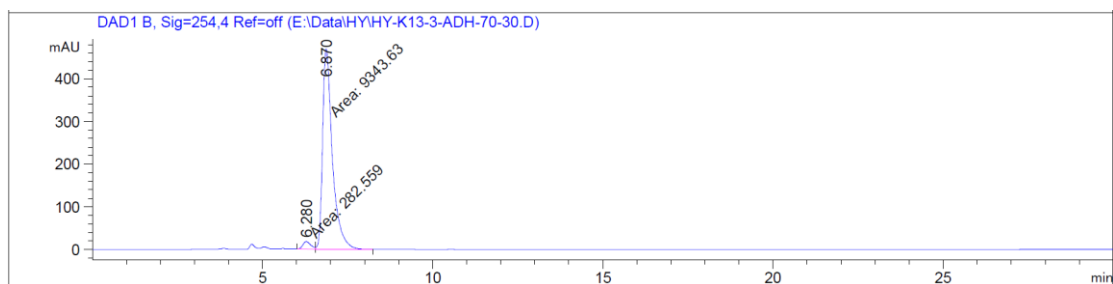

| Peak # | RetTime [min] | Type | Width [min] | Area [mAU*s] | Height [mAU] | Area %  |
|--------|---------------|------|-------------|--------------|--------------|---------|
| 1      | 6.280         | MF   | 0.2682      | 282.55850    | 17.55734     | 2.9353  |
| 2      | 6.870         | FM   | 0.3320      | 9343.62891   | 469.01605    | 97.0647 |

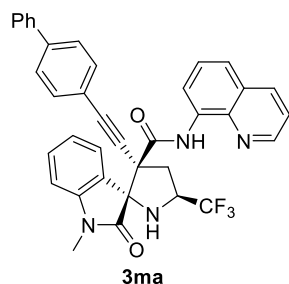

113 mg, 92% yield, yellow solid.  $[\alpha]_{20}^D$  -196.40 (c 0.5,  $\text{CHCl}_3$ , 91% ee)

**HPLC** (Daicel Chiralpak AD-H, hexane/*i*-PrOH = 80:20, 1.0 mL/min, 254 nm): tR (minor) = 14.8 min, tR (major) = 34.2 min.

**$^1\text{H NMR}$**  (400 MHz,  $\text{CDCl}_3$ )  $\delta$  10.06 (s, 1H), 8.64 – 8.55 (m, 1H), 8.50 (dd,  $J = 4.2, 1.6$  Hz, 1H), 8.05 (dd,  $J = 8.3, 1.6$  Hz, 1H), 7.90 (d,  $J = 7.4$  Hz, 1H), 7.64 – 7.55 (m, 6H), 7.47 – 7.40 (m, 4H), 7.39 – 7.32 (m, 3H), 7.18 (t,  $J = 7.6$  Hz, 1H), 6.61 (d,  $J = 7.8$  Hz, 1H), 4.65 – 4.47 (m, 1H), 3.99 (t,  $J = 11.6$  Hz, 1H), 2.93 (s, 3H), 2.85 – 2.50 (m, 2H).  **$^{13}\text{C NMR}$**  (101 MHz,  $\text{CDCl}_3$ )  $\delta$  175.7, 164.3, 147.9, 145.1, 141.8, 139.9, 138.2, 136.0, 133.7, 132.1, 130.6, 128.8, 127.8, 127.6, 127.1, 126.9, 125.8 (q,  $J_{\text{CF}} = 279.5$  Hz), 125.6, 125.1, 122.2, 121.8, 121.5, 120.4, 116.3, 108.4, 89.5, 87.3, 71.2, 59.3, 58.3 (q,  $J_{\text{CF}} = 32.4$  Hz), 35.1, 26.1.  **$^{19}\text{F NMR}$**  (376 MHz,  $\text{CDCl}_3$ )  $\delta$  -74.8. **HRMS**: calculated for  $\text{C}_{37}\text{H}_{28}\text{F}_3\text{N}_4\text{O}_2^+$   $[\text{M}+\text{H}^+]$  617.2159, found 617.2160.

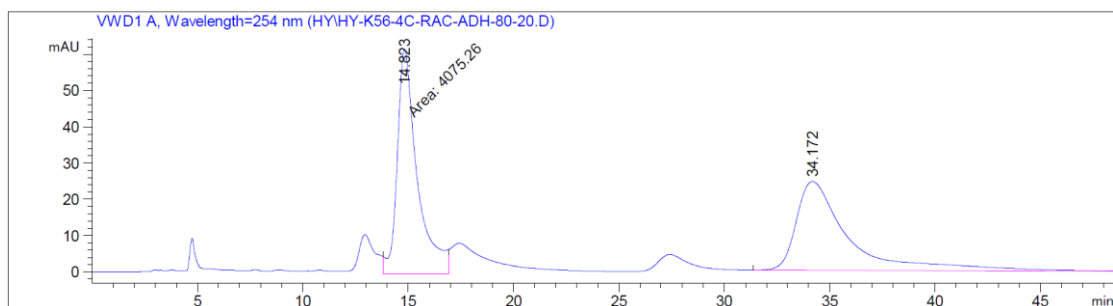

| Peak # | RetTime [min] | Type | Width [min] | Area [mAU*s] | Height [mAU] | Area %  |
|--------|---------------|------|-------------|--------------|--------------|---------|
| 1      | 14.823        | MM   | 1.0962      | 4075.25781   | 61.95957     | 49.1343 |
| 2      | 34.172        | BBA  | 2.4273      | 4218.85645   | 24.49642     | 50.8657 |

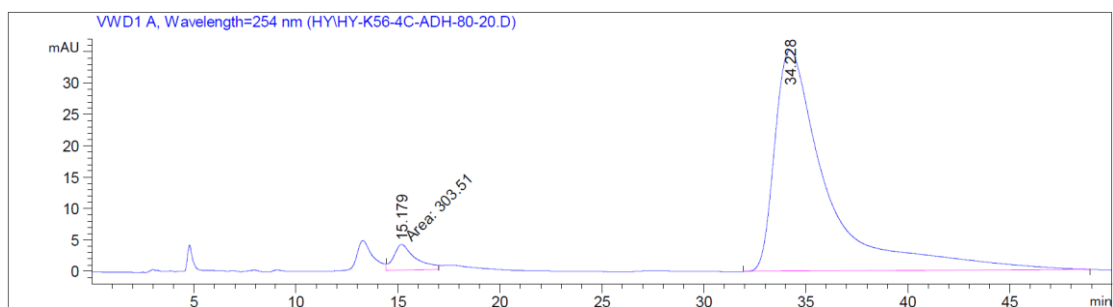

| Peak # | RetTime [min] | Type | Width [min] | Area [mAU*s] | Height [mAU] | Area %  |
|--------|---------------|------|-------------|--------------|--------------|---------|
| 1      | 15.179        | MM   | 1.2427      | 303.51022    | 4.07064      | 4.5882  |
| 2      | 34.228        | BB   | 2.5420      | 6311.46387   | 35.26560     | 95.4118 |

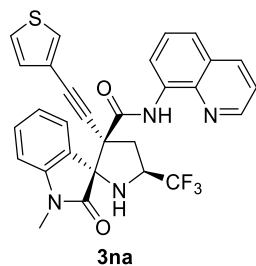

82 mg, 75% yield, brown solid.  $[\alpha]_D^{20}$  -142.40 (c 0.5, CHCl<sub>3</sub>, 94% ee)

**HPLC** (Daicel Chiralpak AD-H, hexane/*i*-PrOH = 70:30, 1.0 mL/min, 254 nm): tR (minor) = 9.5 min, tR (major) = 24.4 min.

**<sup>1</sup>H NMR** (400 MHz, CDCl<sub>3</sub>)  $\delta$  9.97 (s, 1H), 8.60 – 8.53 (p,  $J$  = 4.4 Hz, 1H), 8.50 (dd,  $J$  = 4.2, 1.7 Hz, 1H), 8.06 (dd,  $J$  = 8.3, 1.7 Hz, 1H), 7.88 – 7.83 (m, 1H), 7.45 – 7.41 (m, 2H), 7.40 – 7.29 (m, 4H), 7.23 – 7.16 (m, 1H), 7.02 (dd,  $J$  = 5.1, 3.7 Hz, 1H), 6.63 (d,  $J$  = 7.7 Hz, 1H), 4.60 – 4.42 (m, 1H), 3.96 (t,  $J$  = 12.0 Hz, 1H), 2.93 (s, 3H), 2.77 (dd,  $J$  = 12.2, 6.0 Hz, 1H), 2.67 (d,  $J$  = 7.1 Hz, 1H).

**<sup>13</sup>C NMR** (101 MHz, CDCl<sub>3</sub>)  $\delta$  175.6, 164.0, 147.9, 145.2, 138.2, 135.9, 133.7, 132.9, 130.6, 128.1, 127.6, 127.2, 127.1, 125.8 (q,  $J_{CF}$  = 279.5 Hz), 125.6, 125.1, 122.3, 121.8, 121.5, 121.5, 116.3, 108.4, 90.4, 83.0, 71.1, 59.5, 58.2 (q,  $J_{CF}$  = 32.3 Hz), 34.9, 26.1. **<sup>19</sup>F NMR** (376 MHz, CDCl<sub>3</sub>)  $\delta$  -74.9.

**HRMS**: calculated for C<sub>29</sub>H<sub>22</sub>F<sub>3</sub>N<sub>4</sub>O<sub>2</sub>S<sup>+</sup> [M+H<sup>+</sup>] 547.1410, found 547.1418.

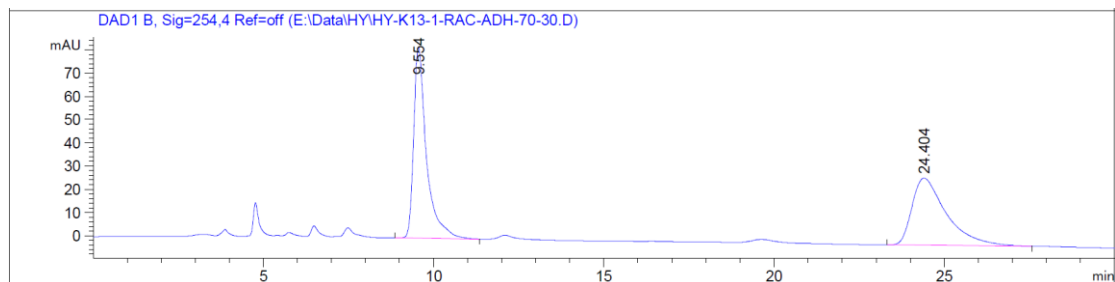

| Peak # | RetTime [min] | Type | Width [min] | Area [mAU*s] | Height [mAU] | Area %  |
|--------|---------------|------|-------------|--------------|--------------|---------|
| 1      | 9.554         | BB   | 0.3811      | 2151.06250   | 82.26332     | 51.4805 |
| 2      | 24.404        | BB   | 1.0030      | 2027.33923   | 28.87894     | 48.5195 |

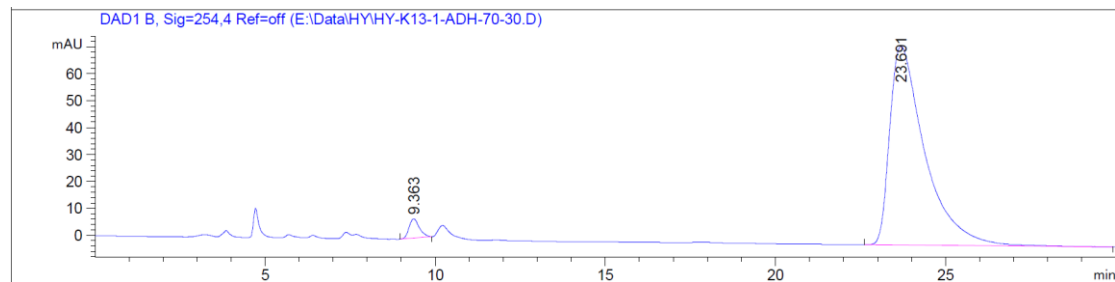

| Peak # | RetTime [min] | Type | Width [min] | Area [mAU*s] | Height [mAU] | Area %  |
|--------|---------------|------|-------------|--------------|--------------|---------|
| 1      | 9.363         | BB   | 0.3208      | 151.43472    | 7.15719      | 2.7710  |
| 2      | 23.691        | BBA  | 1.0601      | 5313.59229   | 73.96822     | 97.2290 |

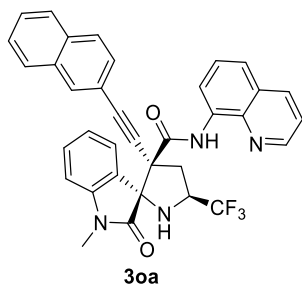

90 mg, 76% yield, yellow solid.  $[\alpha]_{20}^D$  -174.40 (c 0.5,  $\text{CHCl}_3$ , 94% ee)

**HPLC** (Daicel Chiralpak AD-H, hexane/*i*-PrOH = 70:30, 1.0 mL/min, 254 nm): tR (minor) = 7.0 min, tR (major) = 20.8 min.

**$^1\text{H}$  NMR** (400 MHz,  $\text{CDCl}_3$ )  $\delta$  10.11 (s, 1H), 8.64 – 8.57 (m, 1H), 8.49 (dd,  $J$  = 4.2, 1.5 Hz, 1H), 8.06 (s, 1H), 8.03 (dd,  $J$  = 8.3, 1.5 Hz, 1H), 7.91 (d,  $J$  = 7.4 Hz, 1H), 7.84 – 7.76 (m, 3H), 7.56 (dd,  $J$  = 8.5, 1.3 Hz, 1H), 7.52 – 7.46 (m, 2H), 7.45 – 7.39 (m, 2H), 7.38 – 7.31 (m, 2H), 7.16 (t,  $J$  = 7.5 Hz, 1H), 6.60 (d,  $J$  = 7.8 Hz, 1H), 4.69 – 4.50 (m, 1H), 4.02 (t,  $J$  = 11.6 Hz, 1H), 2.92 (s, 3H), 2.86 – 2.66 (m, 2H).  **$^{13}\text{C}$  NMR** (101 MHz,  $\text{CDCl}_3$ )  $\delta$  175.6, 164.2, 147.8, 145.1, 138.2, 136.0, 133.7, 133.0, 132.7, 131.9, 130.6, 128.2, 127.9, 127.7, 127.6, 127.5, 127.1, 127.1, 126.8, 125.8 (q,  $J_{\text{CF}}$  = 279.6 Hz), 125.6, 125.1, 122.1, 121.8, 121.5, 118.8, 116.2, 108.3, 90.0, 86.9, 71.2, 59.4, 58.3 (q,  $J_{\text{CF}}$  = 32.2 Hz), 35.0, 26.1.  **$^{19}\text{F}$  NMR** (376 MHz,  $\text{CDCl}_3$ )  $\delta$  -74.7. **HRMS**: calculated for  $\text{C}_{35}\text{H}_{26}\text{F}_3\text{N}_4\text{O}_2^+$   $[\text{M}+\text{H}^+]$  591.2002, found 591.2000.

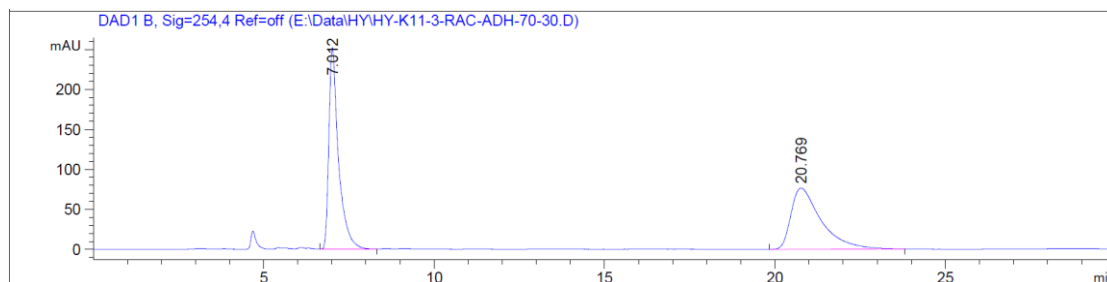

| Peak # | RetTime [min] | Type | Width [min] | Area [mAU*s] | Height [mAU] | Area %  |
|--------|---------------|------|-------------|--------------|--------------|---------|
| 1      | 7.012         | BB   | 0.2842      | 4924.34668   | 251.76924    | 51.1120 |
| 2      | 20.769        | BB   | 0.8716      | 4710.07813   | 76.57426     | 48.8880 |

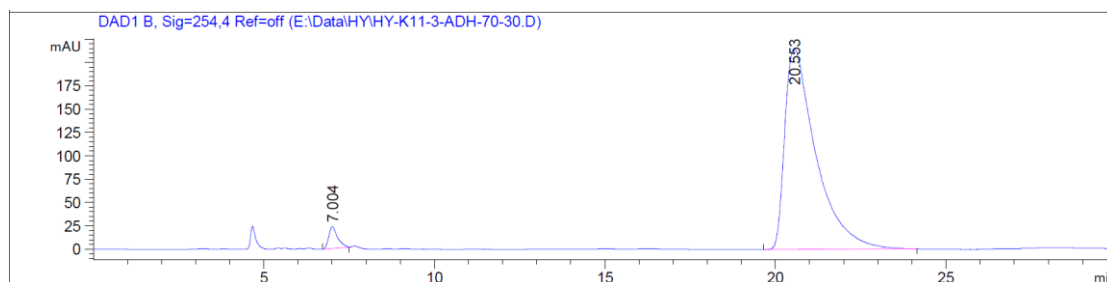

| Peak # | RetTime [min] | Type | Width [min] | Area [mAU*s] | Height [mAU] | Area %  |
|--------|---------------|------|-------------|--------------|--------------|---------|
| 1      | 7.004         | BB   | 0.2672      | 417.84659    | 23.52635     | 2.9679  |
| 2      | 20.553        | BB   | 0.9157      | 1.36611e4    | 215.47522    | 97.0321 |

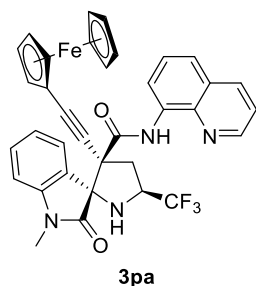

114 mg, 85% yield, yellow solid.  $[\alpha]_D^{20}$  97.60 (c 0.5, CHCl<sub>3</sub>, 91% ee)

**HPLC** (Daicel Chiralpak AD-H, hexane/*i*-PrOH = 70:30, 1.0 mL/min, 254 nm): tR (minor) = 9.0 min, tR (major) = 16.3 min.

**<sup>1</sup>H NMR** (400 MHz, CDCl<sub>3</sub>)  $\delta$  9.89 (s, 1H), 8.63 (dd,  $J$  = 6.7, 1.8 Hz, 1H), 8.51 (d,  $J$  = 3.7 Hz, 1H), 8.07 (d,  $J$  = 8.1 Hz, 1H), 7.96 (d,  $J$  = 7.4 Hz, 1H), 7.50 – 7.43 (m, 2H), 7.39 (t,  $J$  = 7.7 Hz, 1H), 7.35 (dd,  $J$  = 8.2, 4.2 Hz, 1H), 7.29 (d,  $J$  = 7.5 Hz, 1H), 6.58 (d,  $J$  = 7.7 Hz, 1H), 4.55 (s, 1H), 4.52 – 4.41 (m, 2H), 4.25 (d,  $J$  = 10.8 Hz, 2H), 4.08 (s, 5H), 3.91 (t,  $J$  = 11.6 Hz, 1H), 2.89 (s, 3H), 2.81 – 2.46 (m, 1H). **<sup>13</sup>C NMR** (101 MHz, CDCl<sub>3</sub>)  $\delta$  175.7, 164.7, 147.9, 145.3, 138.1, 136.0, 133.9, 130.6, 127.6, 127.3, 125.9, 125.8 (q,  $J_{CF}$  = 279.6 Hz), 125.4, 122.0, 121.7, 121.5, 116.3, 108.4, 88.6, 82.7, 71.5, 71.4, 70.9, 69.8, 69.1, 69.0, 67.1, 63.5, 59.4, 58.2 (q,  $J_{CF}$  = 32.2 Hz), 35.1, 26.1. **<sup>19</sup>F NMR** (376 MHz, CDCl<sub>3</sub>)  $\delta$  -75.0. **HRMS**: calculated for C<sub>35</sub>H<sub>27</sub>F<sub>3</sub>FeN<sub>4</sub>NaO<sub>2</sub><sup>+</sup> [M+Na<sup>+</sup>] 671.1328, found 671.1322.

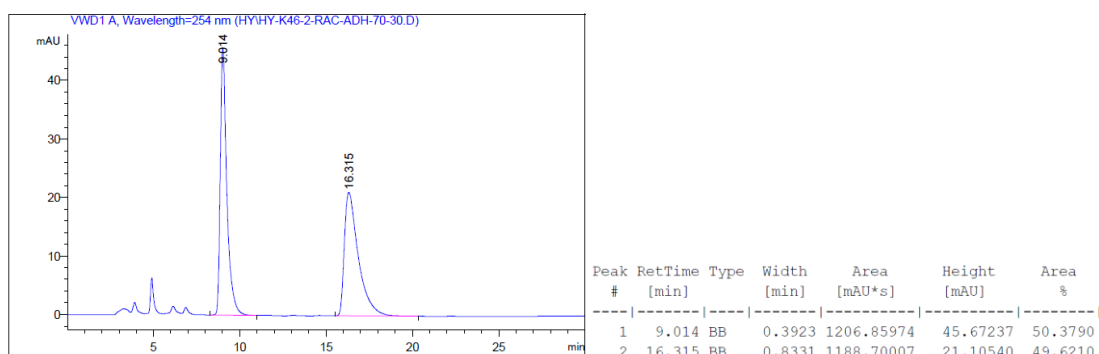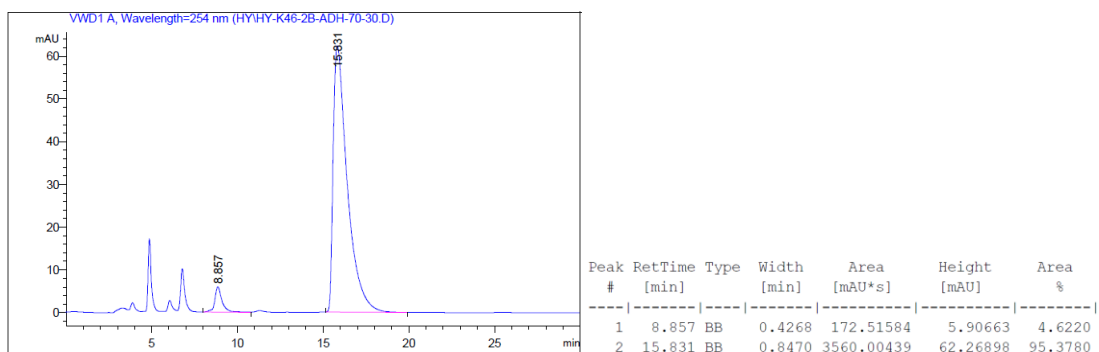



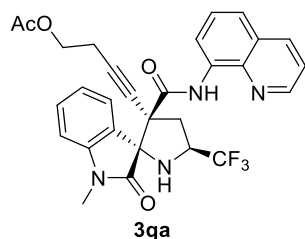

90 mg, 79% yield, yellow solid.  $[\alpha]_D^{20}$  -174.40 (c 0.5, CHCl<sub>3</sub>, 96% ee)

**HPLC** (Daicel Chiralpak AD-H, hexane/*i*-PrOH = 70:30, 1.0 mL/min, 254 nm): tR (minor) = 7.7 min, tR (major) = 9.5 min.

**<sup>1</sup>H NMR** (400 MHz, CDCl<sub>3</sub>)  $\delta$  9.89 (s, 1H), 8.63 (dd,  $J$  = 6.7, 1.8 Hz, 1H), 8.51 (d,  $J$  = 3.7 Hz, 1H), 8.07 (d,  $J$  = 8.1 Hz, 1H), 7.96 (d,  $J$  = 7.4 Hz, 1H), 7.50 – 7.43 (m, 2H), 7.39 (t,  $J$  = 7.7 Hz, 1H), 7.35 (dd,  $J$  = 8.2, 4.2 Hz, 1H), 7.29 (d,  $J$  = 7.5 Hz, 1H), 6.58 (d,  $J$  = 7.7 Hz, 1H), 4.55 (s, 1H), 4.52 – 4.41 (m, 2H), 4.25 (d,  $J$  = 10.8 Hz, 2H), 4.08 (s, 5H), 3.91 (t,  $J$  = 11.6 Hz, 1H), 2.89 (s, 3H), 2.81 – 2.46 (m, 1H). **<sup>13</sup>C NMR** (101 MHz, CDCl<sub>3</sub>)  $\delta$  175.7, 164.7, 147.9, 145.3, 138.1, 136.0, 133.9, 130.6, 127.6, 127.3, 125.9, 125.8 (q,  $J_{CF}$  = 279.6 Hz), 125.4, 122.0, 121.7, 121.5, 116.3, 108.4, 88.6, 82.7, 71.5, 71.4, 70.9, 69.8, 69.1, 69.0, 67.1, 63.5, 59.4, 58.2 (q,  $J_{CF}$  = 32.2 Hz), 35.1, 26.1. **<sup>19</sup>F NMR** (376 MHz, CDCl<sub>3</sub>)  $\delta$  -75.0. **HRMS**: calculated for C<sub>29</sub>H<sub>25</sub>F<sub>3</sub>N<sub>4</sub>NaO<sub>4</sub><sup>+</sup> [M+Na<sup>+</sup>] 573.1720, found 573.1718.

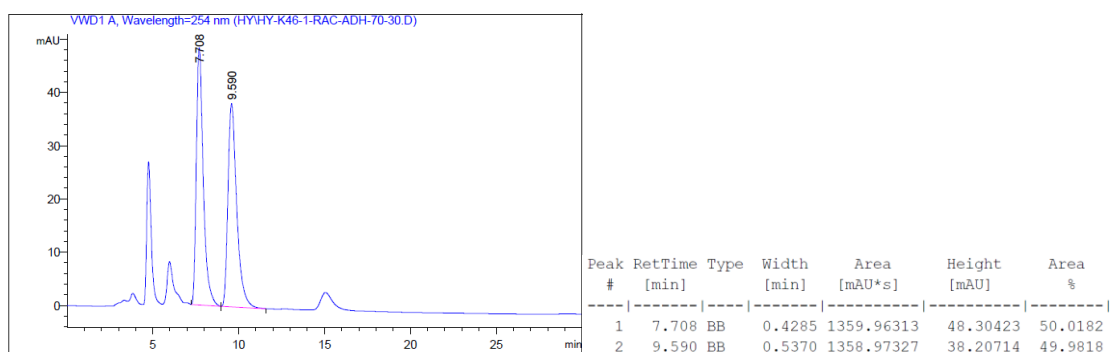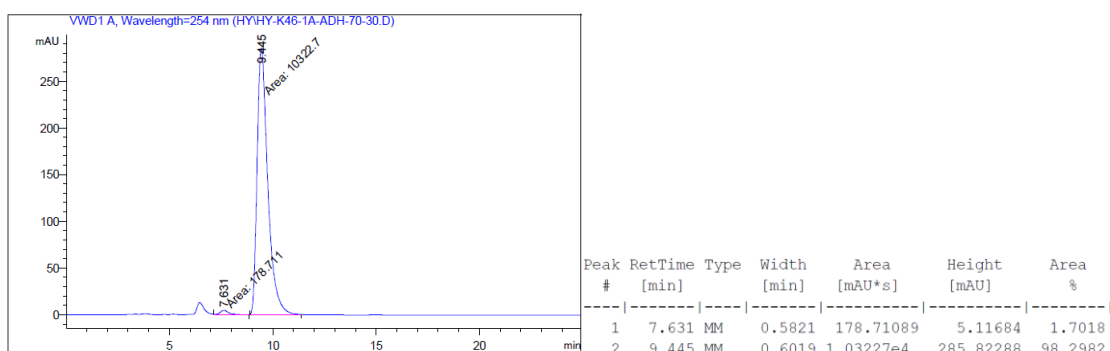

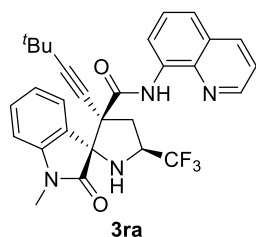

28 mg, 27% yield, yellow solid.  $[\alpha]_D^{20}$  -67.40 (c 0.5, CHCl<sub>3</sub>, 97% ee)

**HPLC** (Daicel Chiralpak AD-H, hexane/*i*-PrOH = 80:20, 1.0 mL/min, 254 nm): tR (minor) = 7.1 min, tR (major) = 11.5 min.

**<sup>1</sup>H NMR** (400 MHz, CDCl<sub>3</sub>)  $\delta$  10.04 (s, 1H), 8.56 (p,  $J$  = 4.5 Hz, 1H), 8.49 (dd,  $J$  = 4.2, 1.5 Hz, 1H), 8.06 (dd,  $J$  = 8.3, 1.5 Hz, 1H), 7.83 (d,  $J$  = 7.3 Hz, 1H), 7.45 – 7.40 (m, 2H), 7.35 (dd,  $J$  = 8.3, 4.2 Hz, 1H), 7.29 (d,  $J$  = 7.7 Hz, 1H), 7.14 (t,  $J$  = 7.5 Hz, 1H), 6.51 (d,  $J$  = 7.8 Hz, 1H), 4.51 – 4.33 (m, 1H), 3.84 (t,  $J$  = 11.5 Hz, 1H), 2.90 (s, 3H), 2.71 – 2.47 (m, 2H), 1.33 (s, 9H). **<sup>13</sup>C NMR** (101 MHz, CDCl<sub>3</sub>)  $\delta$  175.8, 164.9, 147.7, 144.8, 138.2, 135.9, 133.8, 130.4, 127.5, 127.0, 125.7 (q,  $J_{CF}$  = 279.5 Hz), 125.6, 125.2, 121.6, 121.4, 116.0, 107.9, 98.7, 76.3, 71.2, 58.8, 58.2 (q,  $J_{CF}$  = 32.3 Hz), 35.0, 30.6, 27.8, 26.0. **<sup>19</sup>F NMR** (376 MHz, CDCl<sub>3</sub>)  $\delta$  -74.7. **HRMS**: calculated for C<sub>29</sub>H<sub>28</sub>F<sub>3</sub>N<sub>4</sub>O<sub>2</sub><sup>+</sup> [M+H<sup>+</sup>] 521.2159, found 521.1961.

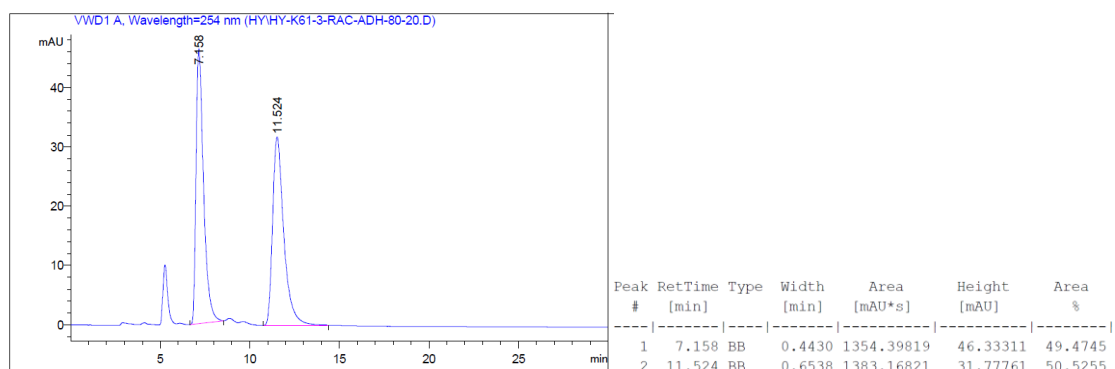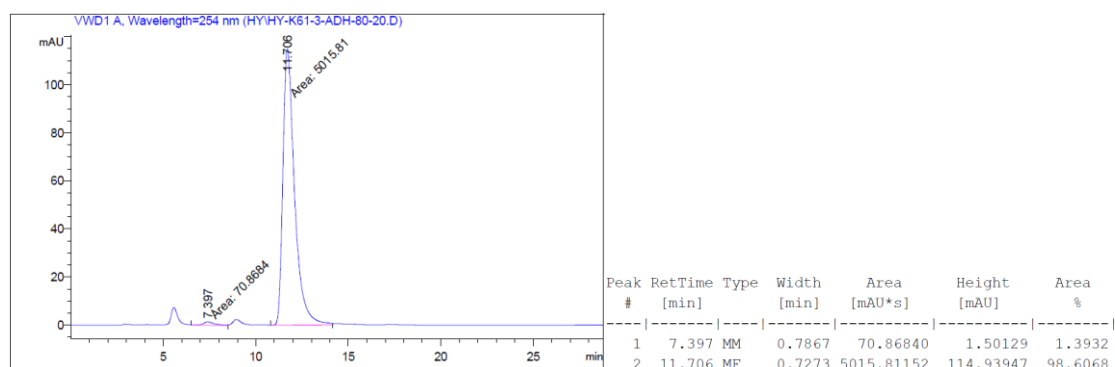

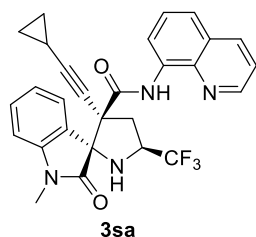

91 mg, 90% yield, yellow solid.  $[\alpha]_D^{20}$  -86.80 (c 0.5, CHCl<sub>3</sub>, 91% ee)

**HPLC** (Daicel Chiralpak AD-H, hexane/*i*-PrOH = 70:30, 1.0 mL/min, 254 nm): tR (minor) = 12.5 min, tR (major) = 14.1 min.

**<sup>1</sup>H NMR** (400 MHz, CDCl<sub>3</sub>)  $\delta$  9.89 (s, 1H), 8.63 – 8.46 (m, 2H), 8.08 (dd,  $J$  = 8.3, 1.8 Hz, 1H), 7.79 (d,  $J$  = 7.2 Hz, 1H), 7.47 – 7.41 (m, 2H), 7.37 (dd,  $J$  = 8.3, 4.2 Hz, 1H), 7.31 (t,  $J$  = 7.6 Hz, 1H), 7.15 (t,  $J$  = 7.6 Hz, 1H), 6.57 (d,  $J$  = 7.6 Hz, 1H), 4.54 – 4.35 (m, 1H), 3.83 (t,  $J$  = 11.6 Hz, 1H), 2.67 – 2.51 (m, 2H), 2.58 (dd,  $J$  = 12.0, 6.2 Hz, 2H), 1.48 – 1.34 (m, 1H), 0.95 – 0.78 (m, 4H).

**<sup>13</sup>C NMR** (101 MHz, CDCl<sub>3</sub>)  $\delta$  176.2, 165.2, 148.1, 145.4, 138.6, 136.3, 134.2, 130.7, 128.0, 127.5, 126.2, 126.1 (q,  $J_{CF}$  = 279.5 Hz), 125.4, 122.1, 122.0, 121.8, 116.6, 108.5, 93.9, 73.1, 71.4, 59.2, 58.6 (q,  $J_{CF}$  = 32.2 Hz), 35.5, 26.4, 8.6, 8.5. **<sup>19</sup>F NMR** (376 MHz, CDCl<sub>3</sub>)  $\delta$  -74.9. **HRMS**: calculated for C<sub>28</sub>H<sub>24</sub>F<sub>3</sub>N<sub>4</sub>O<sub>2</sub><sup>+</sup> [M+H<sup>+</sup>] 505.1846, found 505.1846.

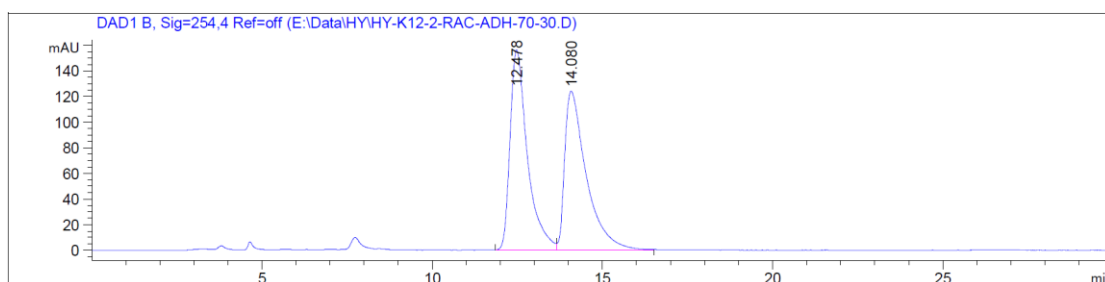

| Peak # | RetTime [min] | Type | Width [min] | Area [mAU*s] | Height [mAU] | Area %  |
|--------|---------------|------|-------------|--------------|--------------|---------|
| 1      | 12.478        | BV   | 0.5270      | 5527.52930   | 156.15616    | 50.4183 |
| 2      | 14.080        | VB   | 0.6383      | 5435.80713   | 123.79910    | 49.5817 |

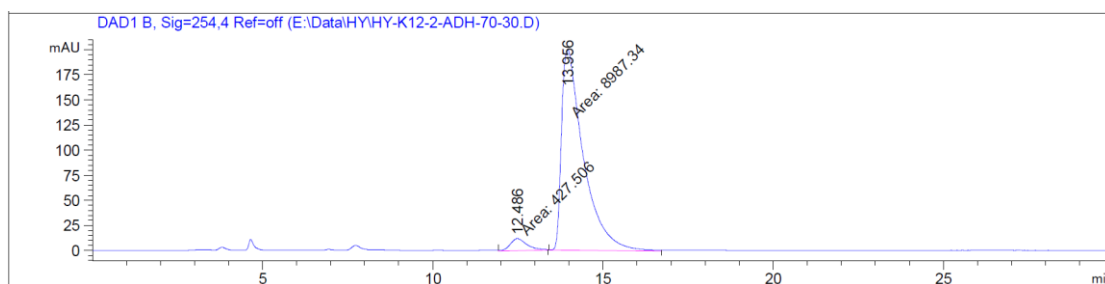

| Peak # | RetTime [min] | Type | Width [min] | Area [mAU*s] | Height [mAU] | Area %  |
|--------|---------------|------|-------------|--------------|--------------|---------|
| 1      | 12.486        | MM   | 0.5865      | 427.50595    | 12.14859     | 4.5408  |
| 2      | 13.956        | MM   | 0.7483      | 8987.34473   | 200.18144    | 95.4592 |

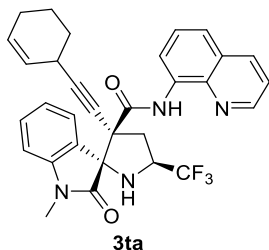

89 mg, 82% yield, yellow solid.  $[\alpha]_D^{20}$  -131.60 (c 0.5,  $\text{CHCl}_3$ , 94% ee)

**HPLC** (Daicel Chiralpak AD-H, hexane/*i*-PrOH = 90:10, 1.0 mL/min, 254 nm): tR (minor) = 5.1 min, tR (major) = 9.1 min.

**$^1\text{H}$  NMR** (400 MHz,  $\text{CDCl}_3$ )  $\delta$  9.92 (s, 1H), 8.60 – 8.52 (m, 1H), 8.47 (dd,  $J$  = 4.1, 1.3 Hz, 1H), 8.05 (dd,  $J$  = 8.2, 1.2 Hz, 1H), 7.84 (d,  $J$  = 7.5 Hz, 1H), 7.42 (d,  $J$  = 4.4 Hz, 2H), 7.38 – 7.31 (m, 2H), 7.17 (t,  $J$  = 7.6 Hz, 1H), 6.58 (d,  $J$  = 7.8 Hz, 1H), 6.35 – 6.20 (m, 1H), 4.54 – 4.37 (m, 1H), 3.90 (t,  $J$  = 11.5 Hz, 1H), 2.91 (s, 3H), 2.77 – 2.38 (m, 2H), 2.26 – 2.18 (m, 2H), 2.16 – 2.10 (m, 2H), 1.70 – 1.56 (m, 4H).  **$^{13}\text{C}$  NMR** (101 MHz,  $\text{CDCl}_3$ )  $\delta$  175.8, 164.6, 147.8, 145.1, 138.2, 136.6, 135.9, 133.8, 130.4, 127.5, 127.1, 125.8 (q,  $J_{\text{CF}}$  = 279.5 Hz), 125.6, 125.2, 122.0, 121.6, 121.4, 119.6, 116.2, 108.2, 91.3, 83.7, 70.9, 59.2, 58.2 (q,  $J_{\text{CF}}$  = 32.2 Hz), 35.2, 28.8, 26.0, 25.6, 22.1, 21.3.  **$^{19}\text{F}$  NMR** (376 MHz,  $\text{CDCl}_3$ )  $\delta$  -74.8. **HRMS**: calculated for  $\text{C}_{31}\text{H}_{28}\text{F}_3\text{N}_4\text{O}_2^+$   $[\text{M}+\text{H}^+]$  545.2159, found 545.2155.

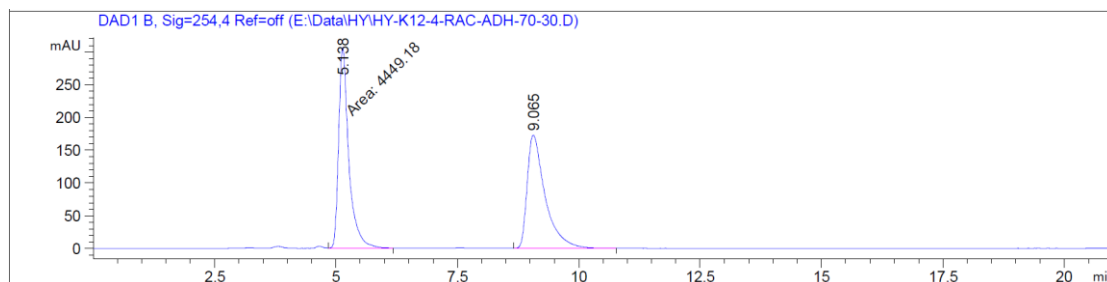

| Peak # | RetTime [min] | Type | Width [min] | Area [mAU*s] | Height [mAU] | Area %  |
|--------|---------------|------|-------------|--------------|--------------|---------|
| 1      | 5.138         | FM   | 0.2420      | 4449.18066   | 306.47208    | 50.1090 |
| 2      | 9.065         | BB   | 0.3814      | 4429.81885   | 172.60815    | 49.8910 |

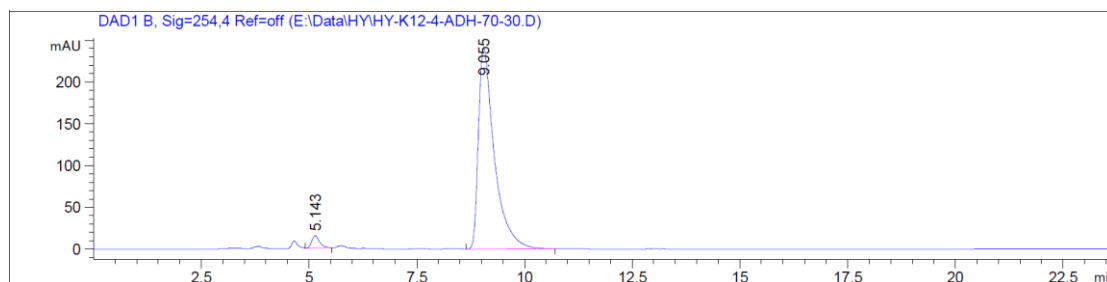

| Peak # | RetTime [min] | Type | Width [min] | Area [mAU*s] | Height [mAU] | Area %  |
|--------|---------------|------|-------------|--------------|--------------|---------|
| 1      | 5.143         | VB   | 0.1947      | 191.55075    | 14.82431     | 3.0065  |
| 2      | 9.055         | BB   | 0.3797      | 6179.61279   | 240.56281    | 96.9935 |

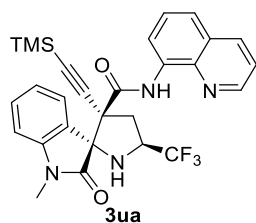

69 mg, 62% yield, white solid.  $[\alpha]_D^{20}$  -76.80 (c 0.5, CHCl<sub>3</sub>, 92% ee)

**HPLC** (Daicel Chiralpak AD-H, hexane/*i*-PrOH = 90:10, 1.0 mL/min, 254 nm): tR (minor) = 4.6 min, tR (major) = 7.0 min.

**<sup>1</sup>H NMR** (400 MHz, CDCl<sub>3</sub>)  $\delta$  9.97 (s, 1H), 8.60 – 8.53 (m, 1H), 8.49 (dd, *J* = 4.2, 1.7 Hz, 1H), 8.07 (dd, *J* = 8.3, 1.8 Hz, 1H), 7.85 (d, *J* = 7.5 Hz, 1H), 7.44 (d, *J* = 4.6 Hz, 2H), 7.36 (dd, *J* = 8.3, 4.2 Hz, 1H), 7.31 (t, *J* = 7.7 Hz, 1H), 7.14 (t, *J* = 7.6 Hz, 1H), 6.54 (d, *J* = 7.3 Hz, 1H), 4.52-4.34 (m, 1H), 3.86 (t, *J* = 11.6 Hz, 1H), 2.90 (s, 3H), 2.63 (dd, *J* = 12.3, 6.1 Hz, 2H), 0.26 (s, 9H). **<sup>13</sup>C NMR** (101 MHz, CDCl<sub>3</sub>)  $\delta$  176.0, 164.5, 148.2, 145.4, 138.6, 136.3, 134.2, 130.9, 128.0, 127.5, 126.1 (q, *J*<sub>CF</sub> = 279.8 Hz), 125.7, 125.6, 122.1, 122.1, 121.8, 116.6, 108.5, 103.0, 95.7, 71.1, 59.9, 58.7 (q, *J*<sub>CF</sub> = 32.4 Hz), 35.1, 26.5, 0.0. **<sup>19</sup>F NMR** (376 MHz, CDCl<sub>3</sub>)  $\delta$  -74.9. **HRMS**: calculated for C<sub>28</sub>H<sub>27</sub>F<sub>3</sub>N<sub>4</sub>NaO<sub>2</sub>Si<sup>+</sup> [M+Na<sup>+</sup>] 559.1748, found 559.1758.

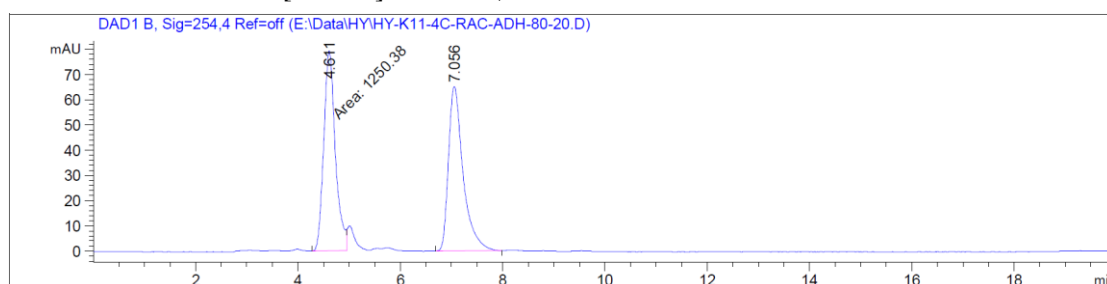

| Peak # | RetTime [min] | Type | Width [min] | Area [mAU*s] | Height [mAU] | Area %  |
|--------|---------------|------|-------------|--------------|--------------|---------|
| 1      | 4.611         | MF   | 0.2630      | 1250.37512   | 79.24776     | 49.1787 |
| 2      | 7.056         | BB   | 0.2975      | 1292.13721   | 65.11919     | 50.8213 |

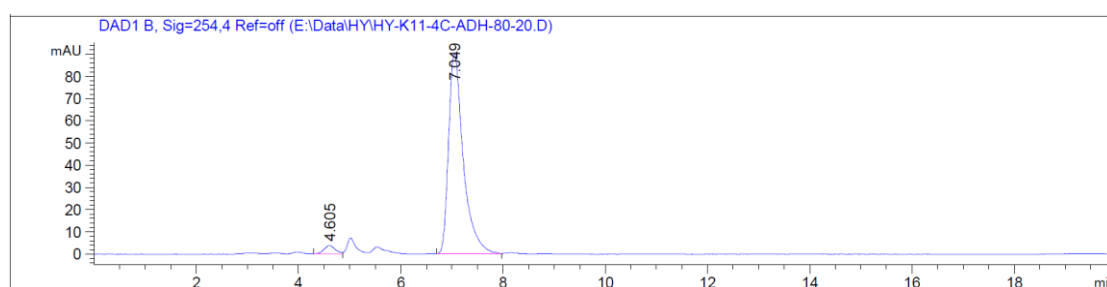

| Peak # | RetTime [min] | Type | Width [min] | Area [mAU*s] | Height [mAU] | Area %  |
|--------|---------------|------|-------------|--------------|--------------|---------|
| 1      | 4.605         | BV   | 0.2198      | 56.26894     | 3.69165      | 3.0477  |
| 2      | 7.049         | BB   | 0.2971      | 1790.03320   | 90.36163     | 96.9523 |

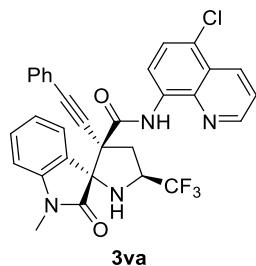

94 mg, 79% yield, white solid.  $[\alpha]_D^{20}$  -128.80 (c 0.5, CHCl<sub>3</sub>, 94% ee)

**HPLC** (Daicel Chiralpak AD-H, hexane/*i*-PrOH = 90:10, 1.0 mL/min, 254 nm): tR (minor) = 7.0 min, tR (major) = 19.6 min.

**<sup>1</sup>H NMR** (400 MHz, CDCl<sub>3</sub>)  $\delta$  9.96 (s, 1H), 8.56 – 8.48 (m, 2H), 8.43 (dd,  $J$  = 8.5, 1.6 Hz, 1H), 7.88 (dd,  $J$  = 7.6, 0.8 Hz, 1H), 7.57 – 7.52 (m, 2H), 7.50 – 7.43 (m, 2H), 7.40 – 7.33 (m, 4H), 7.18 (td,  $J$  = 7.6, 0.9 Hz, 1H), 6.61 (d,  $J$  = 7.7 Hz, 1H), 4.62 – 4.44 (m, 1H), 3.96 (t,  $J$  = 11.2, 1H), 2.93 (s, 3H), 2.80 – 2.62 (m, 2H). **<sup>13</sup>C NMR** (101 MHz, CDCl<sub>3</sub>)  $\delta$  175.8, 163.8, 150.4, 148.3, 145.2, 139.0, 131.7, 130.9, 130.5, 129.1, 128.5, 127.3, 125.8, 125.8 (q,  $J_{CF}$  = 279.5 Hz), 125.1, 122.1, 121.8, 120.5, 120.1, 116.5, 108.4, 104.1, 89.4, 86.9, 71.2, 59.2, 58.4 (q,  $J_{CF}$  = 32.3 Hz), 55.7, 35.1, 26.2. **<sup>19</sup>F NMR** (376 MHz, CDCl<sub>3</sub>)  $\delta$  -74.8.

**HRMS**: calculated for C<sub>31</sub>H<sub>22</sub>ClF<sub>3</sub>N<sub>4</sub>NaO<sub>2</sub><sup>+</sup> [M+Na<sup>+</sup>] 597.1276, found 597.1277.

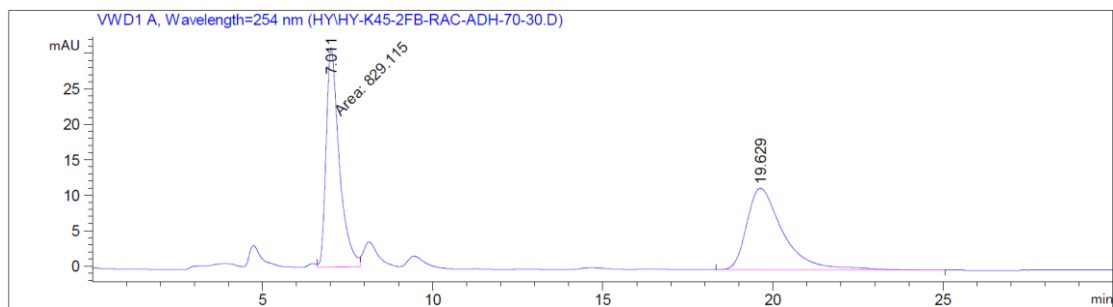

| Peak # | RetTime [min] | Type | Width [min] | Area [mAU*s] | Height [mAU] | Area %  |
|--------|---------------|------|-------------|--------------|--------------|---------|
| 1      | 7.011         | MF   | 0.4469      | 829.11536    | 30.92293     | 49.3639 |
| 2      | 19.629        | BB   | 1.0991      | 850.48352    | 11.49601     | 50.6361 |

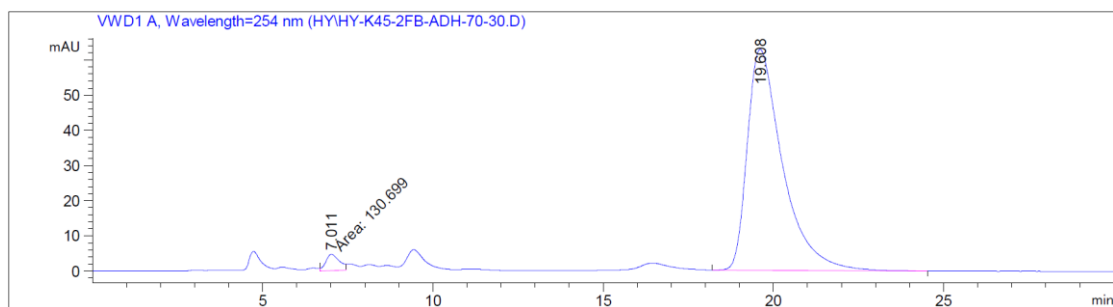

| Peak # | RetTime [min] | Type | Width [min] | Area [mAU*s] | Height [mAU] | Area %  |
|--------|---------------|------|-------------|--------------|--------------|---------|
| 1      | 7.011         | MM   | 0.4654      | 130.69930    | 4.68016      | 2.7975  |
| 2      | 19.608        | BB   | 1.0833      | 4541.34375   | 62.83101     | 97.2025 |

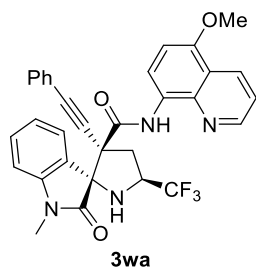

98 mg, 91% yield, yellow solid.  $[\alpha]_D^{20}$  -122.40 (c 0.5,  $\text{CHCl}_3$ , 94% ee)

**HPLC** (Daicel Chiralpak AD-H, hexane/*i*-PrOH = 70:30, 1.0 mL/min, 254 nm): tR (minor) = 8.7 min, tR (major) = 12.9 min.

**$^1\text{H}$  NMR** (400 MHz,  $\text{CDCl}_3$ )  $\delta$  9.80 (s, 1H), 8.55 – 8.41 (m, 2H), 7.87 (dd,  $J = 7.6, 0.8$  Hz), 7.59 – 7.51 (m, 2H), 7.41 – 7.31 (m, 5H), 7.15 (td,  $J = 7.6, 0.9$  Hz, 1H), 6.74 (d,  $J = 8.6$  Hz, 1H), 6.62 (d,  $J = 7.7$  Hz, 1H), 4.60 – 4.44 (m, 1H), 4.00 – 3.88 (m, 4H), 2.94 (s, 3H), 2.85 – 2.45 (m, 2H).

**$^{13}\text{C}$  NMR** (101 MHz,  $\text{CDCl}_3$ )  $\delta$  175.8, 163.8, 150.4, 148.3, 145.2, 139.0, 131.7, 130.9, 130.5, 129.1, 128.5, 127.3, 125.8, 125.8 (q,  $J_{\text{CF}} = 279.5$  Hz), 125.1, 122.1, 121.8, 120.5, 120.1, 116.5, 108.4, 104.1, 89.4, 86.9, 71.2, 59.2, 58.4 (q,  $J_{\text{CF}} = 32.3$  Hz), 55.7, 35.1, 26.2.  **$^{19}\text{F}$  NMR** (376 MHz,  $\text{CDCl}_3$ )  $\delta$  -74.9.

**HRMS**: calculated for  $\text{C}_{32}\text{H}_{25}\text{F}_3\text{N}_4\text{NaO}_3^+$   $[\text{M}+\text{Na}^+]$  593.1771, found 593.1763.

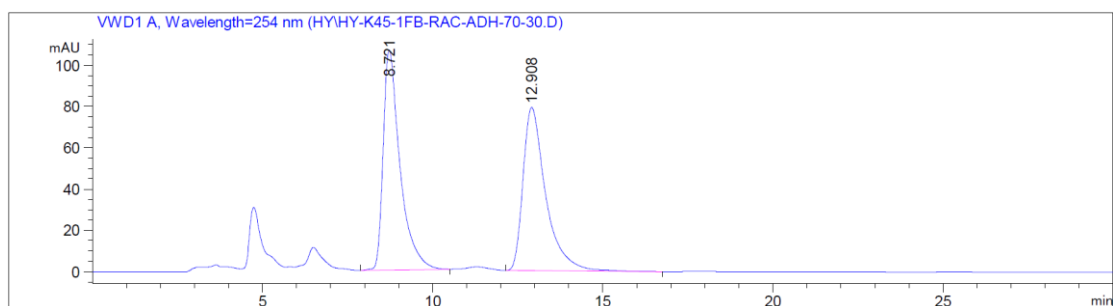

| Peak # | RetTime [min] | Type | Width [min] | Area [mAU*s] | Height [mAU] | Area %  |
|--------|---------------|------|-------------|--------------|--------------|---------|
| 1      | 8.721         | BB   | 0.5076      | 3666.19189   | 106.50940    | 49.9526 |
| 2      | 12.908        | BB   | 0.6912      | 3673.15186   | 79.18708     | 50.0474 |

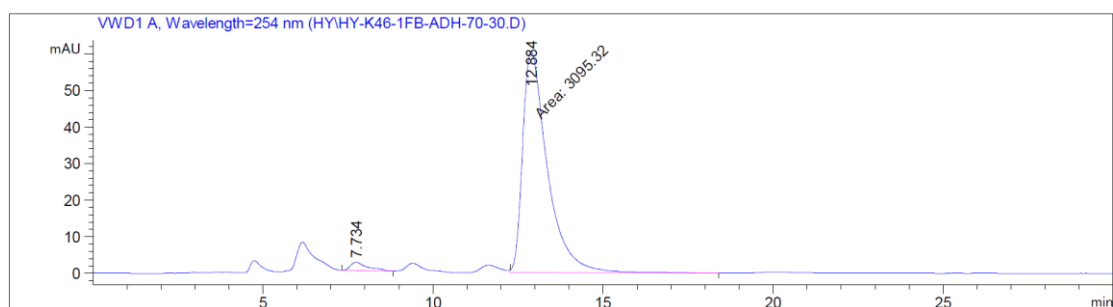

| Peak # | RetTime [min] | Type | Width [min] | Area [mAU*s] | Height [mAU] | Area %  |
|--------|---------------|------|-------------|--------------|--------------|---------|
| 1      | 7.734         | BB   | 0.4928      | 79.65002     | 2.30710      | 2.5087  |
| 2      | 12.884        | FM   | 0.8507      | 3095.32422   | 60.64151     | 97.4913 |

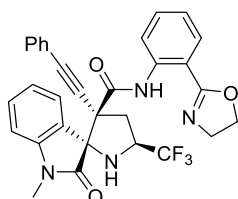

**3xa**

87 mg, 78% yield, yellow solid.  $[\alpha]_D^{20}$  -139.20 (c 0.5, CHCl<sub>3</sub>, 94% ee)

**HPLC** (Daicel Chiralpak AD-H, hexane/*i*-PrOH = 80:20, 1.0 mL/min, 254 nm): tR (minor) = 6.8 min, tR (major) = 10.3 min.

**<sup>1</sup>H NMR** (400 MHz, CDCl<sub>3</sub>)  $\delta$  12.41 (s, 1H), 8.53 (dd,  $J$  = 8.4, 0.8 Hz, 1H), 7.84 – 7.78 (m, 1H), 7.75 (dd,  $J$  = 7.9, 1.5 Hz, 1H), 7.52 – 7.47 (m, 2H), 7.39 – 7.29 (m, 5H), 7.07 (td,  $J$  = 7.6, 0.8 Hz, 1H), 7.02 (td,  $J$  = 7.9, 1.1 Hz, 1H), 6.71 (d,  $J$  = 7.7 Hz, 1H), 4.58 – 4.43 (m, 1H), 4.28 – 4.14 (m, 2H), 3.88 (t,  $J$  = 11.5 Hz, 1H), 3.77 (t,  $J$  = 9.5 Hz, 2H), 3.03 (s, 3H), 2.76 (dd,  $J$  = 12.0, 6.0 Hz, 1H), 2.66 – 2.45 (m, 1H). **<sup>13</sup>C NMR** (101 MHz, CDCl<sub>3</sub>)  $\delta$  176.2, 165.7, 164.0, 145.1, 139.1, 132.2, 131.6, 130.1, 129.0, 128.8, 128.4, 126.7, 125.8 (q,  $J_{CF}$  = 279.5 Hz), 124.7, 122.6, 122.0, 121.9, 119.8, 113.4, 108.1, 88.7, 86.7, 70.8, 66.0, 59.6, 58.3 (q,  $J_{CF}$  = 32.2 Hz), 54.3, 35.7, 26.1. **<sup>19</sup>F NMR** (376 MHz, CDCl<sub>3</sub>)  $\delta$  -75.1. **HRMS**: calculated for C<sub>31</sub>H<sub>26</sub>F<sub>3</sub>N<sub>4</sub>O<sub>3</sub><sup>+</sup> [M+H<sup>+</sup>] 559.1952, found 559.1956.

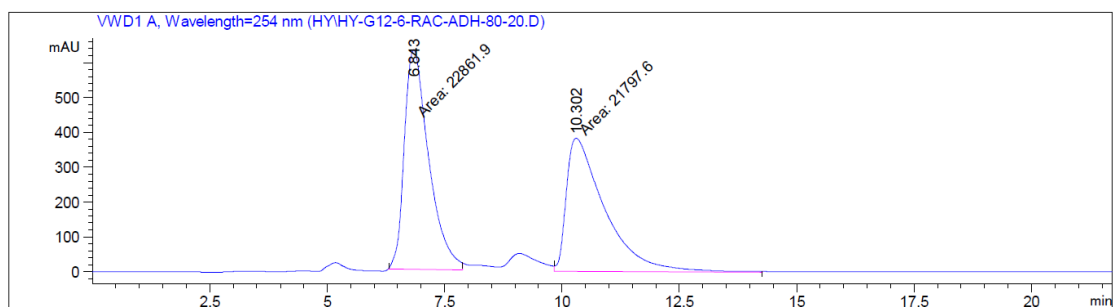

| Peak # | RetTime [min] | Type | Width [min] | Area [mAU*s] | Height [mAU] | Area %  |
|--------|---------------|------|-------------|--------------|--------------|---------|
| 1      | 6.843         | MM   | 0.6044      | 2.28619e4    | 630.42719    | 51.1916 |
| 2      | 10.302        | MM   | 0.9510      | 2.17976e4    | 382.02557    | 48.8084 |

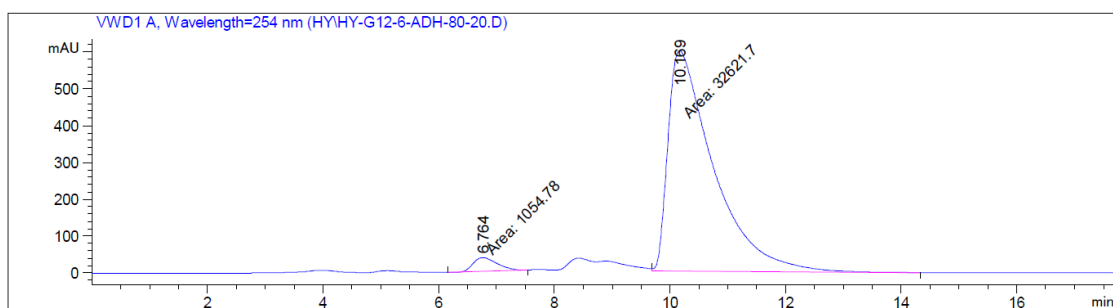

| Peak # | RetTime [min] | Type | Width [min] | Area [mAU*s] | Height [mAU] | Area %  |
|--------|---------------|------|-------------|--------------|--------------|---------|
| 1      | 6.764         | MM   | 0.4745      | 1054.77625   | 37.04625     | 3.1321  |
| 2      | 10.169        | FM   | 0.9088      | 3.26217e4    | 598.23950    | 96.8679 |



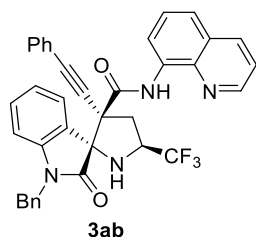

101 mg, 82% yield, white soak.  $[\alpha]_D^{20}$  -108.00 (c 0.5, CHCl<sub>3</sub>, 91% ee)

**HPLC** (Daicel Chiralpak AD-H, hexane/*i*-PrOH = 70:30, 1.0 mL/min, 254 nm): tR (minor) = 10.1 min, tR (major) = 22.1 min.

**<sup>1</sup>H NMR** (400 MHz, CDCl<sub>3</sub>) δ 10.07 (s, 1H), 8.62 (dd, *J* = 6.7, 2.3 Hz, 1H), 8.30 (dd, *J* = 4.2, 1.7 Hz, 1H), 7.99 (dd, *J* = 8.3, 1.6 Hz, 1H), 7.96 – 7.91 (m, 1H), 7.55 – 7.49 (m, 2H), 7.48 – 7.41 (m, 2H), 7.37 – 7.31 (m, 3H), 7.30 – 7.22 (m, 3H), 7.16 (td, *J* = 7.6, 0.9 Hz, 1H), 7.01 (d, *J* = 7.3 Hz, 2H), 6.85 (t, *J* = 7.4 Hz, 1H), 6.70 (t, *J* = 7.7 Hz, 2H), 6.54 (d, *J* = 7.7 Hz, 1H), 5.09 (d, *J* = 15.7 Hz, 1H), 4.62 – 4.48 (m, 1H), 4.29 (d, *J* = 15.7 Hz, 1H), 4.07 (t, *J* = 11.6 Hz, 1H), 2.86 – 2.67 (m, 2H).

**<sup>13</sup>C NMR** (101 MHz, CDCl<sub>3</sub>) δ 147.7, 144.5, 138.1, 135.8, 135.1, 133.8, 131.7, 130.5, 129.1, 128.5, 128.0, 127.6, 127.1, 127.0, 126.9, 125.8 (q, *J*<sub>CF</sub> = 279.5 Hz), 125.4, 125.3, 122.3, 121.8, 121.6, 121.4, 116.3, 109.6, 89.5, 86.7, 70.9, 59.0, 58.2 (q, *J*<sub>CF</sub> = 32.3 Hz), 44.1, 35.1. **<sup>19</sup>F NMR** (376 MHz, CDCl<sub>3</sub>) δ -74.7. **HRMS**: calculated for C<sub>37</sub>H<sub>28</sub>F<sub>3</sub>N<sub>4</sub>O<sub>2</sub><sup>+</sup> [M+H<sup>+</sup>] 617.2159, found 617.2164.

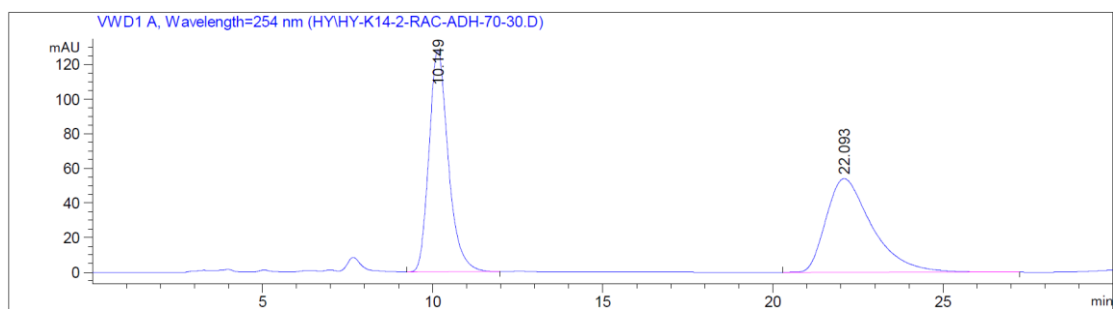

| Peak # | RetTime [min] | Type | Width [min] | Area [mAU*s] | Height [mAU] | Area %  |
|--------|---------------|------|-------------|--------------|--------------|---------|
| 1      | 10.149        | BB   | 0.6000      | 5051.51416   | 128.12273    | 49.9324 |
| 2      | 22.093        | BB   | 1.4162      | 5065.19531   | 54.00531     | 50.0676 |

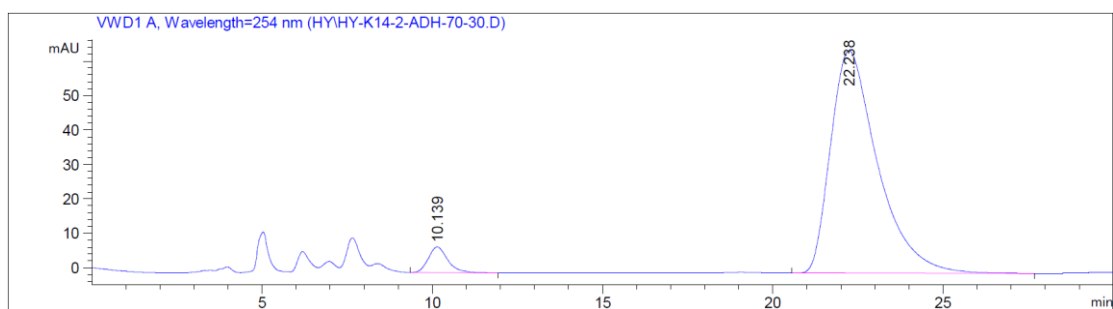

| Peak # | RetTime [min] | Type | Width [min] | Area [mAU*s] | Height [mAU] | Area %  |
|--------|---------------|------|-------------|--------------|--------------|---------|
| 1      | 10.139        | BB   | 0.6018      | 295.43027    | 7.43158      | 4.5518  |
| 2      | 22.238        | BB   | 1.4490      | 6194.92822   | 64.58998     | 95.4482 |

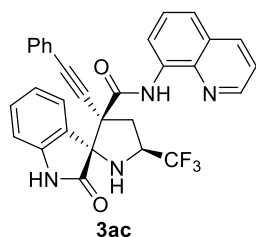

63 mg, 60% yield, white solid.  $[\alpha]_D^{20}$  -41.60 (c 0.5, CHCl<sub>3</sub>, 94% ee)

**HPLC** (Daicel Chiralpak AD-H, hexane/*i*-PrOH = 70:30, 1.0 mL/min, 254 nm): tR (minor) = 6.5 min, tR (major) = 29.7 min.

**<sup>1</sup>H NMR** (400 MHz, CDCl<sub>3</sub>)  $\delta$  10.14 (s, 1H), 8.58 – 8.47 (m, 2H), 8.00 (dd,  $J$  = 8.3, 1.6 Hz, 1H), 7.87 (d,  $J$  = 7.5 Hz, 1H), 7.58 – 7.51 (m, 2H), 7.39 – 7.26 (m, 7H), 7.13 (td,  $J$  = 7.6, 0.9 Hz, 1H), 6.72 (d,  $J$  = 7.7 Hz, 1H), 4.58 – 4.42 (m, 1H), 3.92 (t,  $J$  = 11.6 Hz, 1H), 2.77 – 2.60 (m, 2H). **<sup>13</sup>C NMR** (101 MHz, CDCl<sub>3</sub>)  $\delta$  178.0, 164.2, 147.8, 142.6, 138.3, 135.9, 133.7, 131.7, 130.6, 129.1, 128.5, 127.6, 127.1, 125.9, 125.8 (q,  $J_{CF}$  = 279.5 Hz), 125.4, 122.1, 121.8, 121.7, 121.4, 116.5, 110.6, 89.6, 86.6, 71.3, 59.1, 58.2 (q,  $J_{CF}$  = 32.3 Hz), 35.1. **<sup>19</sup>F NMR** (376 MHz, CDCl<sub>3</sub>)  $\delta$  -74.8. **HRMS**: calculated for C<sub>30</sub>H<sub>22</sub>F<sub>3</sub>N<sub>4</sub>O<sub>2</sub><sup>+</sup> [M+H<sup>+</sup>] 527.1689, found 527.1690.

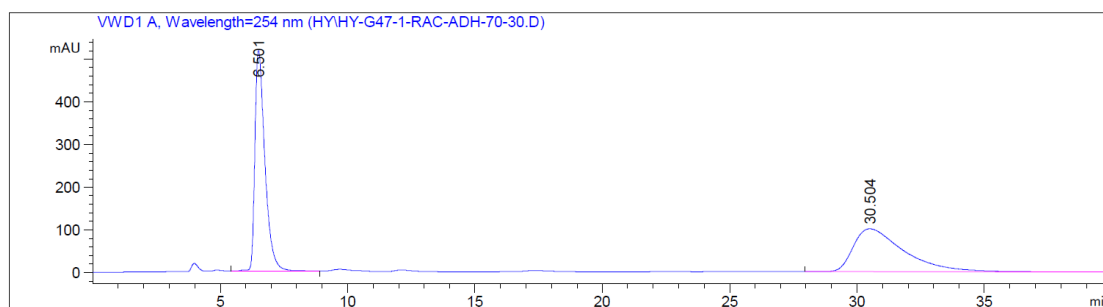

| Peak # | RetTime [min] | Type | Width [min] | Area [mAU*s] | Height [mAU] | Area %  |
|--------|---------------|------|-------------|--------------|--------------|---------|
| 1      | 6.501         | VV R | 0.4144      | 1.41515e4    | 517.00842    | 50.2868 |
| 2      | 30.504        | BBA  | 2.0550      | 1.39901e4    | 100.68818    | 49.7132 |

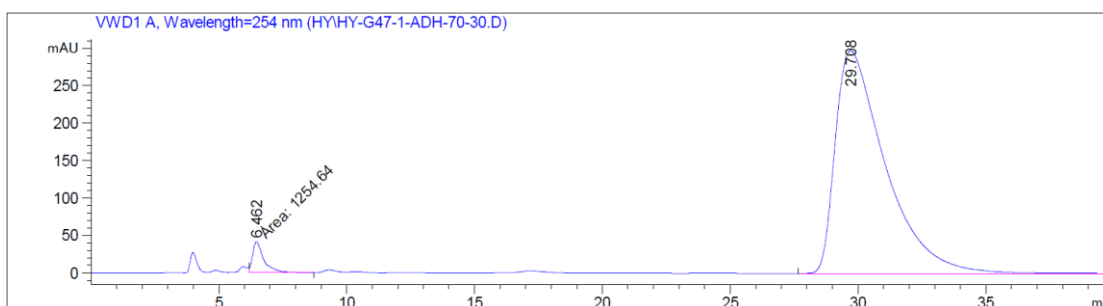

| Peak # | RetTime [min] | Type | Width [min] | Area [mAU*s] | Height [mAU] | Area %  |
|--------|---------------|------|-------------|--------------|--------------|---------|
| 1      | 6.462         | FM   | 0.5090      | 1254.63513   | 41.08524     | 3.0112  |
| 2      | 29.708        | BBA  | 1.9728      | 4.04107e4    | 297.11548    | 96.9888 |

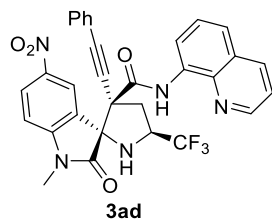

67 mg, 69% yield, brown solid.  $[\alpha]_D^{20}$  -110.00 (c 0.5, CHCl<sub>3</sub>, 93% ee)

**HPLC** (Daicel Chiralpak AD-H, hexane/*i*-PrOH = 70:30, 1.0 mL/min, 254 nm): tR (minor) = 6.8 min, tR (major) = 20.8 min.

**<sup>1</sup>H NMR** (400 MHz, CDCl<sub>3</sub>)  $\delta$  10.25 (s, 1H), 8.91 (d,  $J$  = 2.3 Hz, 1H), 8.57 (dd,  $J$  = 4.2, 1.6 Hz, 1H), 8.50 (dd,  $J$  = 7.1, 1.9 Hz, 1H), 8.32 (dd,  $J$  = 8.7, 2.3 Hz, 1H), 8.10 (dd,  $J$  = 8.3, 1.6 Hz, 1H), 7.69 – 7.62 (m, 2H), 7.50 – 7.43 (m, 2H), 7.43 – 7.36 (m, 5H), 6.77 (d,  $J$  = 8.7 Hz, 1H), 4.69 – 4.52 (m, 1H), 3.93 (t,  $J$  = 11.5 Hz, 1H), 3.13 (s, 2H), 2.88 (dd,  $J$  = 12.0, 6.0 Hz, 1H), 2.77 (d,  $J$  = 8.1 Hz, 1H). **<sup>13</sup>C NMR** (101 MHz, CDCl<sub>3</sub>)  $\delta$  176.2, 164.1, 151.0, 148.2, 142.8, 138.2, 136.2, 133.4, 131.9, 129.5, 128.6, 127.7, 127.5, 127.1, 126.8, 125.8 (q,  $J_{CF}$  = 279.6 Hz), 122.2, 121.7, 121.1, 120.9, 116.5, 107.8, 90.9, 85.2, 69.8, 60.2, 58.6 (q,  $J_{CF}$  = 32.7 Hz), 35.6, 26.7. **<sup>19</sup>F NMR** (376 MHz, CDCl<sub>3</sub>)  $\delta$  -74.9. **HRMS**: calculated for C<sub>31</sub>H<sub>23</sub>F<sub>3</sub>N<sub>5</sub>O<sub>4</sub><sup>+</sup> [M+H<sup>+</sup>] 586.1697, found 586.1702.

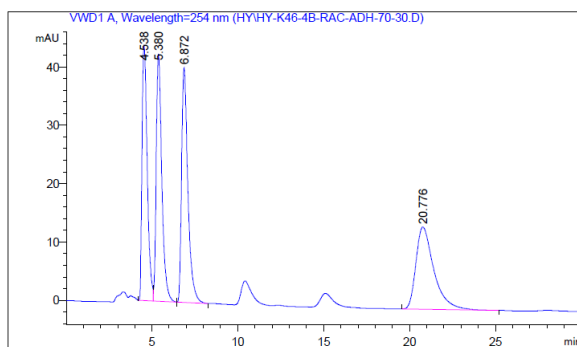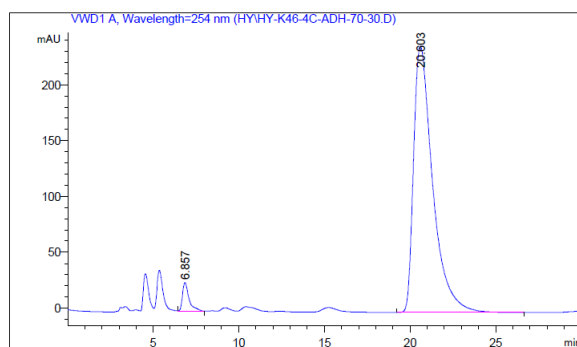

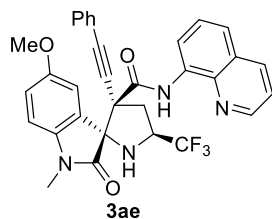

92 mg, 81% yield, yellow soak.  $[\alpha]_D^{20}$  -75.60 (c 0.5, CHCl<sub>3</sub>, 93% ee)

**HPLC** (Daicel Chiralpak AD-H, hexane/*i*-PrOH =70:30, 1.0 mL/min, 254 nm): tR (minor) = 8.0 min, tR (major) = 34.7 min.

**<sup>1</sup>H NMR** (400 MHz, CDCl<sub>3</sub>)  $\delta$  10.03 (s, 1H), 8.62 – 8.53 (m, 1H), 8.50 (dd,  $J$  = 4.2, 1.6 Hz, 1H), 8.06 (dd,  $J$  = 8.3, 1.6 Hz, 1H), 7.61 – 7.52 (m, 3H), 7.42 (d,  $J$  = 4.2 Hz, 2H), 7.39 – 7.31 (m, 4H), 6.87 (dd,  $J$  = 8.5, 2.6 Hz, 1H), 6.50 (d,  $J$  = 8.5 Hz, 1H), 4.64 – 4.44 (m, 1H), 3.98 (t,  $J$  = 11.6 Hz, 1H), 3.69 (s, 3H), 2.89 (s, 3H), 2.80 – 2.59 (m, 2H). **<sup>13</sup>C NMR** (101 MHz, CDCl<sub>3</sub>)  $\delta$  175.5, 164.2, 155.7, 147.8, 138.4, 138.1, 136.0, 133.7, 131.7, 129.1, 128.4, 127.5, 127.1, 126.6, 125.8 (q,  $J_{CF}$  = 279.6 Hz), 121.7, 121.5, 116.2, 115.5, 112.2, 108.7, 89.7, 86.6, 71.3, 59.3, 58.3 (q,  $J_{CF}$  = 32.3 Hz), 55.8, 34.9, 26.1. **<sup>19</sup>F NMR** (376 MHz, CDCl<sub>3</sub>)  $\delta$  -74.8. **HRMS**: calculated for C<sub>32</sub>H<sub>26</sub>F<sub>3</sub>N<sub>4</sub>O<sub>3</sub><sup>+</sup> [M+H<sup>+</sup>] 571.1952, found 571.1961.

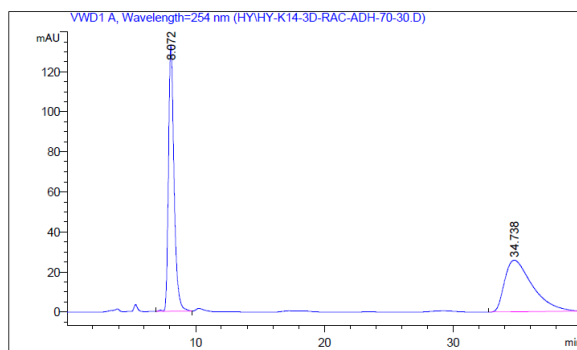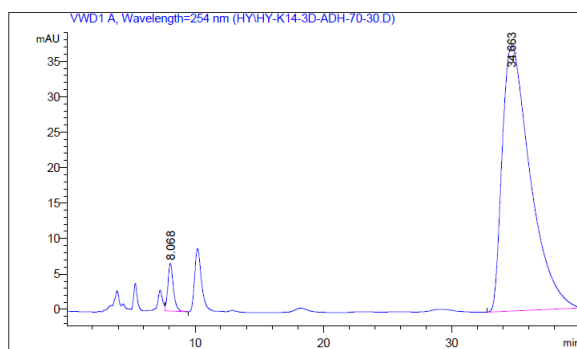

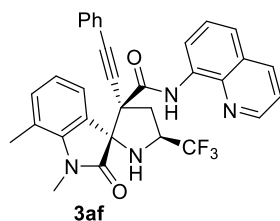

65 mg, 59% yield, white soak.  $[\alpha]_D^{20}$  -213.60 (c 0.5, CHCl<sub>3</sub>, 96% ee)

**HPLC** (Daicel Chiralpak AD-H, hexane/*i*-PrOH = 70:30, 1.0 mL/min, 254 nm): tR (minor) = 6.6 min, tR (major) = 17.9 min.

**<sup>1</sup>H NMR** (400 MHz, CDCl<sub>3</sub>)  $\delta$  9.95 (s, 1H), 8.65 – 8.58 (m, 1H), 8.44 (dd,  $J$  = 4.2, 1.7 Hz, 1H), 8.06 (dd,  $J$  = 8.3, 1.6 Hz, 1H), 7.73 – 7.67 (m, 1H), 7.56 – 7.50 (m, 2H), 7.46 – 7.41 (m, 2H), 7.39 – 7.32 (m, 4H), 7.09 – 7.03 (m, 2H), 4.62 – 4.42 (m, 1H), 3.95 (t,  $J$  = 11.7 Hz, 1H), 3.10 (s, 3H), 2.73 (dd,  $J$  = 12.2, 6.0 Hz, 1H), 2.66 – 2.52 (m, 1H), 2.08 (s, 3H). **<sup>13</sup>C NMR** (101 MHz, CDCl<sub>3</sub>)  $\delta$  176.5, 164.3, 147.8, 142.7, 138.1, 135.9, 134.3, 133.8, 131.6, 129.0, 128.4, 127.5, 127.1, 126.1, 125.8 (q,  $J_{CF}$  = 279.6 Hz), 123.0, 122.0, 121.7, 121.7, 121.4, 120.0, 116.0, 89.8, 86.5, 70.9, 59.5, 58.3 (q,  $J_{CF}$  = 32.2 Hz), 34.7, 29.4, 18.6. **<sup>19</sup>F NMR** (376 MHz, CDCl<sub>3</sub>)  $\delta$  -74.9. **HRMS**: calculated for C<sub>32</sub>H<sub>26</sub>F<sub>3</sub>N<sub>4</sub>O<sub>2</sub><sup>+</sup> [M+H<sup>+</sup>] 555.2002, found 555.2011.

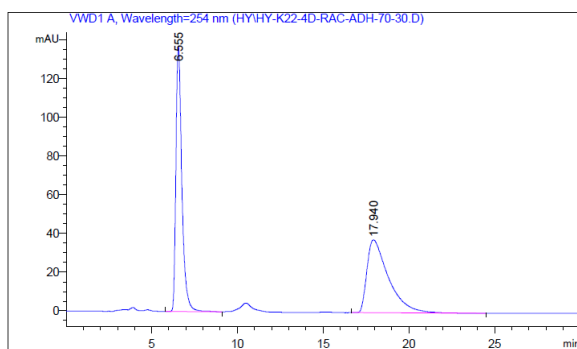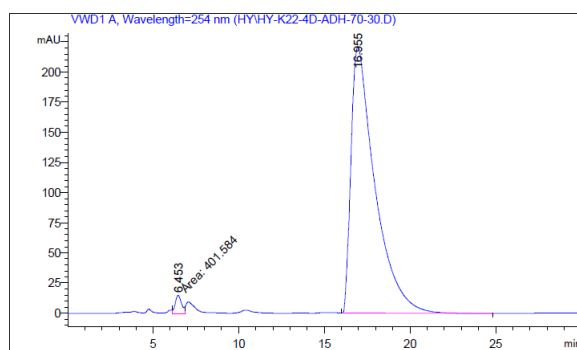

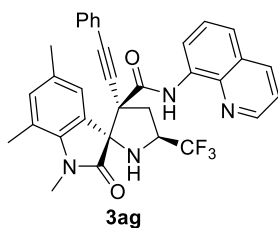

90 mg, 79% yield, yellow solid.  $[\alpha]_D^{20}$  -140.80 (c 0.5, CHCl<sub>3</sub>, 94% ee)

**HPLC** (Daicel Chiralpak AD-H, hexane/*i*-PrOH = 70:30, 1.0 mL/min, 254 nm): tR (minor) = 5.1 min, tR (major) = 25.7 min.

**<sup>1</sup>H NMR** (400 MHz, CDCl<sub>3</sub>)  $\delta$  9.94 (s, 1H), 8.61 (dd,  $J$  = 5.5, 3.5 Hz, 1H), 8.45 (dd,  $J$  = 4.2, 1.6 Hz, 1H), 8.06 (dd,  $J$  = 8.3, 1.5 Hz, 1H), 7.58 – 7.50 (m, 4H), 7.45 – 7.41 (m, 2H), 7.40 – 7.32 (m, 5H), 4.62 – 4.42 (m, 2H), 3.95 (t,  $J$  = 11.7 Hz, 1H), 3.07 (s, 2H), 2.72 (dd,  $J$  = 12.2, 5.9 Hz, 1H), 2.61 (s, 1H), 2.32 (s, 3H), 2.03 (s, 3H). **<sup>13</sup>C NMR** (101 MHz, CDCl<sub>3</sub>)  $\delta$  176.5, 164.3, 147.7, 140.2, 138.0, 135.9, 134.7, 133.8, 131.6, 131.3, 129.0, 128.4, 127.5, 127.1, 126.1, 125.8 (q,  $J_{CF}$  = 279.6 Hz), 123.8, 121.7, 121.6, 121.4, 119.6, 116.0, 89.9, 86.7, 71.1, 59.5, 58.3 (q,  $J_{CF}$  = 32.1 Hz), 34.6, 29.4, 20.8, 18.4. **<sup>19</sup>F NMR** (376 MHz, CDCl<sub>3</sub>)  $\delta$  -74.9. **HRMS**: calculated for C<sub>33</sub>H<sub>28</sub>F<sub>3</sub>N<sub>4</sub>O<sub>2</sub><sup>+</sup> [M+H<sup>+</sup>] 569.2159, found 569.2169.

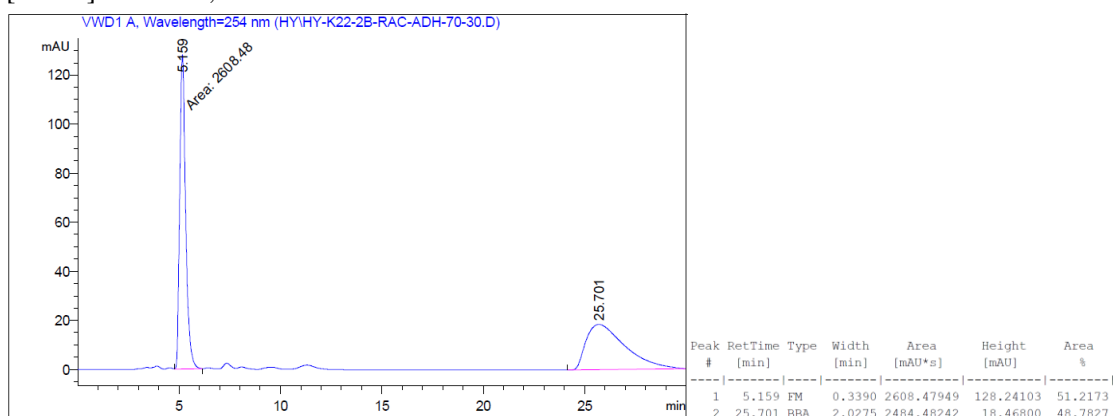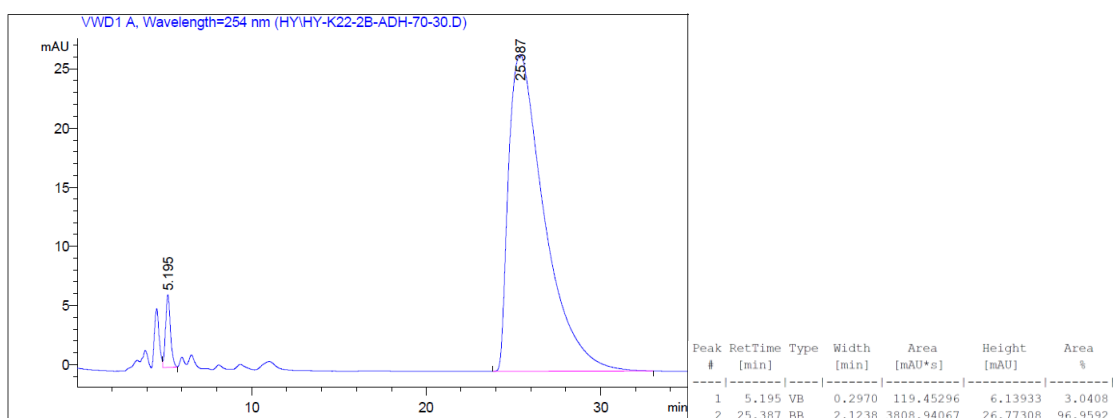

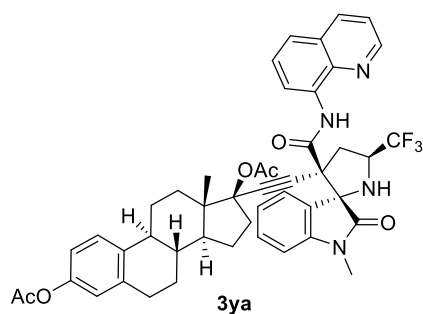

124 mg, 76% yield, white solid.  $[\alpha]_D^{20}$  -89.20 (c 0.5, CHCl<sub>3</sub>, 91% ee)

**HPLC** (Daicel Chiralpak AD-H, hexane/*i*-PrOH = 90:10, 1.0 mL/min, 254 nm): tR (major) = 24.3 min, tR (minor) = 33.8min.

**<sup>1</sup>H NMR** (400 MHz, CDCl<sub>3</sub>)  $\delta$  11.16 (s, 1H), 8.95 – 8.82 (m, 2H), 8.18 (dd,  $J$  = 8.3, 1.6 Hz, 1H), 7.70 (d,  $J$  = 7.3 Hz, 1H), 7.59 – 7.52 (m, 2H), 7.48 (dd,  $J$  = 8.3, 4.2 Hz, 1H), 7.37 (td,  $J$  = 7.8, 0.9 Hz, 1H), 7.23 (d,  $J$  = 8.5 Hz, 1H), 7.20 – 7.14 (m, 1H), 6.90 (d,  $J$  = 7.7 Hz, 1H), 6.82 (dd,  $J$  = 8.5, 2.5 Hz, 1H), 6.78 – 6.74 (m, 1H), 4.61 – 4.47 (m, 1H), 3.63 (d,  $J$  = 14.3 Hz, 1H), 3.53 (d,  $J$  = 13.4 Hz, 1H), 3.31 – 3.16 (m, 4H), 2.89 – 2.75 (m, 3H), 2.58 (d,  $J$  = 13.4 Hz, 1H), 2.38 – 2.29 (m, 2H), 2.26 (s, 3H), 2.23 – 2.07 (m, 3H), 2.05 (s, 3H), 2.01 – 1.93 (m, 1H), 1.93 – 1.77 (m, 3H), 1.62 – 1.48 (m, 3H), 1.37 – 1.20 (m, 2H), 1.01 (s, 3H). **<sup>13</sup>C NMR** (101 MHz, CDCl<sub>3</sub>)  $\delta$  174.9, 169.8, 169.4, 167.1, 148.4, 148.0, 143.3, 138.9, 138.0, 137.4, 136.3, 134.0, 132.7, 129.4, 127.9, 127.3, 126.3, 123.9, 123.9 (q,  $J_{CF}$  = 282.2 Hz), 123.0, 122.3, 121.6, 121.4, 118.6, 117.2, 108.7, 88.5, 86.1, 84.7, 73.8 (q,  $J_{CF}$  = 29.9 Hz), 67.9, 51.6, 49.9, 48.7, 48.3, 43.6, 38.7, 37.3, 34.0, 29.3, 27.0, 26.6, 26.2, 23.3, 21.3, 21.0, 13.5. **<sup>19</sup>F NMR** (376 MHz, CDCl<sub>3</sub>)  $\delta$  -67.9. **HRMS**: calculated for C<sub>47</sub>H<sub>46</sub>F<sub>3</sub>N<sub>4</sub>O<sub>6</sub> [M+H<sup>+</sup>] 819.3364, found 819.3367.

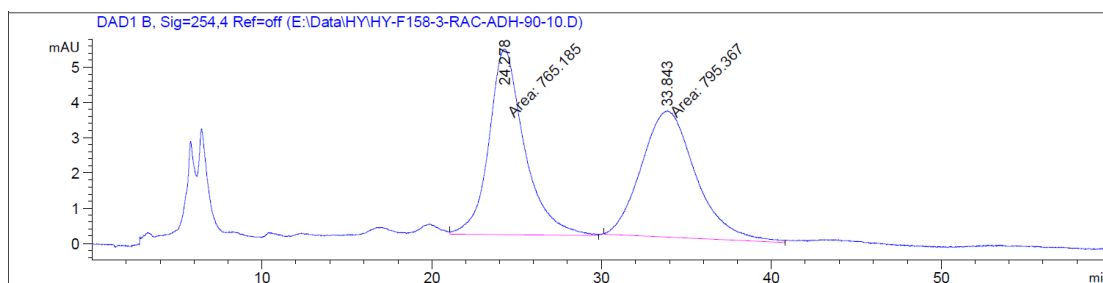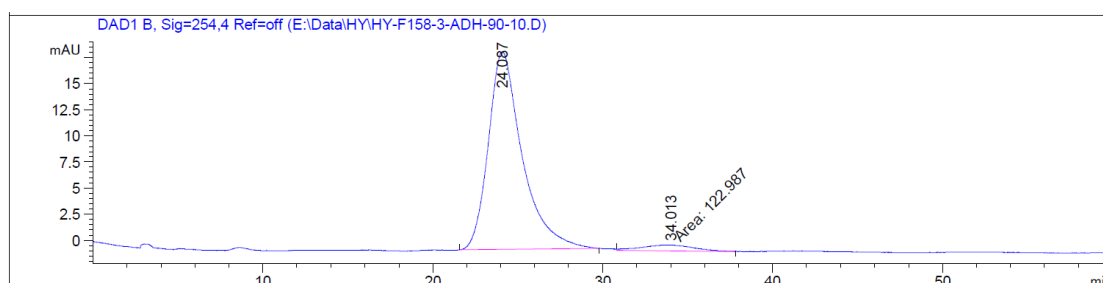

## 8. NMR spectras

$^1\text{H}$  NMR spectrum of S2 in  $\text{CDCl}_3$ , 400 MHz

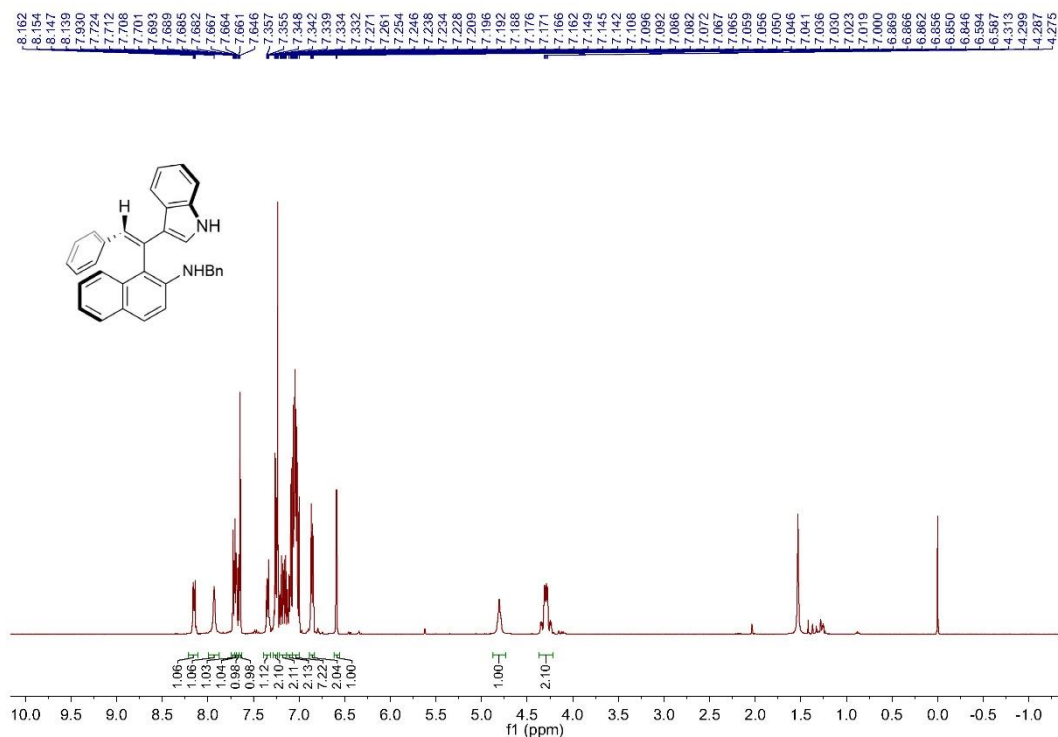

$^{13}\text{C}$  NMR spectrum of S2 in  $\text{CDCl}_3$ , 101 MHz

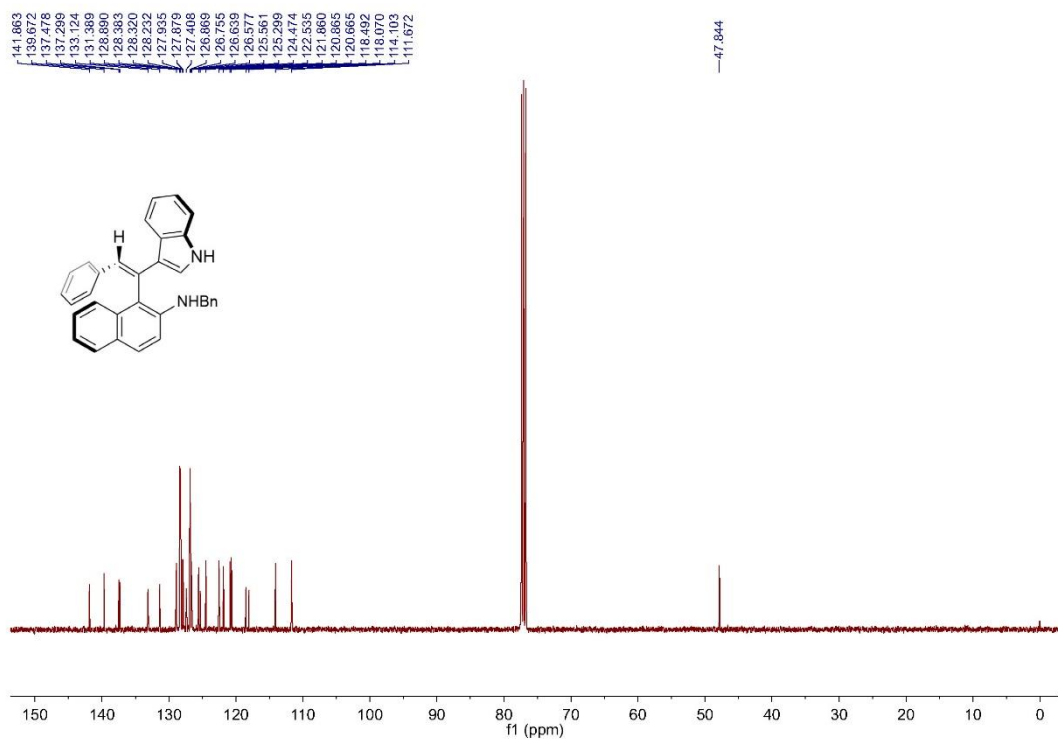



<sup>1</sup>H NMR spectrum of S3 in DMSO, 400 MHz

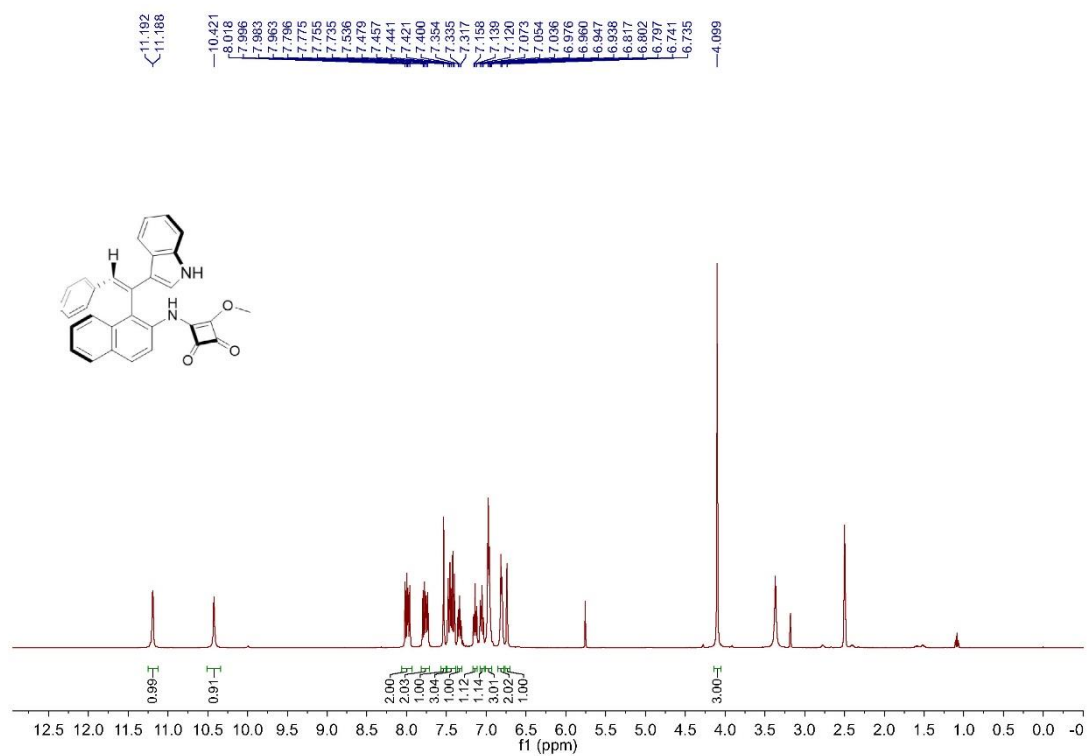

<sup>13</sup>C NMR spectrum of S3 in DMSO, 101 MHz

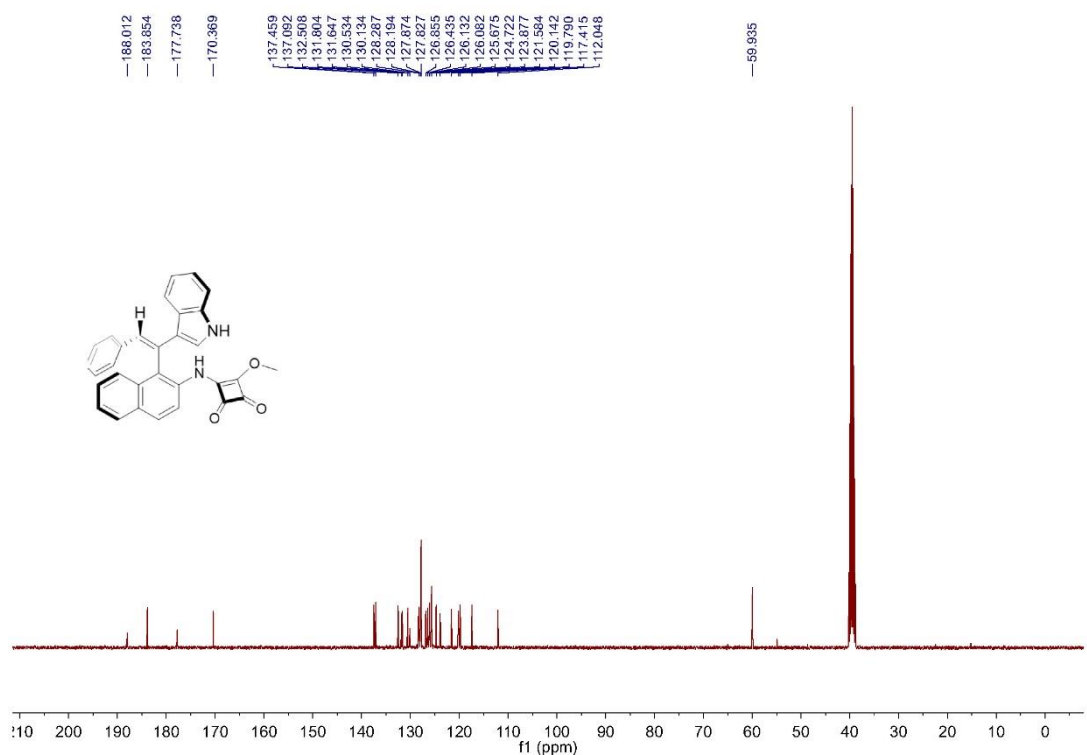

<sup>1</sup>H NMR spectrum of Cat. I in DMSO, 400 MHz

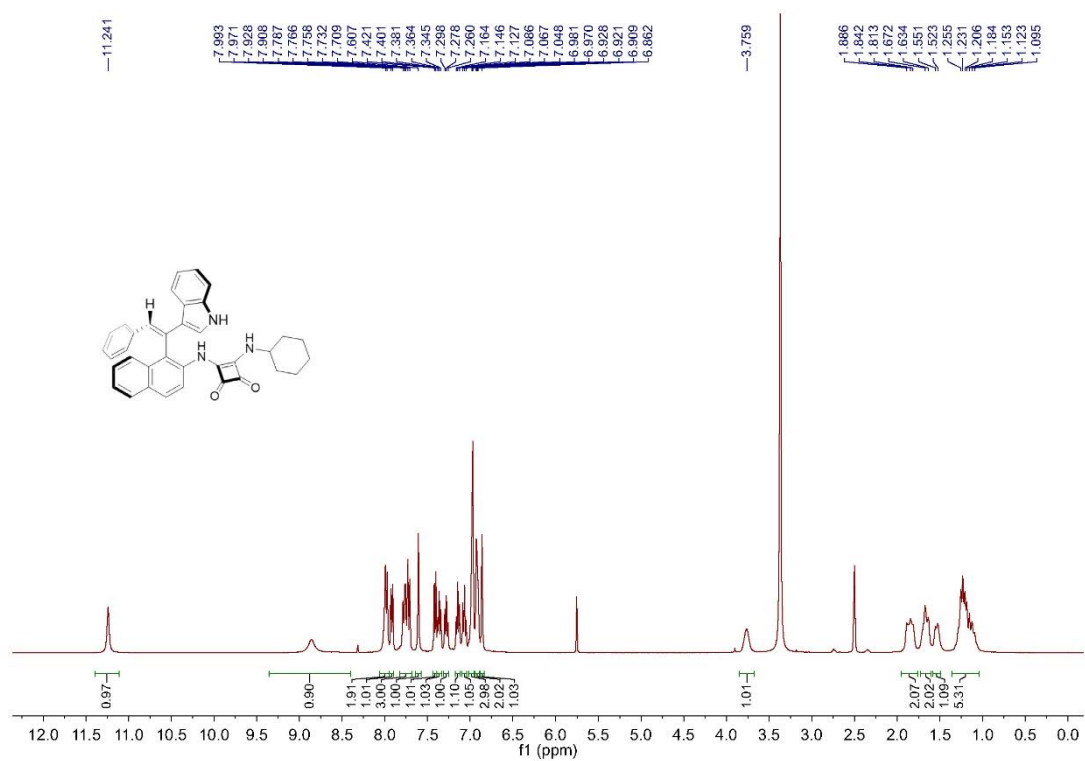

<sup>13</sup>C NMR spectrum of Cat. I in DMSO, 101 MHz

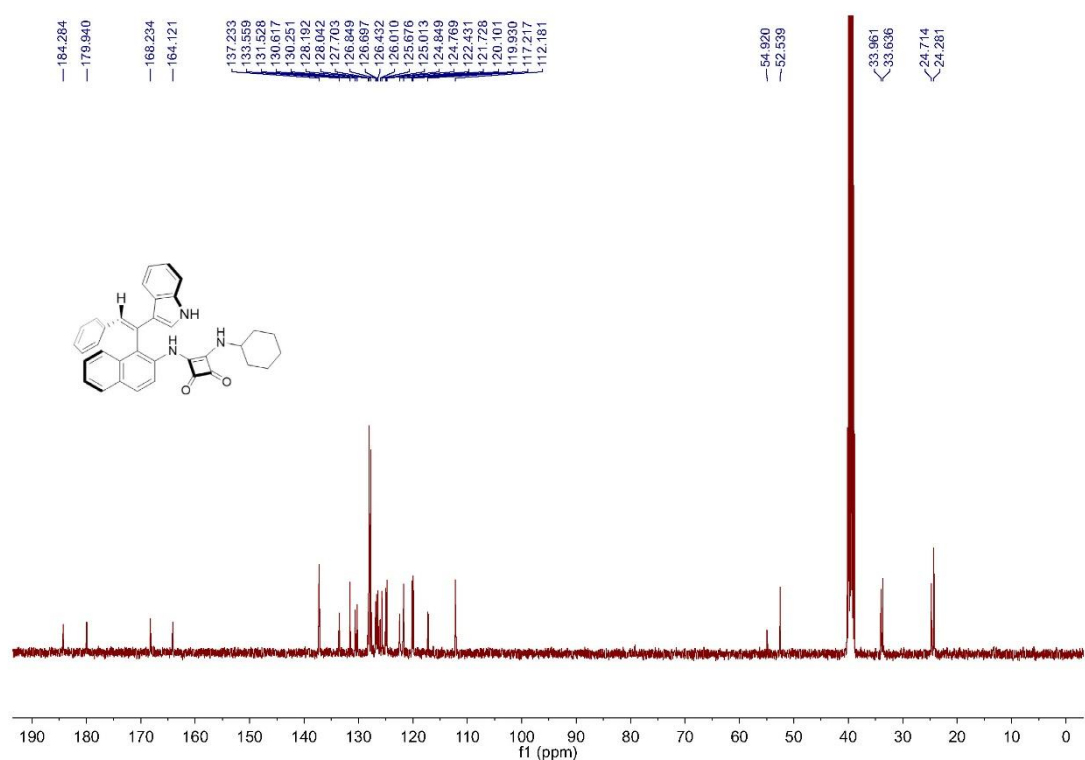

<sup>1</sup>H NMR spectrum of Cat. II in DMSO, 400 MHz

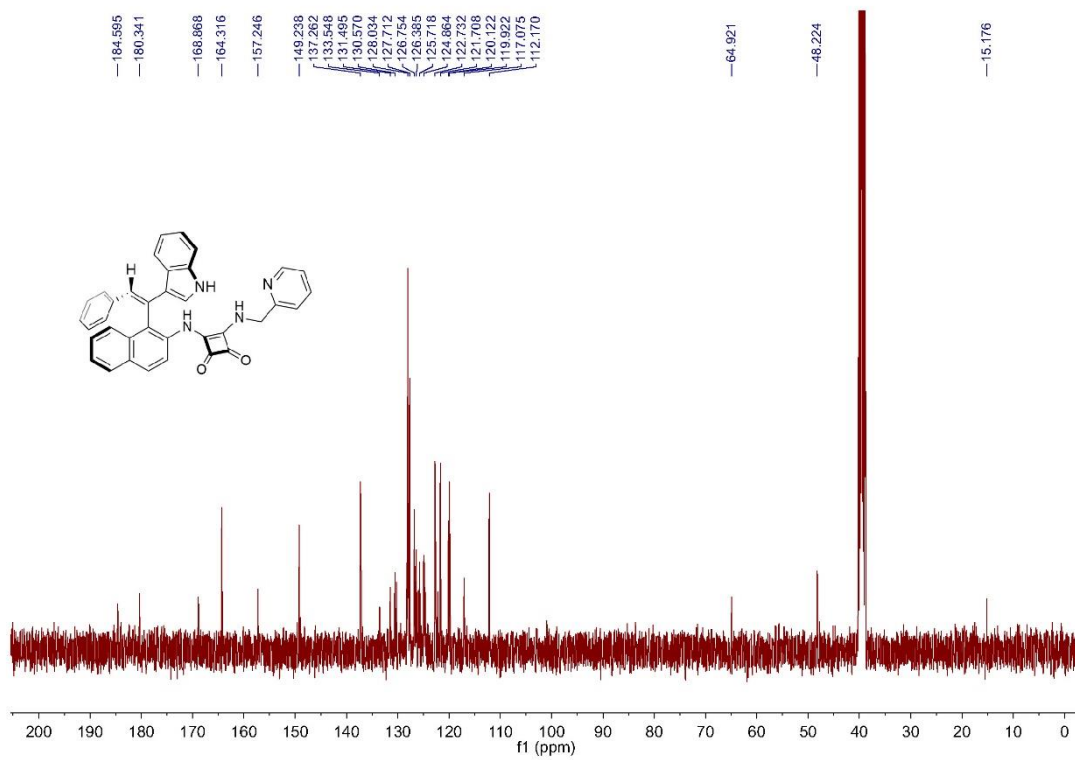

<sup>13</sup>C NMR spectrum of Cat. II in DMSO, 101 MHz

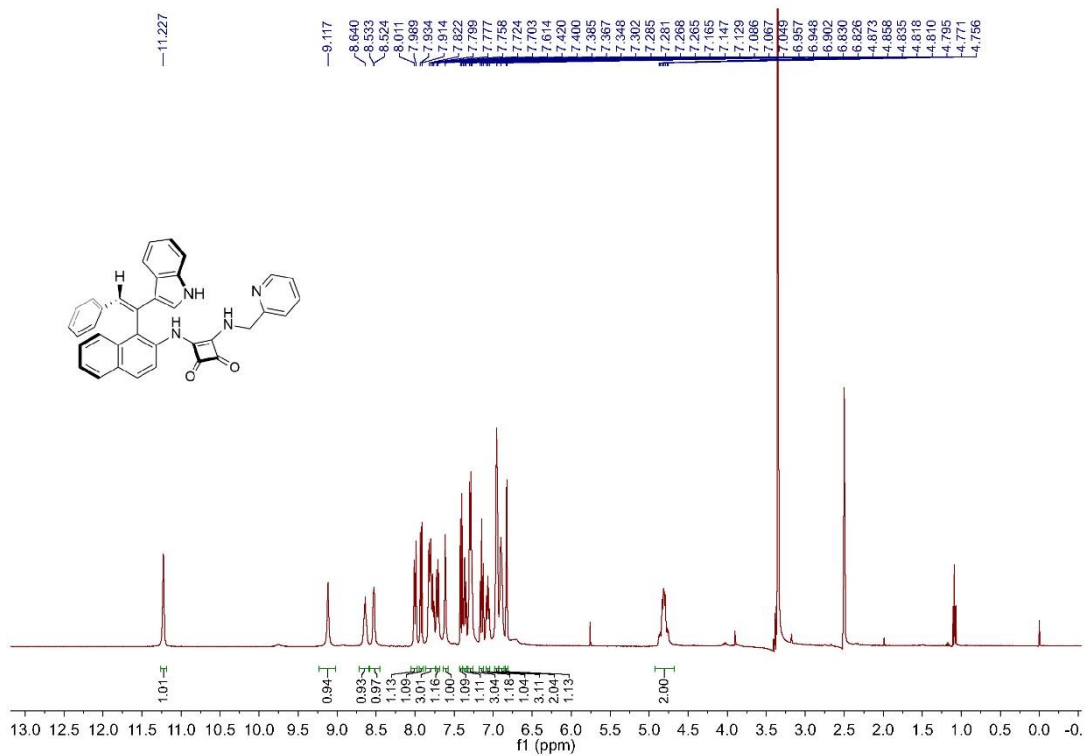

**<sup>1</sup>H NMR spectrum of Cat. III in DMSO, 400 MHz**

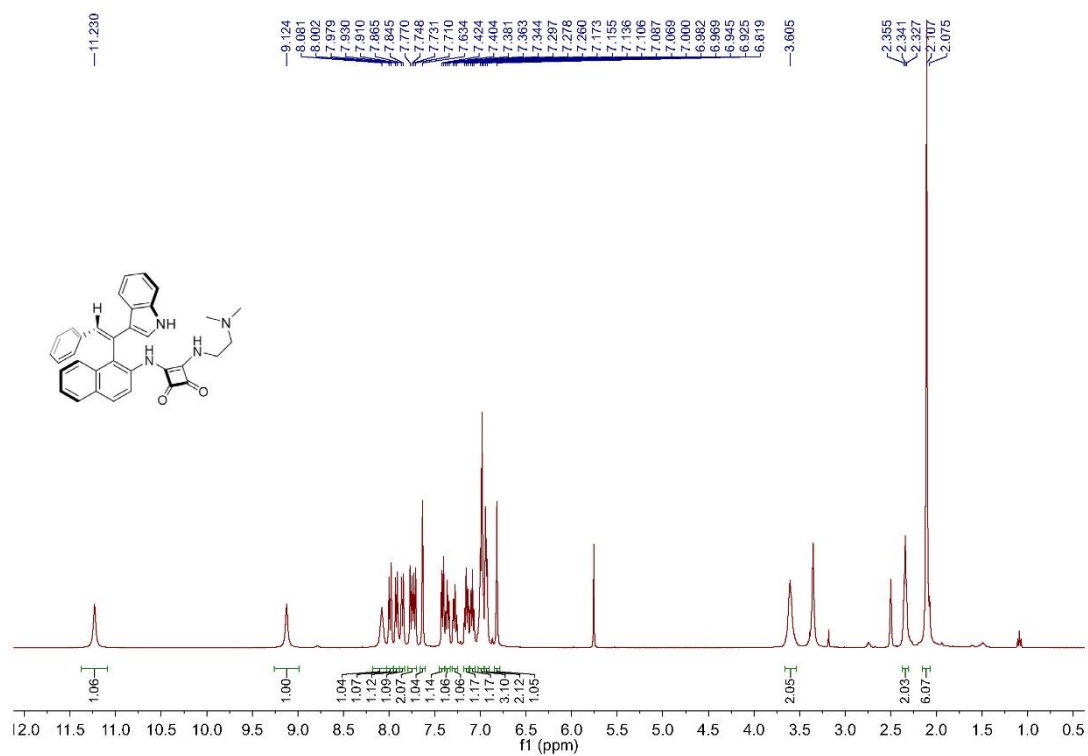

**<sup>13</sup>C NMR spectrum of Cat. III in DMSO, 101 MHz**

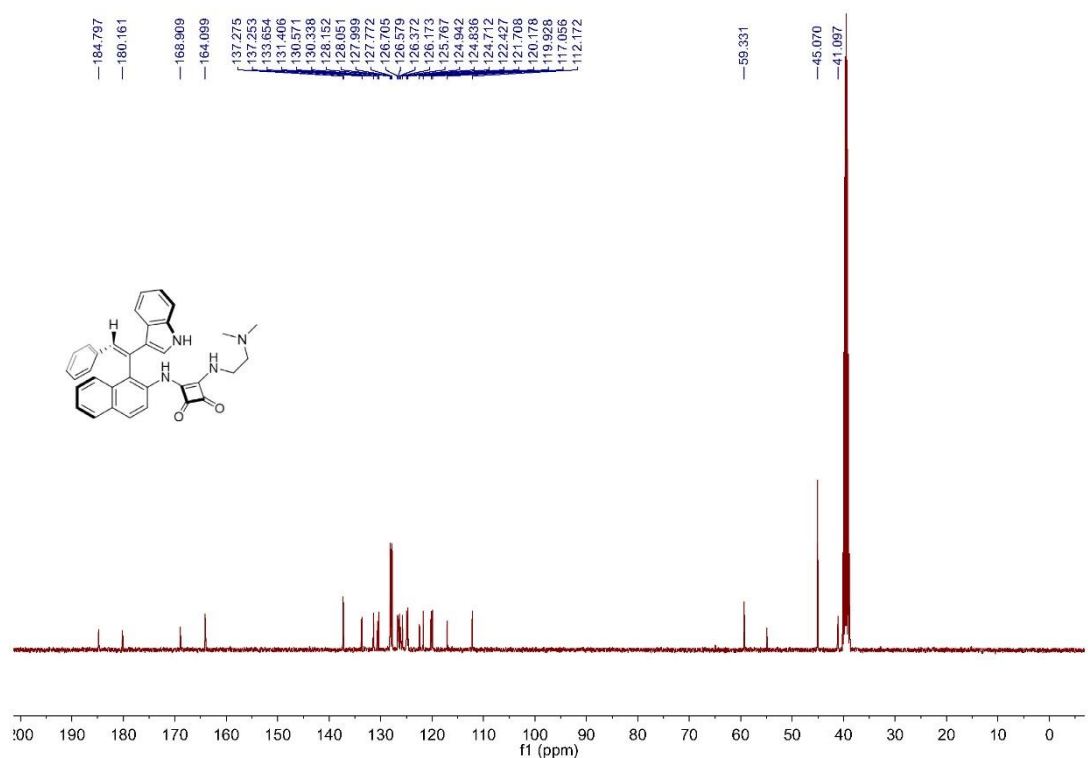

<sup>1</sup>H NMR spectrum of Cat. IV in DMSO, 400 MHz

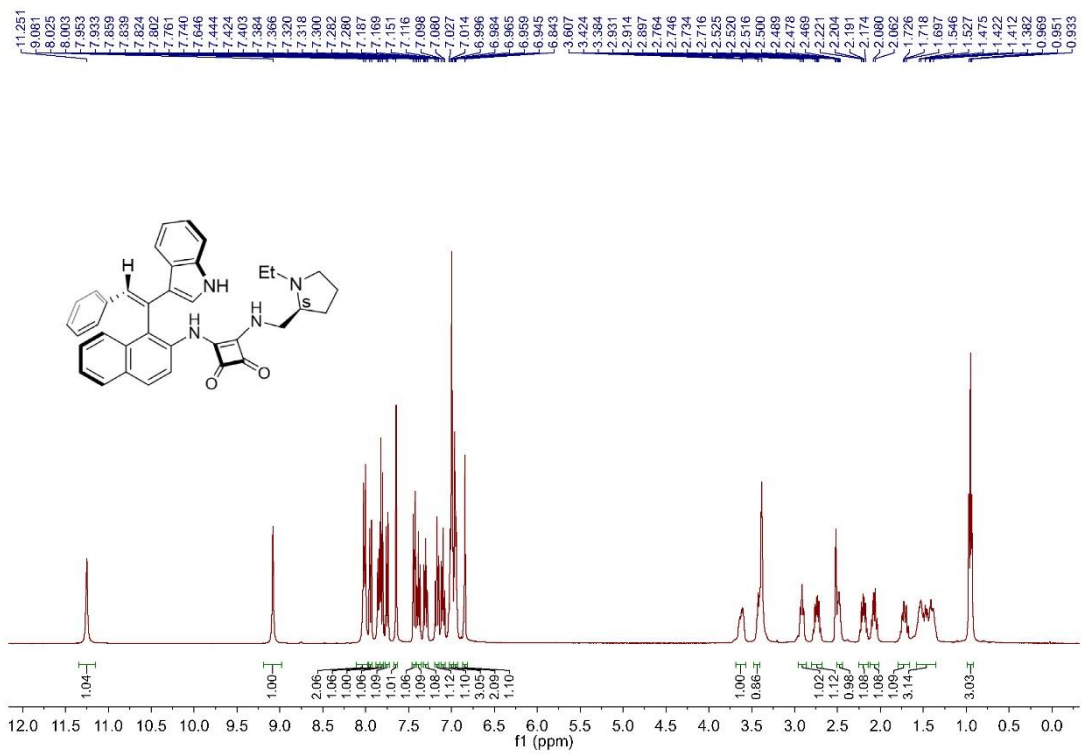

<sup>13</sup>C NMR spectrum of Cat. IV in DMSO, 101 MHz

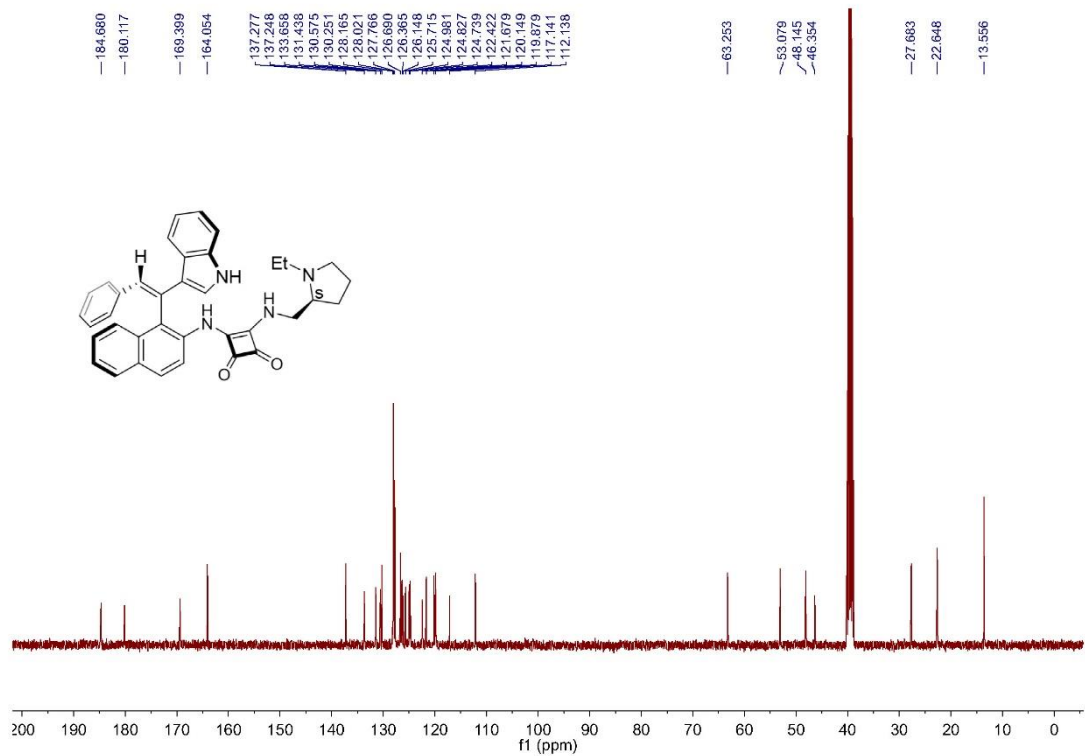

<sup>1</sup>H NMR spectrum of Cat. V in DMSO, 400 MHz

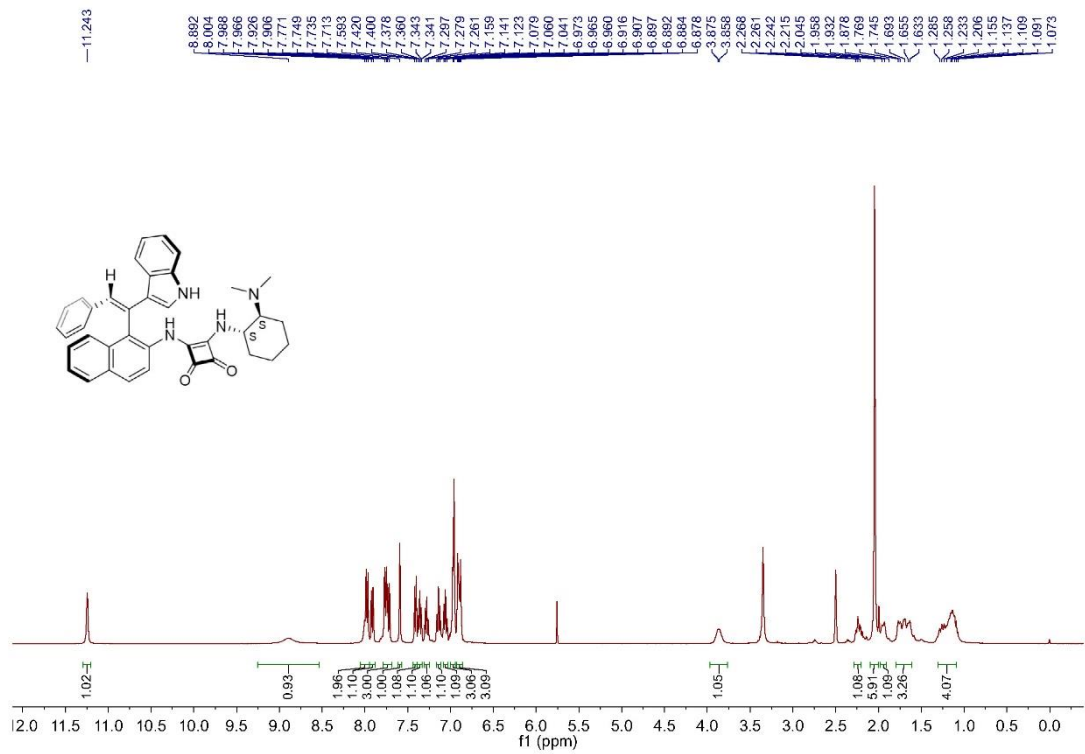

<sup>13</sup>C NMR spectrum of Cat. V in DMSO, 101 MHz

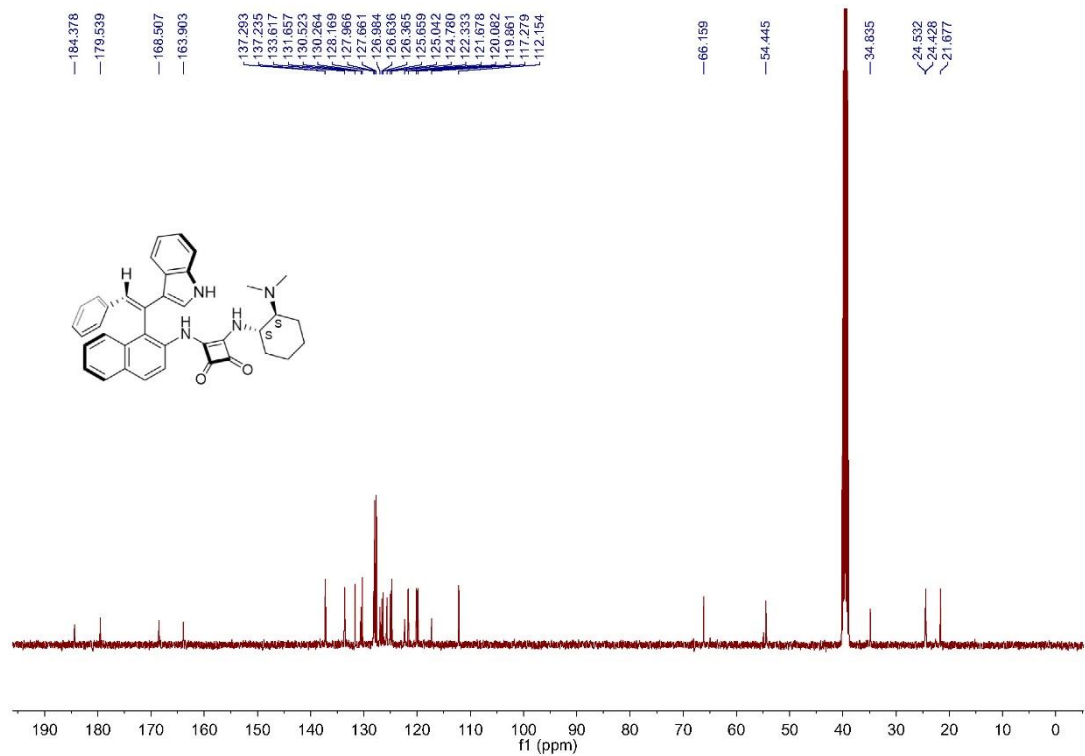

<sup>1</sup>H NMR spectrum of Cat. VI in DMSO, 400 MHz

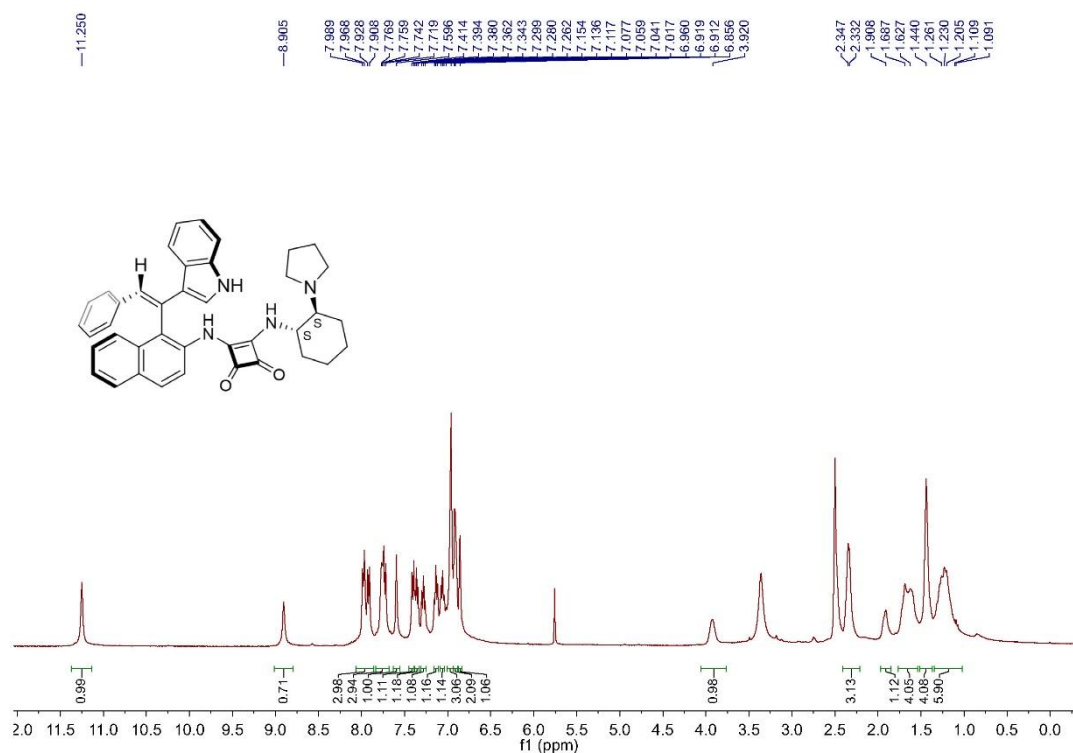

<sup>13</sup>C NMR spectrum of Cat. VI in DMSO, 101 MHz

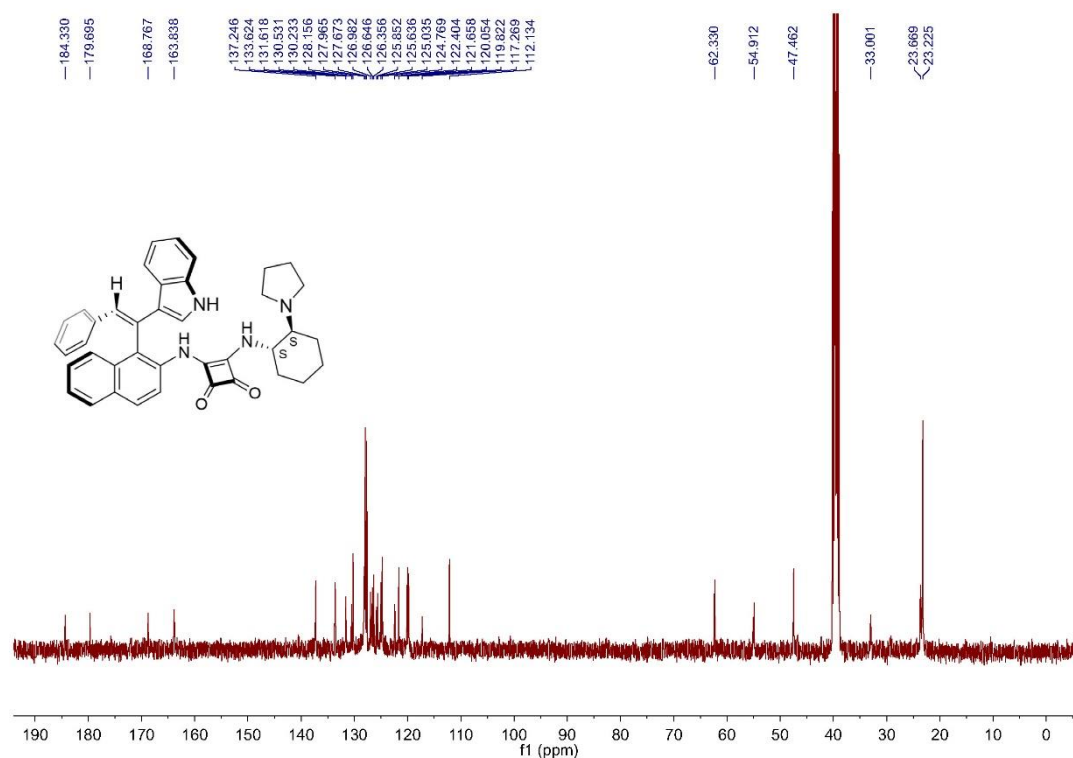

<sup>1</sup>H NMR spectrum of Cat. VII in DMSO, 400 MHz

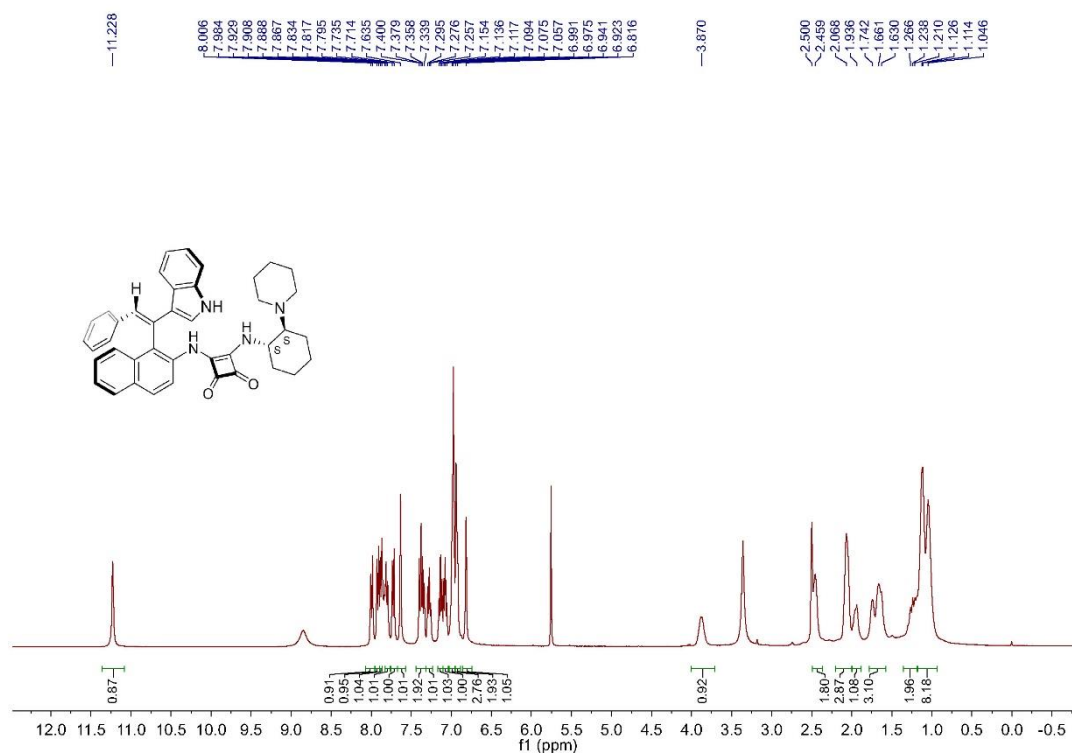

<sup>13</sup>C NMR spectrum of Cat. VII in DMSO, 101 MHz

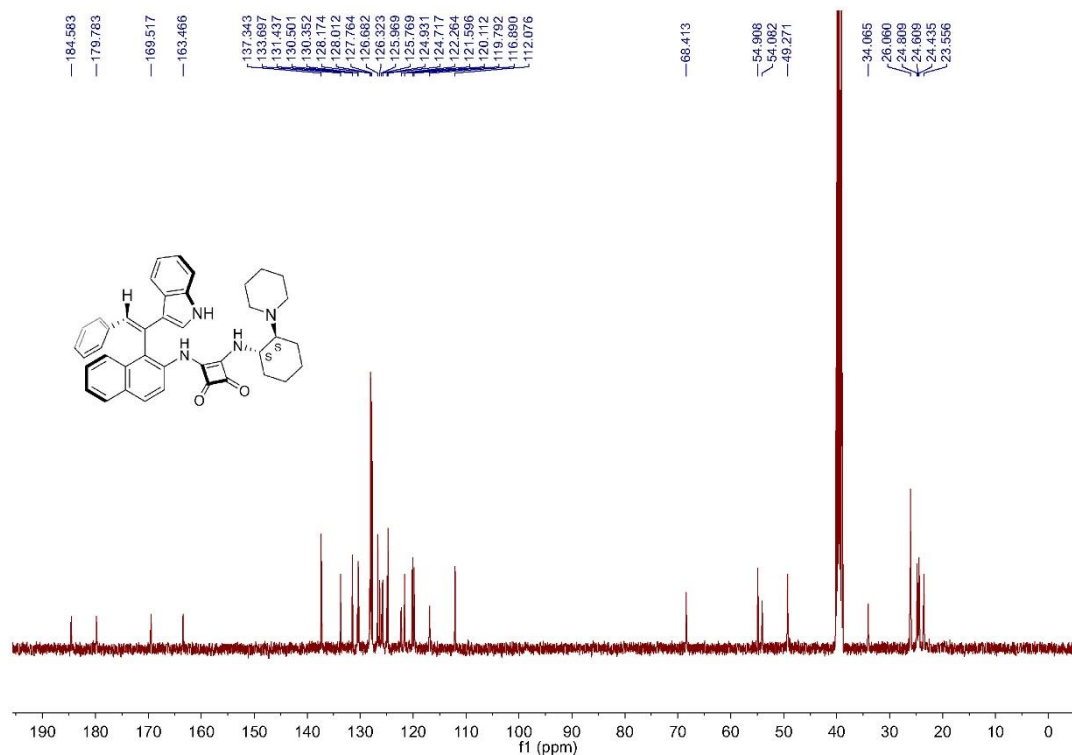



<sup>1</sup>H NMR spectrum of Cat. VIII in DMSO, 400 MHz

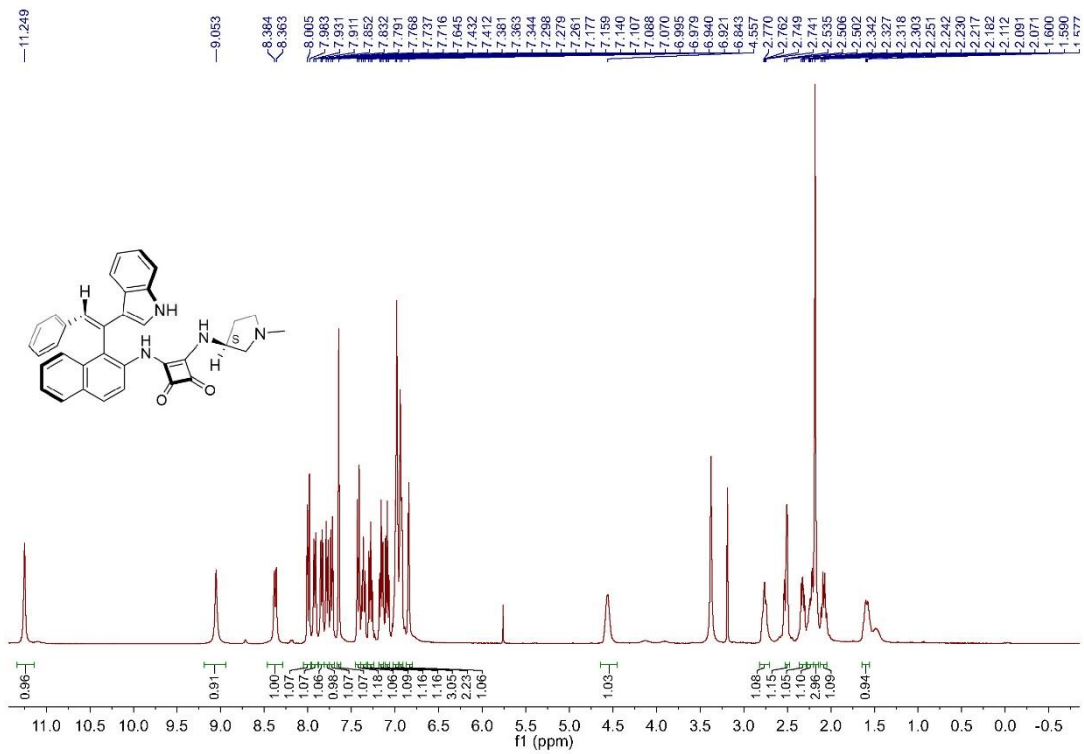

<sup>13</sup>C NMR spectrum of Cat. VIII in DMSO, 101 MHz

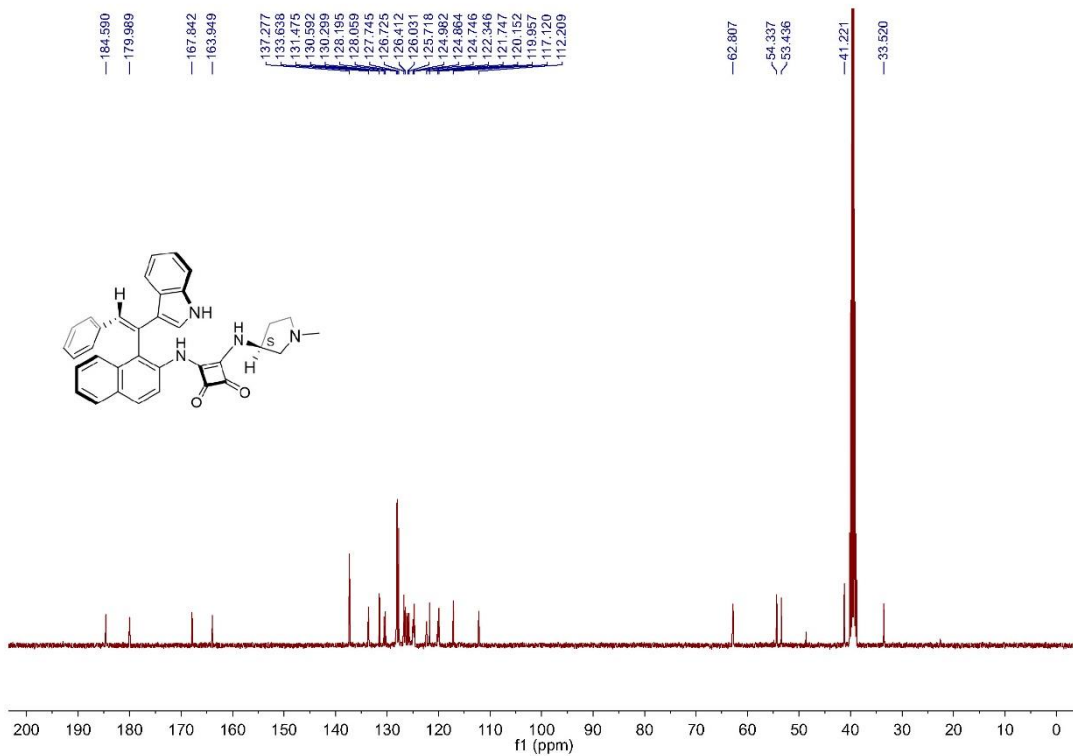

<sup>1</sup>H NMR spectrum of Cat. IX in DMSO, 400 MHz

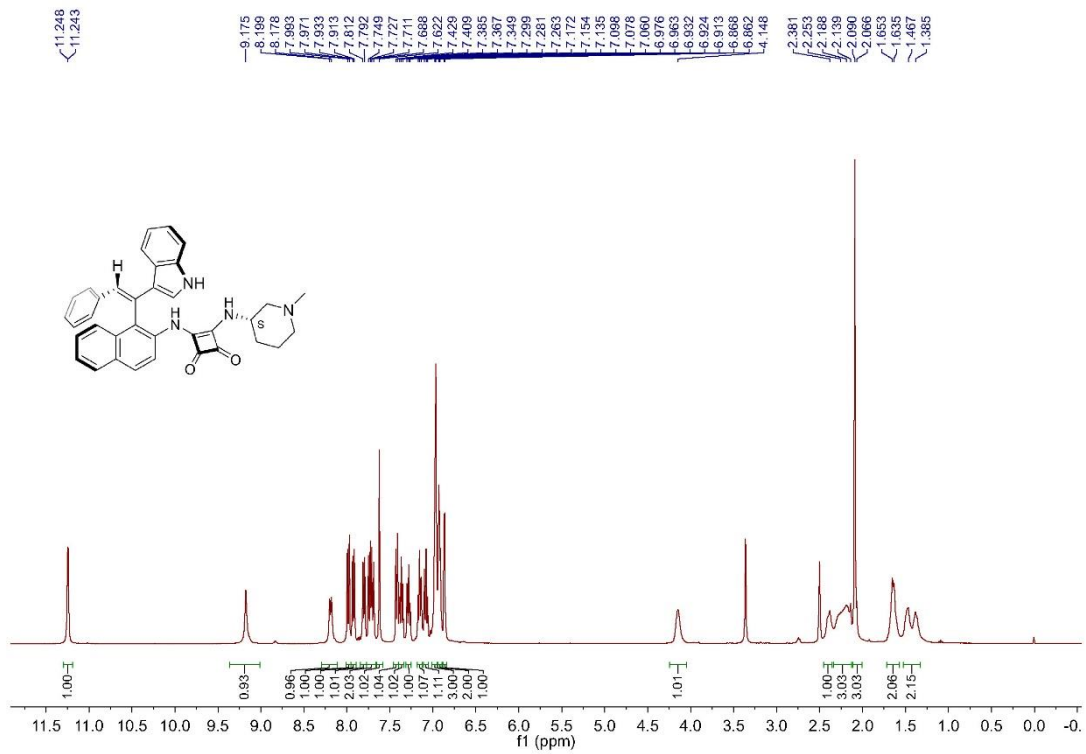

<sup>13</sup>C NMR spectrum of Cat. IX in DMSO, 101 MHz

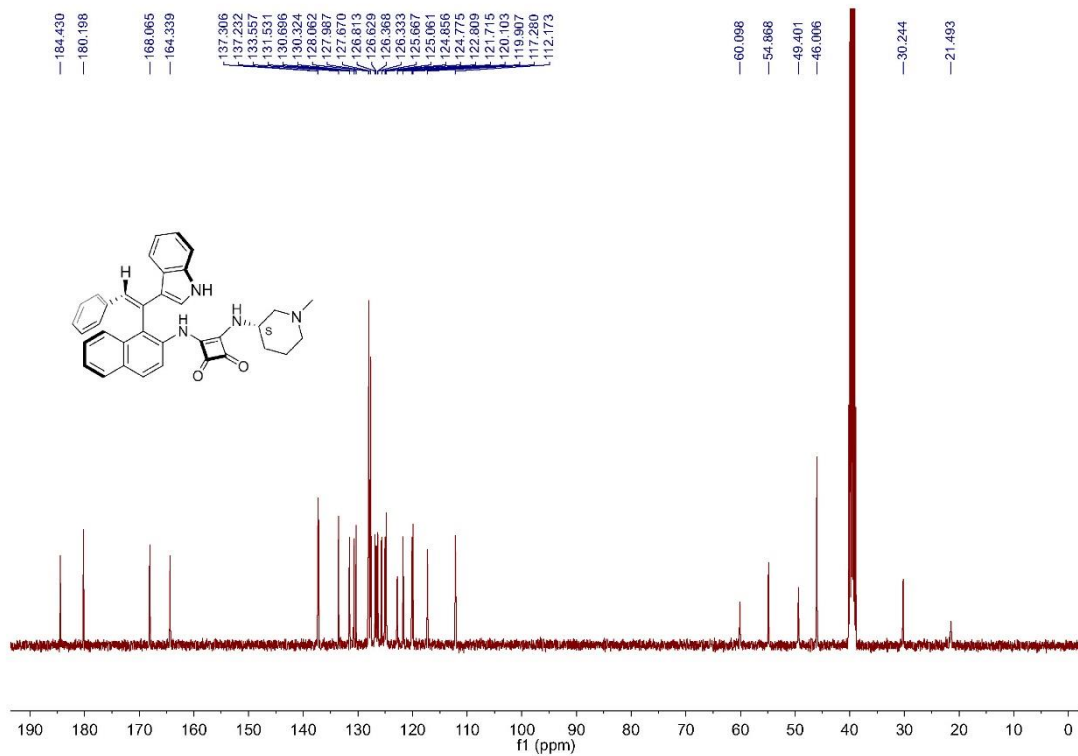

### <sup>1</sup>H NMR spectrum of Cat. X in DMSO, 400 MHz

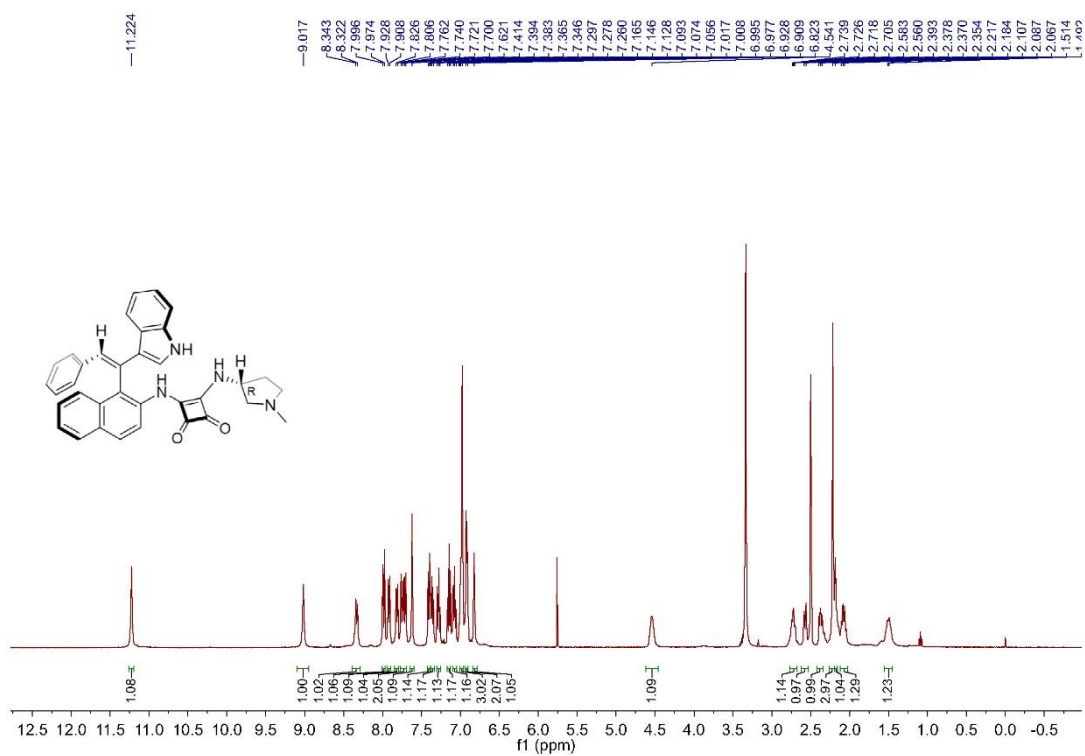

### <sup>13</sup>C NMR spectrum of Cat. X in DMSO, 101 MHz

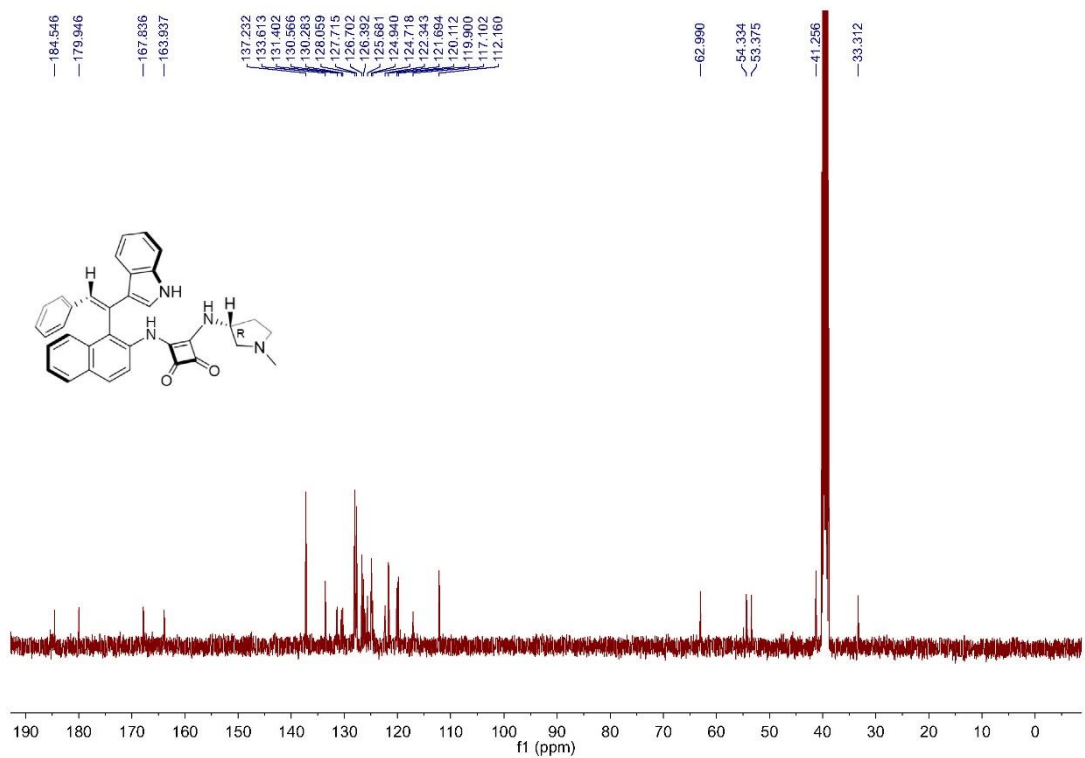

<sup>1</sup>H NMR spectrum of Cat. XI in CDCl<sub>3</sub>, 400 MHz

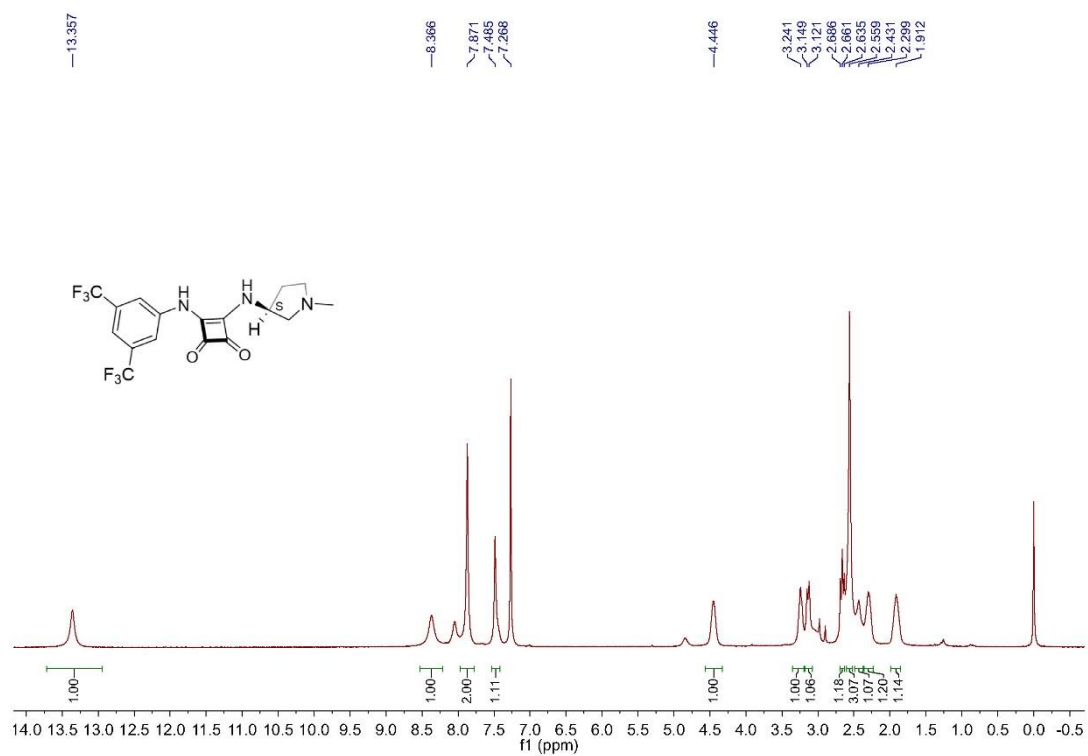

<sup>13</sup>C NMR spectrum of Cat. XI in CDCl<sub>3</sub>, 101 MHz

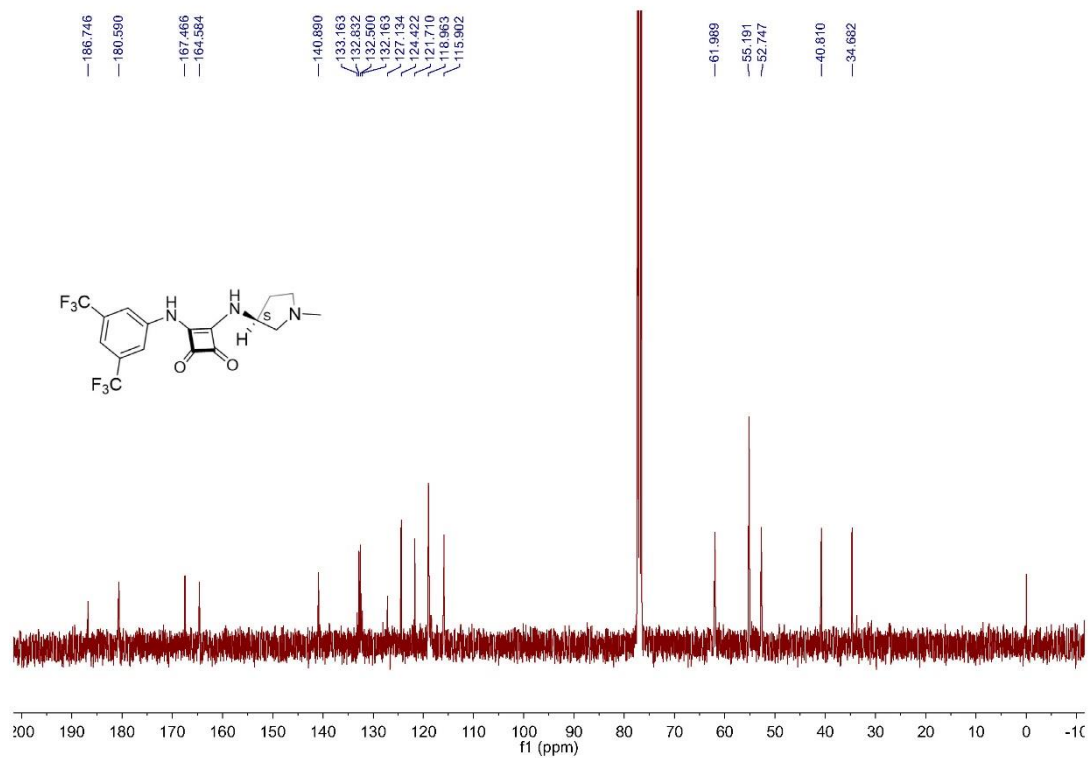

<sup>1</sup>H NMR spectrum of **3aa** in CDCl<sub>3</sub>, 400 MHz

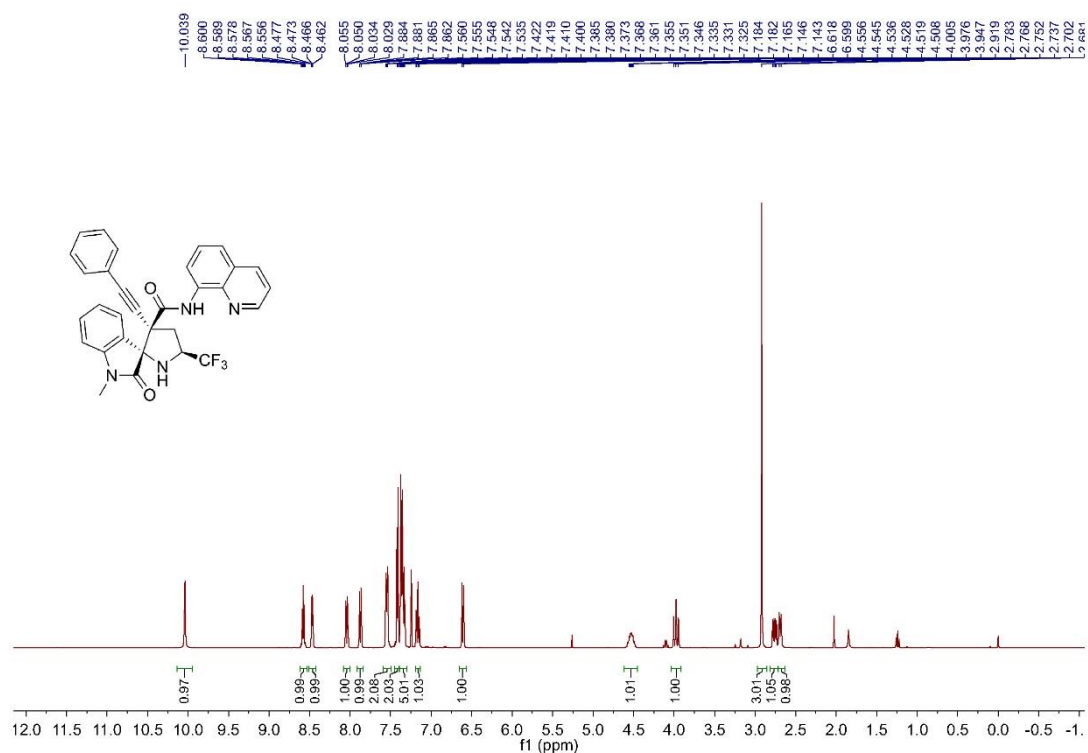

<sup>13</sup>C NMR spectrum of **3aa** in CDCl<sub>3</sub>, 101 MHz

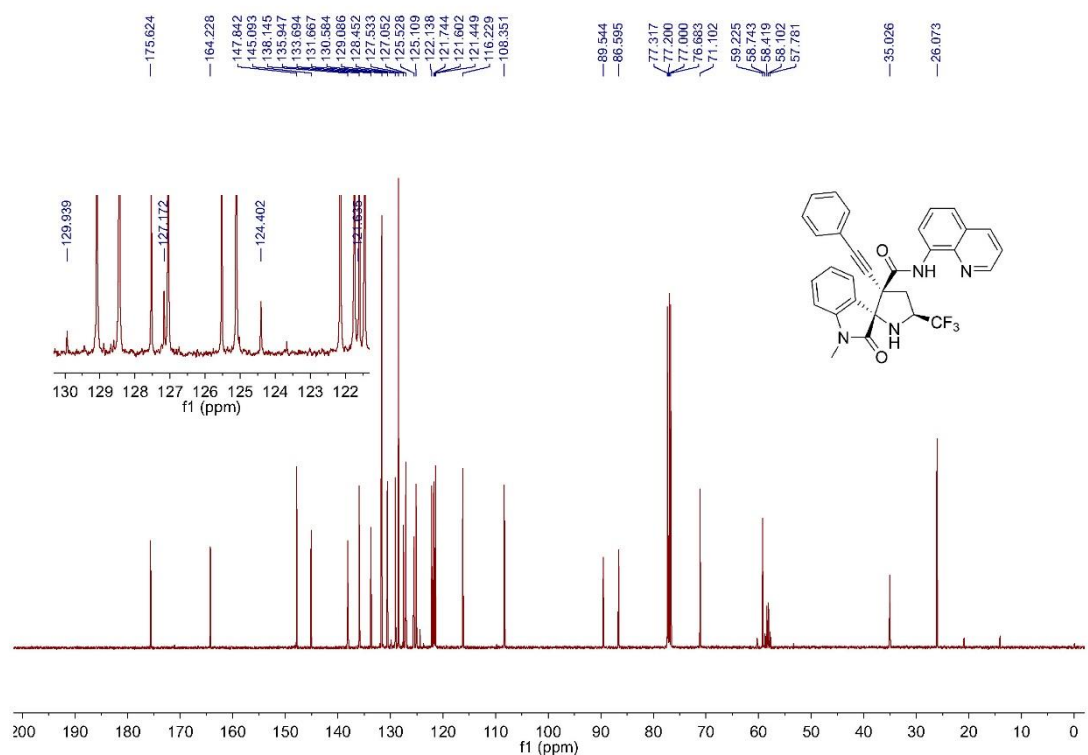

<sup>19</sup>F NMR spectrum of **3aa** in CDCl<sub>3</sub>, 376 MHz

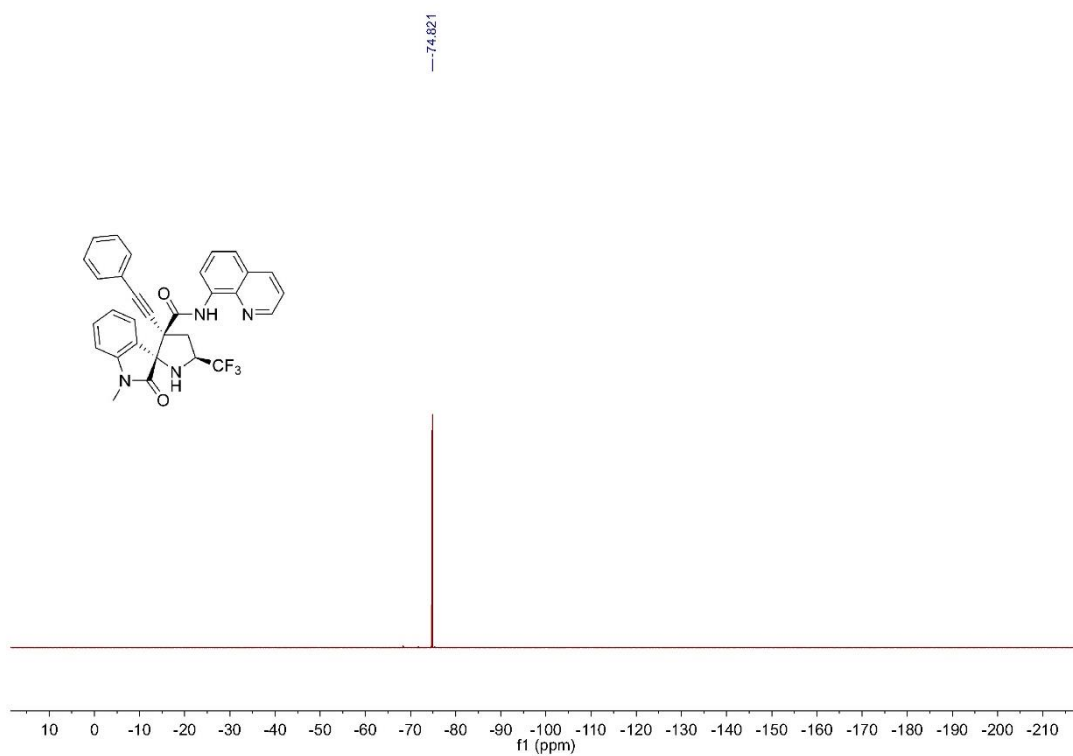

<sup>1</sup>H NMR spectrum of **3ba** in CDCl<sub>3</sub>, 400 MHz

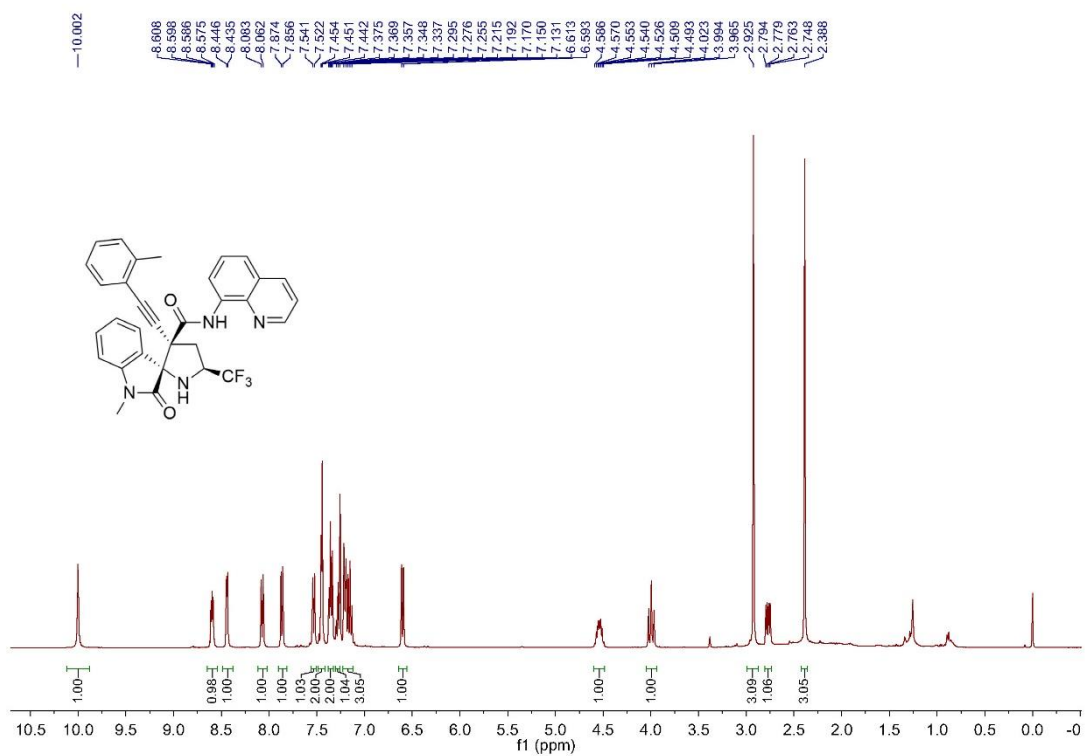

<sup>13</sup>C NMR spectrum of **3ba** in CDCl<sub>3</sub>, 101 MHz

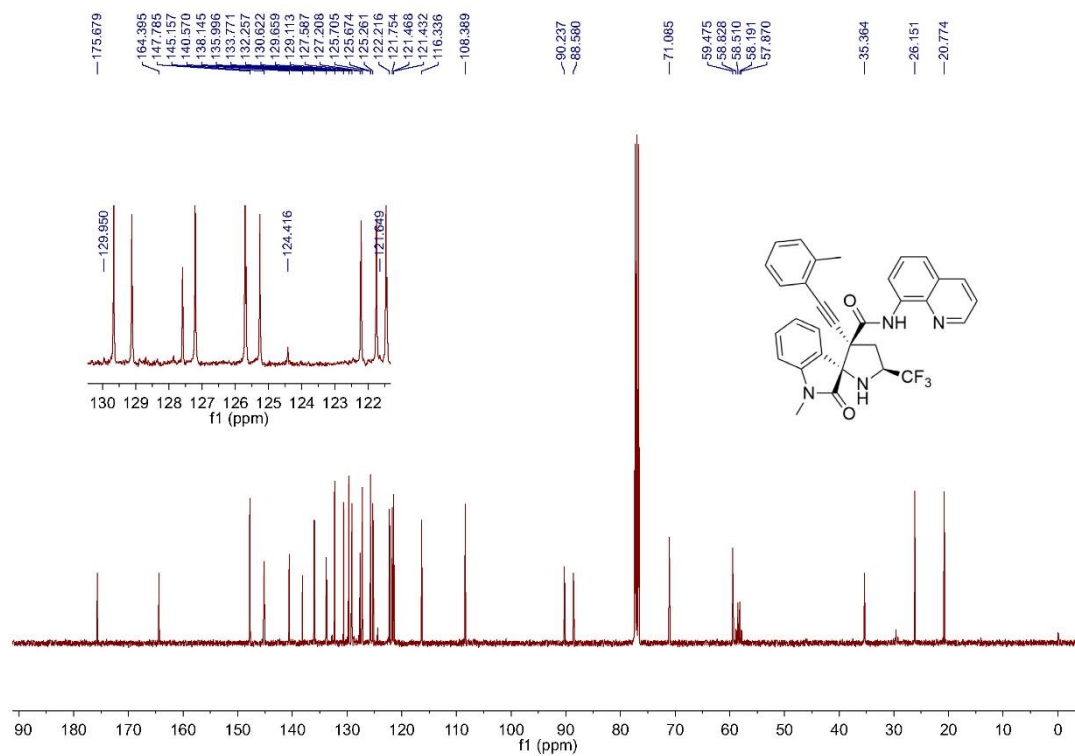

<sup>19</sup>F NMR spectrum of **3ba** in CDCl<sub>3</sub>, 376 MHz

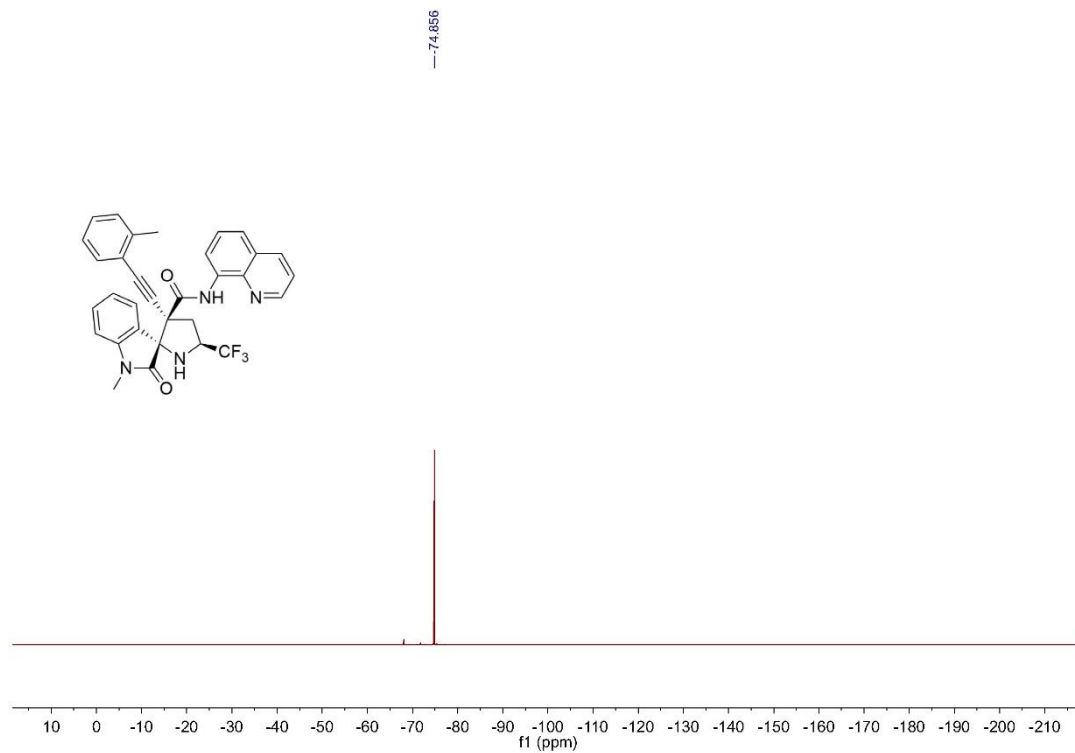

<sup>1</sup>H NMR spectrum of **3ca** in CDCl<sub>3</sub>, 400 MHz

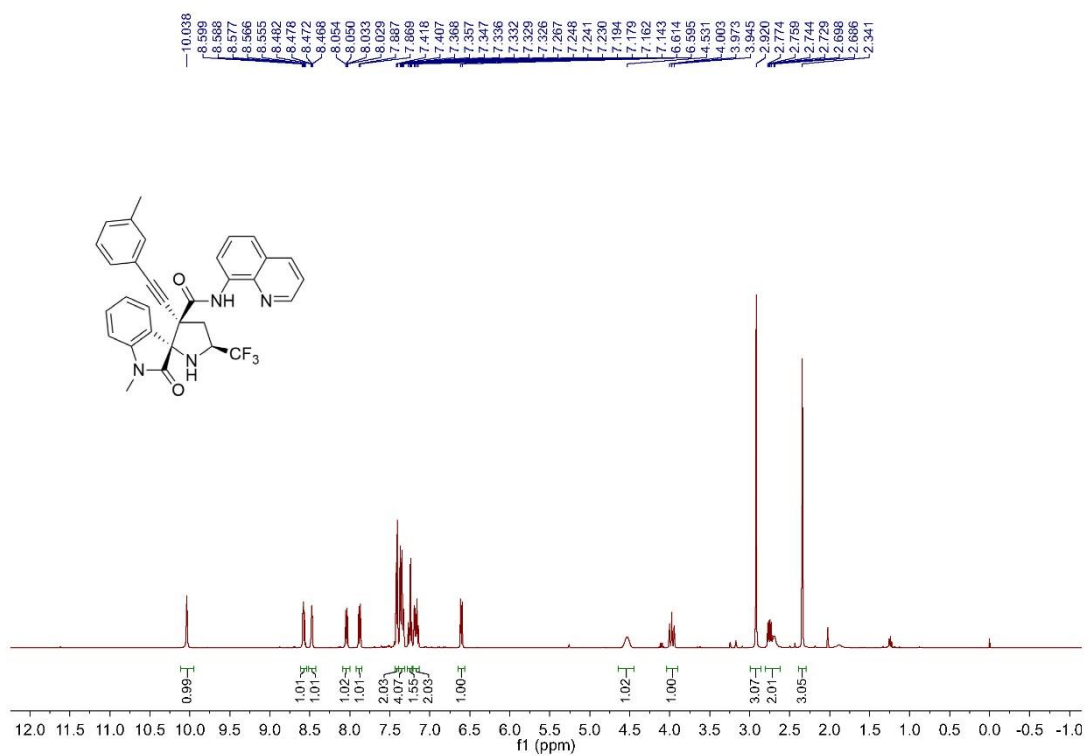

<sup>13</sup>C NMR spectrum of **3ca** in CDCl<sub>3</sub>, 101 MHz

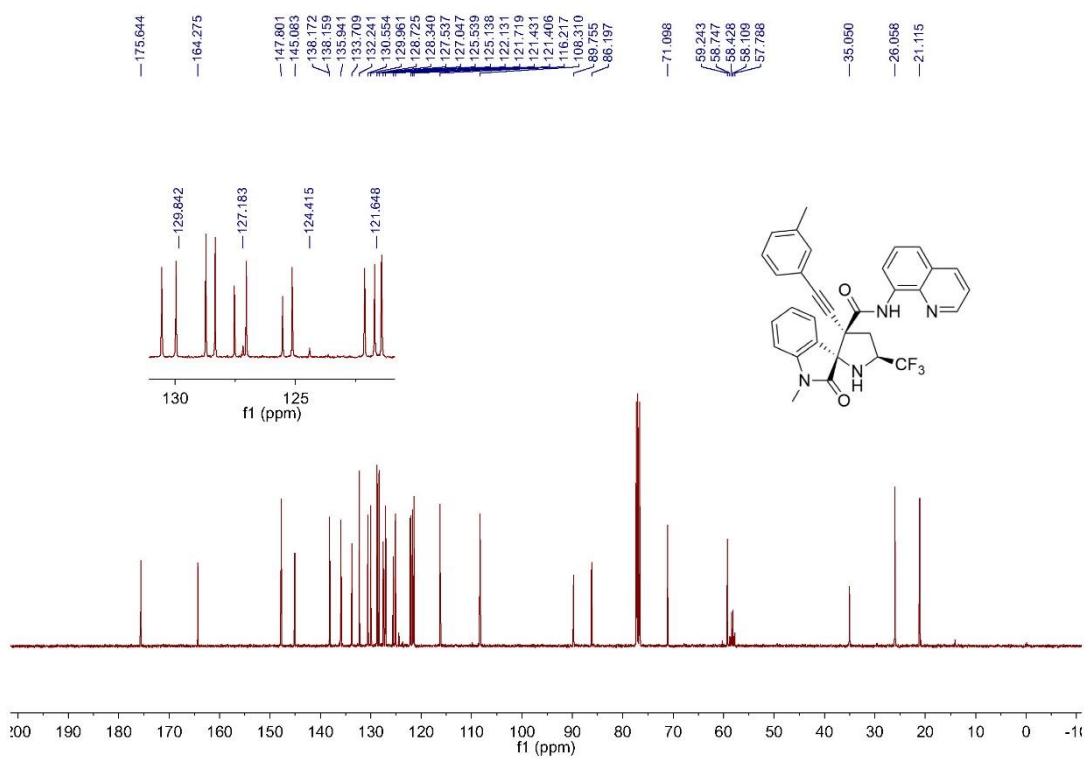



<sup>19</sup>F NMR spectrum of **3ca** in CDCl<sub>3</sub>, 376 MHz

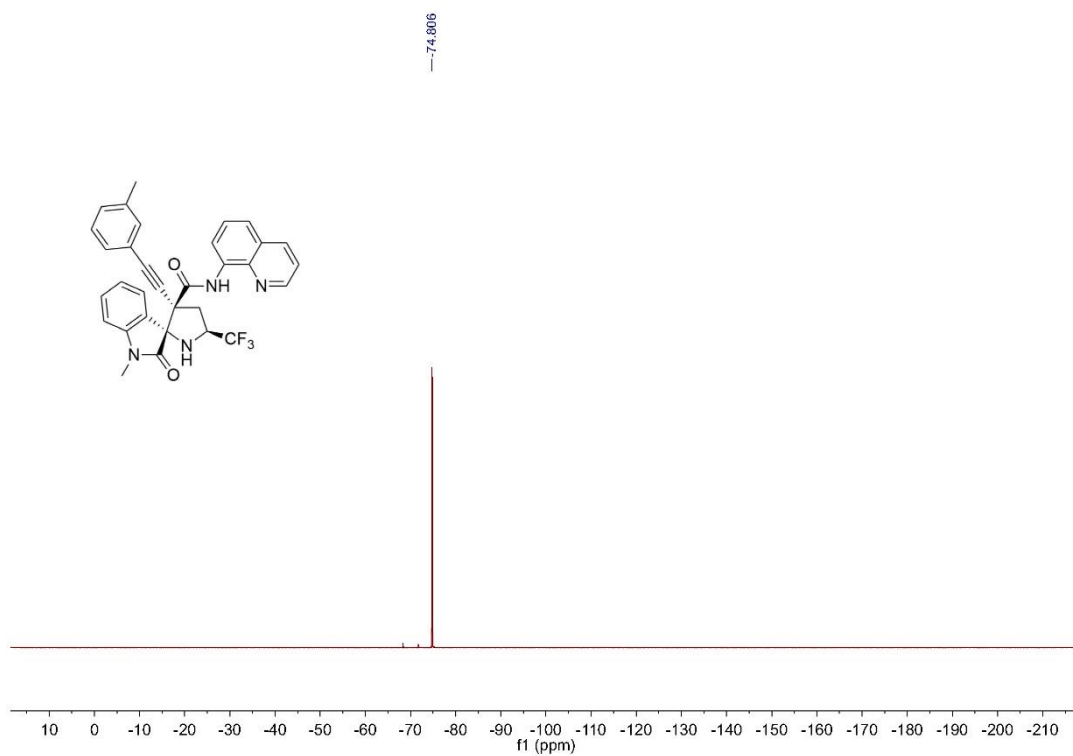

<sup>1</sup>H NMR spectrum of **3da** in CDCl<sub>3</sub>, 400 MHz

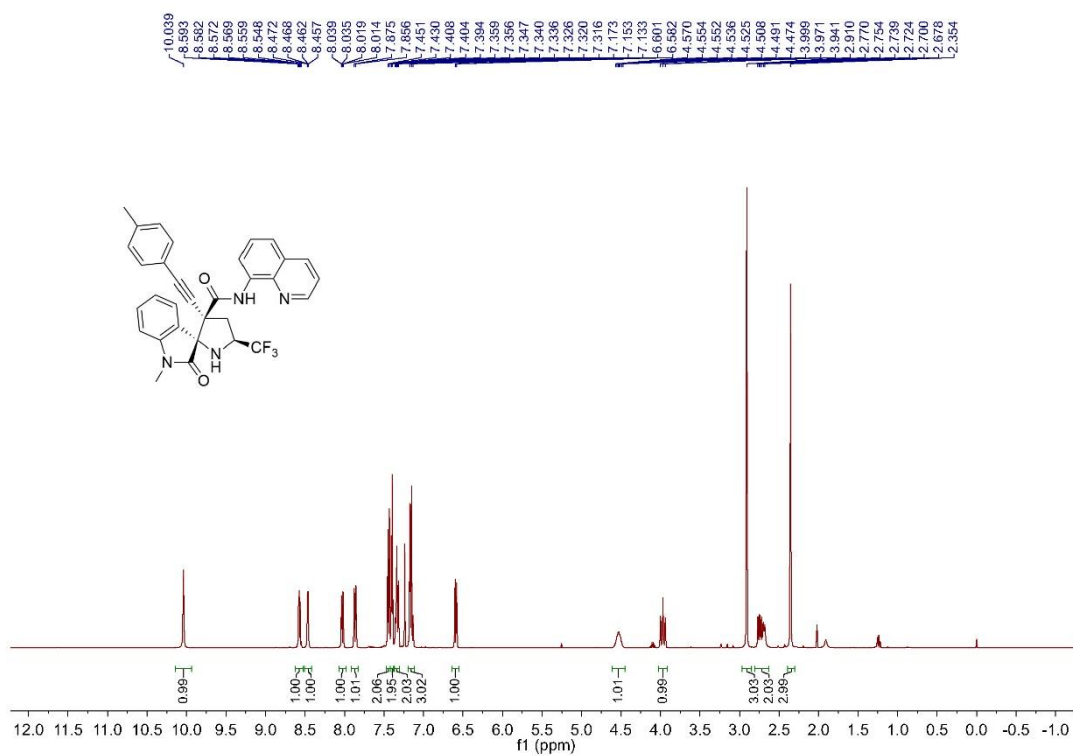

<sup>13</sup>C NMR spectrum of **3da** in CDCl<sub>3</sub>, 101 MHz

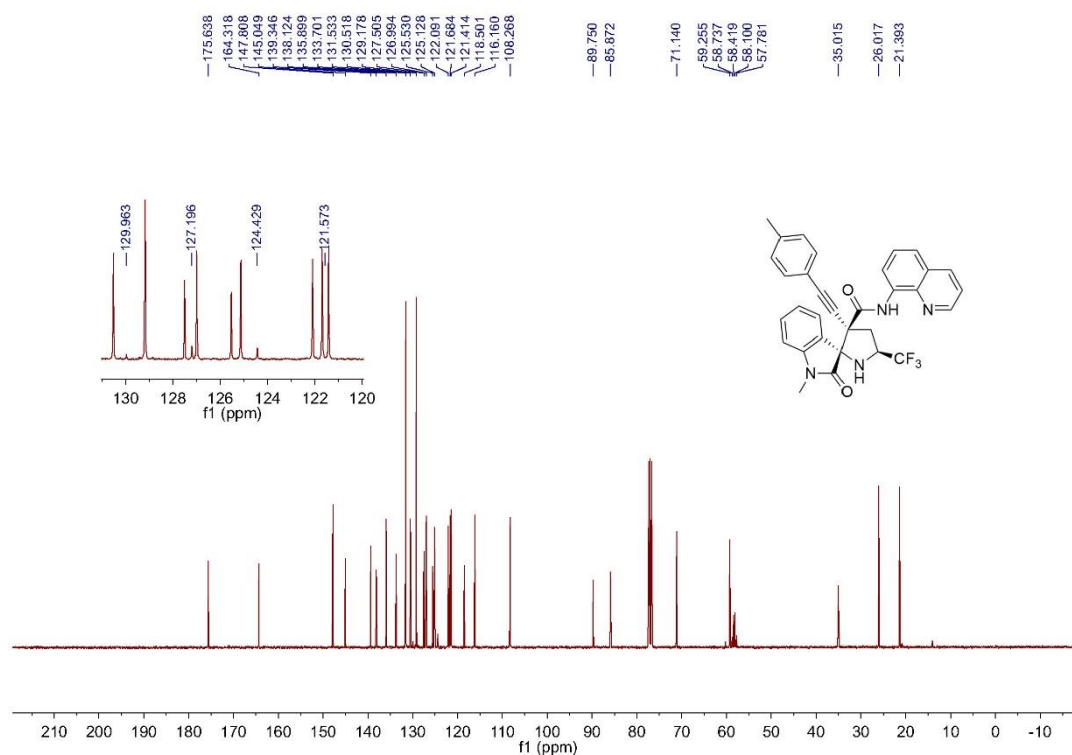

<sup>19</sup>F NMR spectrum of **3da** in CDCl<sub>3</sub>, 376 MHz

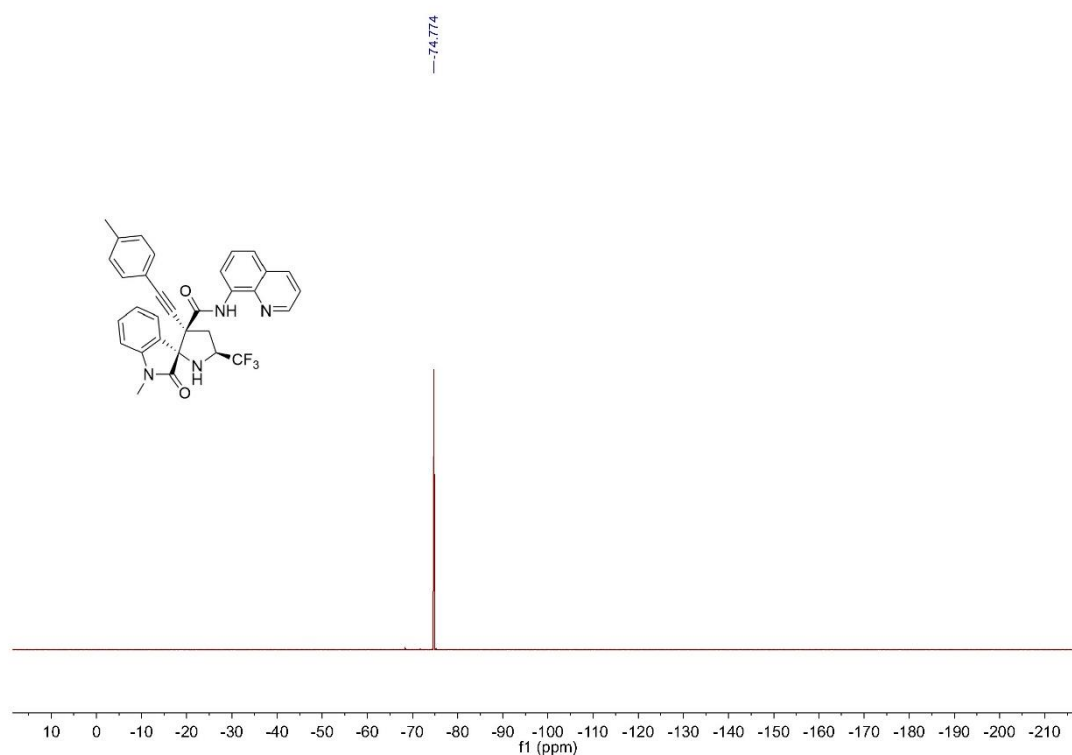

<sup>1</sup>H NMR spectrum of **3ea** in CDCl<sub>3</sub>, 400 MHz

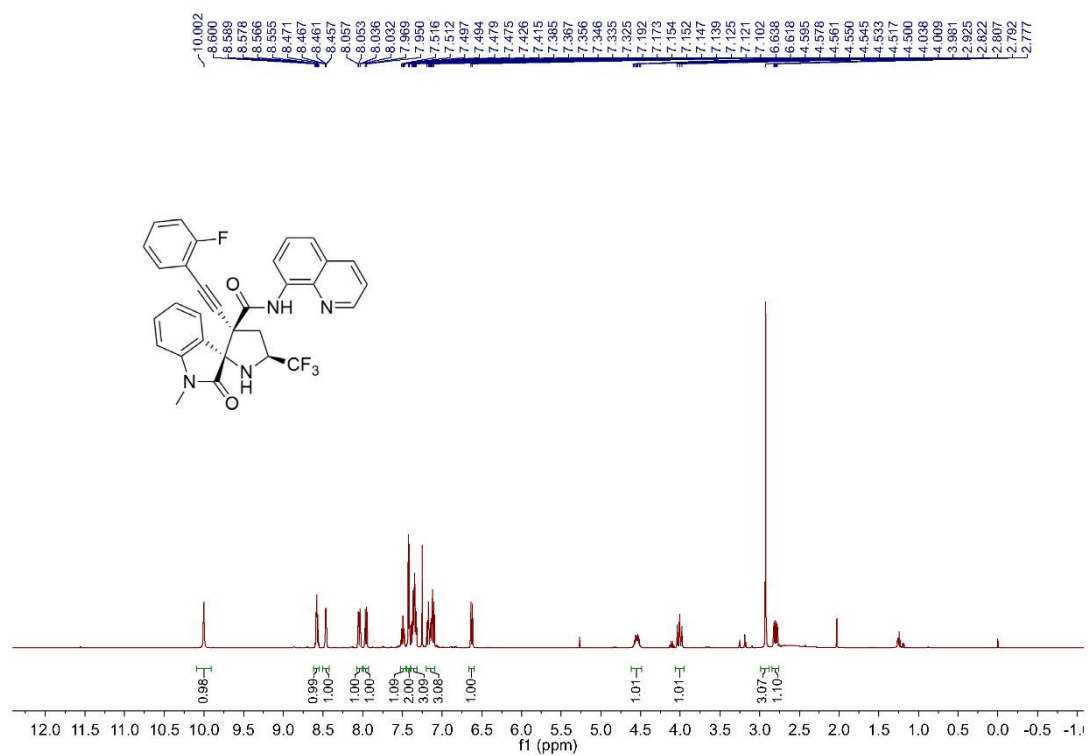

<sup>13</sup>C NMR spectrum of **3ea** in CDCl<sub>3</sub>, 101 MHz

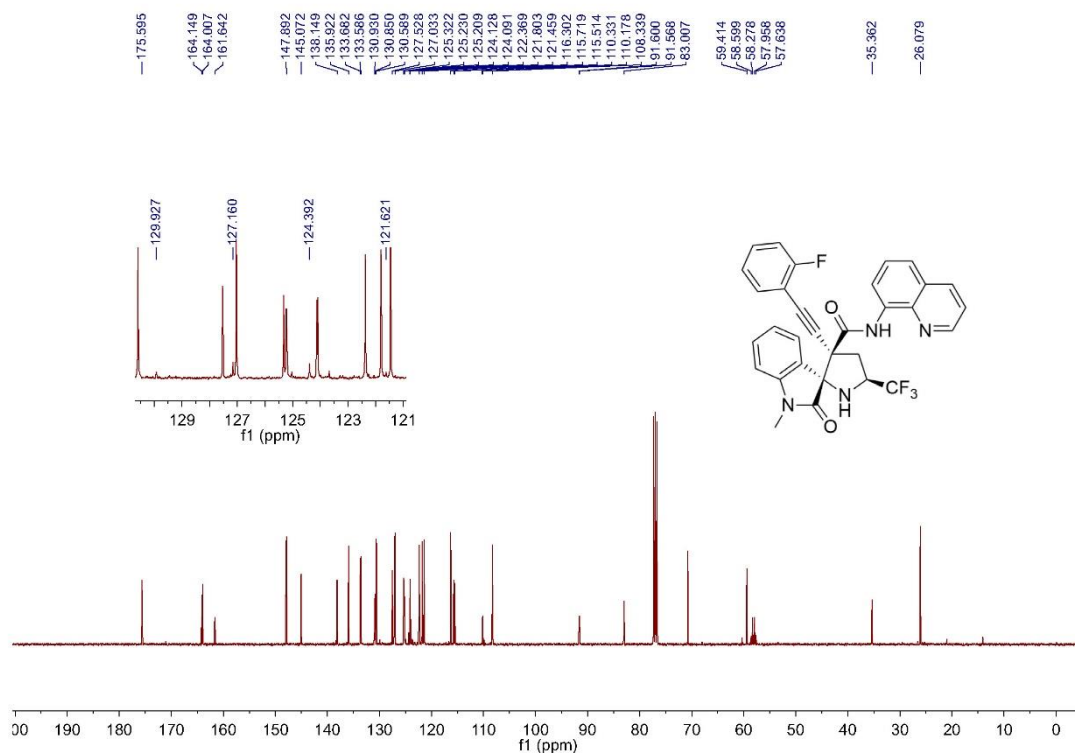

<sup>19</sup>F NMR spectrum of **3ea** in CDCl<sub>3</sub>, 376 MHz

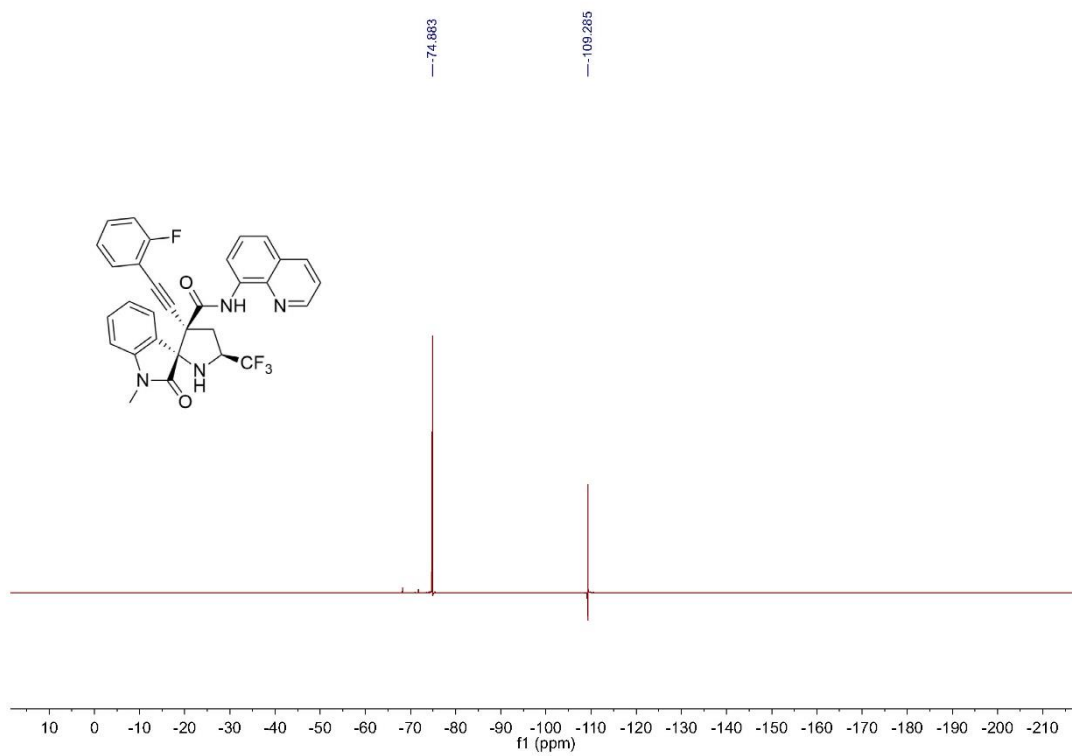

<sup>1</sup>H NMR spectrum of **3fa** in CDCl<sub>3</sub>, 400 MHz

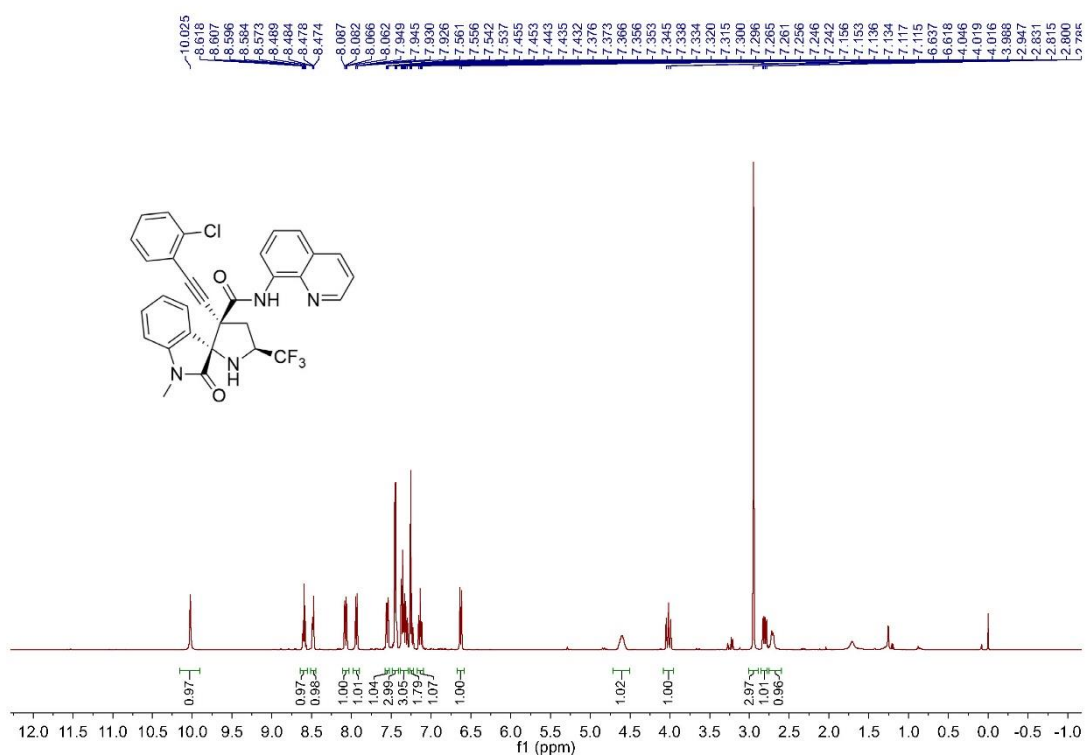

<sup>13</sup>C NMR spectrum of **3fa** in CDCl<sub>3</sub>, 101 MHz

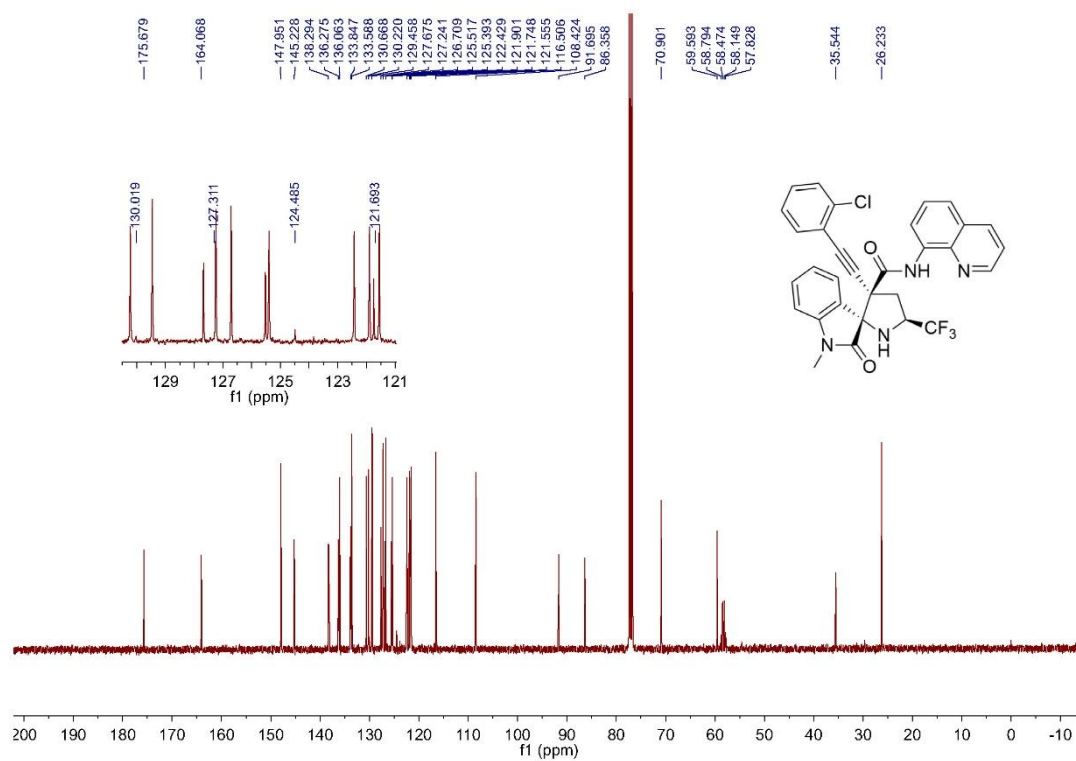

<sup>19</sup>F NMR spectrum of **3fa** in CDCl<sub>3</sub>, 376 MHz

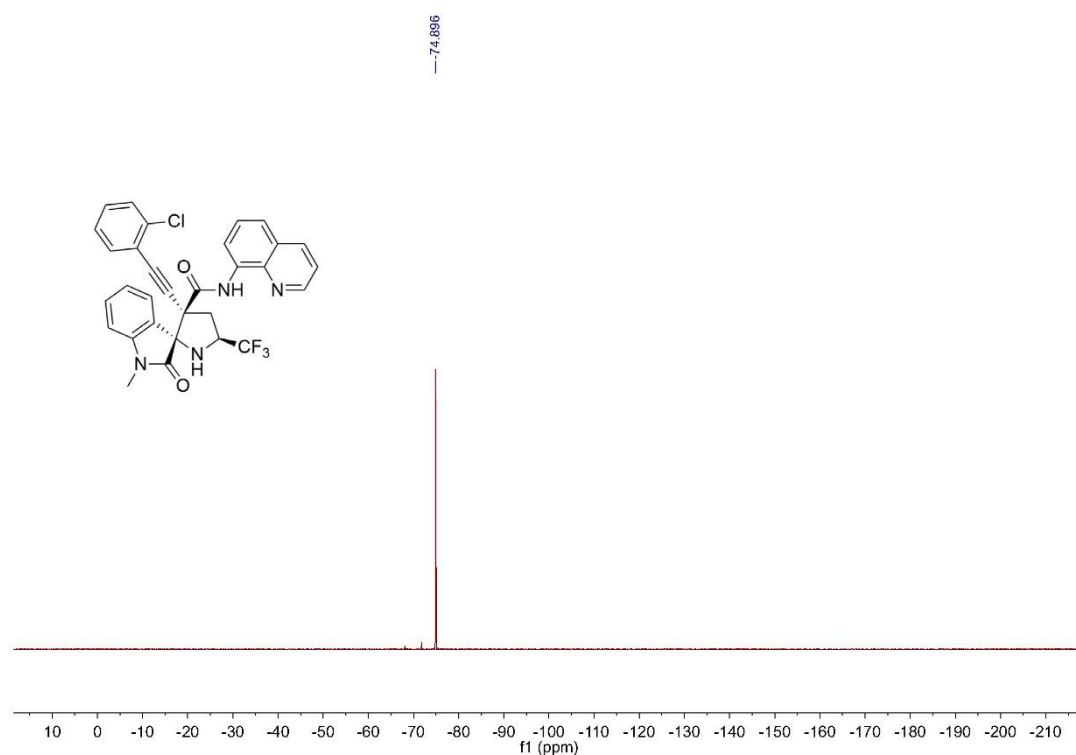

<sup>1</sup>H NMR spectrum of **3ga** in CDCl<sub>3</sub>, 400 MHz

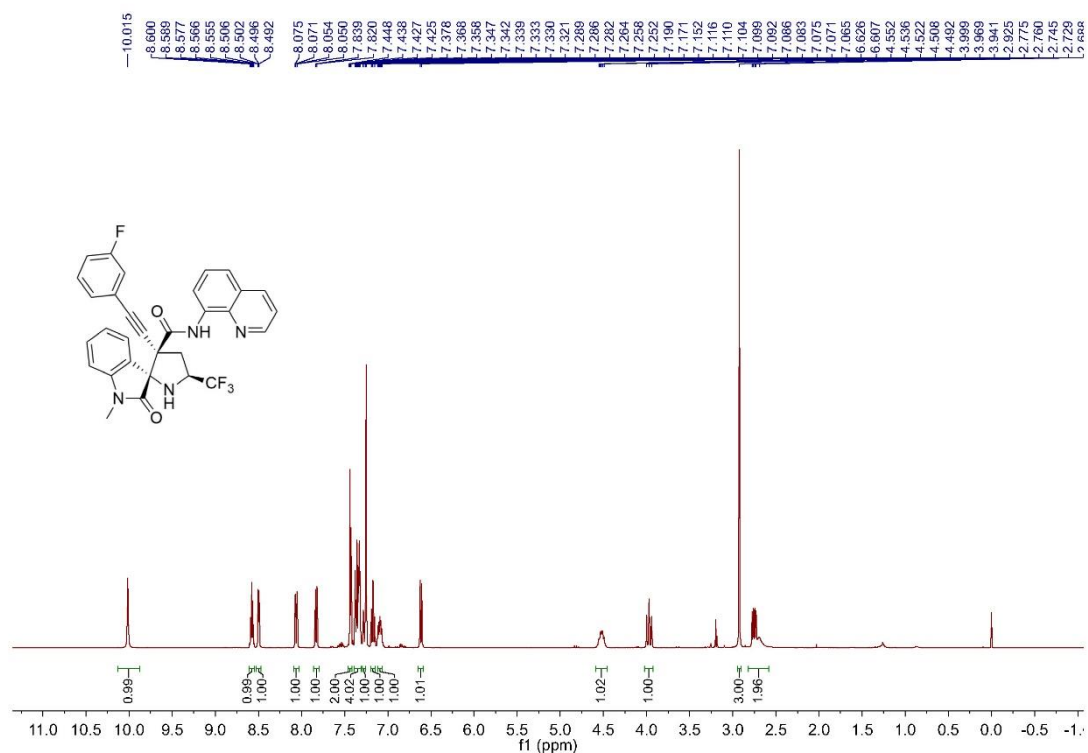

<sup>13</sup>C NMR spectrum of **3ga** in CDCl<sub>3</sub>, 101 MHz

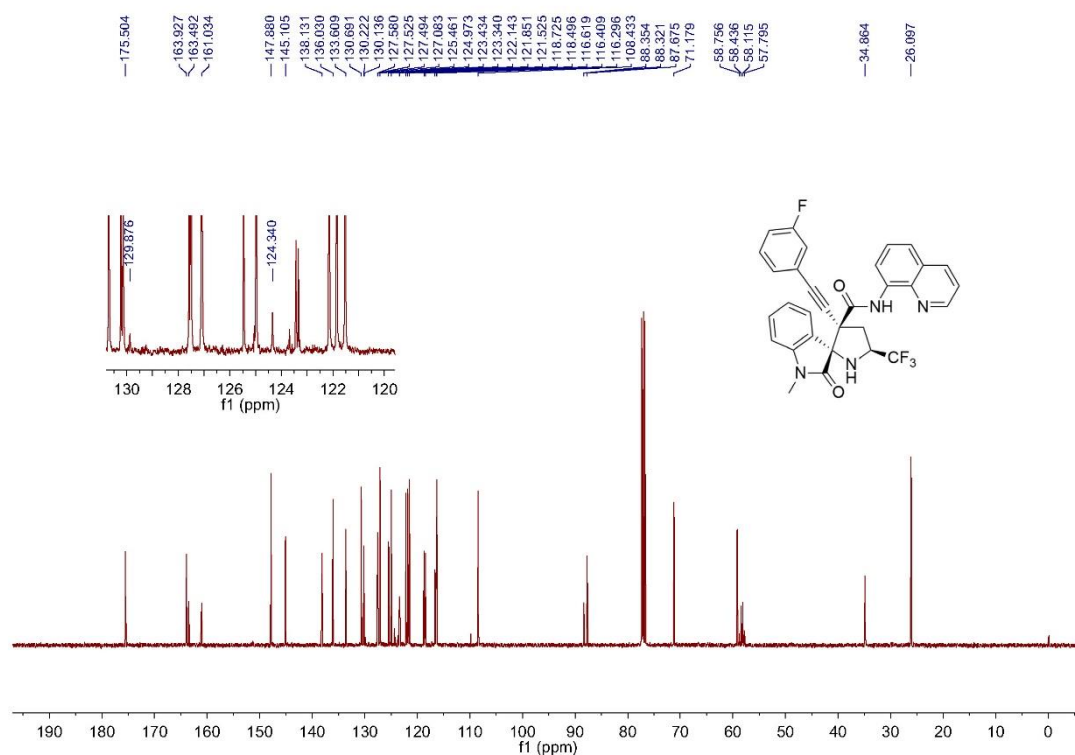

<sup>19</sup>F NMR spectrum of **3ga** in CDCl<sub>3</sub>, 376 MHz

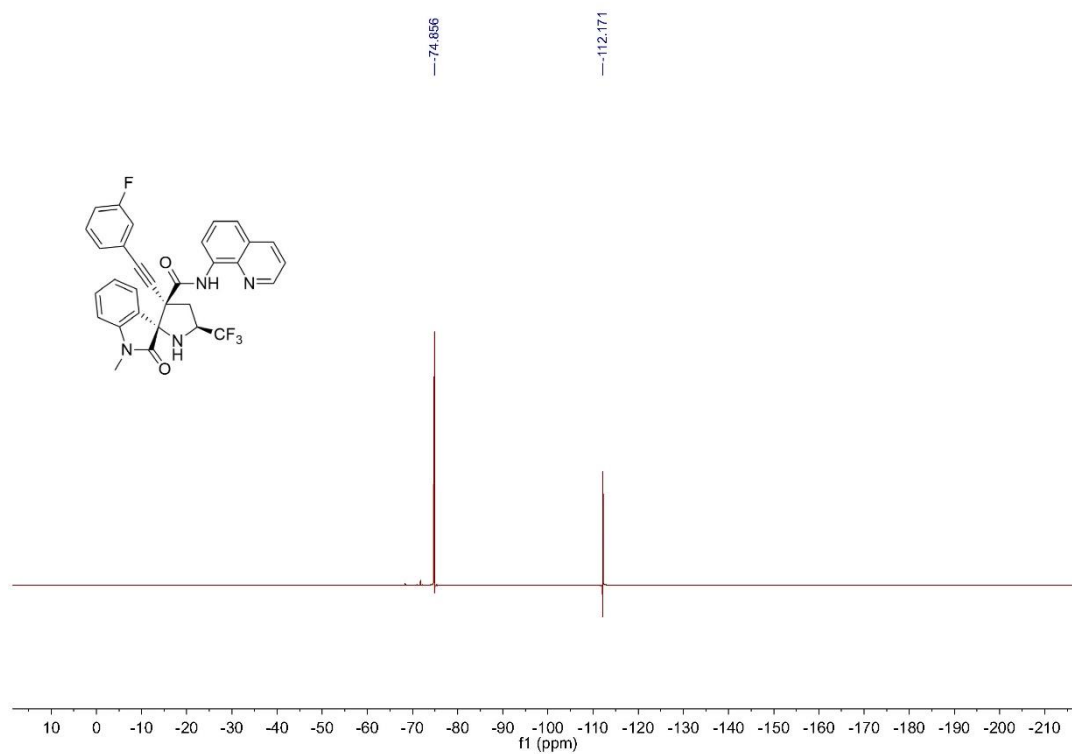

<sup>1</sup>H NMR spectrum of **3ha** in CDCl<sub>3</sub>, 400 MHz

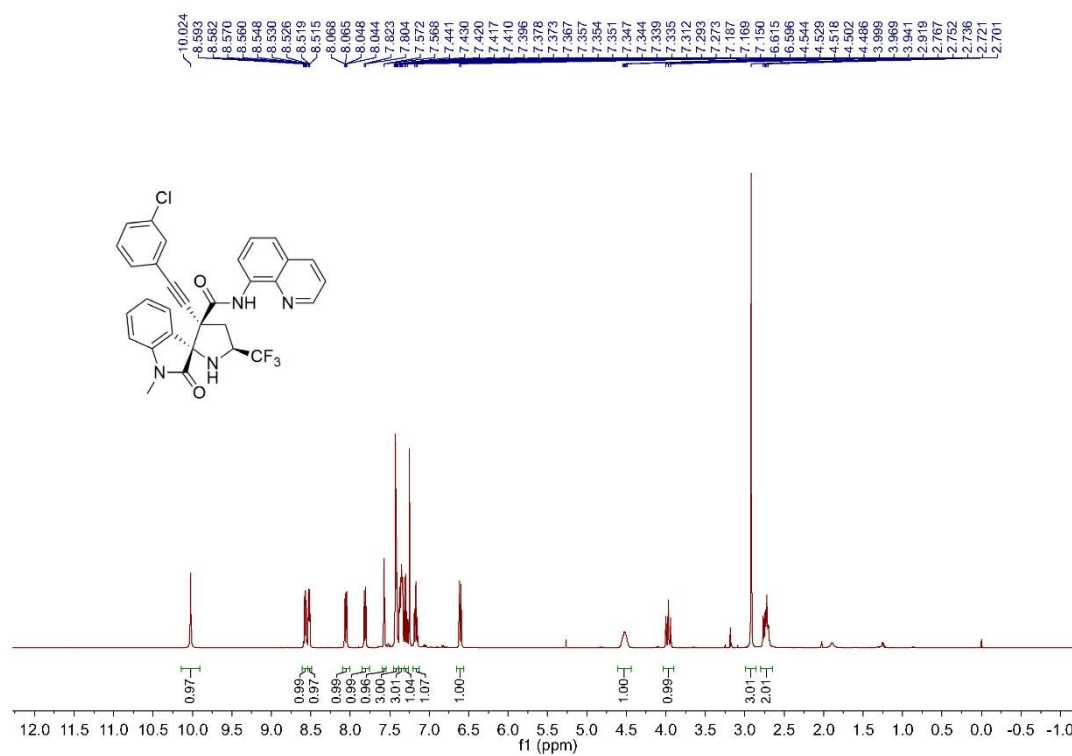

$^{13}\text{C}$  NMR spectrum of **3ha** in  $\text{CDCl}_3$ , 101 MHz

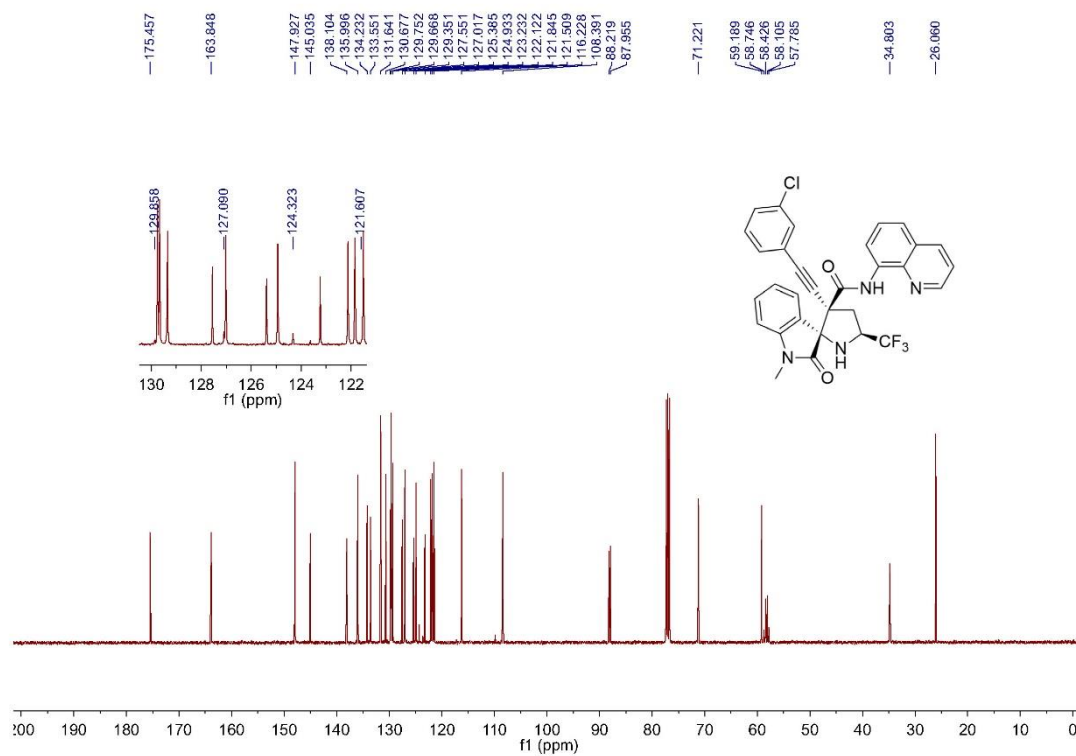

$^{19}\text{F}$  NMR spectrum of **3ha** in  $\text{CDCl}_3$ , 376 MHz

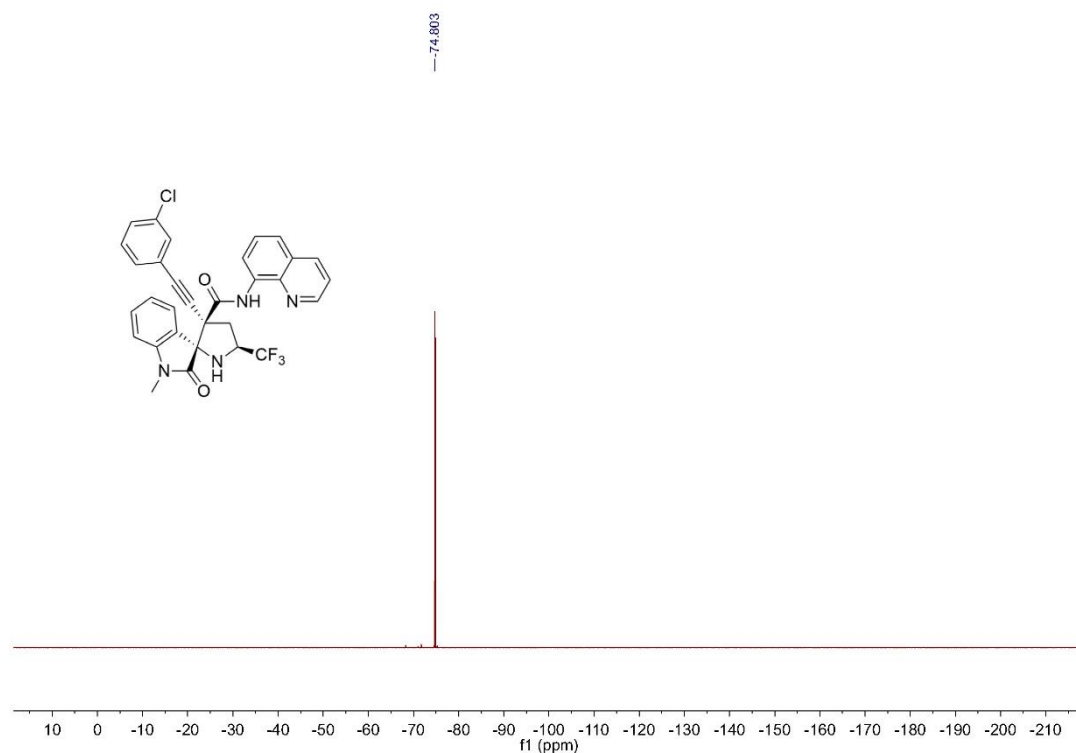



<sup>1</sup>H NMR spectrum of **3ia** in CDCl<sub>3</sub>, 400 MHz

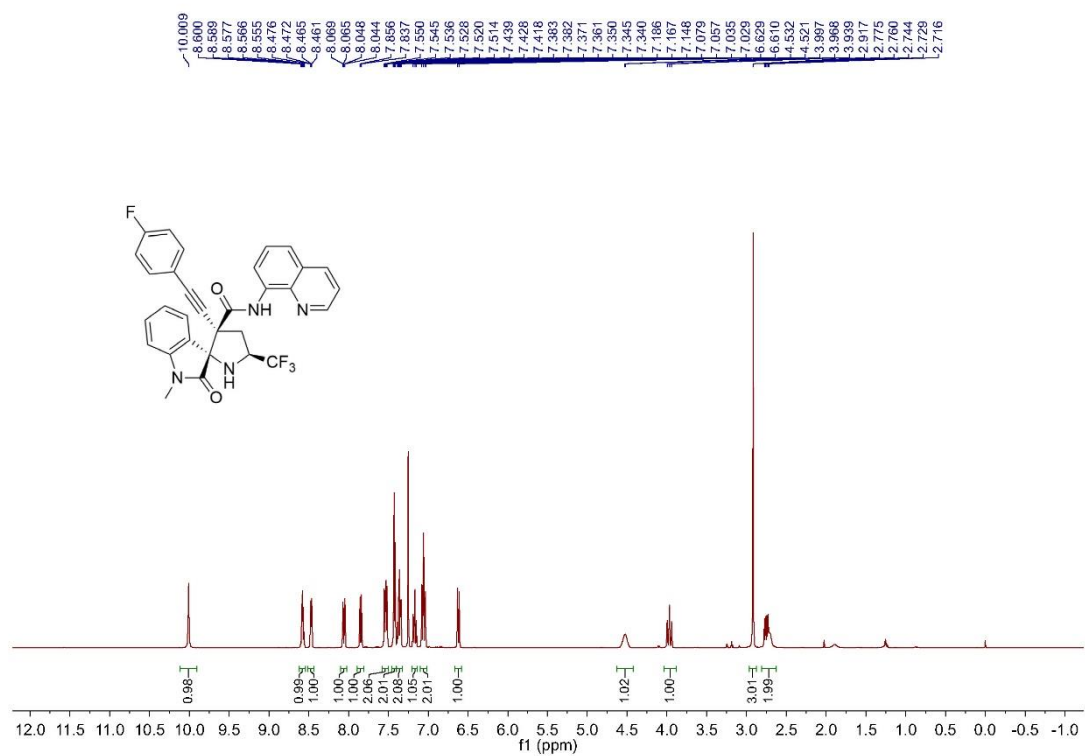

<sup>13</sup>C NMR spectrum of **3ia** in CDCl<sub>3</sub>, 101 MHz

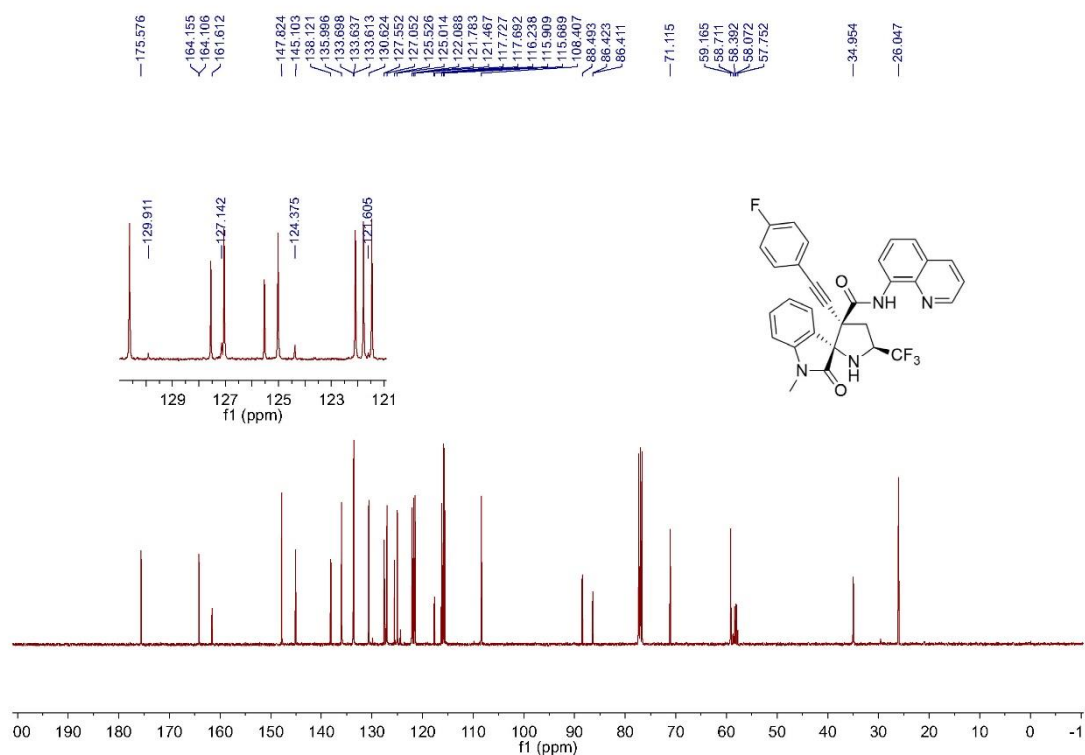

<sup>19</sup>F NMR spectrum of **3ia** in CDCl<sub>3</sub>, 376 MHz

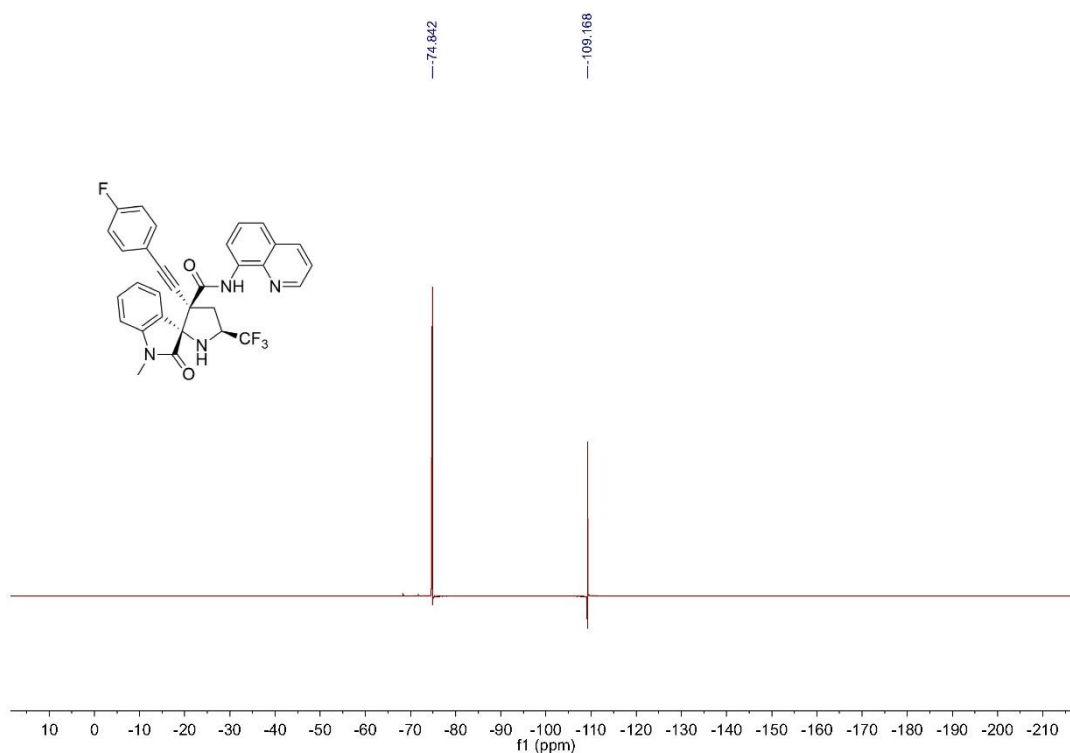

<sup>1</sup>H NMR spectrum of **3ja** in CDCl<sub>3</sub>, 400 MHz

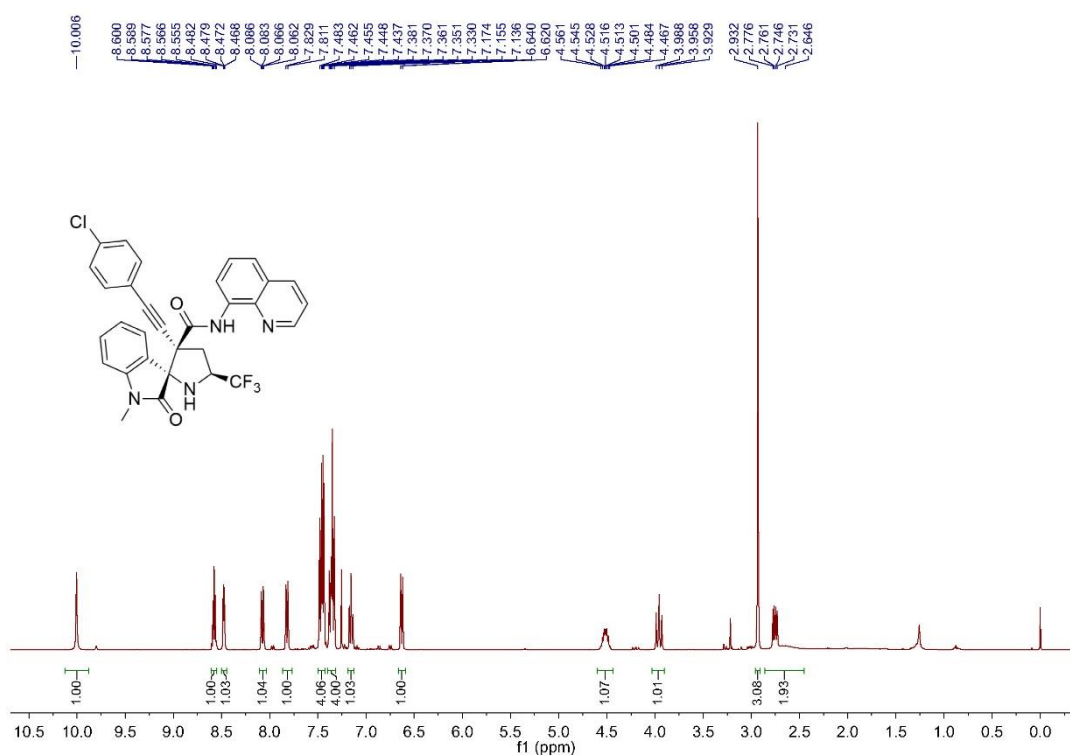

**<sup>13</sup>C NMR spectrum of 3ja in CDCl<sub>3</sub>, 101 MHz**

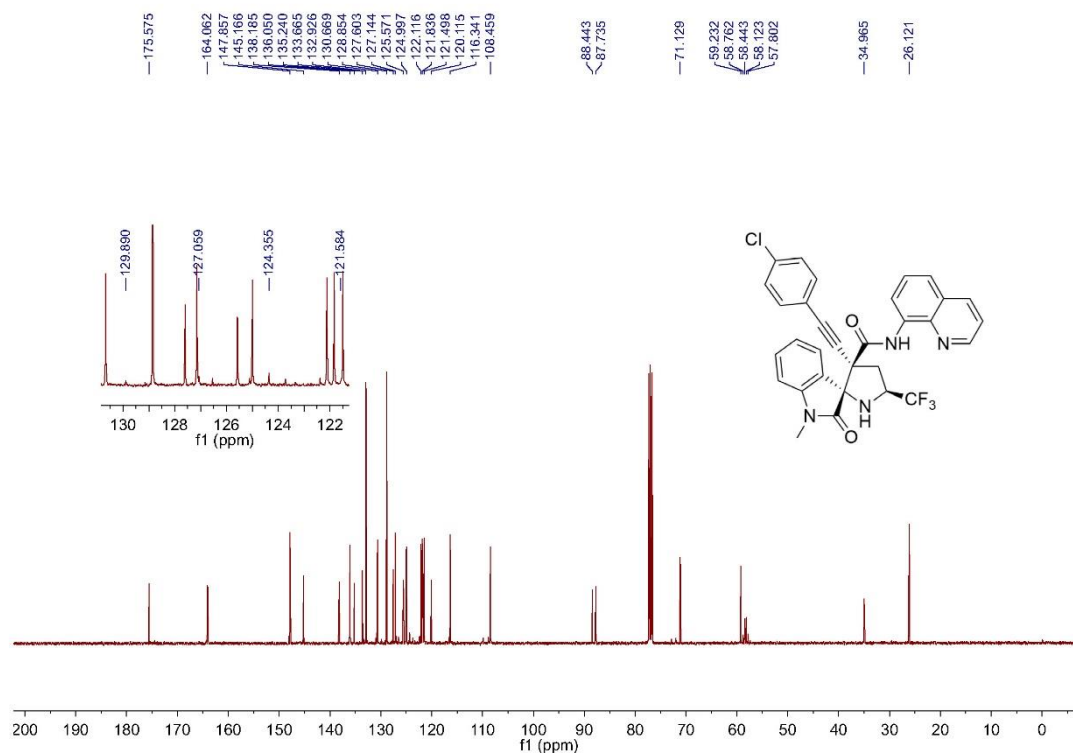

**<sup>19</sup>F NMR spectrum of 3ja in CDCl<sub>3</sub>, 376 MHz**

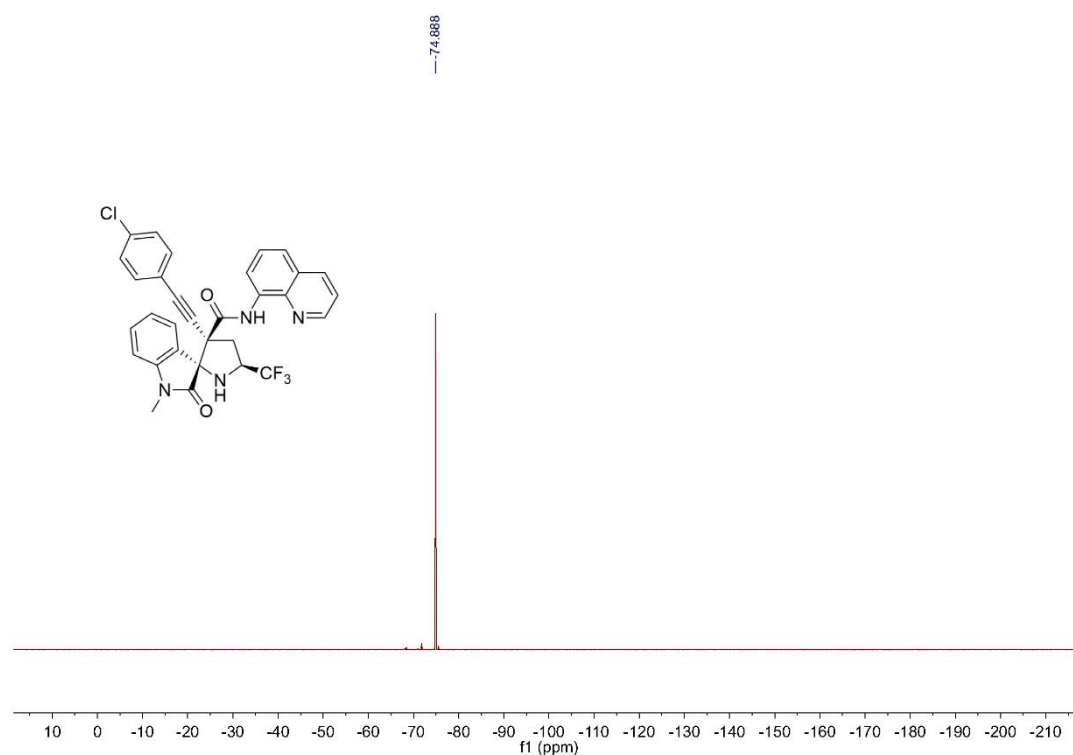

<sup>1</sup>H NMR spectrum of **3ka** in CDCl<sub>3</sub>, 400 MHz

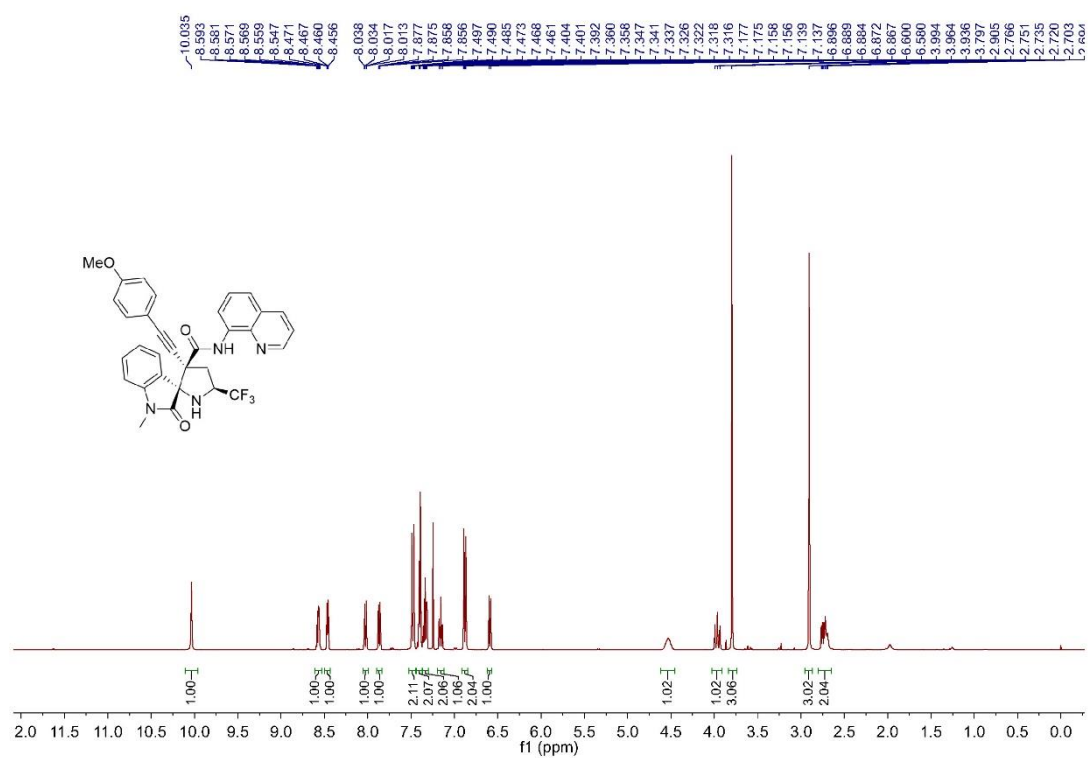

<sup>13</sup>C NMR spectrum of **3ka** in CDCl<sub>3</sub>, 101 MHz

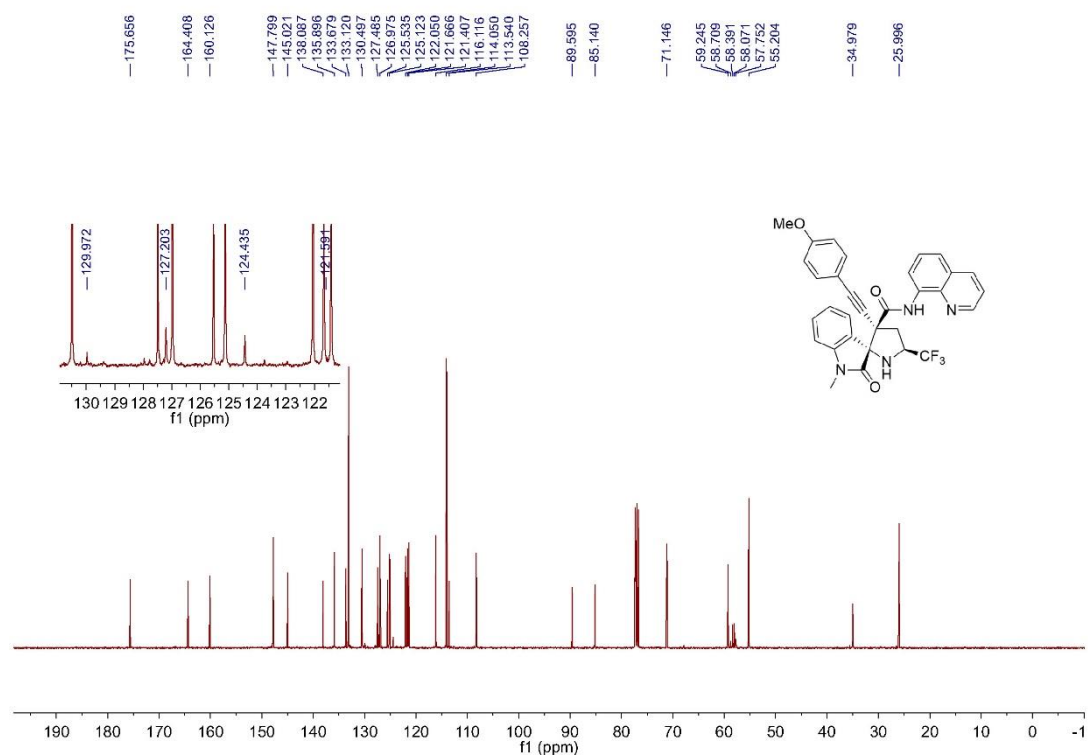

<sup>19</sup>F NMR spectrum of **3ka** in CDCl<sub>3</sub>, 376 MHz

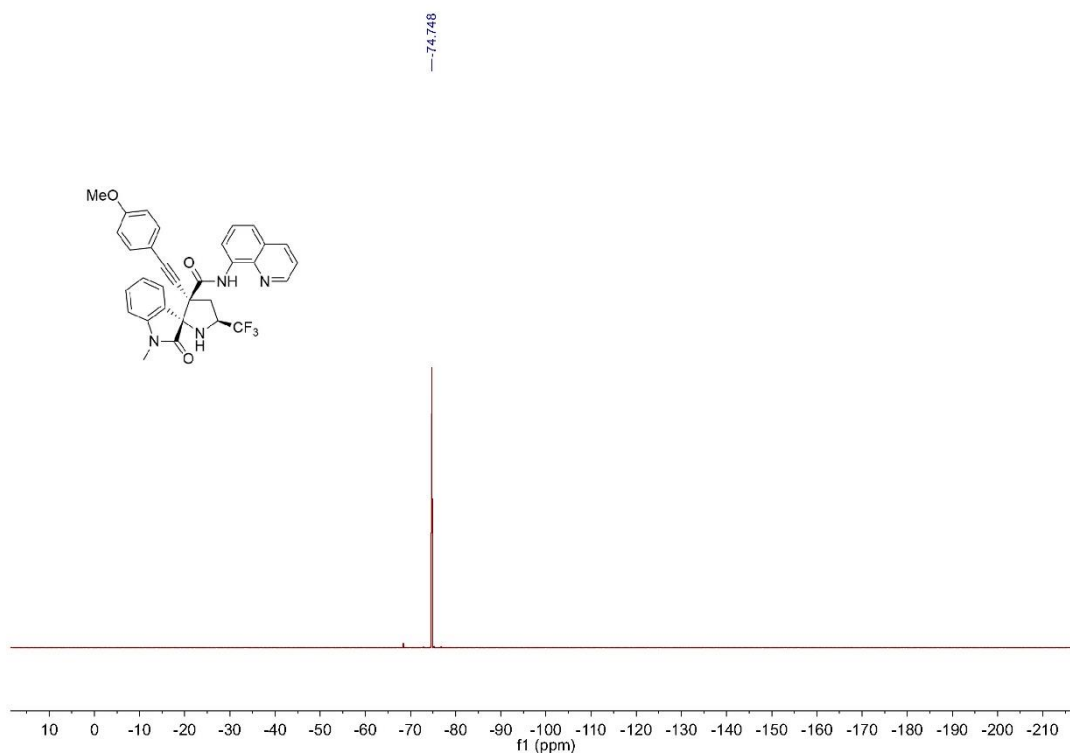

<sup>1</sup>H NMR spectrum of **3la** in CDCl<sub>3</sub>, 400 MHz

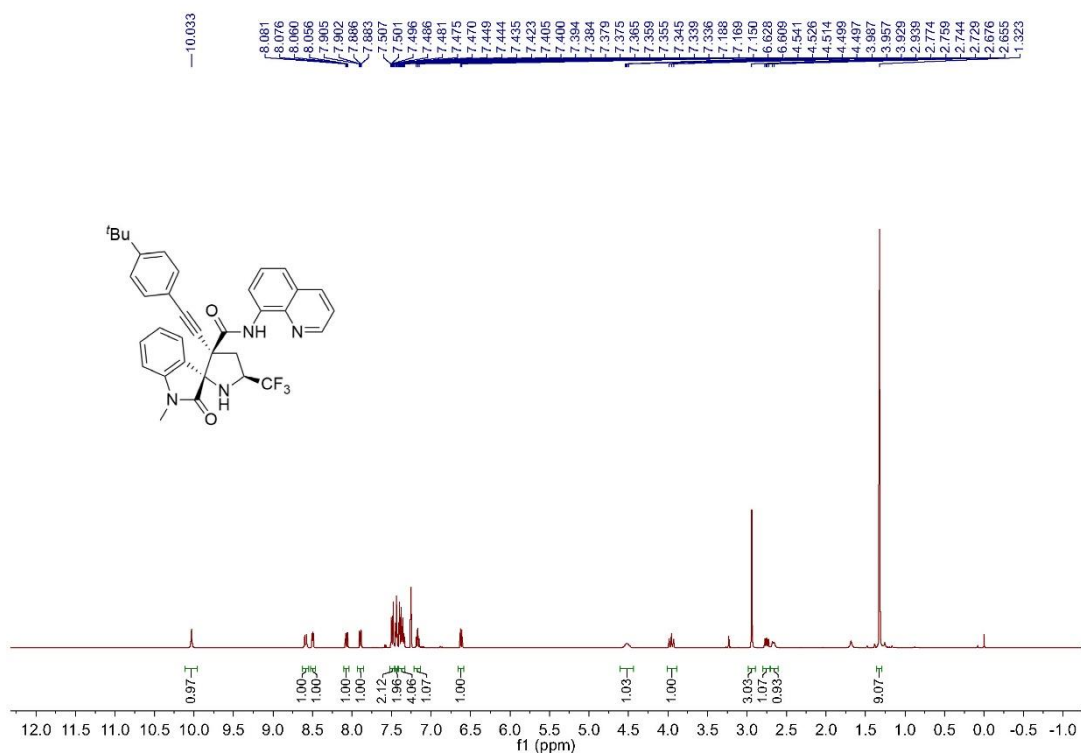

<sup>13</sup>C NMR spectrum of **3la** in CDCl<sub>3</sub>, 101 MHz

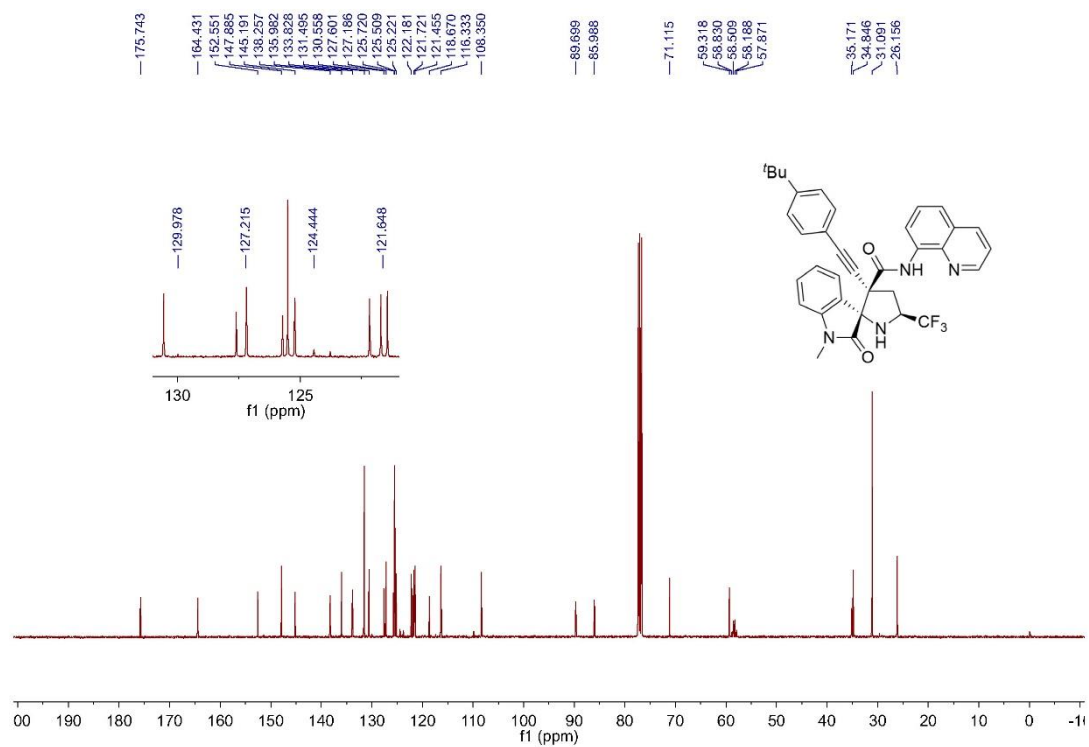

<sup>19</sup>F NMR spectrum of **3la** in CDCl<sub>3</sub>, 376 MHz

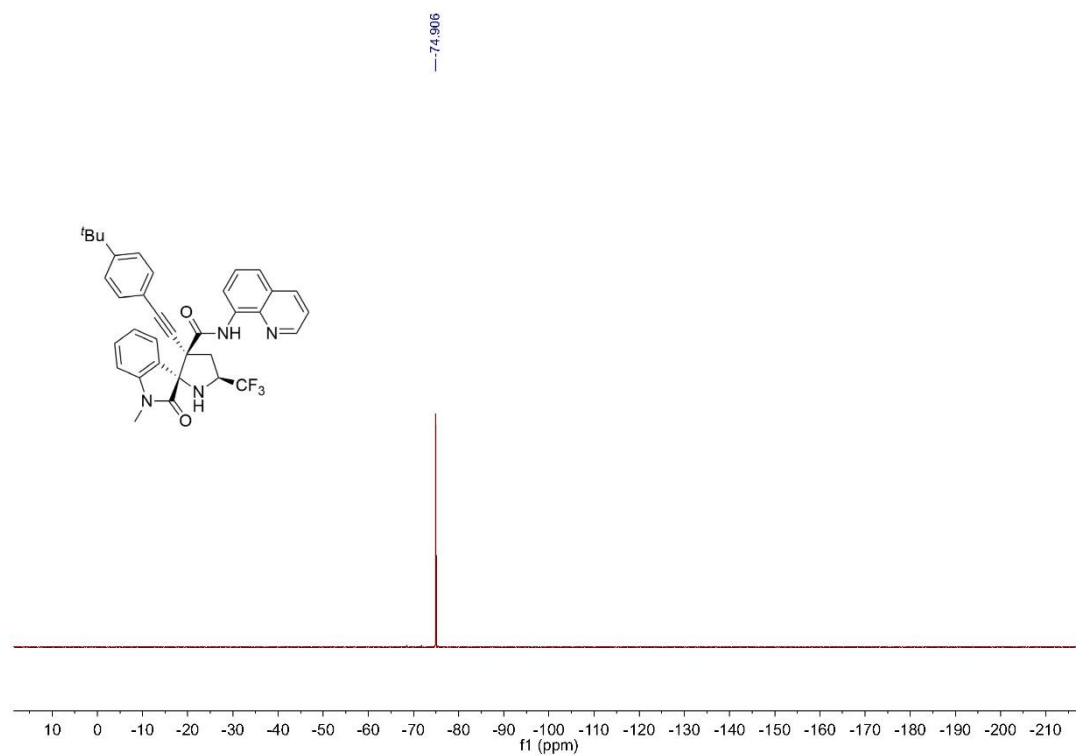

<sup>1</sup>H NMR spectrum of **3ma** in CDCl<sub>3</sub>, 400 MHz

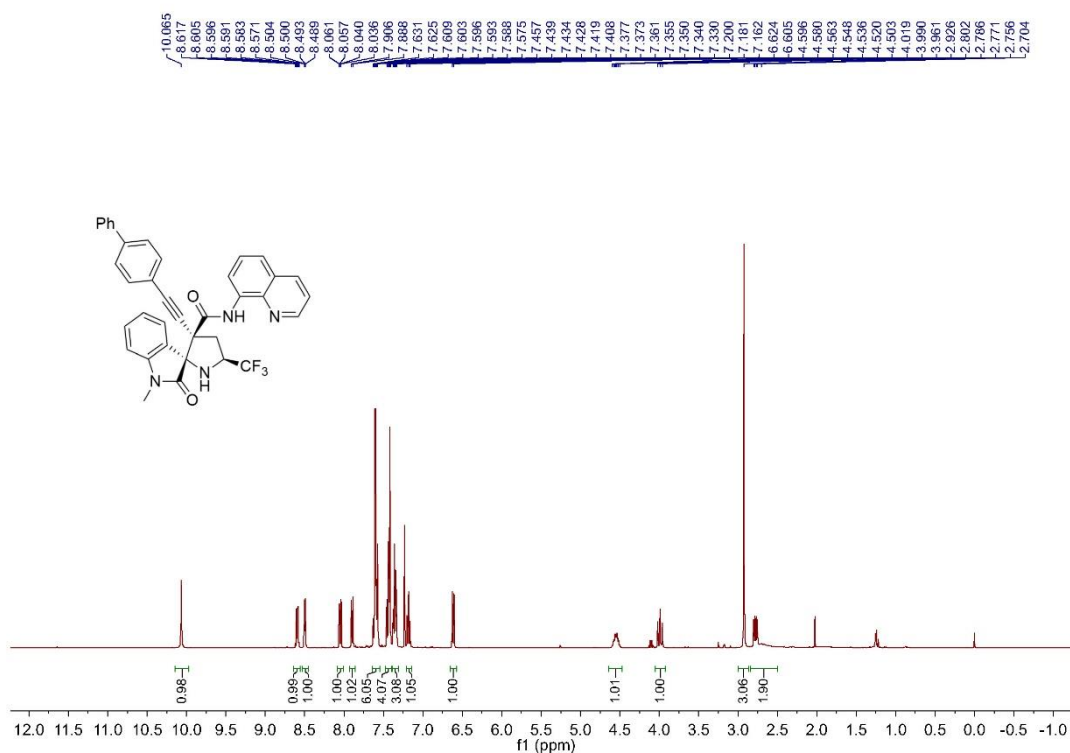

<sup>13</sup>C NMR spectrum of **3ma** in CDCl<sub>3</sub>, 101 MHz

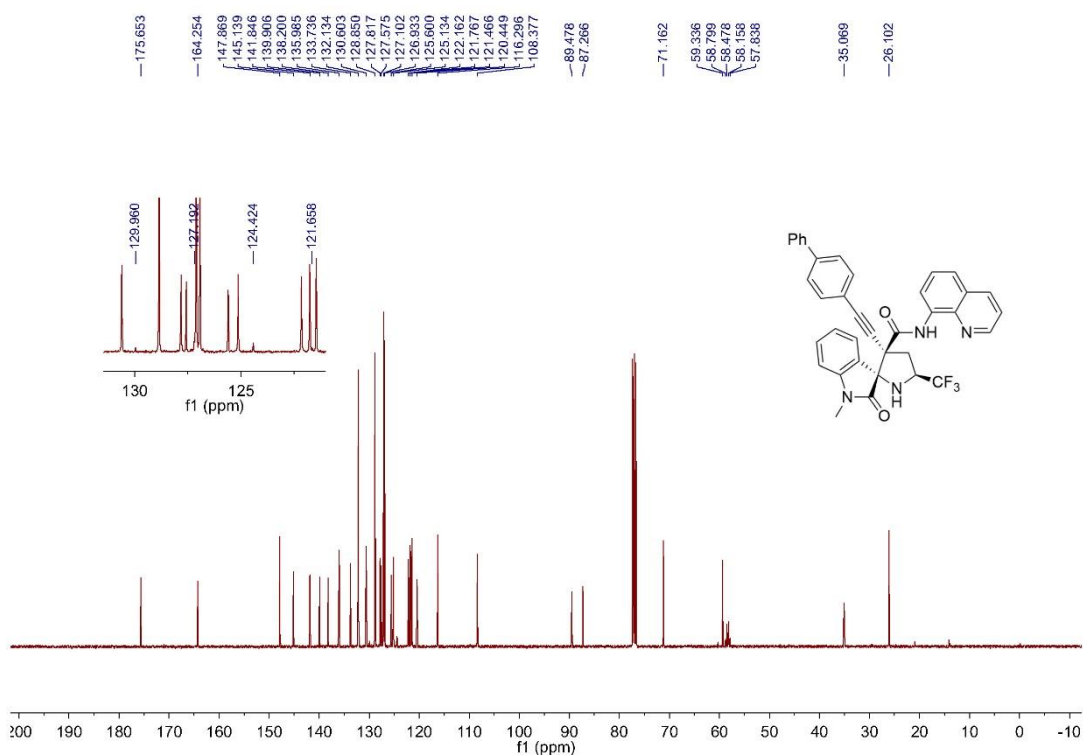

<sup>19</sup>F NMR spectrum of **3ma** in CDCl<sub>3</sub>, 376 MHz

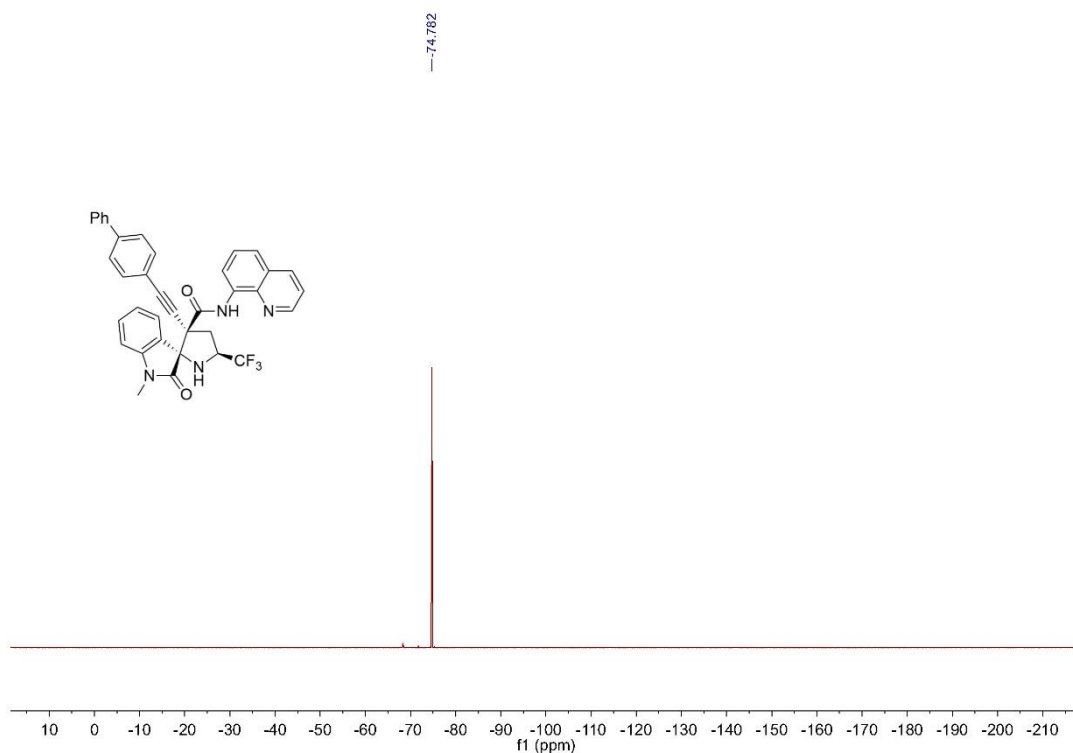

<sup>1</sup>H NMR spectrum of **3na** in CDCl<sub>3</sub>, 400 MHz

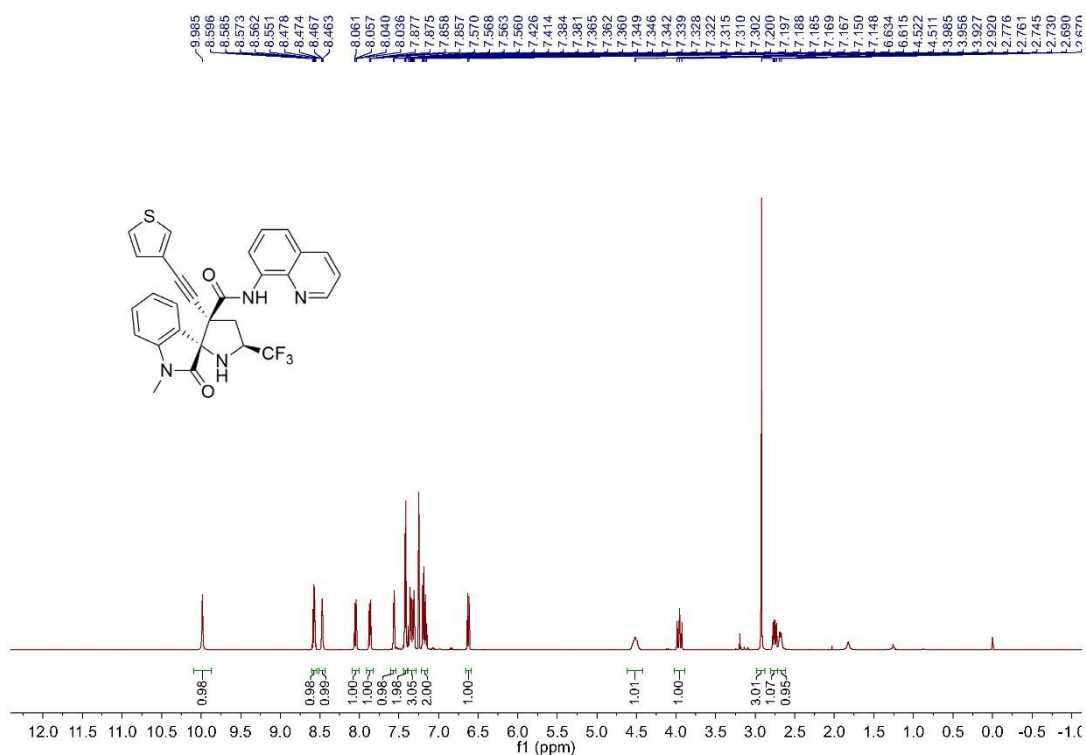



<sup>13</sup>C NMR spectrum of **3na** in CDCl<sub>3</sub>, 101 MHz

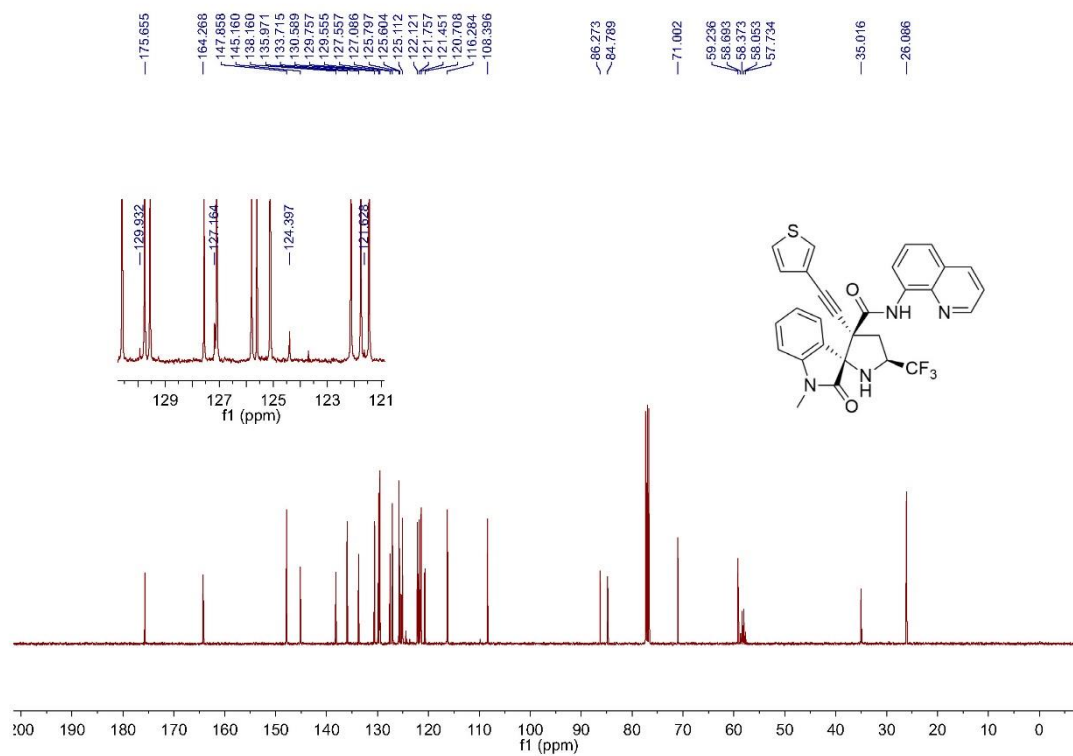

<sup>19</sup>F NMR spectrum of **3na** in CDCl<sub>3</sub>, 376 MHz

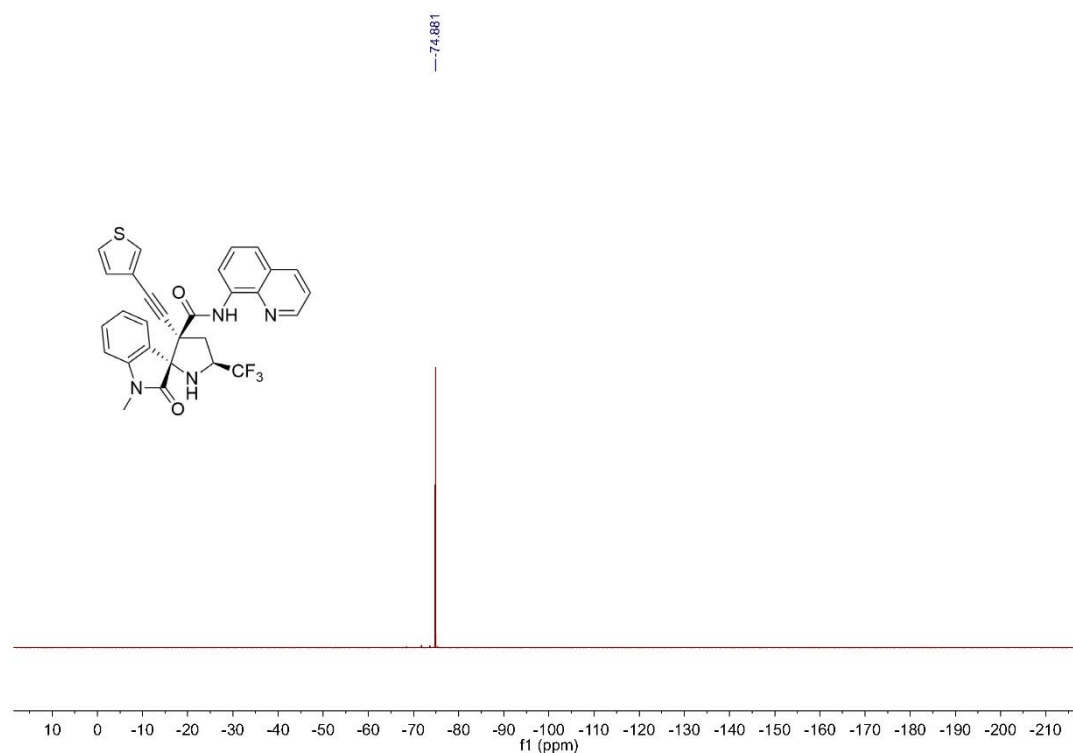

<sup>1</sup>H NMR spectrum of **30a** in CDCl<sub>3</sub>, 400 MHz

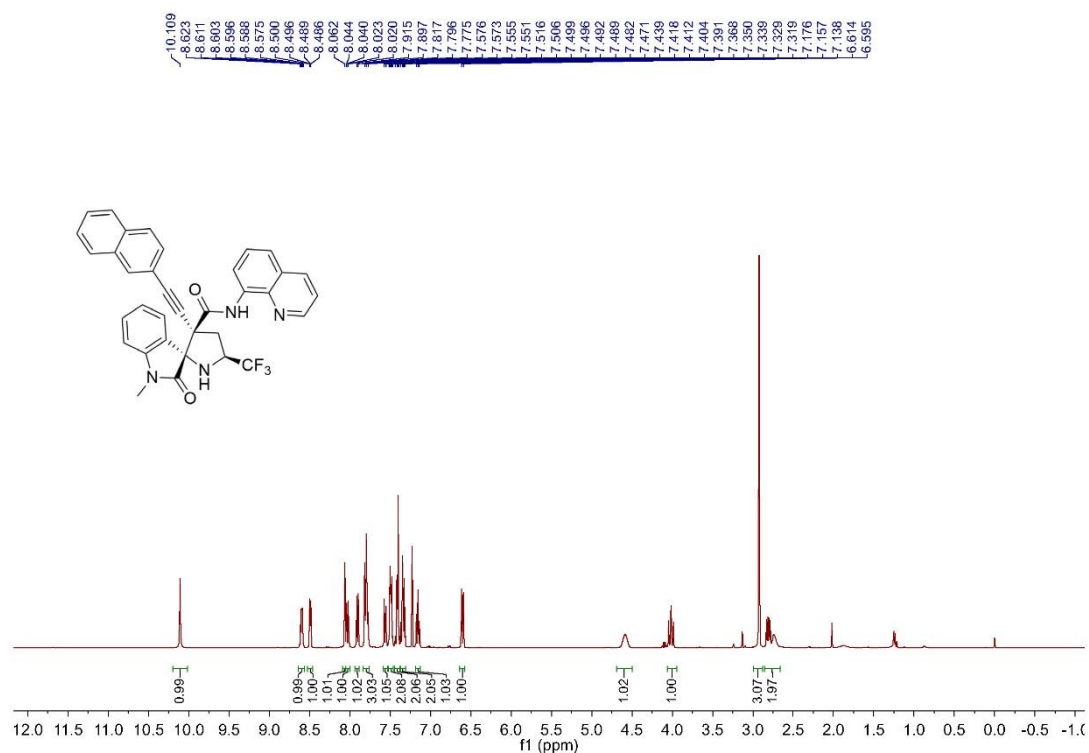

<sup>13</sup>C NMR spectrum of **30a** in CDCl<sub>3</sub>, 101 MHz

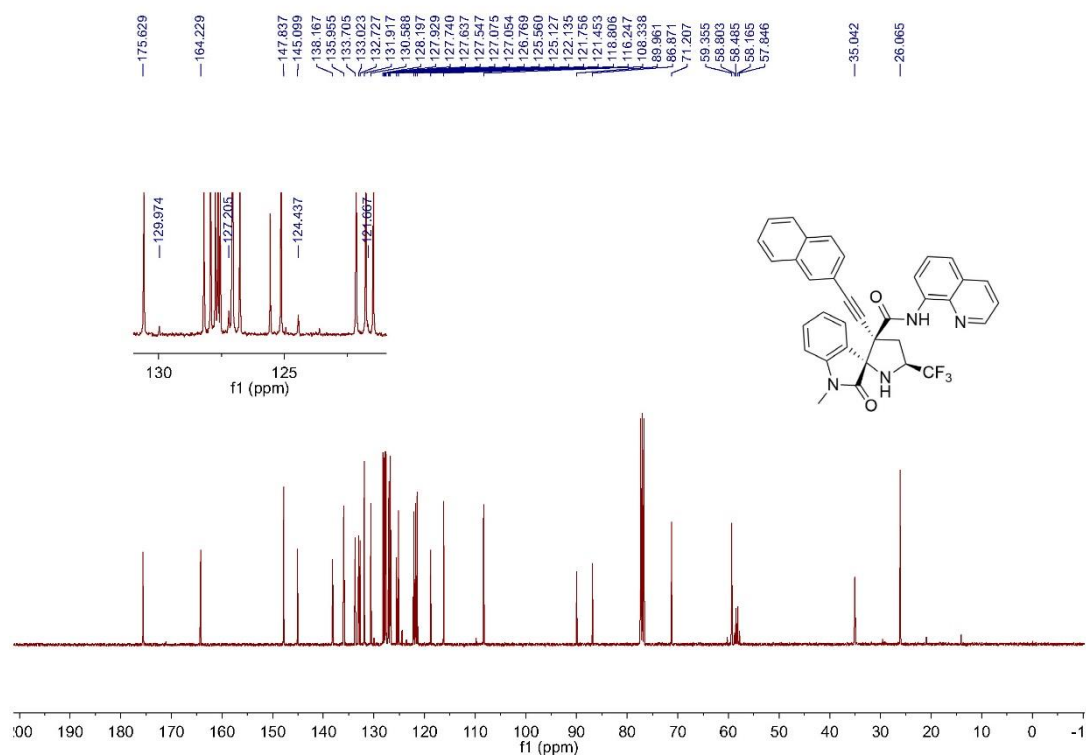

<sup>19</sup>F NMR spectrum of **30a** in CDCl<sub>3</sub>, 376 MHz

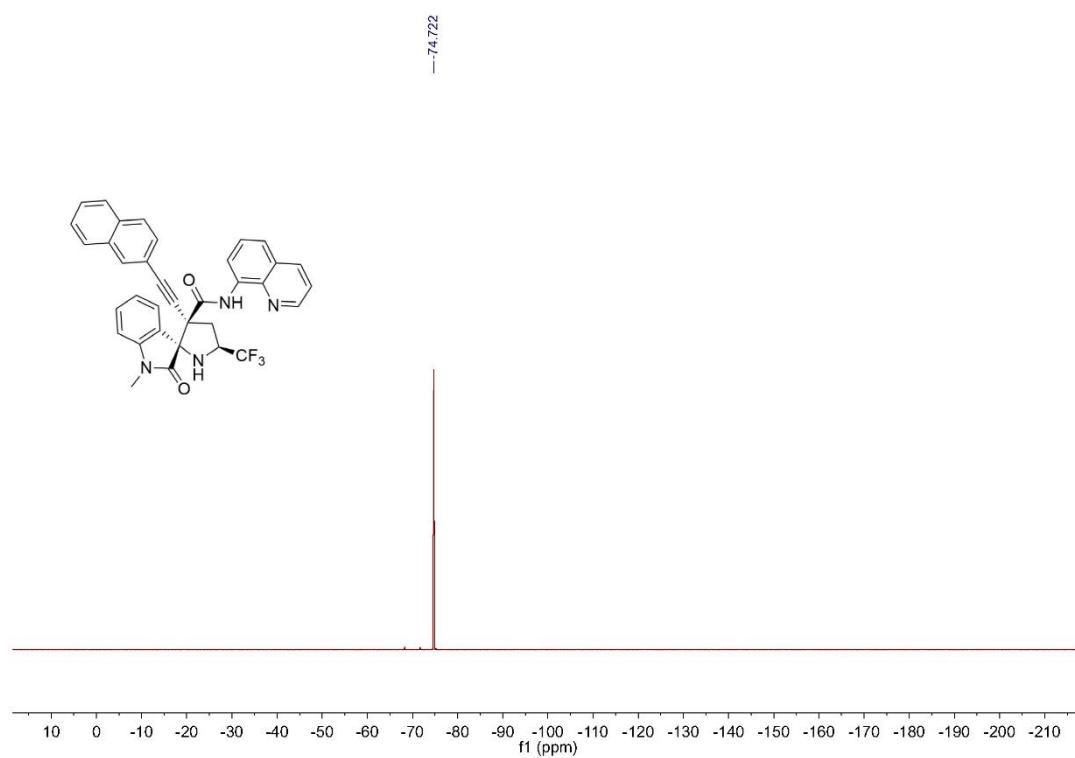

<sup>1</sup>H NMR spectrum of **3pa** in CDCl<sub>3</sub>, 400 MHz

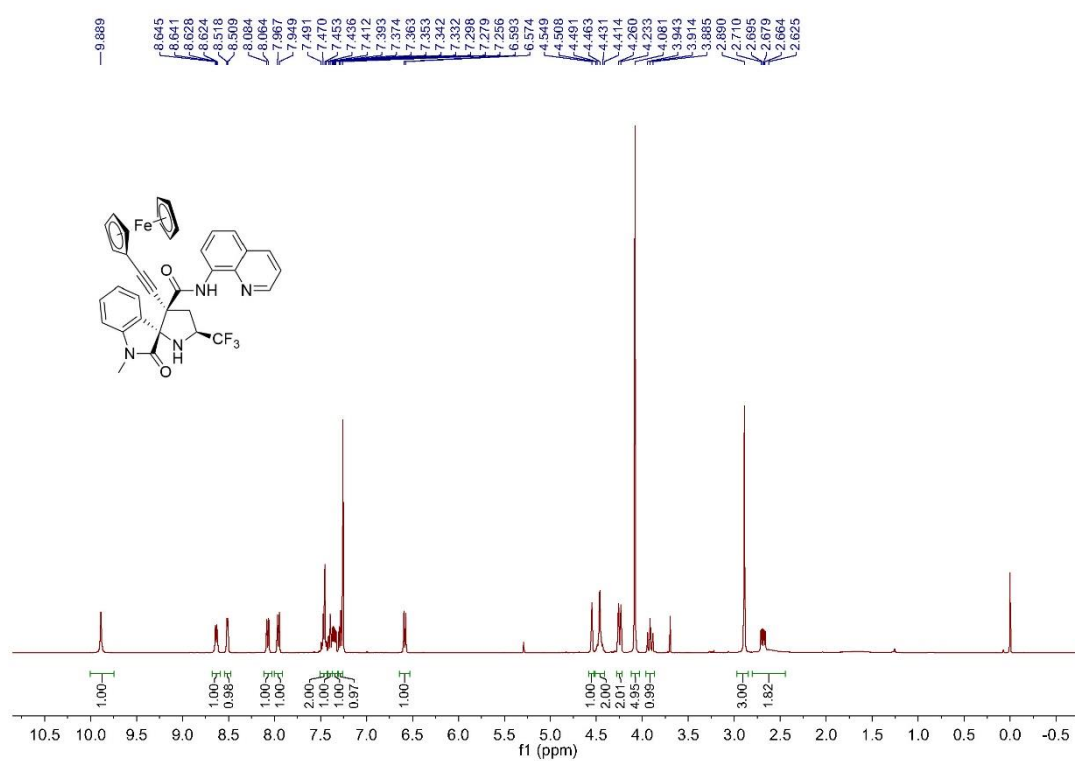

$^{13}\text{C}$  NMR spectrum of **3pa** in  $\text{CDCl}_3$ , 101 MHz

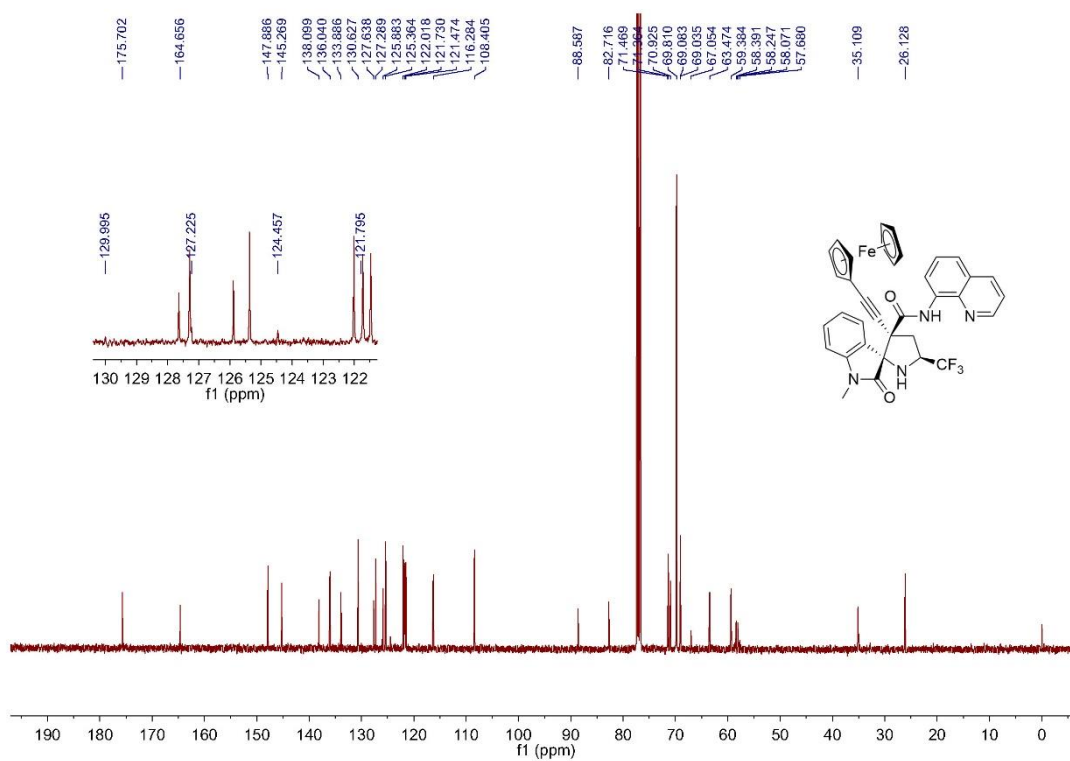

$^{19}\text{F}$  NMR spectrum of **3pa** in  $\text{CDCl}_3$ , 376 MHz

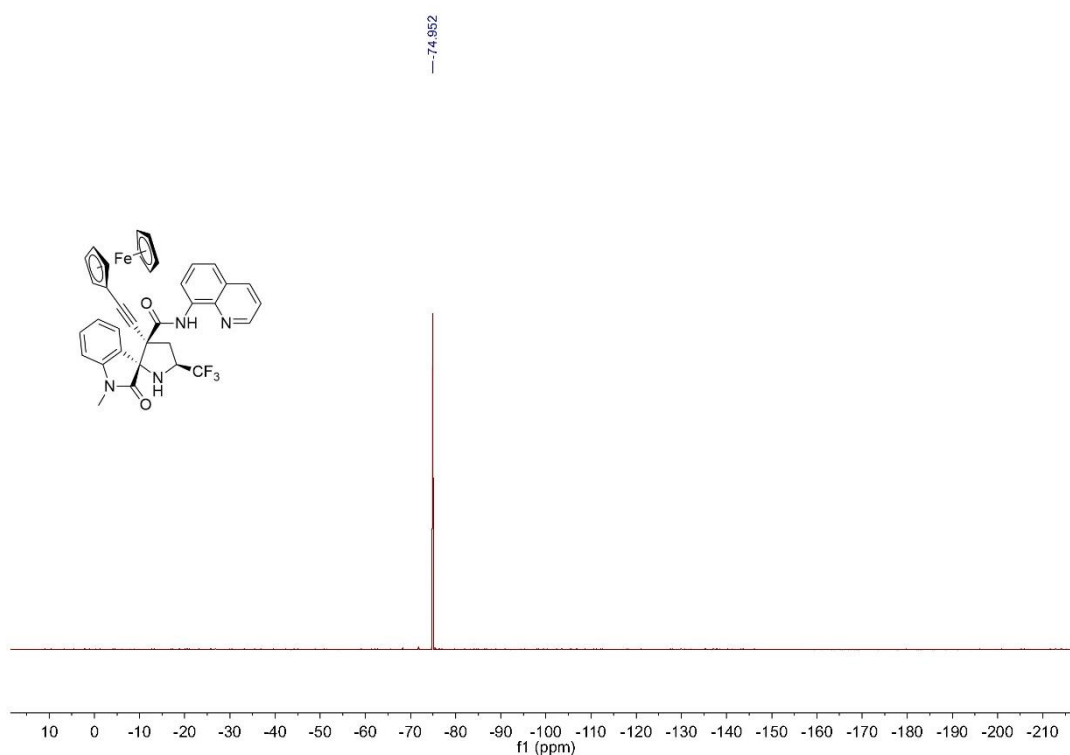

<sup>1</sup>H NMR spectrum of **3qa** in CDCl<sub>3</sub>, 400 MHz

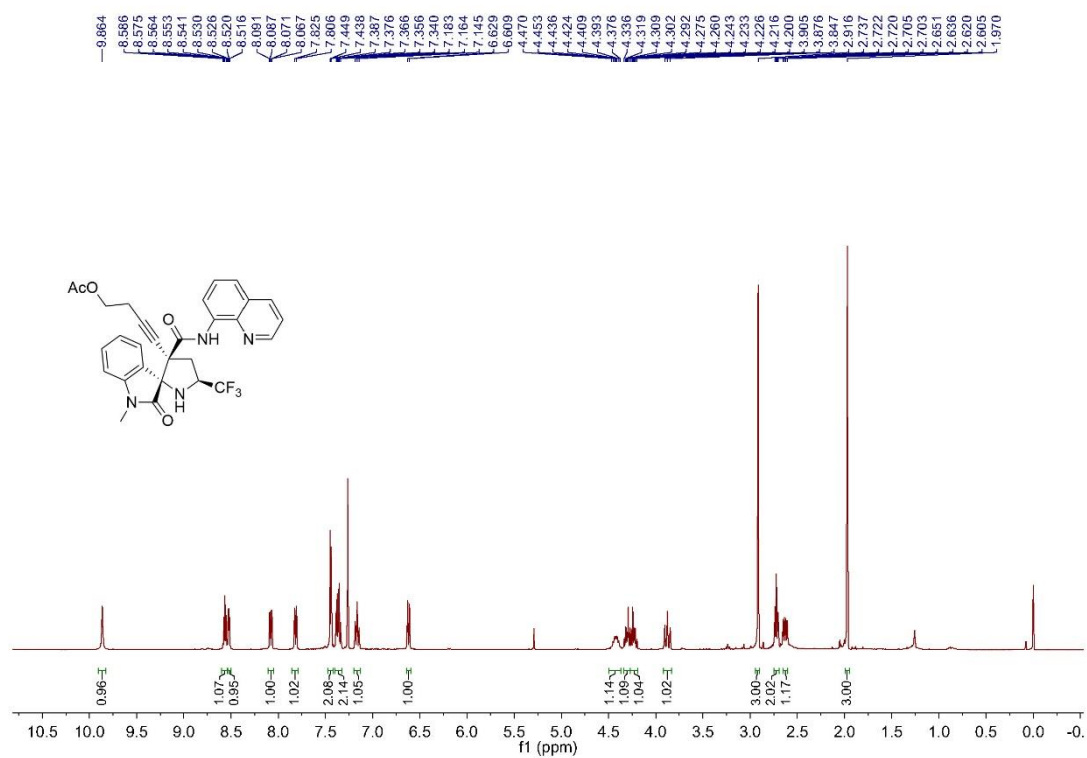

<sup>13</sup>C NMR spectrum of **3qa** in CDCl<sub>3</sub>, 101 MHz

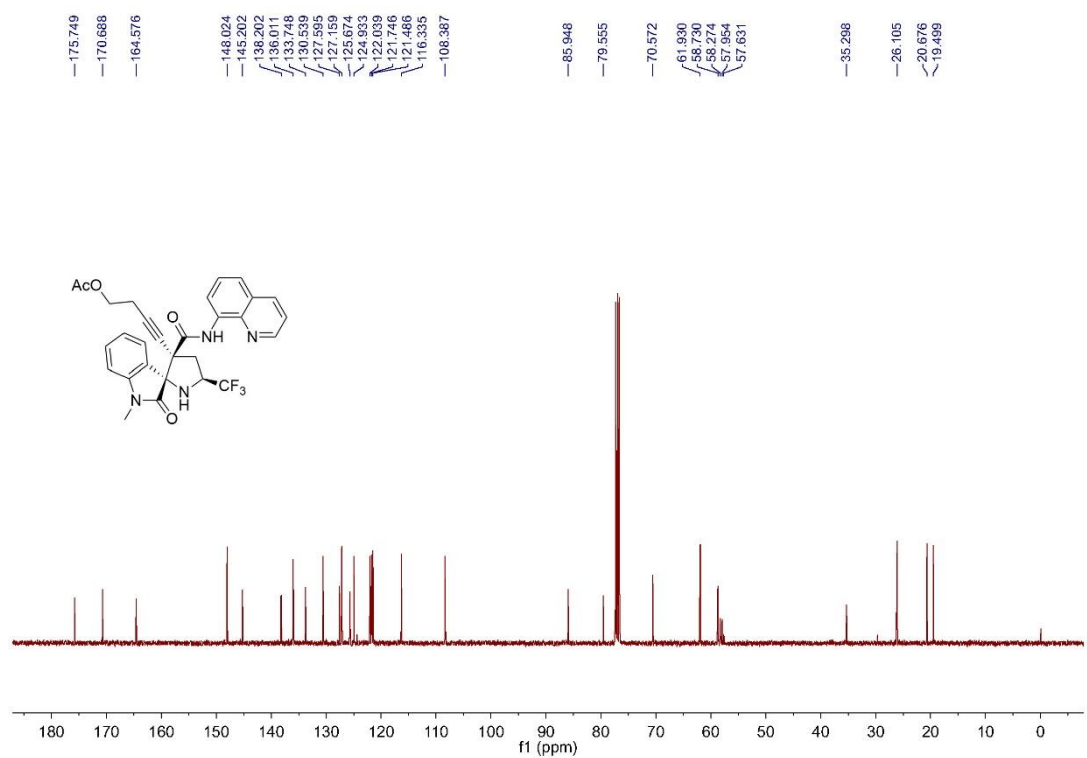

<sup>19</sup>F NMR spectrum of **3qa** in CDCl<sub>3</sub>, 376 MHz

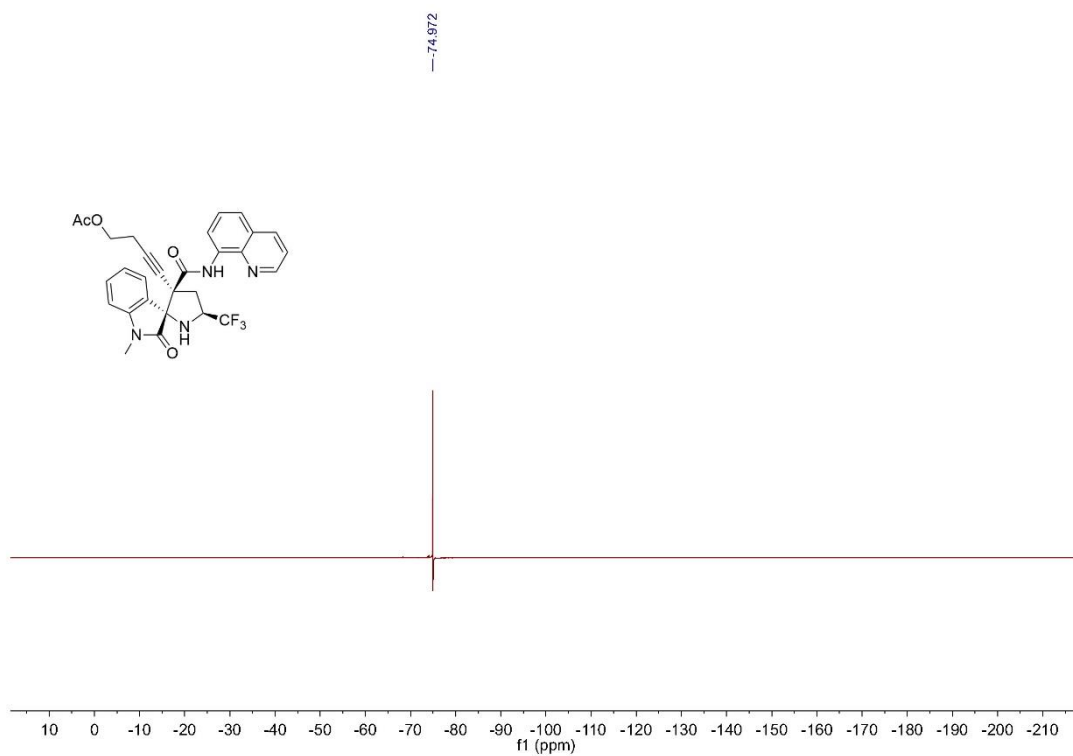

<sup>1</sup>H NMR spectrum of **3ra** in CDCl<sub>3</sub>, 400 MHz

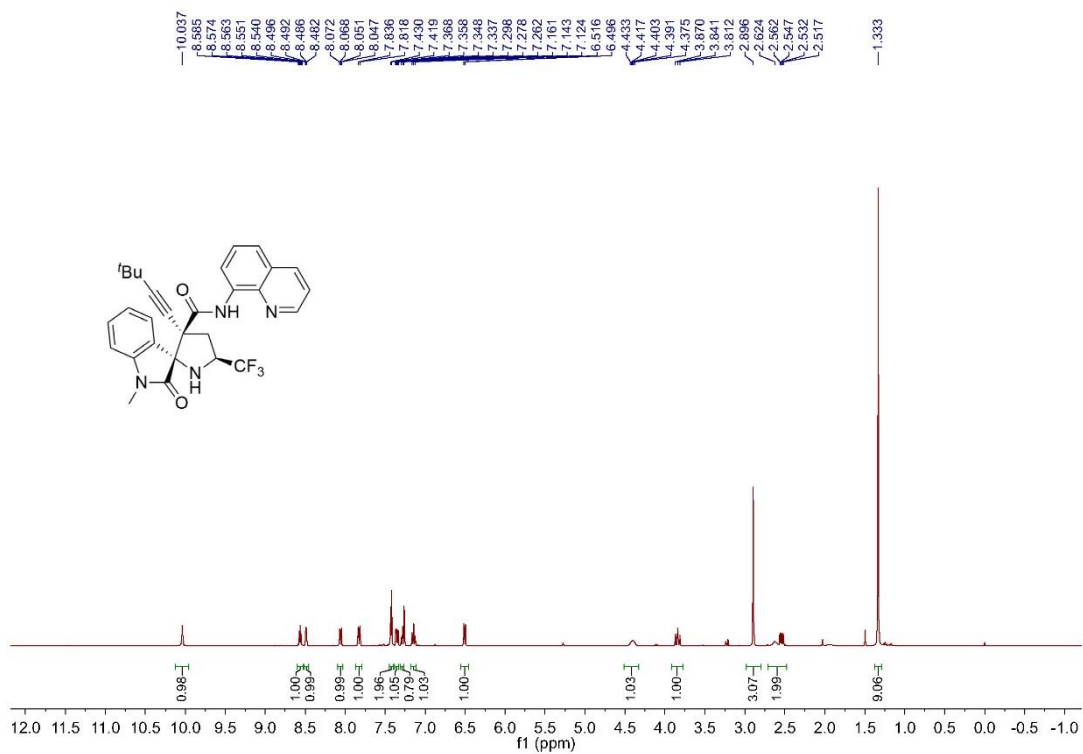

**<sup>13</sup>C NMR spectrum of 3ra in CDCl<sub>3</sub>, 101 MHz**

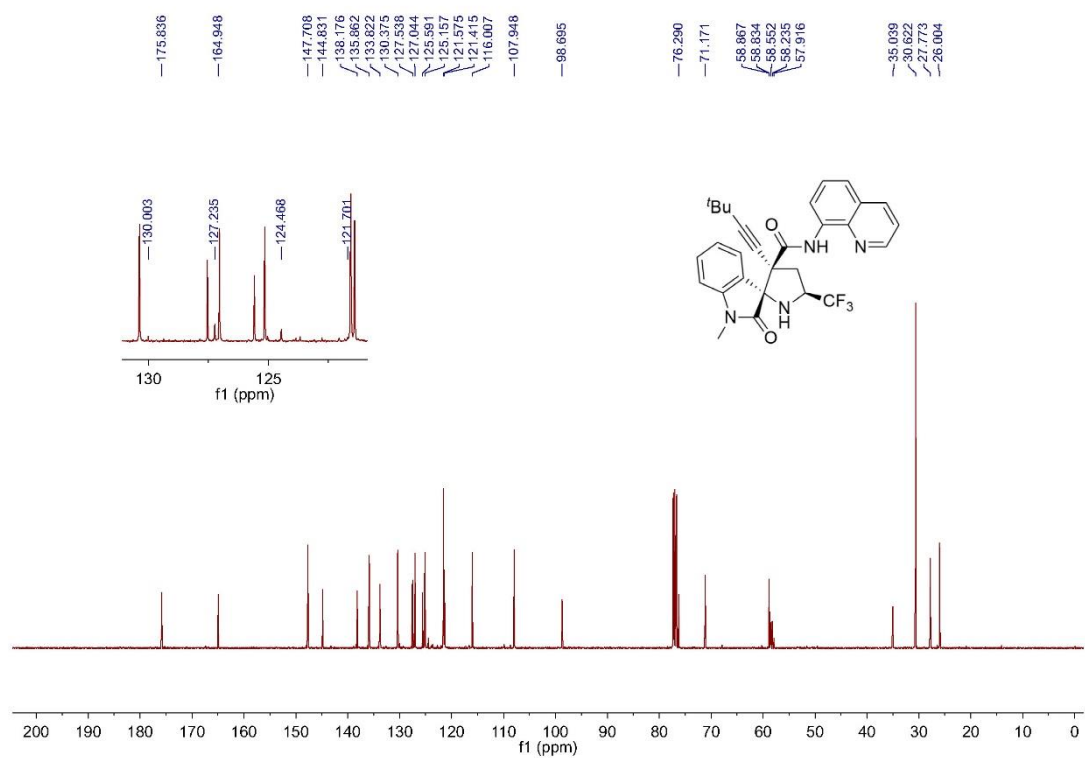

**<sup>19</sup>F NMR spectrum of 3ra in CDCl<sub>3</sub>, 376 MHz**

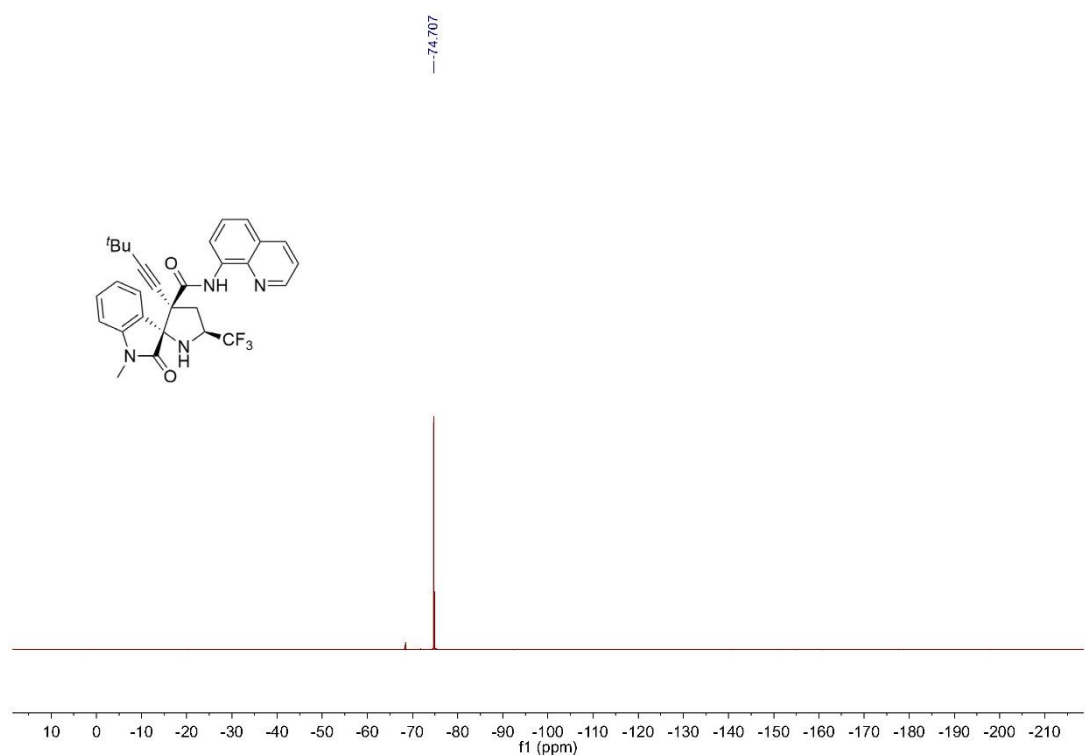

<sup>1</sup>H NMR spectrum of **3sa** in CDCl<sub>3</sub>, 400 MHz

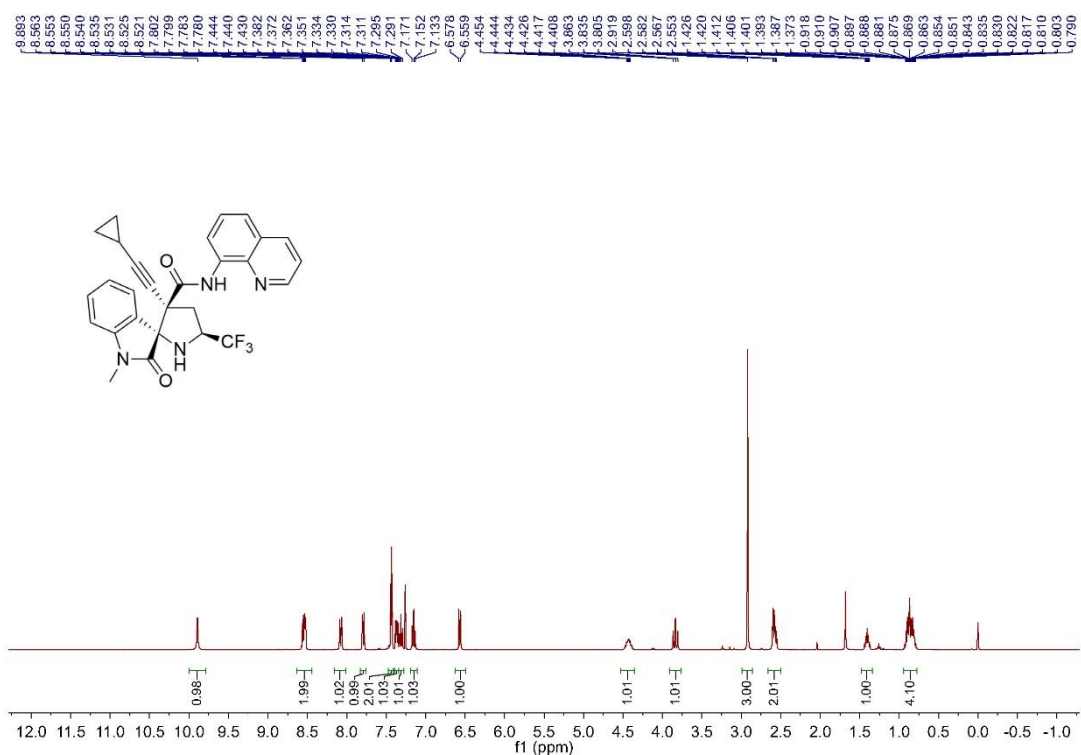

<sup>13</sup>C NMR spectrum of **3sa** in CDCl<sub>3</sub>, 101 MHz

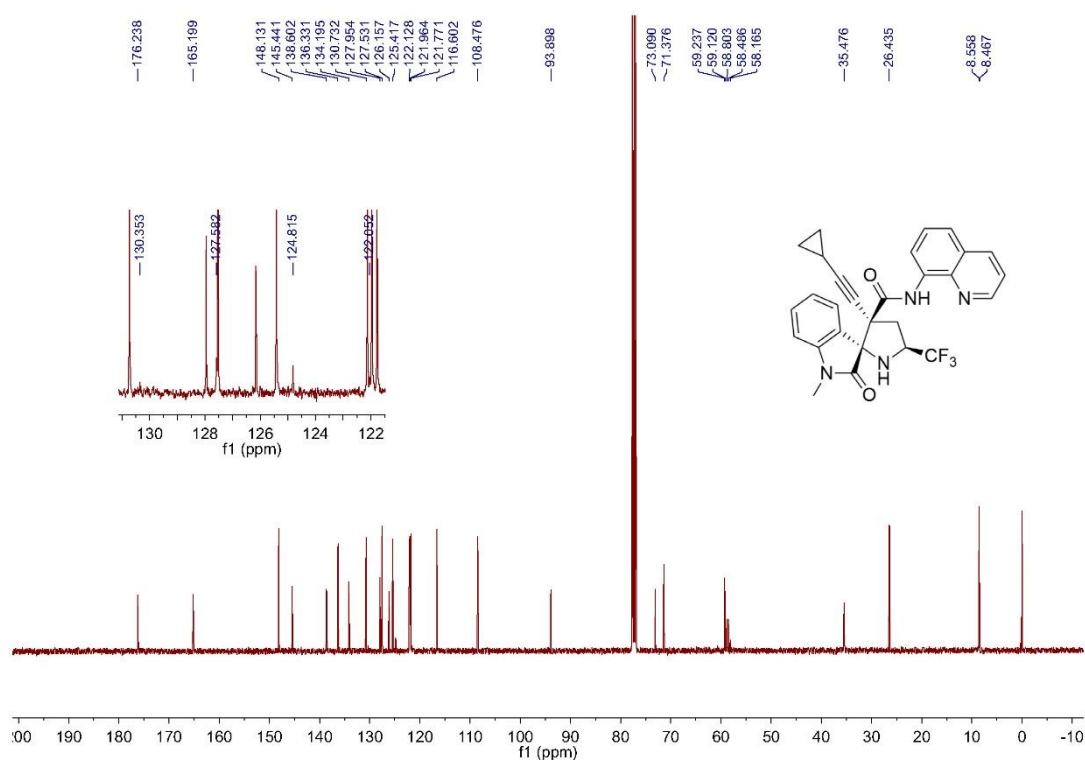



<sup>19</sup>F NMR spectrum of **3sa** in CDCl<sub>3</sub>, 376 MHz

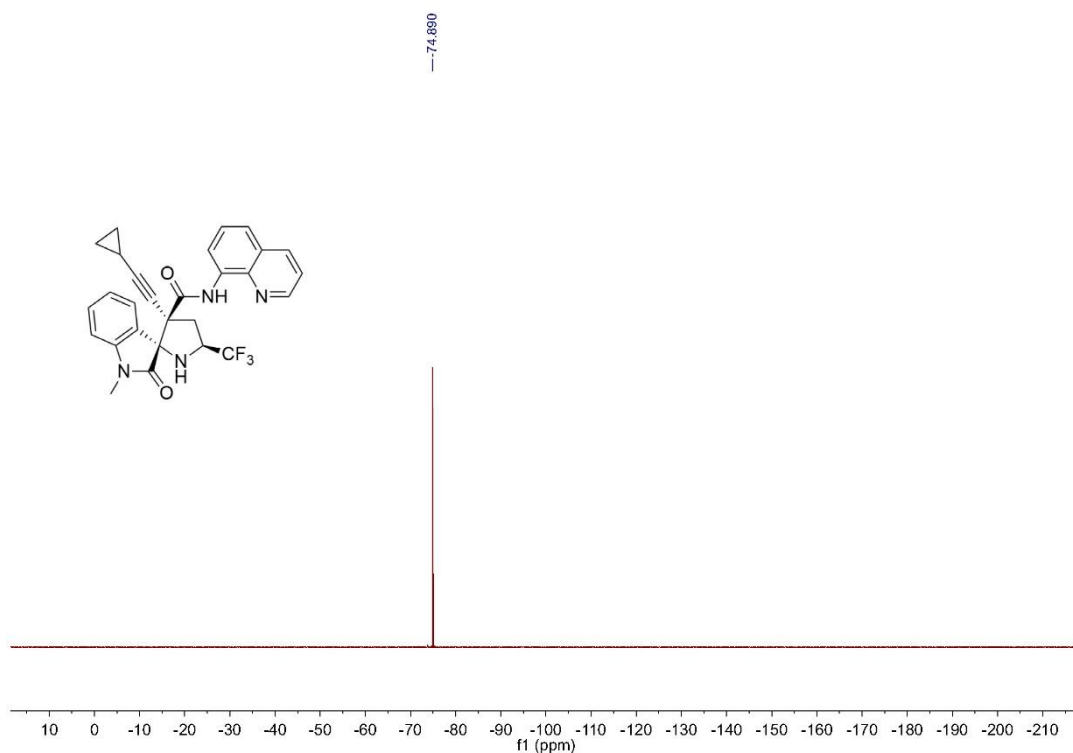

<sup>1</sup>H NMR spectrum of **3ta** in CDCl<sub>3</sub>, 400 MHz

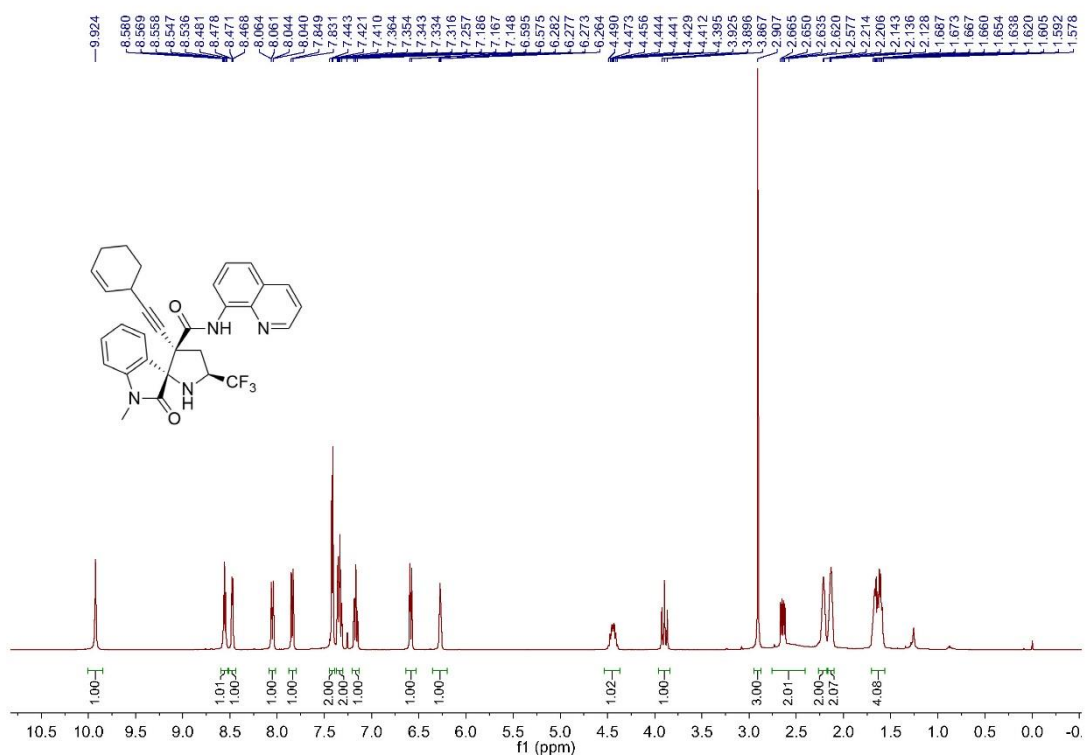

<sup>13</sup>C NMR spectrum of **3ta** in CDCl<sub>3</sub>, 101 MHz

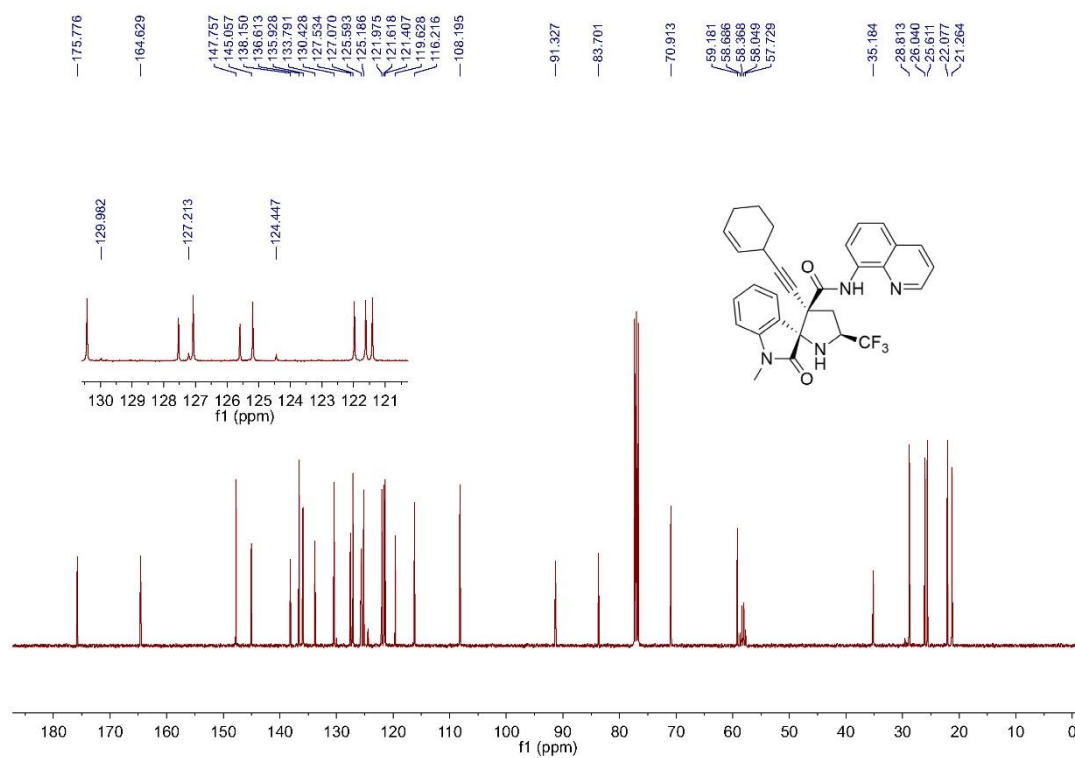

<sup>19</sup>F NMR spectrum of **3ta** in CDCl<sub>3</sub>, 376 MHz

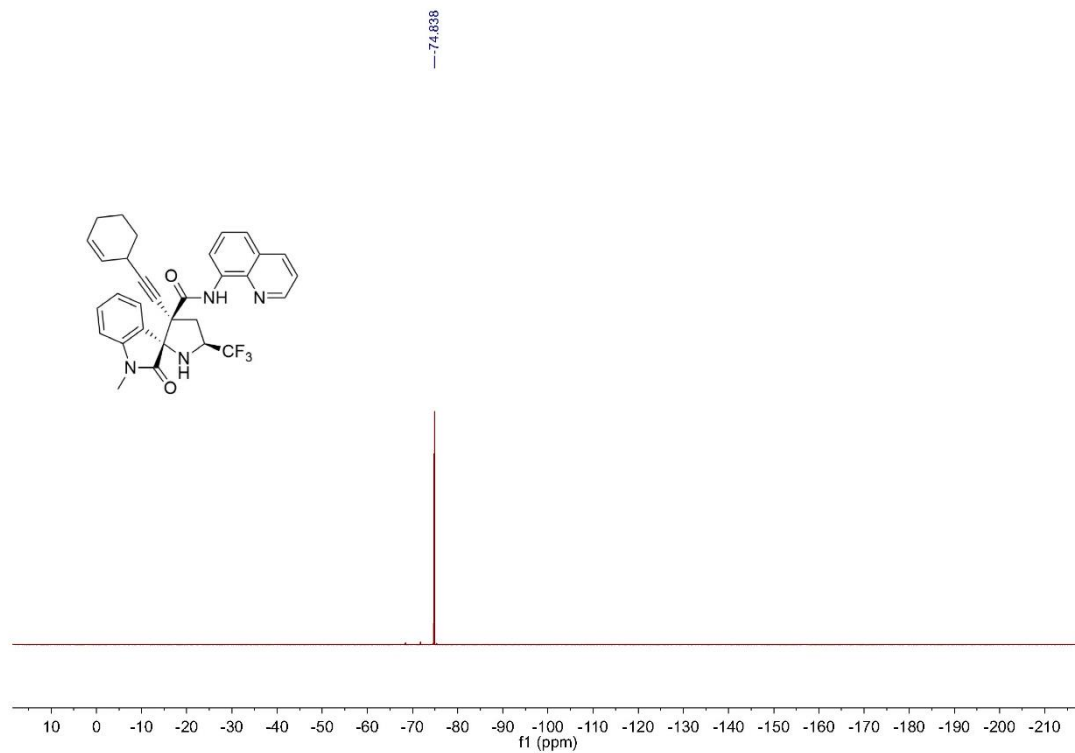

<sup>1</sup>H NMR spectrum of **3ua** in CDCl<sub>3</sub>, 400 MHz

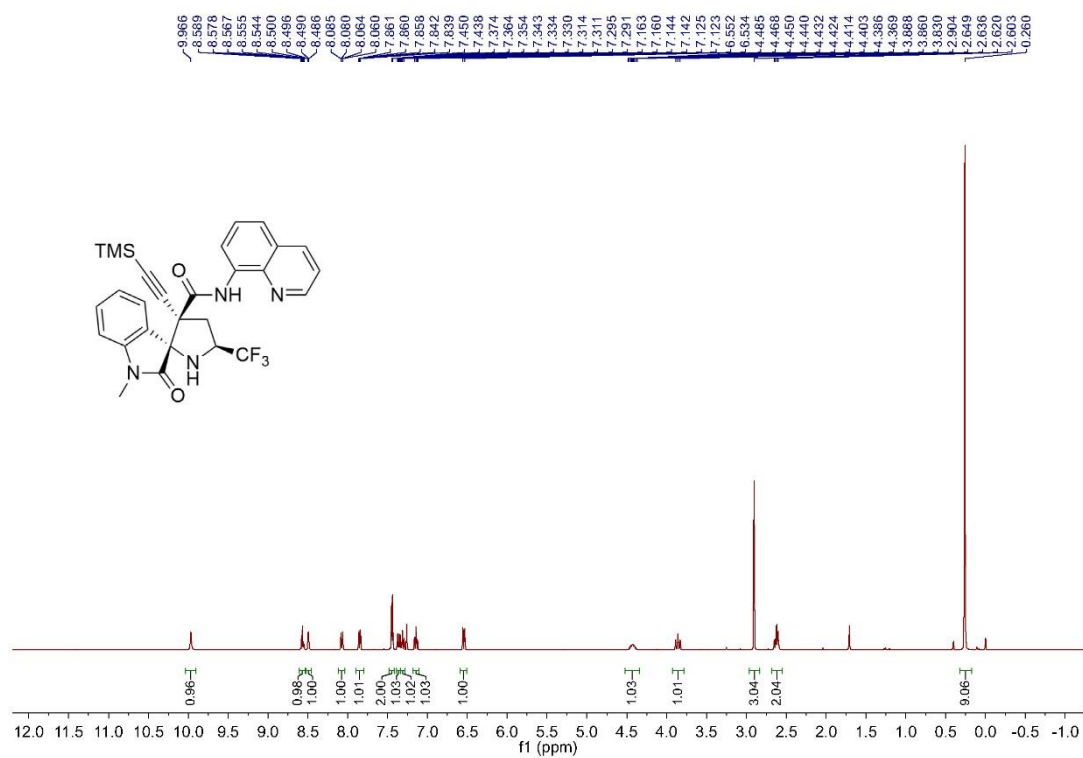

<sup>13</sup>C NMR spectrum of **3ua** in CDCl<sub>3</sub>, 101 MHz

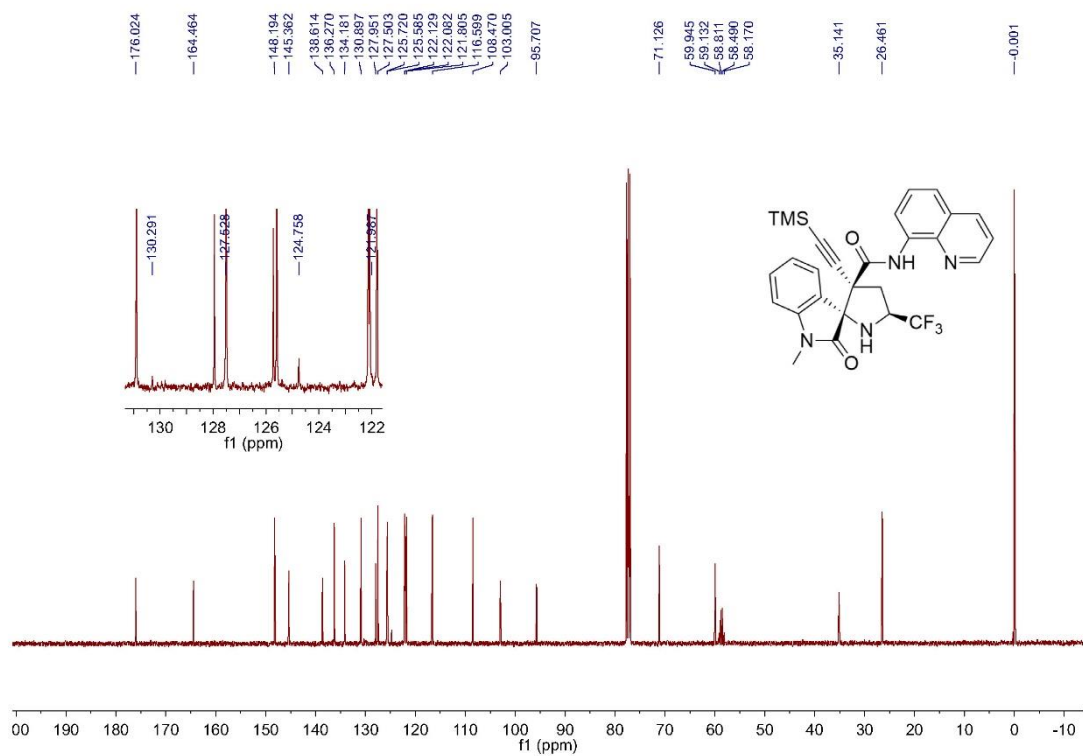

<sup>19</sup>F NMR spectrum of **3ua** in CDCl<sub>3</sub>, 376 MHz

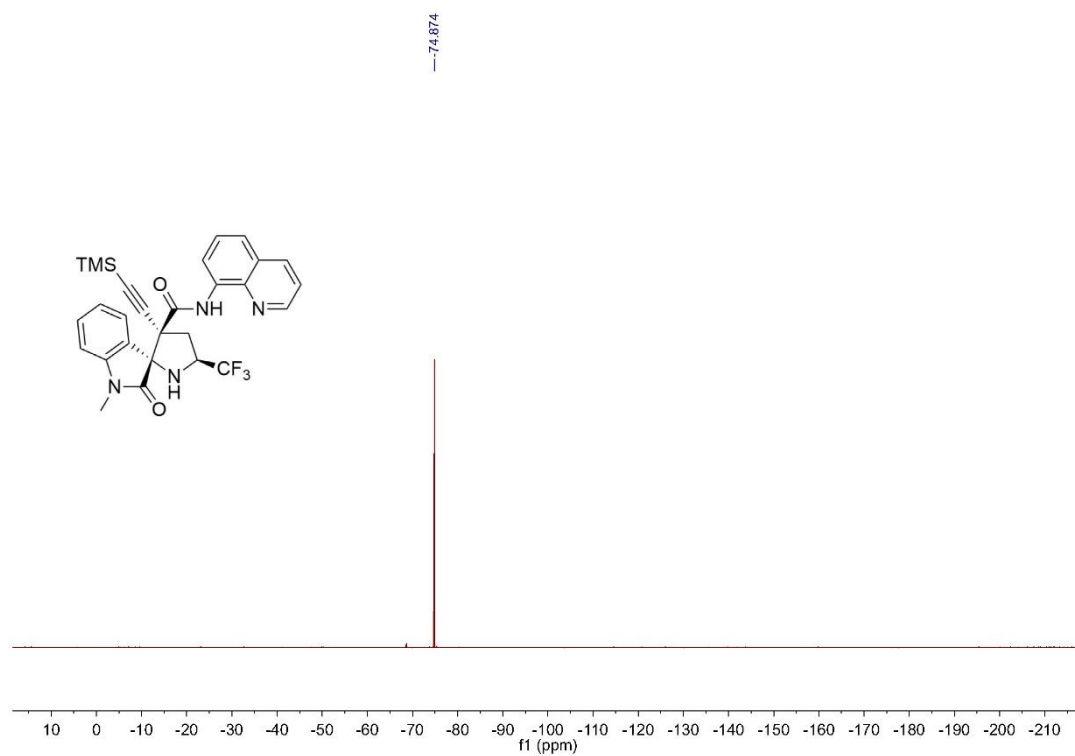

<sup>1</sup>H NMR spectrum of **3va** in CDCl<sub>3</sub>, 400 MHz

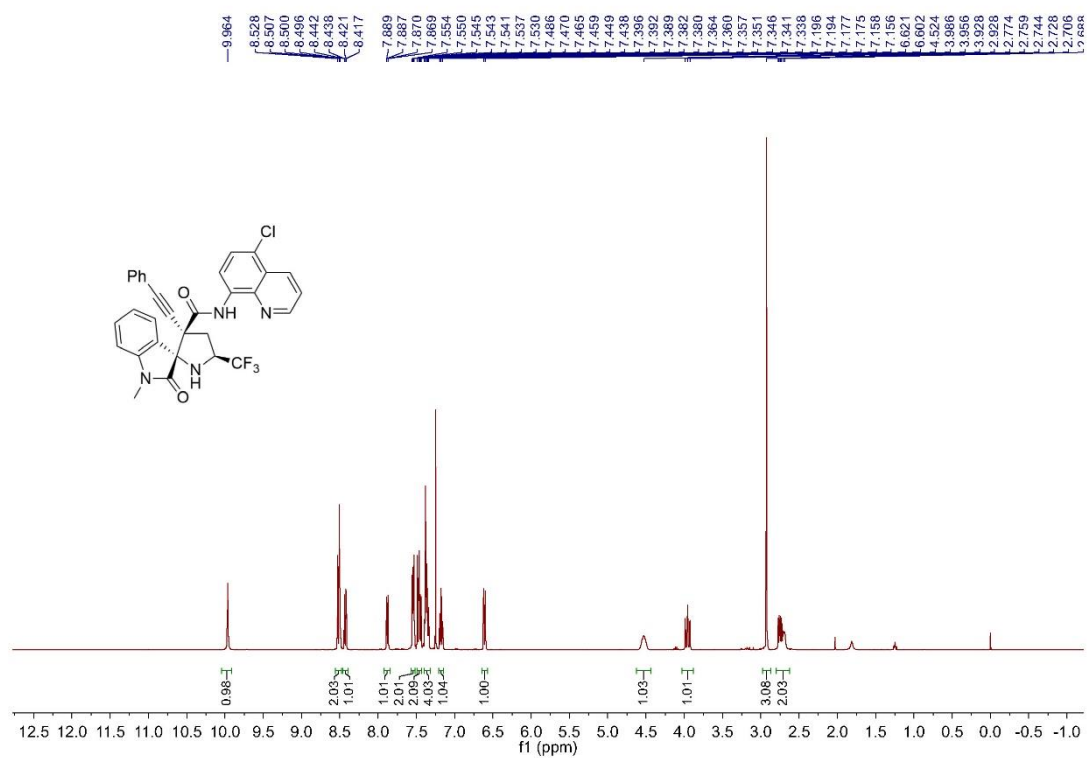

<sup>13</sup>C NMR spectrum of **3va** in CDCl<sub>3</sub>, 101 MHz

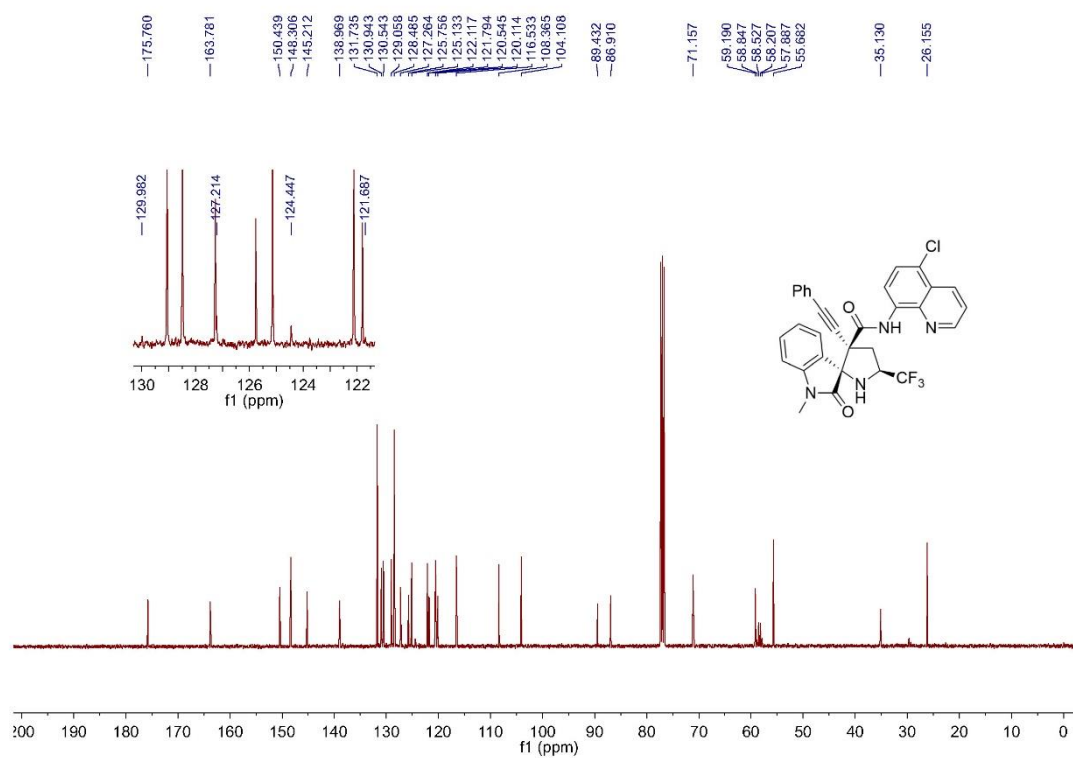

<sup>19</sup>F NMR spectrum of **3va** in CDCl<sub>3</sub>, 376 MHz

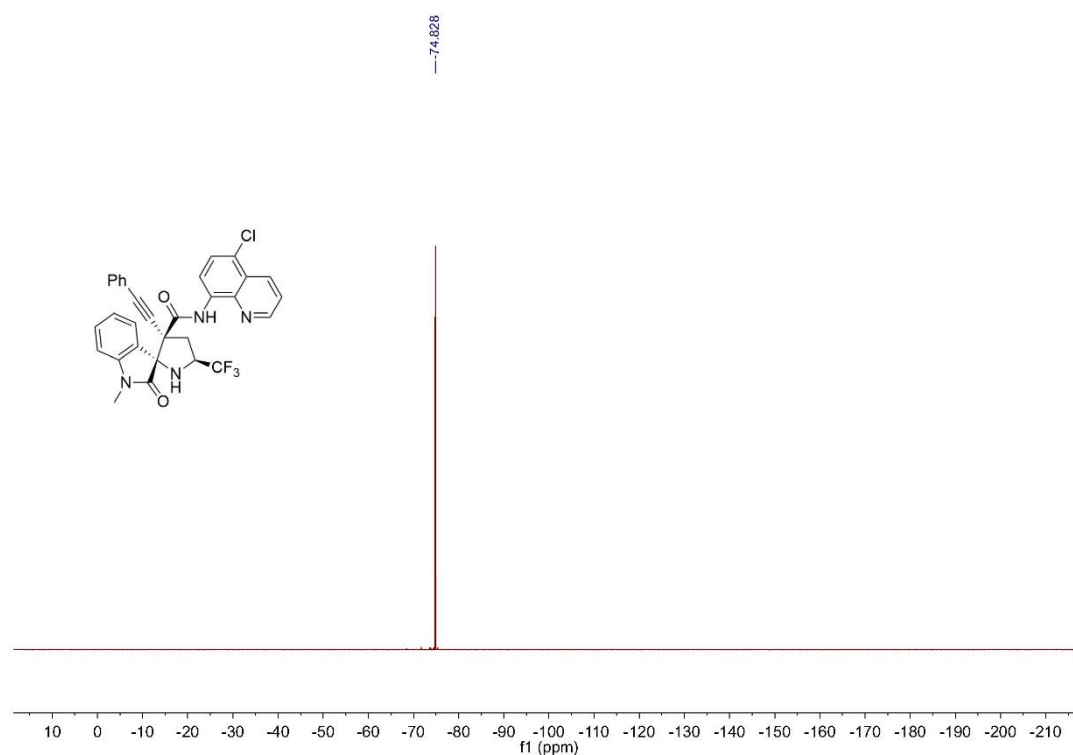

<sup>1</sup>H NMR spectrum of **3wa** in CDCl<sub>3</sub>, 400 MHz

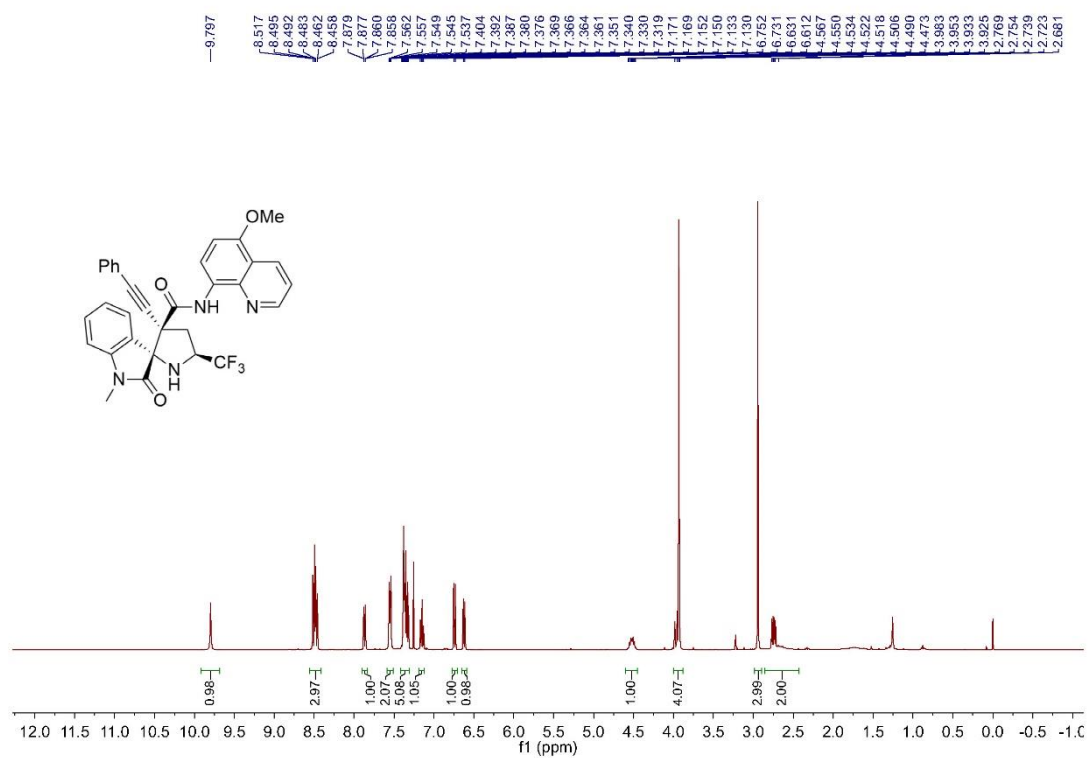

<sup>13</sup>C NMR spectrum of **3wa** in CDCl<sub>3</sub>, 101 MHz

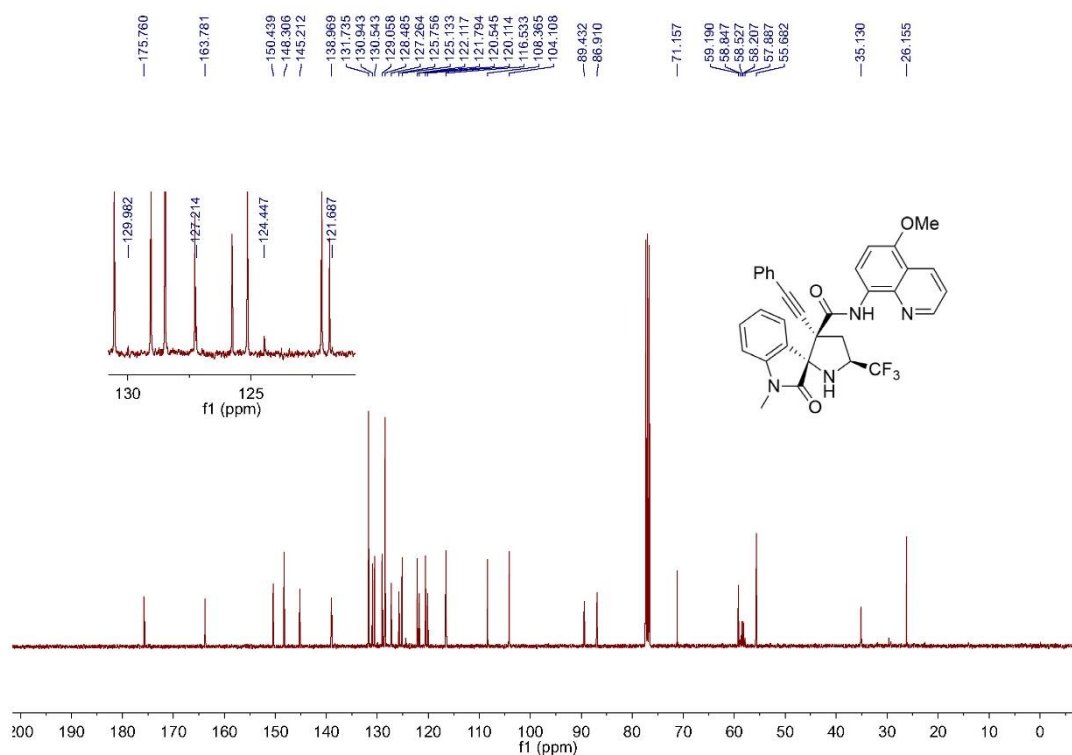

<sup>19</sup>F NMR spectrum of **3wa** in CDCl<sub>3</sub>, 376 MHz

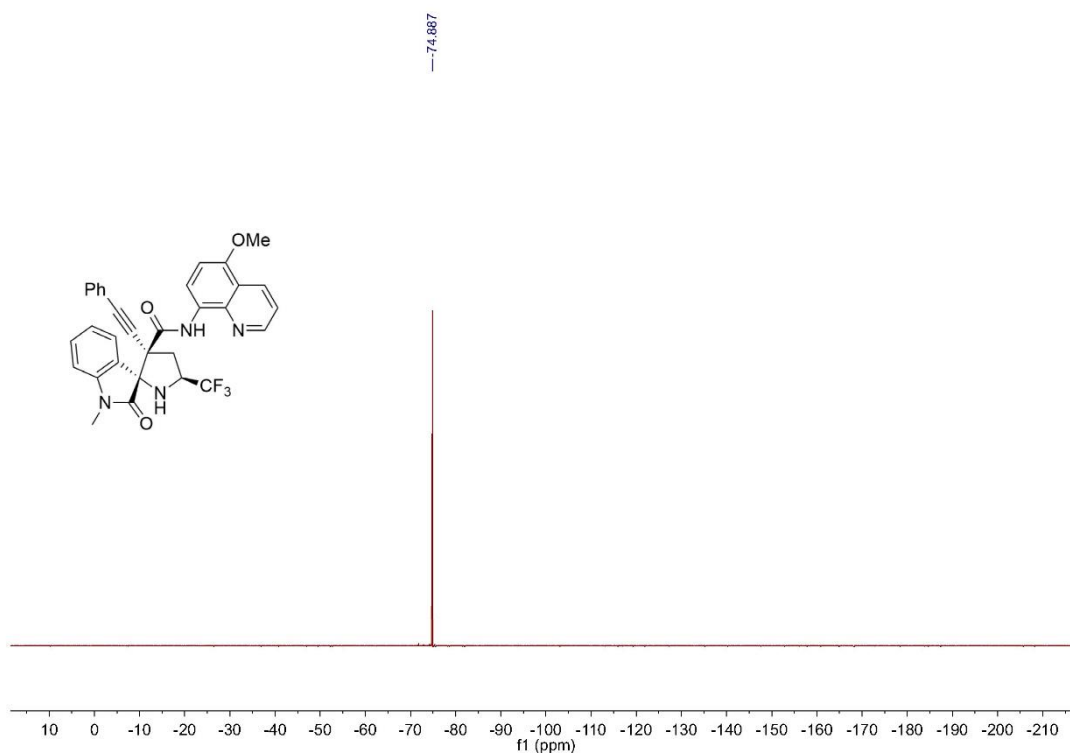

<sup>1</sup>H NMR spectrum of **3xa** in CDCl<sub>3</sub>, 400 MHz

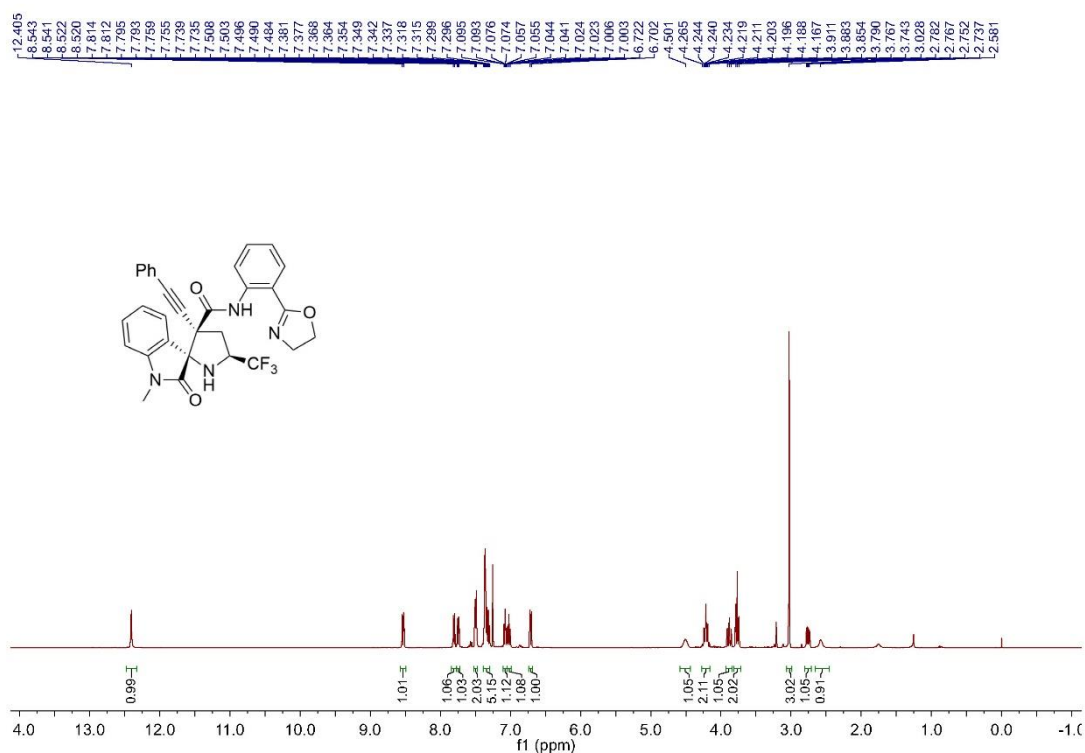

<sup>13</sup>C NMR spectrum of **3xa** in CDCl<sub>3</sub>, 101 MHz

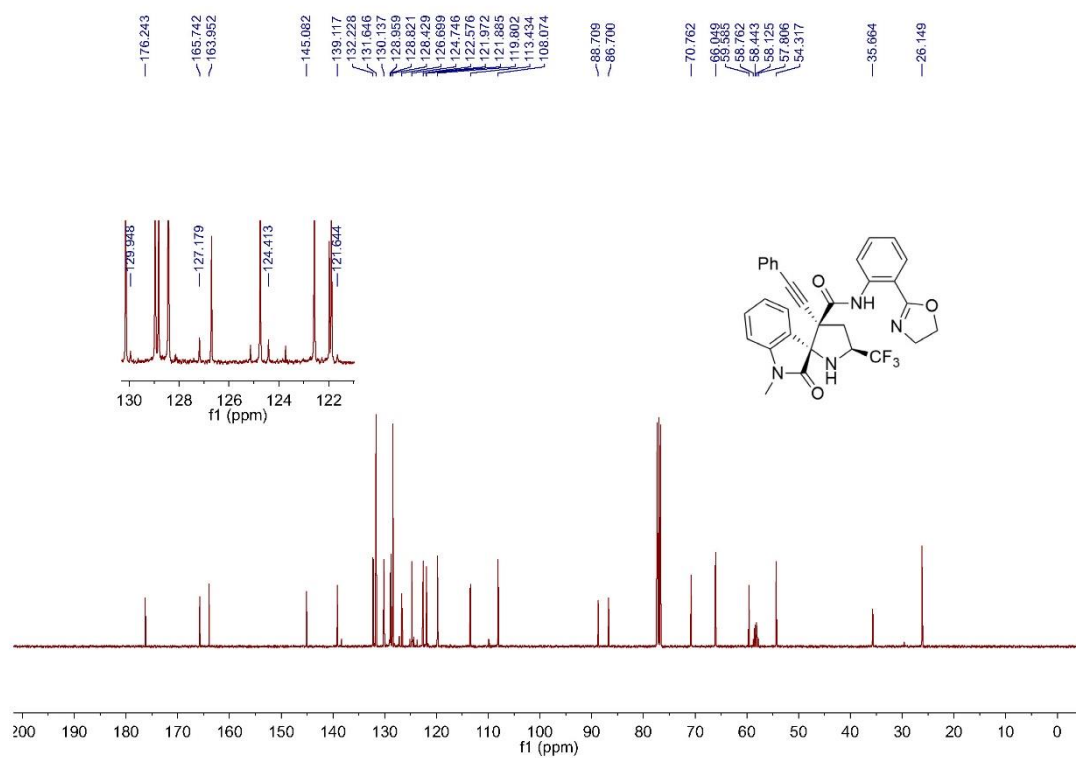

<sup>19</sup>F NMR spectrum of **3xa** in CDCl<sub>3</sub>, 376 MHz

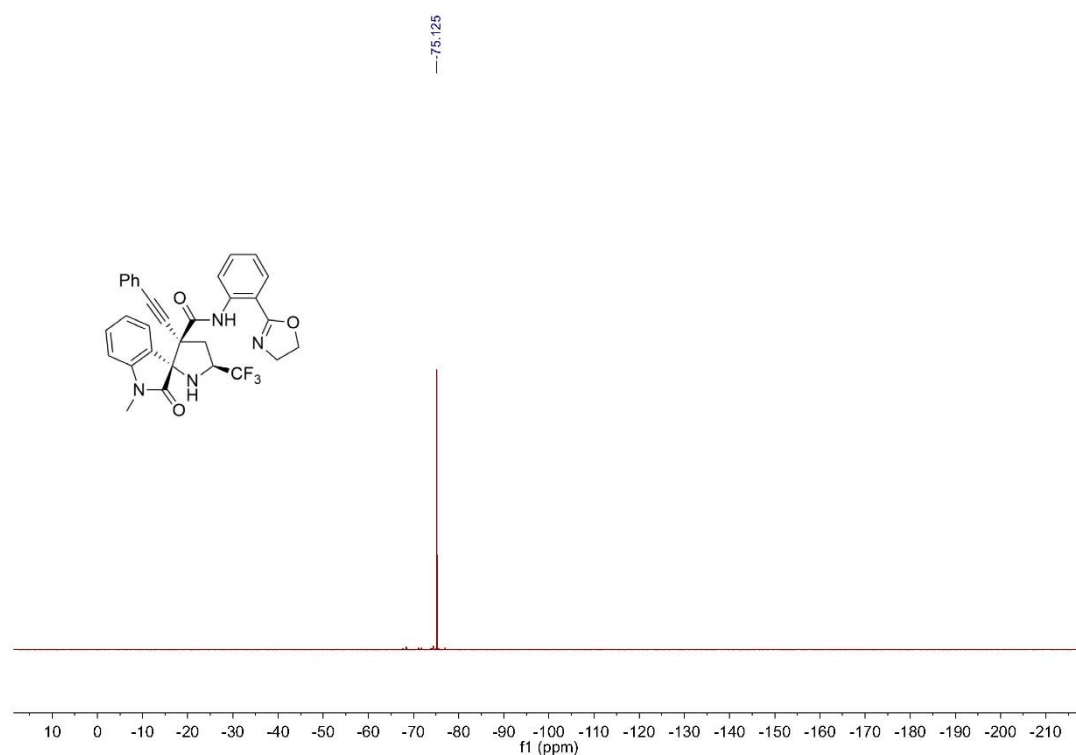



<sup>1</sup>H NMR spectrum of **3ab** in CDCl<sub>3</sub>, 400 MHz

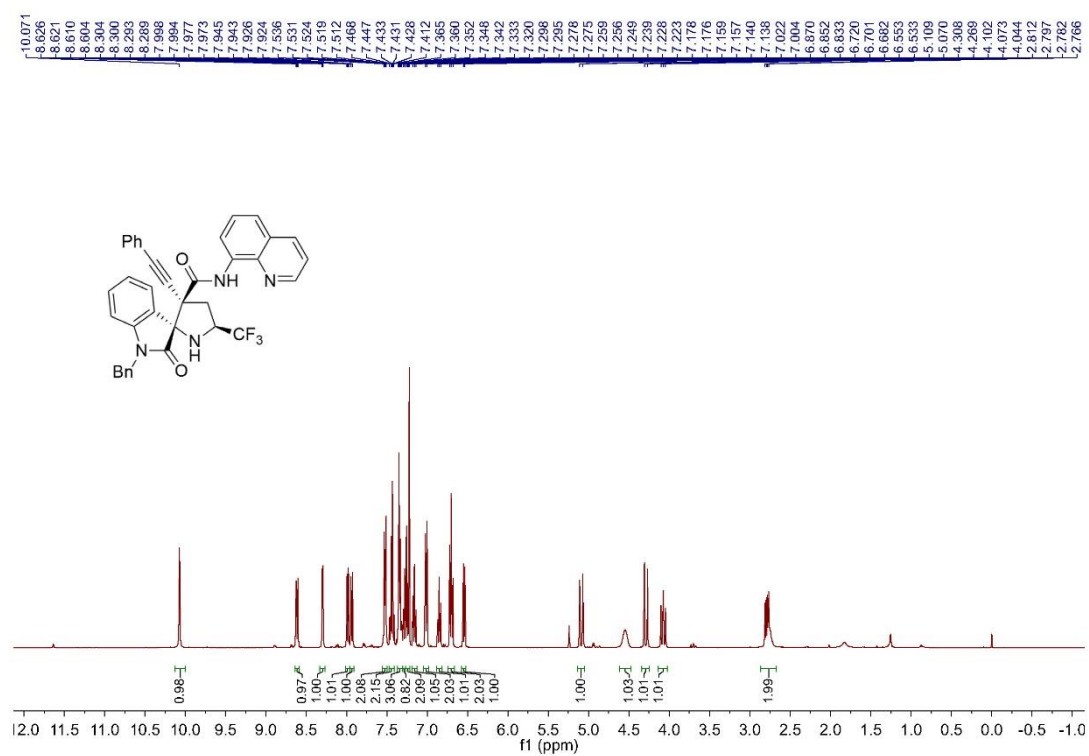

<sup>13</sup>C NMR spectrum of **3ab** in CDCl<sub>3</sub>, 101 MHz

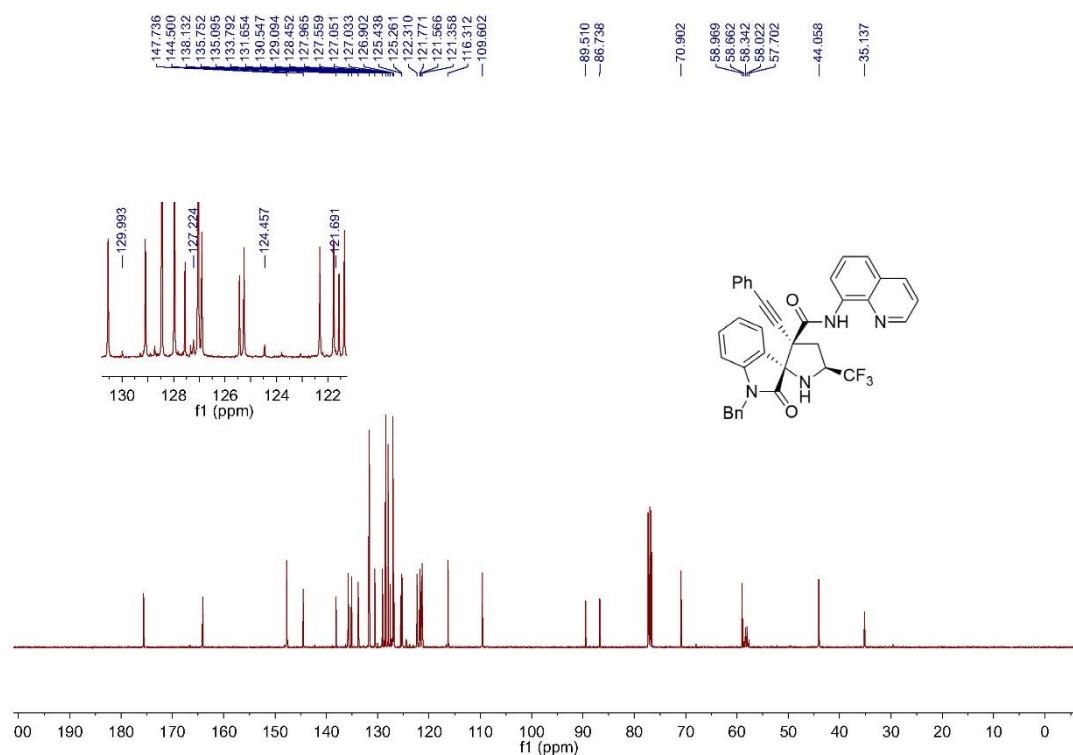

<sup>19</sup>F NMR spectrum of **3ab** in CDCl<sub>3</sub>, 376 MHz

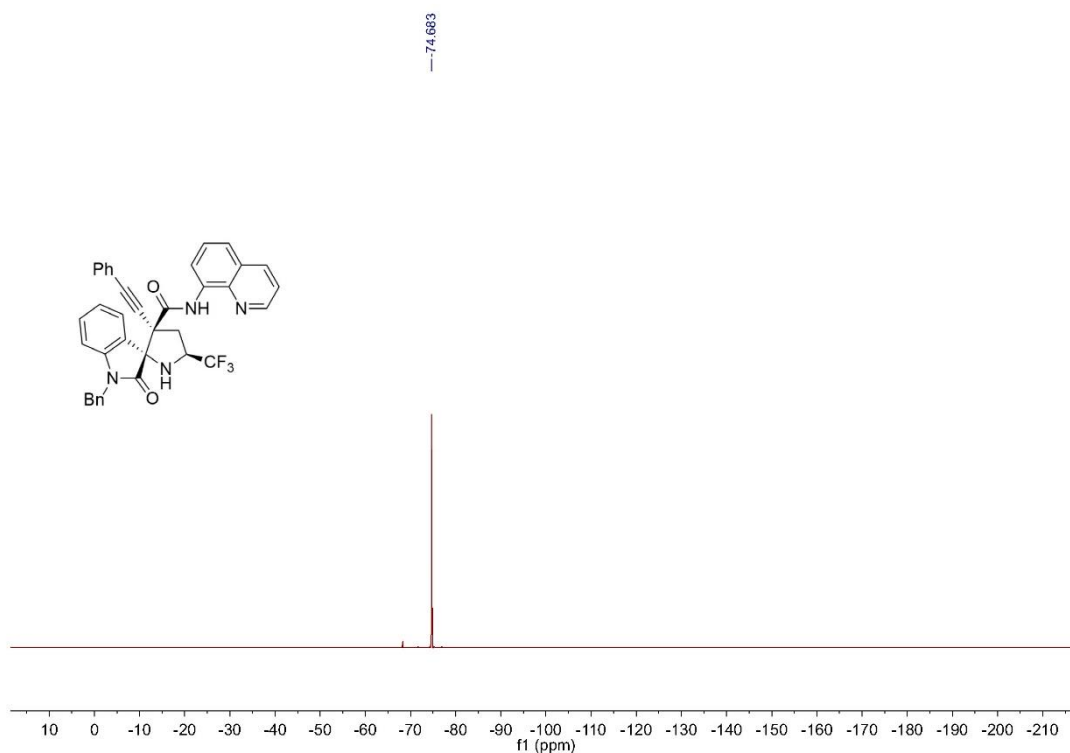

<sup>1</sup>H NMR spectrum of **3ac** in CDCl<sub>3</sub>, 400 MHz

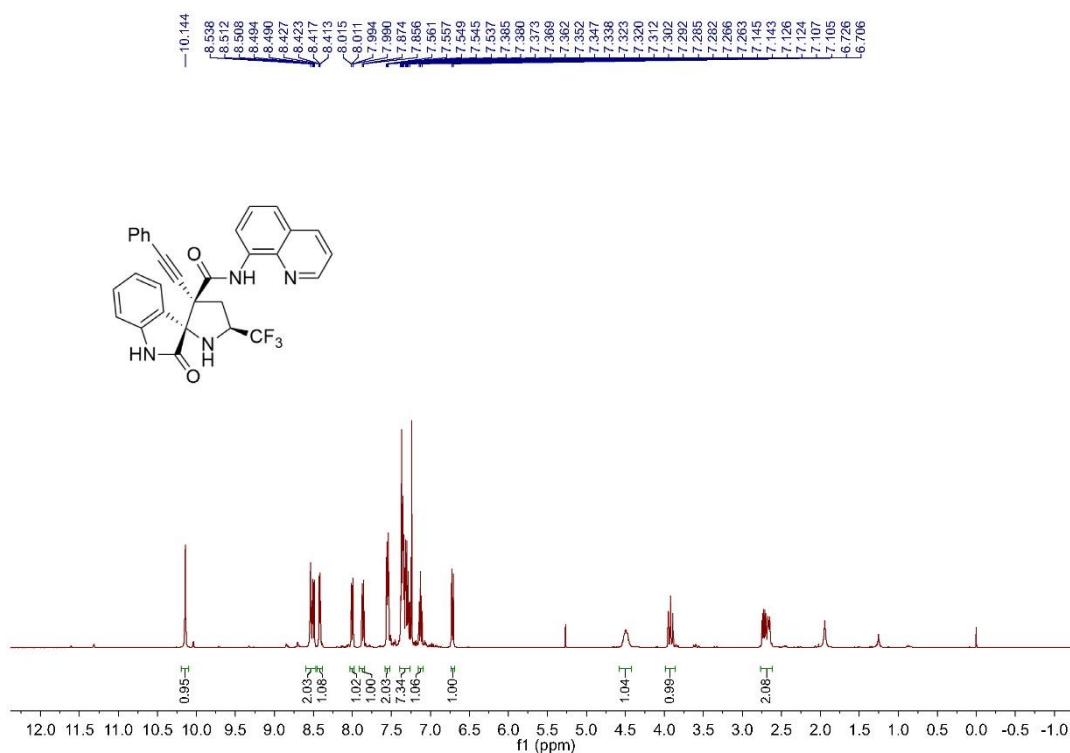

<sup>13</sup>C NMR spectrum of **3ac** in CDCl<sub>3</sub>, 101 MHz

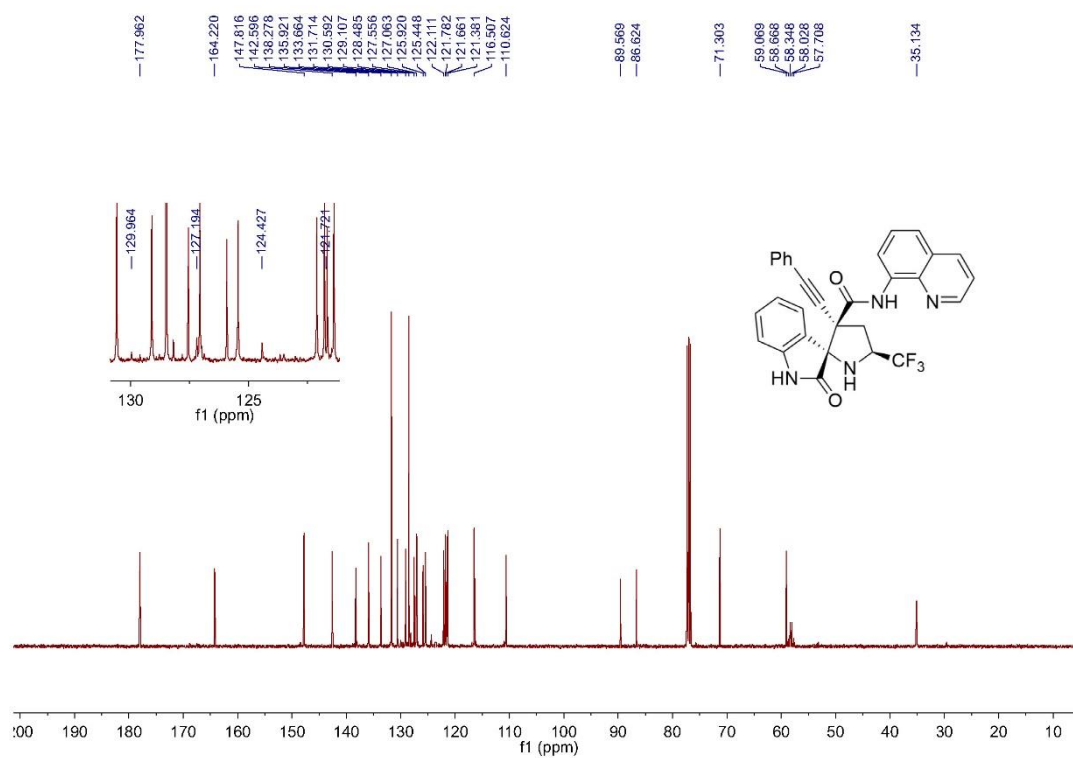

<sup>19</sup>F NMR spectrum of **3ac** in CDCl<sub>3</sub>, 376 MHz

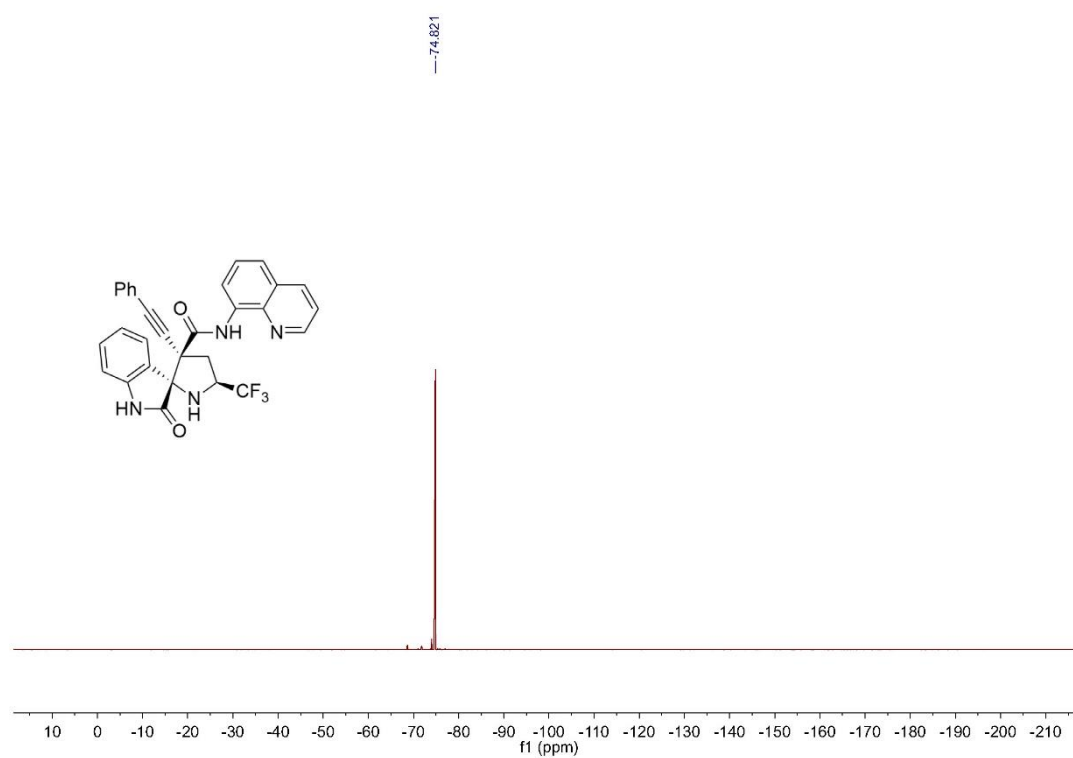

<sup>1</sup>H NMR spectrum of **3ad** in CDCl<sub>3</sub>, 400 MHz

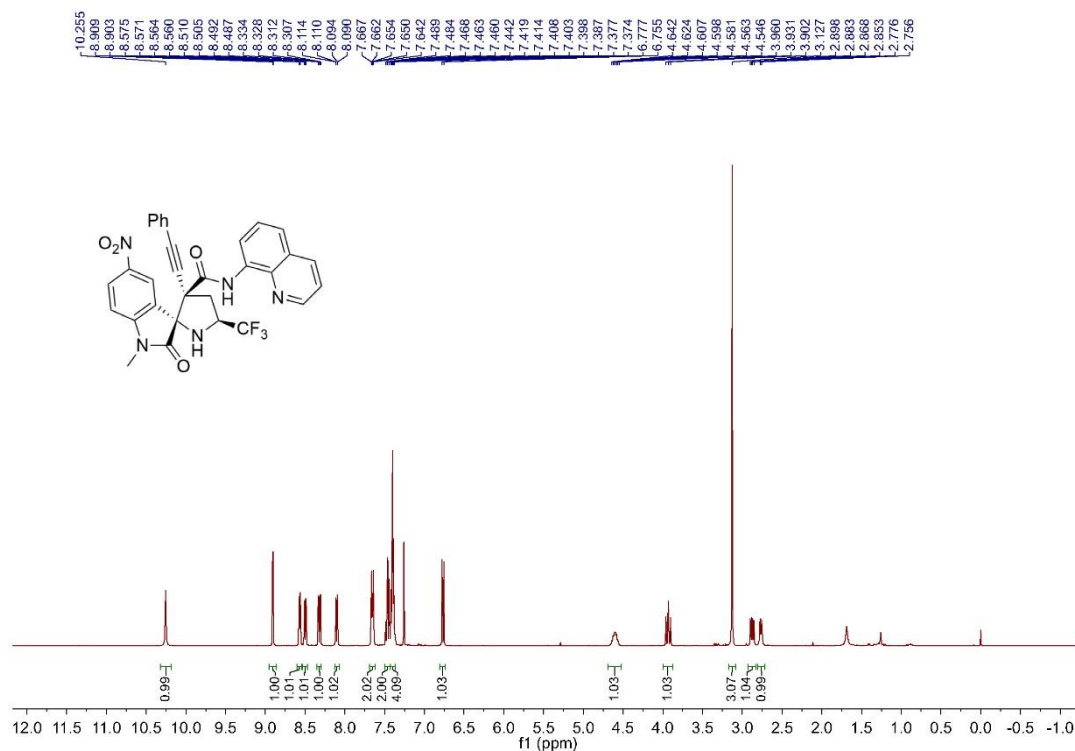

<sup>13</sup>C NMR spectrum of **3ad** in CDCl<sub>3</sub>, 101 MHz

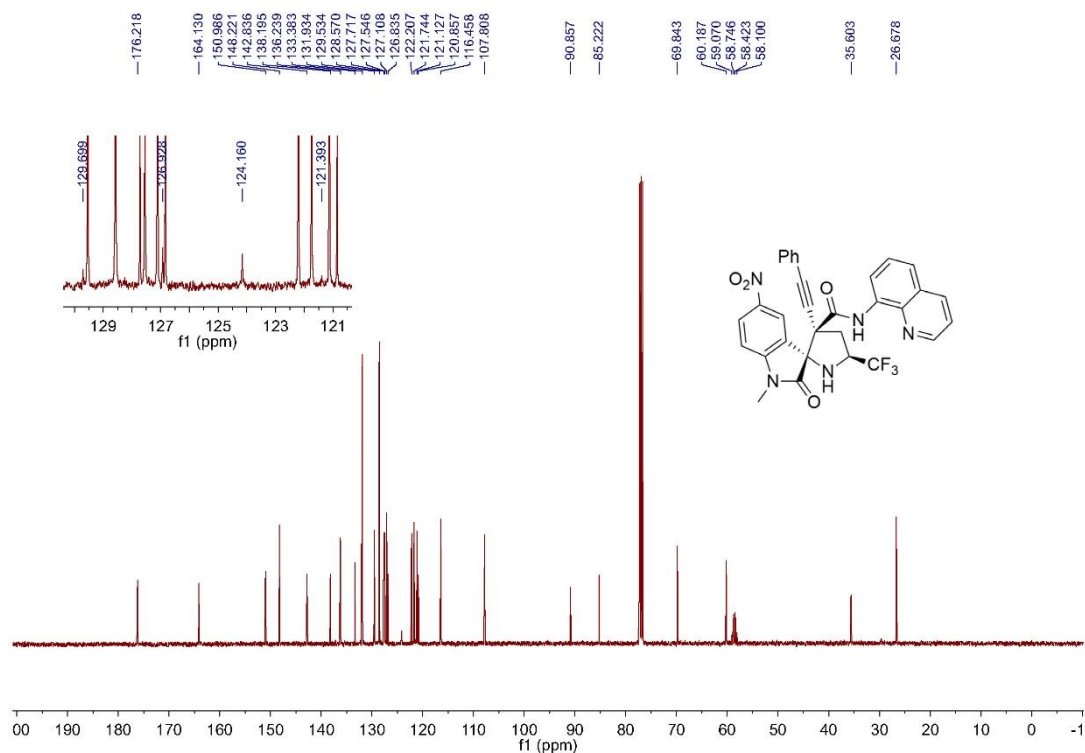

<sup>19</sup>F NMR spectrum of **3ad** in CDCl<sub>3</sub>, 400 MHz

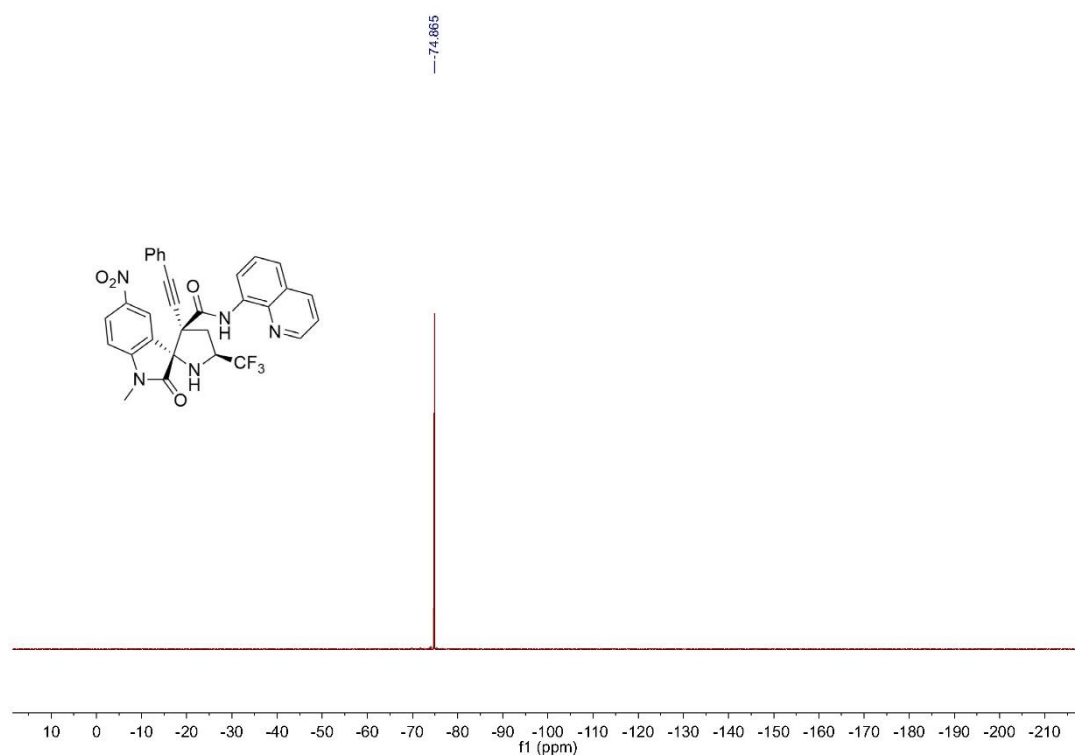

<sup>1</sup>H NMR spectrum of **3ae** in CDCl<sub>3</sub>, 400 MHz

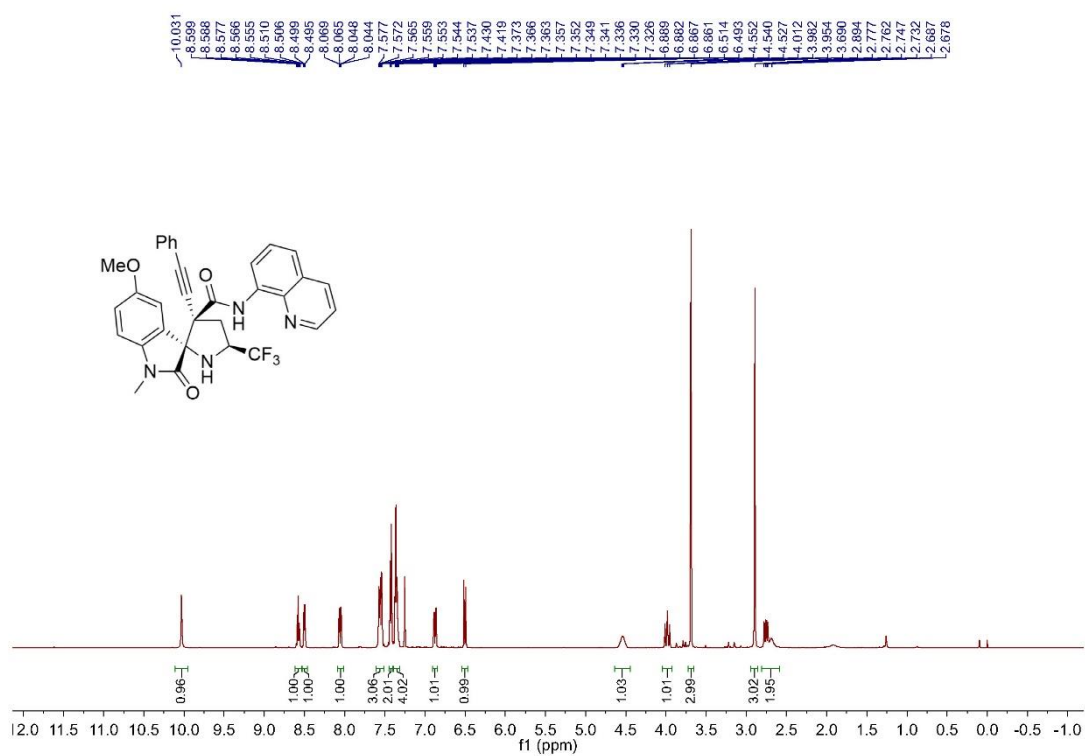

<sup>13</sup>C NMR spectrum of **3ae** in CDCl<sub>3</sub>, 101 MHz

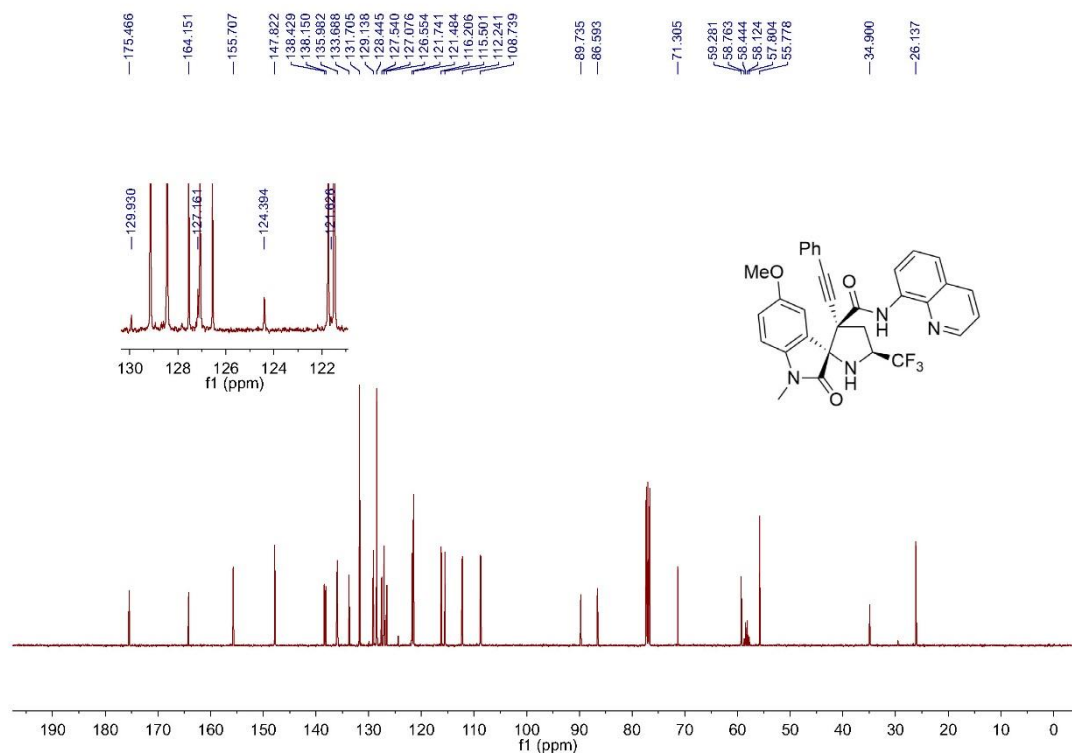

<sup>19</sup>F NMR spectrum of **3ae** in CDCl<sub>3</sub>, 376 MHz

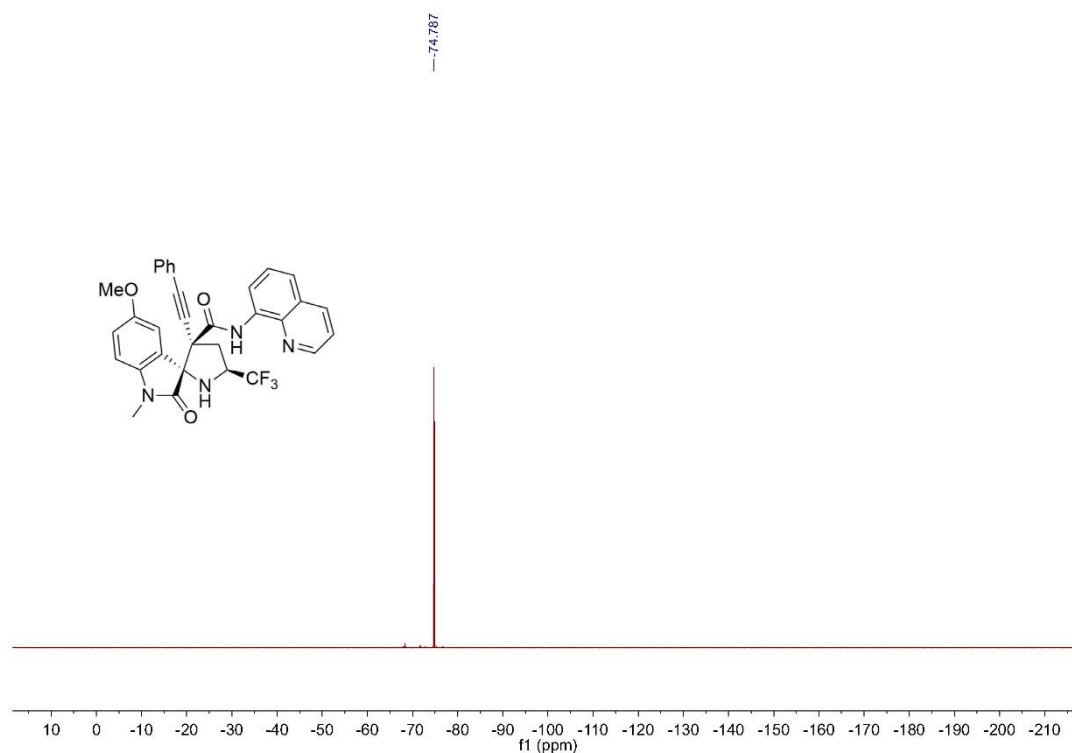

<sup>1</sup>H NMR spectrum of **3af** in CDCl<sub>3</sub>, 400 MHz

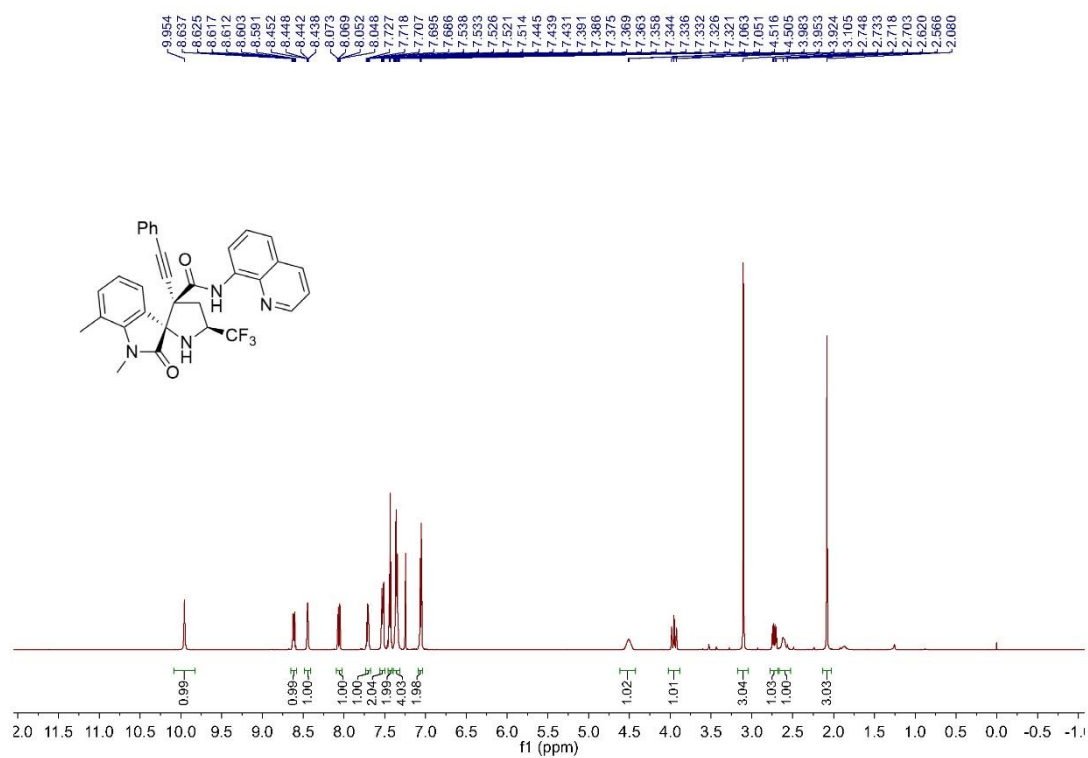

<sup>13</sup>C NMR spectrum of **3af** in CDCl<sub>3</sub>, 101 MHz

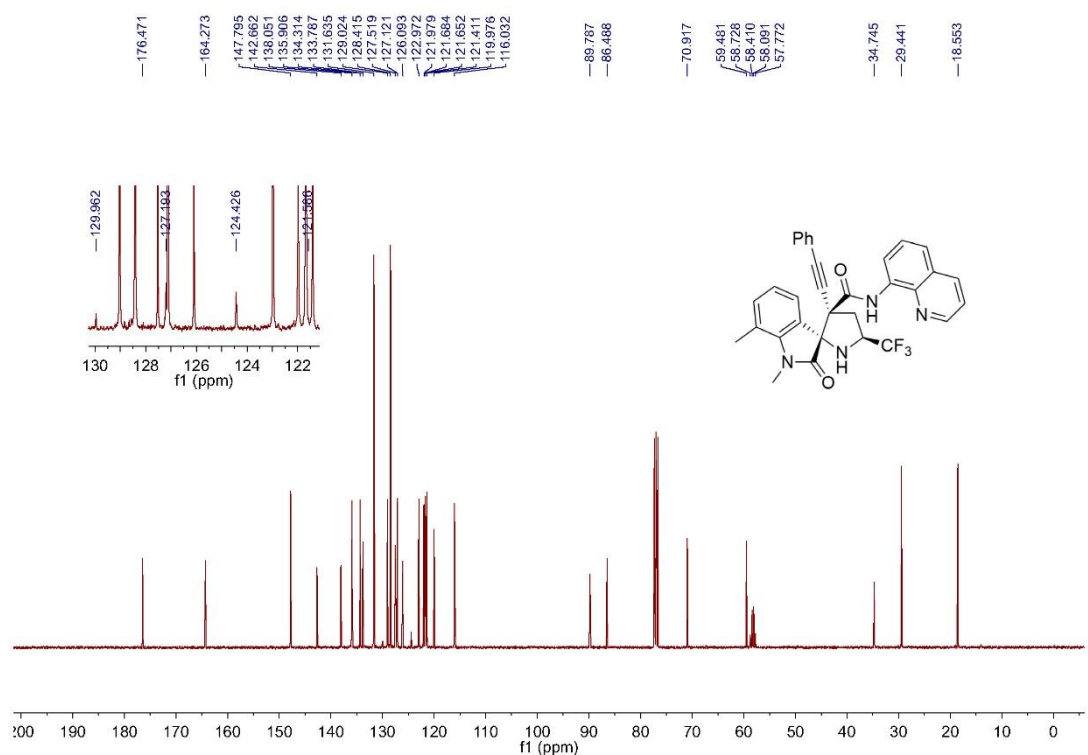

<sup>19</sup>F NMR spectrum of **3af** in CDCl<sub>3</sub>, 376 MHz

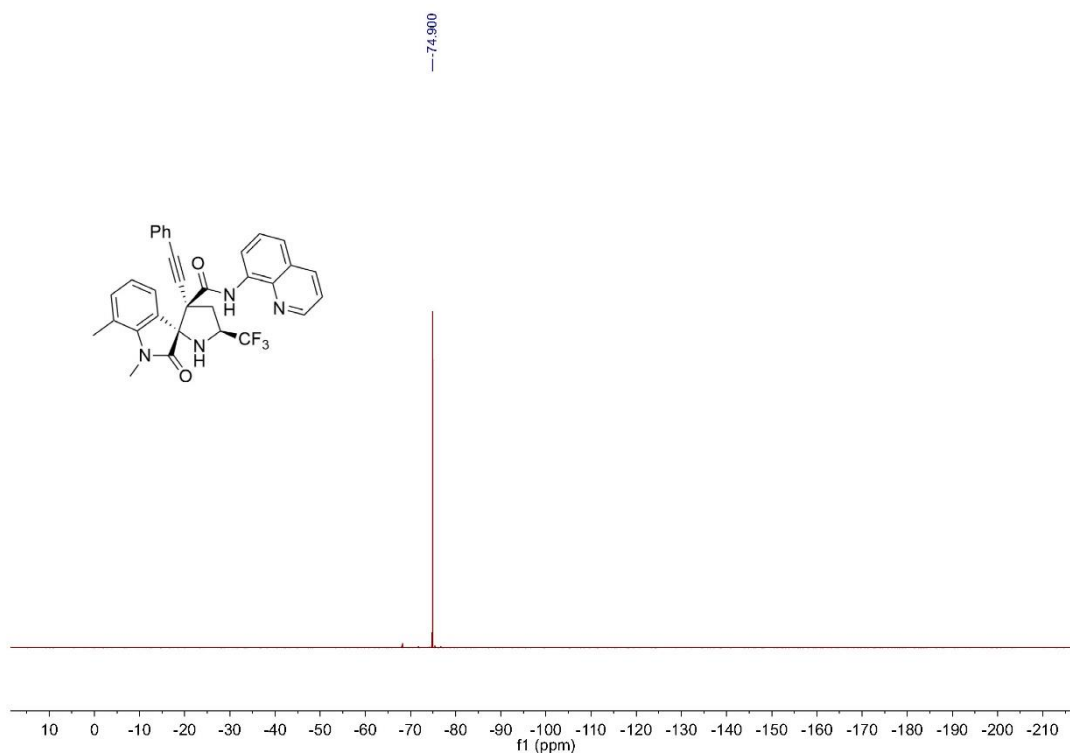

<sup>1</sup>H NMR spectrum of **3ag** in CDCl<sub>3</sub>, 400 MHz

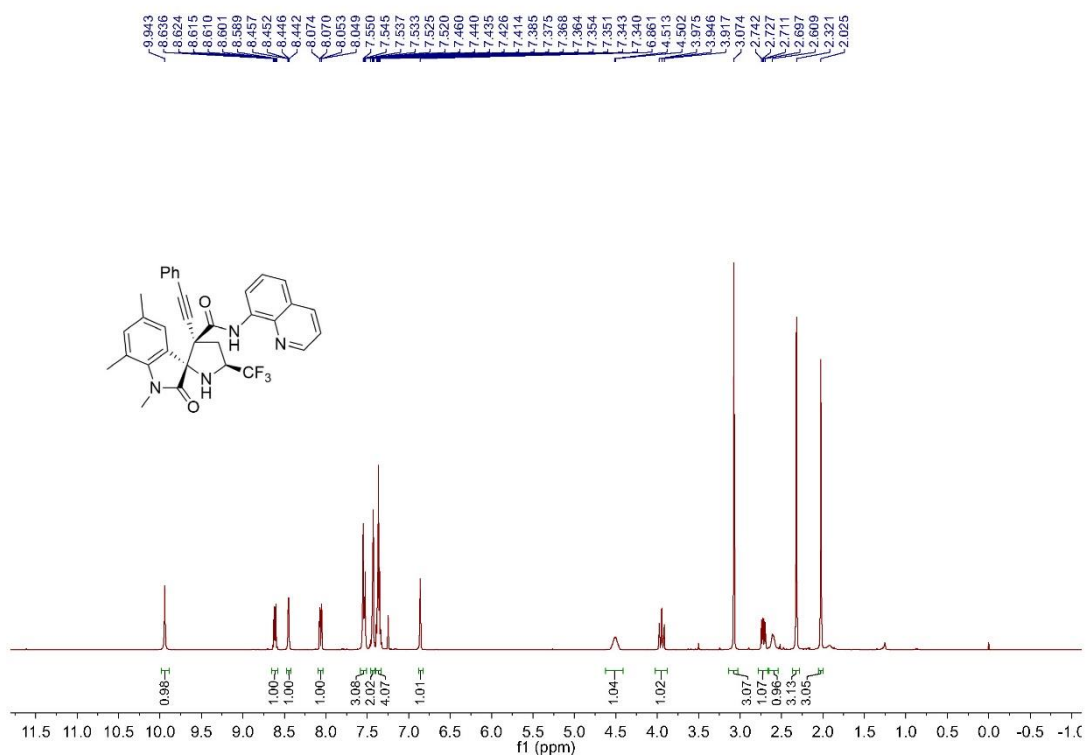



<sup>13</sup>C NMR spectrum of **3ag** in CDCl<sub>3</sub>, 400 MHz

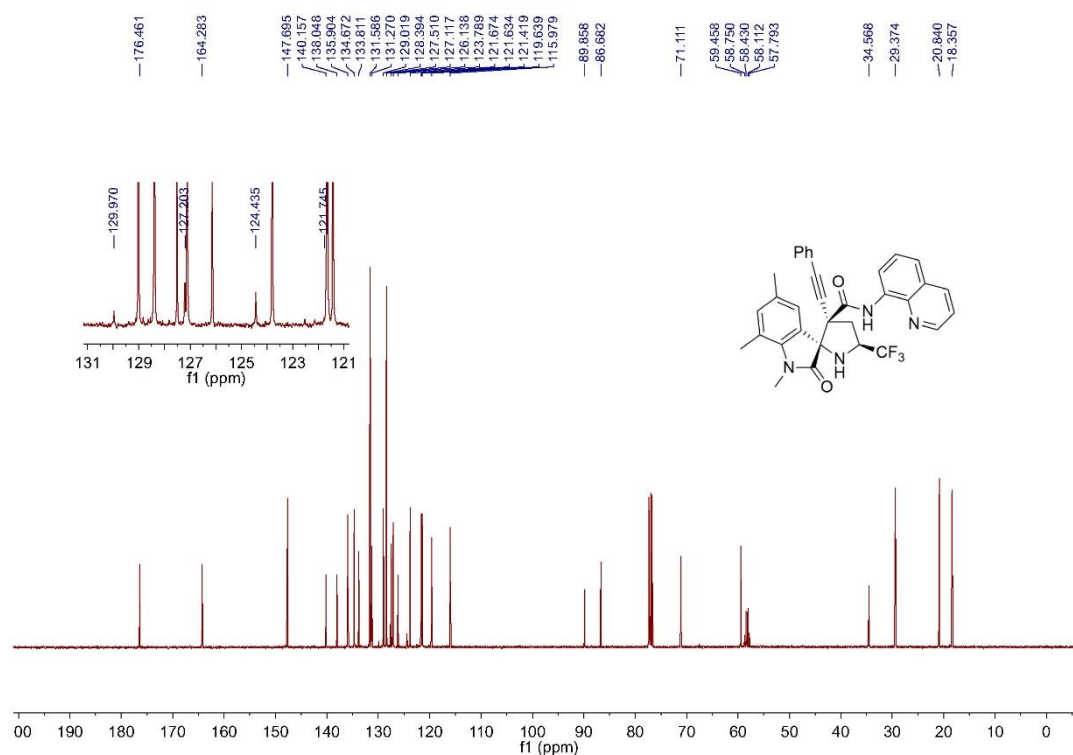

<sup>19</sup>F NMR spectrum of **3ag** in CDCl<sub>3</sub>, 376 MHz

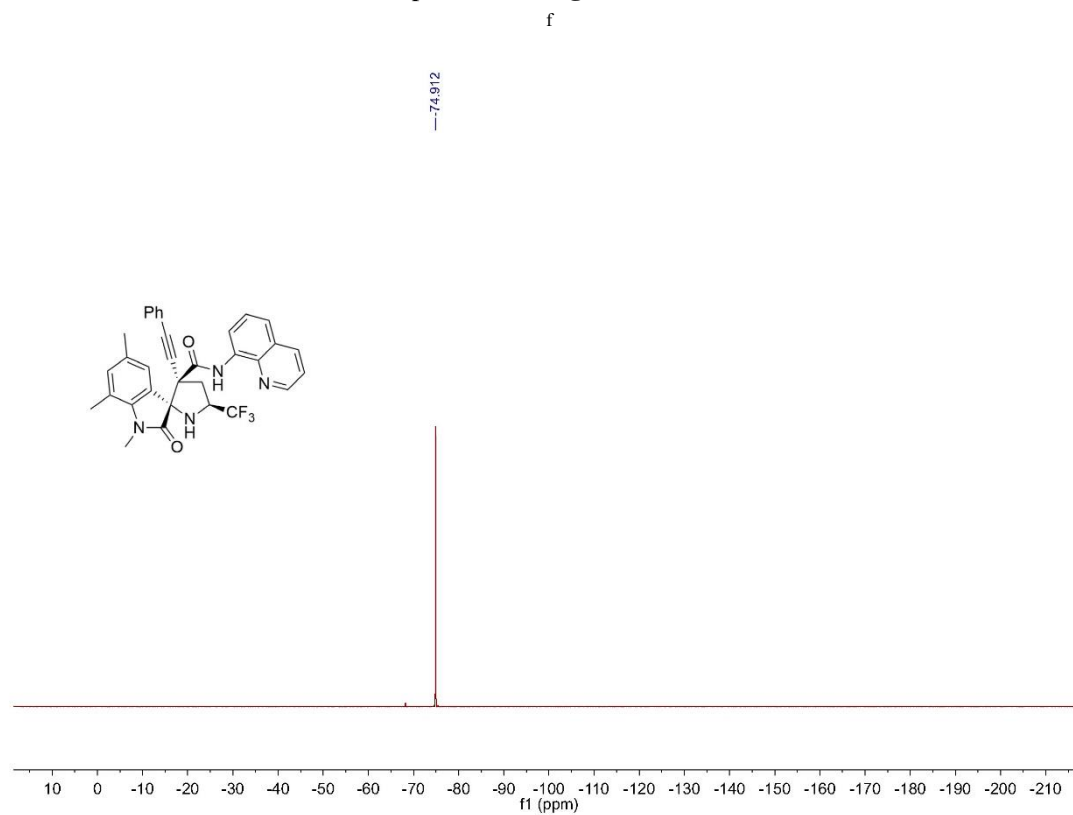

<sup>1</sup>H NMR spectrum of **3ya** in CDCl<sub>3</sub>, 400 MHz

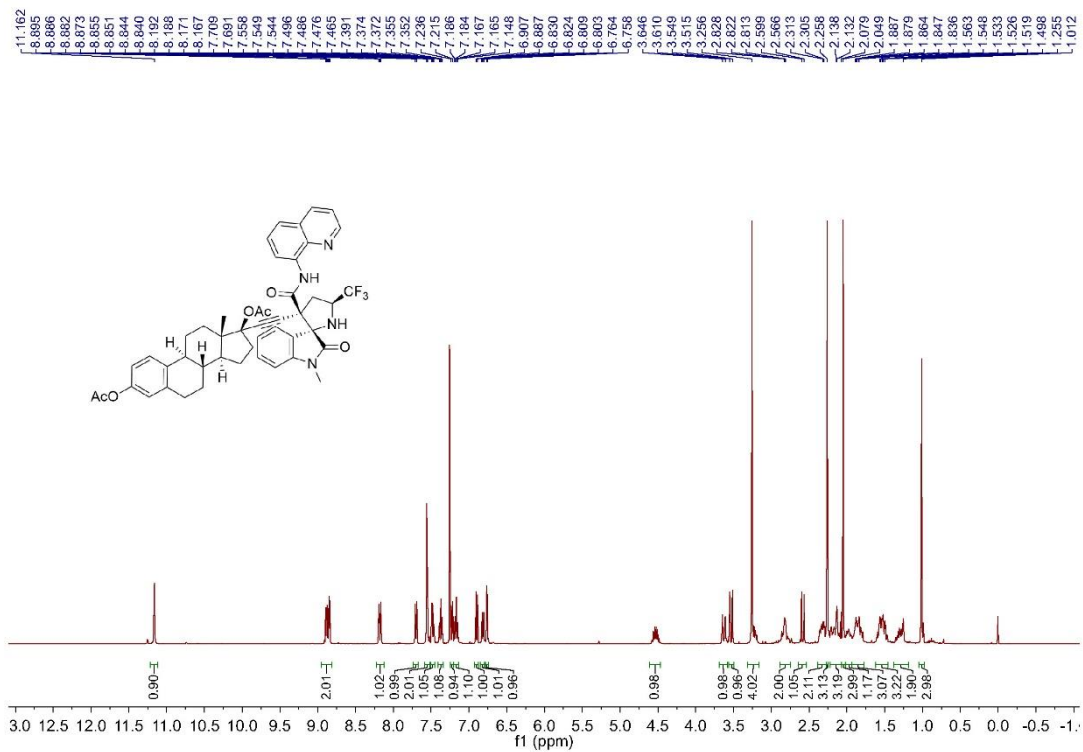

<sup>13</sup>C NMR spectrum of **3ya** in CDCl<sub>3</sub>, 101 MHz

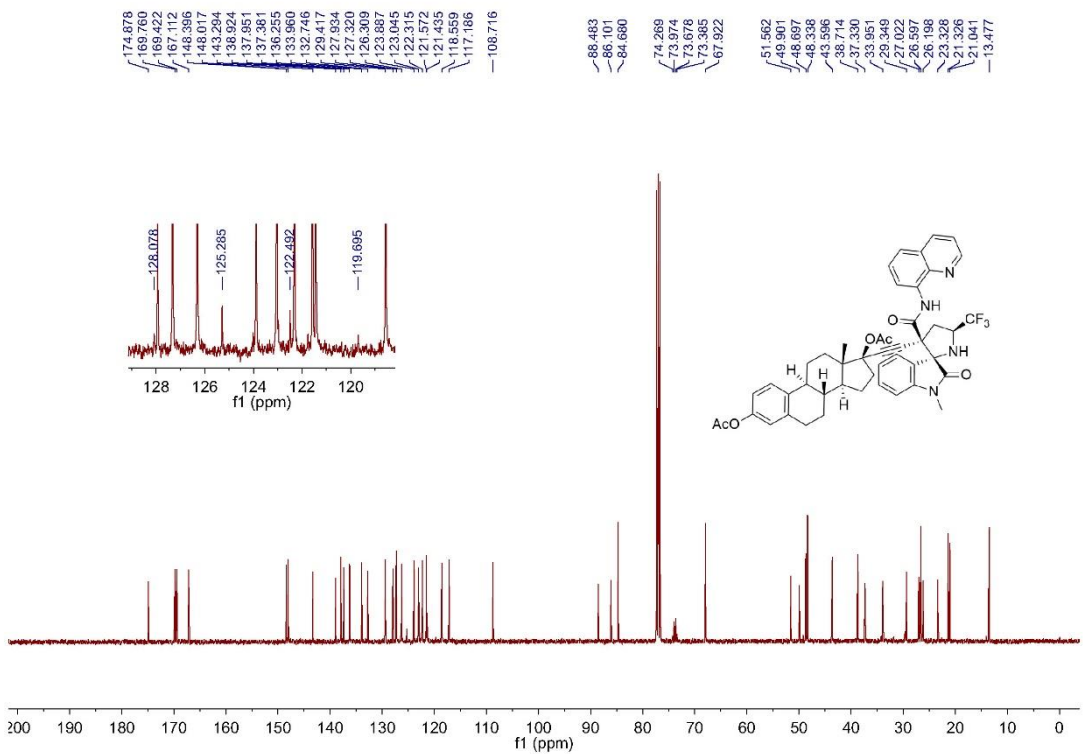

<sup>19</sup>F NMR spectrum of **3ya** in CDCl<sub>3</sub>, 376 MHz

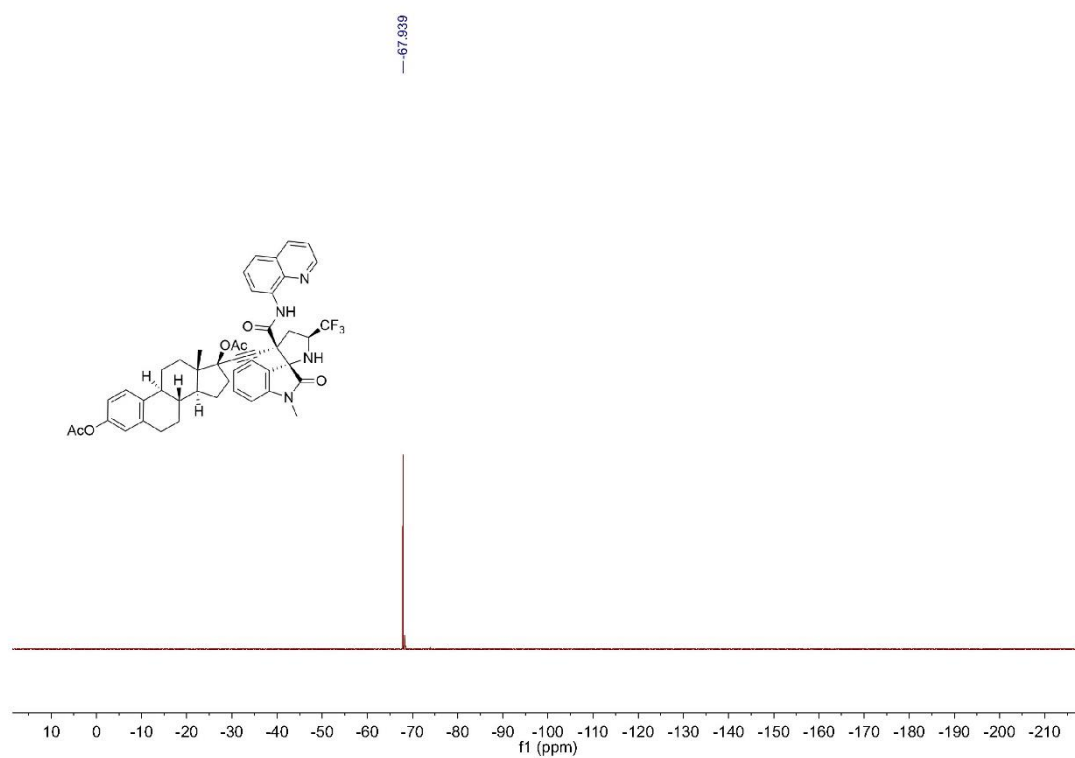

<sup>1</sup>H NMR spectrum of **4aa** in CDCl<sub>3</sub>, 500 MHz

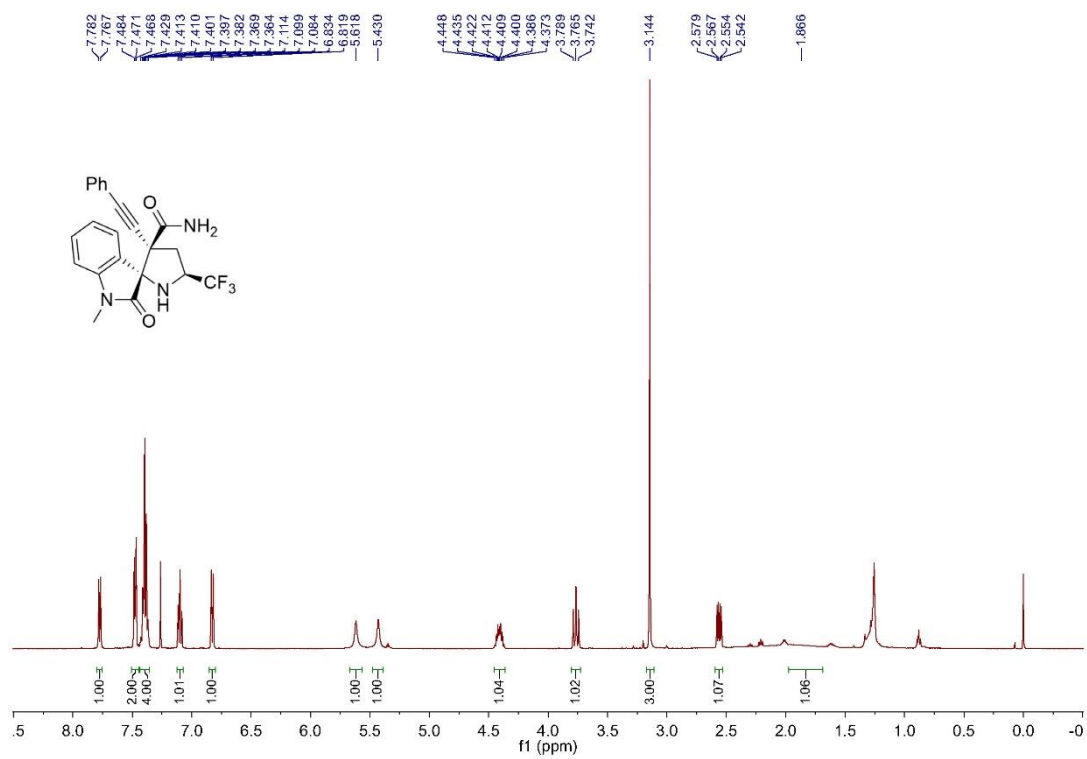

<sup>13</sup>C NMR spectrum of **4aa** in CDCl<sub>3</sub>, 126 MHz

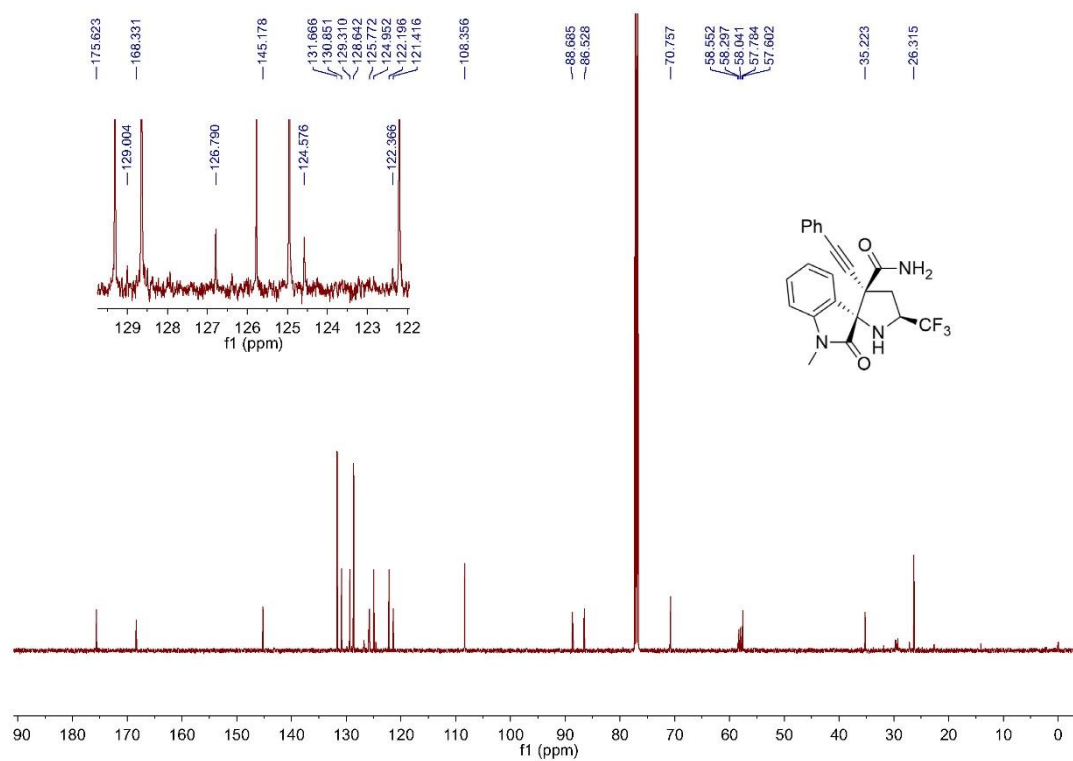

<sup>19</sup>F NMR spectrum of **4aa** in CDCl<sub>3</sub>, 376 MHz

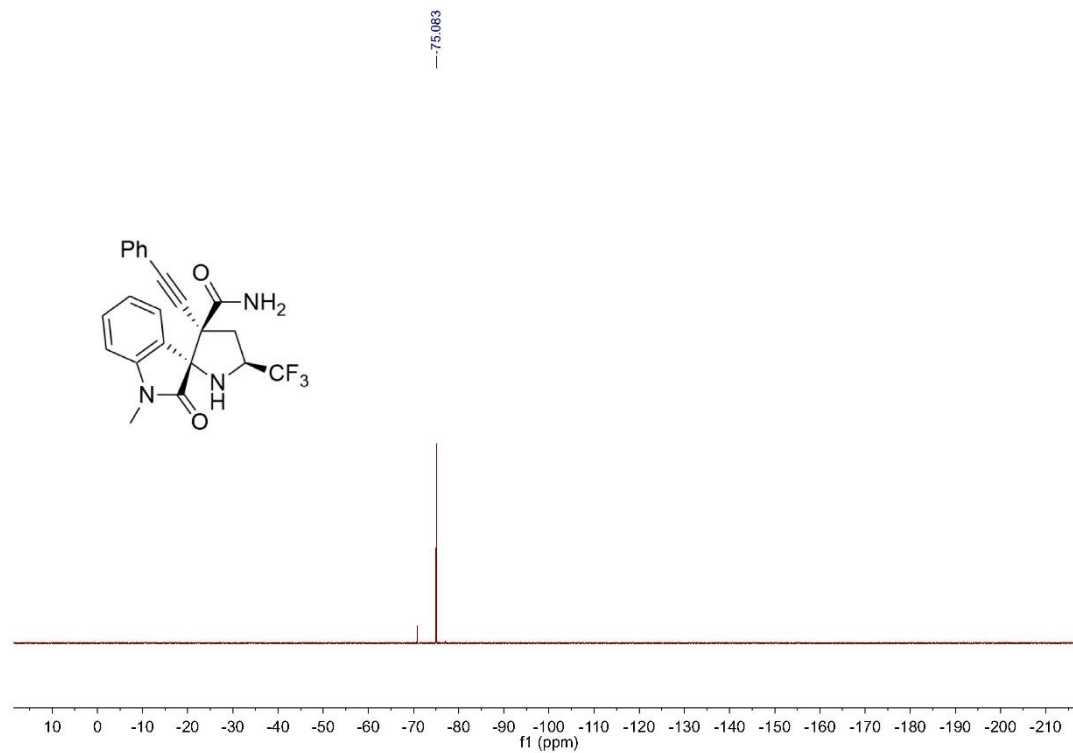

<sup>1</sup>H NMR spectrum of **5aa** in CDCl<sub>3</sub>, 400 MHz

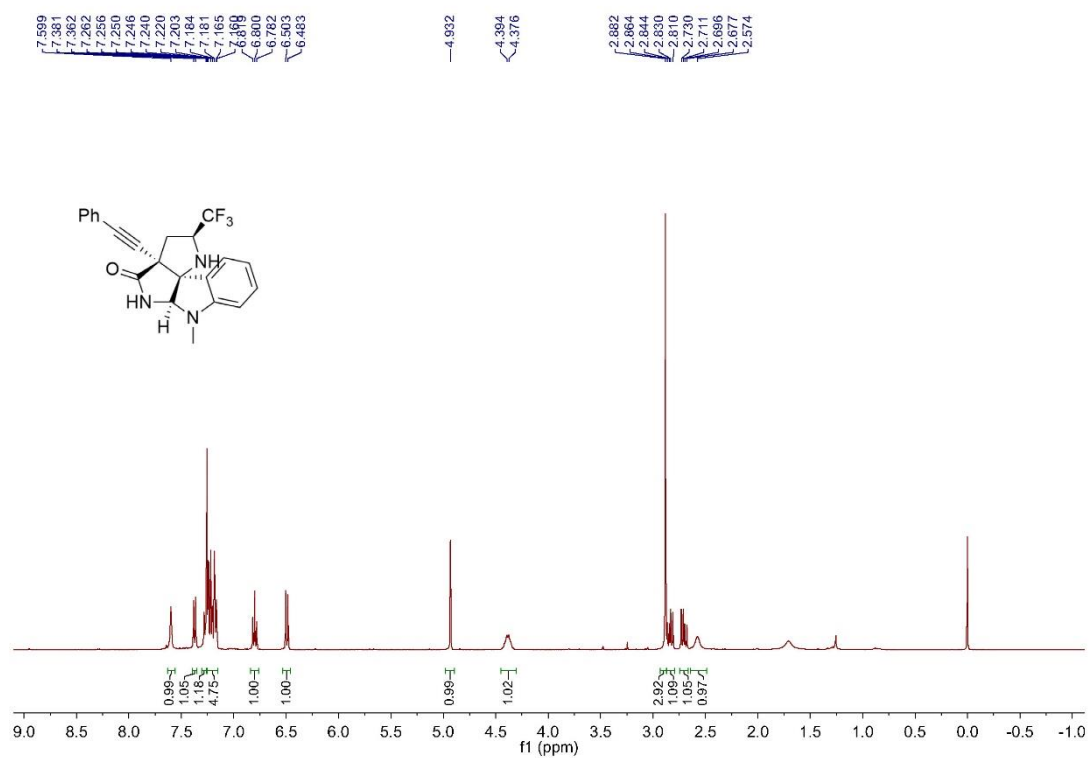

<sup>13</sup>C NMR spectrum of **5aa** in CDCl<sub>3</sub>, 101 MHz

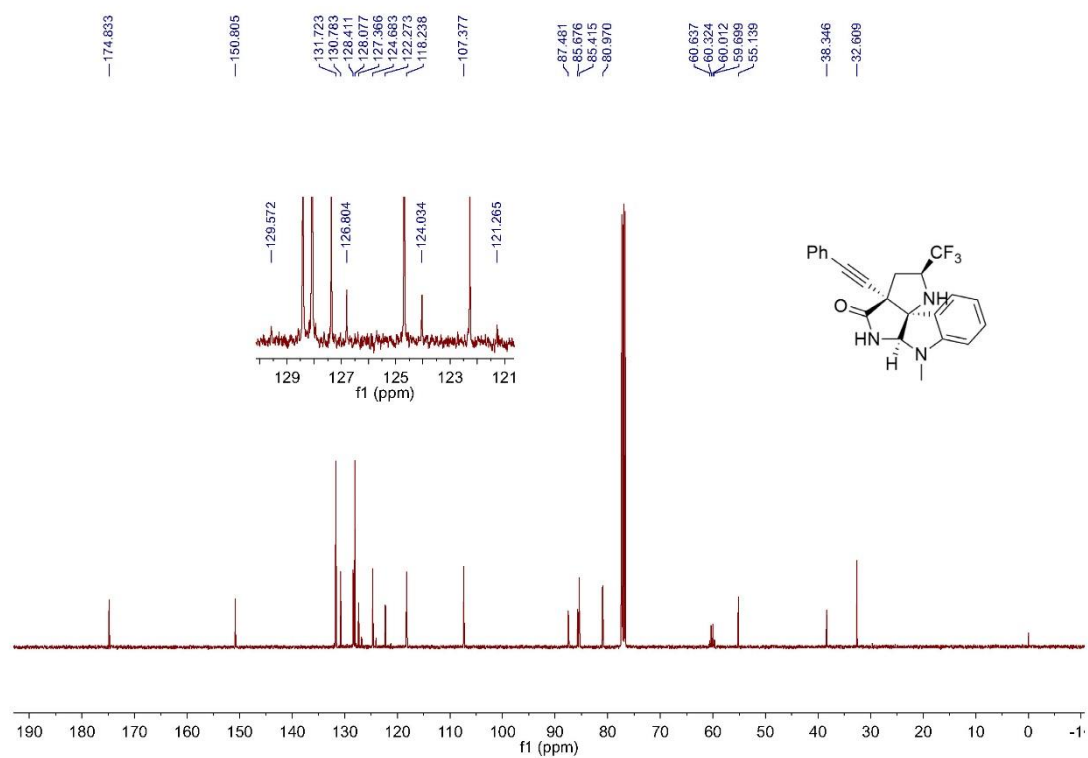

<sup>19</sup>F NMR spectrum of **5aa** in CDCl<sub>3</sub>, 376 MHz

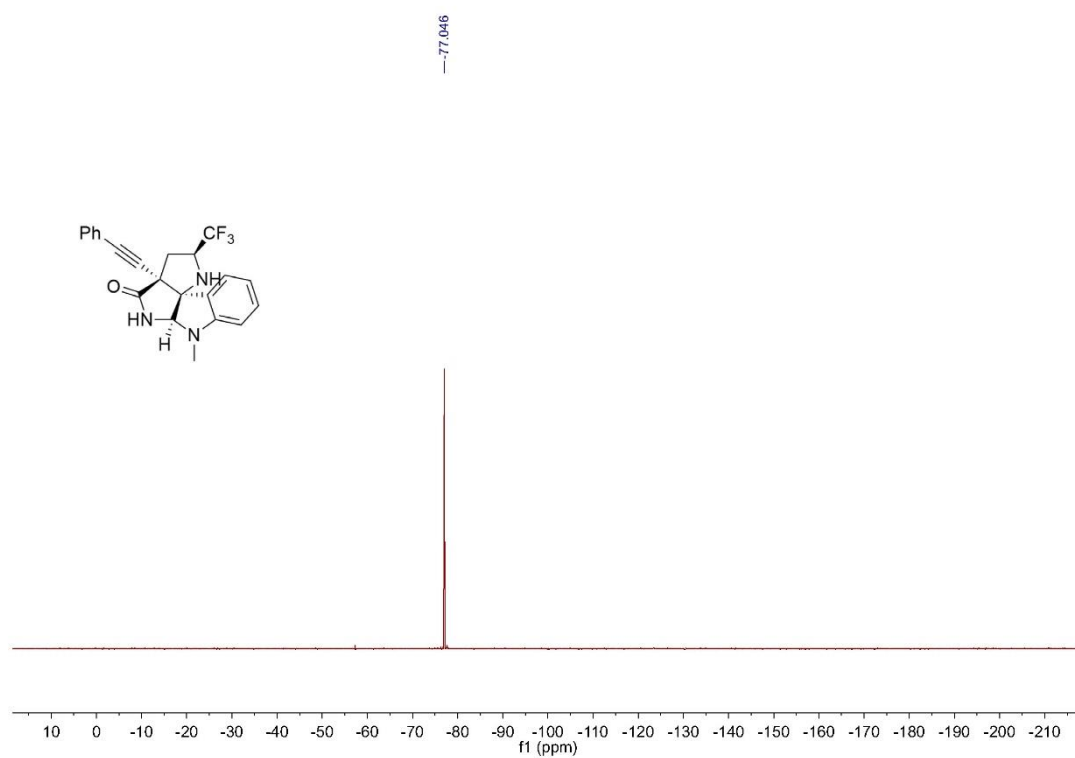

Supplement: d3sc02705h1.pdf [file d3sc02705h1.pdf]
